# Supplementary material for: Targeting sex determination to suppress mosquito populations
Source: eLife. 2024 Jan 30;12:RP90199. doi: 10.7554/eLife.90199 (PMC10945564; doi:10.7554/eLife.90199)
Supplement: Supplementary file 1. — (a) gRNA and primer sequences. (b) Measurements of mosquito morphological structures. (c) Data for dsx and ix single-gene disruption. (d) Data from precision-guided sterile insect technique (pgSIT) genetic cross: dsx, ix, and βTub simultaneous gene disruption. (e) Data on female blood feeding assay. (f) Data on flight activity. (g) Fitness parameters and longevity. (h) pgSIT males sterilize WT females. (i) Data on population suppression. (j) RNA sequencing differential expression analysis using DeSeq2 comparing pgSIT female to WT Liverpool female. (k) RNA sequencing differential expression analysis using DeSeq2 comparing pgSIT male to WT Liverpool male. (l) Life history parameters used in mathematical modeling. (m) Network structure and training schemes for the regression surrogate models. (n) Primers and gRNA sequences for SENSR assay. (o) SENSR assay raw data. [file elife-90199-supp1.xlsx]

## Sheet: Supplementary file 1a
Supplementary file 1a. gRNA and primer sequences
gRNA ID	Description	gRNA Genomic Target Sequence (5' – 3', PAM [NGG])	DNA strand	Cleavage activity
gRNA[dsx]#1	dsx gRNA targets sequence 1	AGCGACATGCAGCCATTCTGGG	Sense	Cleavage
gRNA[dsx]#2	dsx gRNA targets sequence 2	CTCACAAGTAGAGCTACACGTGG	Antisense	Cleavage
gRNA[dsx]#3	dsx gRNA targets sequence 3	GGTAGCTGGCCGTTGCCAAACGG	Sense	No cleavage
gRNA[dsx]#4	dsx gRNA targets sequence 4	CTGTCGTCGTTTTTTTCCGGTGG	Antisense	Cleavage
gRNA[ix]#1	ix gRNA targets sequence 1	GCGGGATTCGCTCTCGACGACGG	Sense	No cleavage
gRNA[ix]#2	ix gRNA targets sequence 2	GGACAACATTTCCAAGGTTAAGG	Sense	Cleavage
Primer ID	Description	5' - Sequence - 3'
dsx F	dsx Foward Primer	GGGCTTTCGTCCTAGAAGAATAA
dsx R	dsx Reverse Primer	TTGCGGTGAGAGACATTAACA
ix F	ix Foward Primer	GCACTTTGCAGACGTTCTTTC
ix R	ix Reverse Primer	CCATCCGGATTCCGAAGATTAC

## Sheet: Supplementary file 1b
Supplementary file 1b. Measurements of mosquito morphological structures
female #	Tip of thorax to abdomen (mm)	Wing (mm)	Proboscis (mm)	Antennae (mm)	Palp left (mm)	Palp right (mm)	Ovary left (mm)	Ovary right (mm)
WT ♀	4.5	3.4	2.1	1.8	0.5	0.5	1.2	1.1
WT ♀	4.6	3.7	2.2	1.9	0.6	0.6	1.2	1.4
WT ♀	4.5	3.4	2.1	1.7	0.6	0.6	1.2	1.2
WT ♀	4.4	3.3	2.1	1.9	0.6	0.6	1.2	1.2
WT ♀	4.5	3.5	2.1	1.9	0.6	0.6	1.2	1.2
WT ♀	4.8	3.7	2.2	2	0.6	0.6	1.4	1.5
WT ♀	4.5	3.2	2.1	1.8	0.6	0.5	1.2	1.2
WT ♀	4.7	3.6	2.1	1.9	0.6	0.6	1.3	1.2
WT ♀	4.6	3.3	2.1	1.8	0.6	0.6	1.2	1.3
WT ♀	4.6	3.4	2.1	1.8	0.5	0.5	1.2	1.2
WT ♀	4.7	3.6	2.2	1.9	0.6	0.6	1.3	1.2
WT ♀	4.6	3.5	2.1	1.8	0.6	0.6	1.2	1.3
WT ♀	4.7	3.5	2.1	1.8	0.6	0.6	1.2	1.4
WT ♀	4.6	3.5	2	1.8	0.6	0.6	1.1	1.2
WT ♀	4.7	3.8	2.2	1.8	0.6	0.6	1.3	1.2
Cas9 ♀	4.7	3.6	2	1.9	0.6	0.6	1.4	1.3
Cas9 ♀	4.8	3.7	2.1	2.1	0.6	0.6	1.4	1.4
Cas9 ♀	4.4	3.5	1.9	1.8	0.5	0.5	1.2	1.3
Cas9 ♀	4.6	3.6	2.1	1.9	0.6	0.6	1.3	1.2
Cas9 ♀	4.9	3.8	2.2	2.2	0.6	0.6	1.6	1.5
Cas9 ♀	4.7	3.7	2.1	2.1	0.6	0.6	1.4	1.4
Cas9 ♀	4.2	3.3	1.8	1.9	0.5	0.5	1.1	1.2
Cas9 ♀	4.4	3.4	2	1.9	0.5	0.5	1.3	1.2
Cas9 ♀	4.7	3.5	2.1	1.9	0.6	0.6	1.4	1.3
Cas9 ♀	4.5	3.4	1.9	1.9	0.5	0.5	1.2	1.2
Cas9 ♀	4.6	3.5	2.1	2	0.6	0.6	1.1	1.2
Cas9 ♀	4.7	3.6	2.1	1.9	0.6	0.6	1.3	1.3
Cas9 ♀	4.3	3.2	1.8	1.8	0.5	0.5	1.2	1.2
Cas9 ♀	4.7	3.7	2.1	2	0.6	0.6	1.2	1.4
Cas9 ♀	4.6	3.5	2.1	1.9	0.6	0.6	1.3	1.3
gRNA[dsx] ♀	4.4	3.4	2.1	1.8	0.5	0.5	1.2	1.2
gRNA[dsx] ♀	4.6	3.5	2.2	1.8	0.6	0.6	1.4	1.3
gRNA[dsx] ♀	4.4	3.3	2.2	1.7	0.6	0.6	1.2	1.2
gRNA[dsx] ♀	4.5	3.4	2.1	1.8	0.6	0.6	1.2	1.2
gRNA[dsx] ♀	4.7	3.6	2.2	1.8	0.6	0.6	1.2	1.2
gRNA[dsx] ♀	4.6	3.5	2.1	1.9	0.6	0.6	1.2	1.2
gRNA[dsx] ♀	4.6	3.5	2.1	1.8	0.5	0.5	1.5	1.5
gRNA[dsx] ♀	4.6	3.5	2.1	2	0.5	0.5	1.2	1.3
gRNA[dsx] ♀	4.4	3.2	2.1	1.8	0.5	0.5	1.2	1.2
gRNA[dsx] ♀	4.4	3.4	2.1	1.8	0.5	0.5	1.2	1.2
gRNA[dsx] ♀	4.6	3.4	2.2	1.8	0.5	0.5	1.2	1.4
gRNA[dsx] ♀	4.8	3.7	2.2	1.8	0.5	0.5	1.6	1.4
gRNA[dsx] ♀	4.3	3.2	2.2	1.5	0.6	0.6	1.2	1.2
gRNA[dsx] ♀	4.6	3.5	2.3	1.8	0.6	0.6	1.2	1.2
gRNA[dsx] ♀	4.7	3.7	2.3	1.8	0.6	0.6	1.3	1.2
gRNA[ix] ♀	4.4	3.4	2.1	1.8	0.5	0.5	1.2	1.2
gRNA[ix] ♀	4.6	3.5	2.2	1.8	0.6	0.6	1.4	1.3
gRNA[ix] ♀	4.4	3.3	2.2	1.7	0.6	0.6	1.2	1.2
gRNA[ix] ♀	4.5	3.4	2.1	1.8	0.6	0.6	1.2	1.2
gRNA[ix] ♀	4.7	3.6	2.2	1.8	0.6	0.6	1.2	1.2
gRNA[ix] ♀	4.6	3.5	2.1	1.9	0.6	0.6	1.2	1.2
gRNA[ix] ♀	4.6	3.5	2.1	1.8	0.5	0.5	1.5	1.5
gRNA[ix] ♀	4.6	3.5	2.1	2	0.5	0.5	1.2	1.3
gRNA[ix] ♀	4.4	3.2	2.1	1.8	0.5	0.5	1.2	1.2
gRNA[ix] ♀	4.4	3.4	2.1	1.8	0.5	0.5	1.2	1.2
gRNA[ix] ♀	4.6	3.4	2.2	1.8	0.5	0.5	1.2	1.4
gRNA[ix] ♀	4.8	3.7	2.2	1.8	0.5	0.5	1.6	1.4
gRNA[ix] ♀	4.3	3.2	2.2	1.5	0.6	0.6	1.2	1.2
gRNA[ix] ♀	4.6	3.5	2.3	1.8	0.6	0.6	1.2	1.2
gRNA[ix] ♀	4.7	3.7	2.3	1.8	0.6	0.6	1.3	1.2
gRNA[dsx-ix-βTub] ♀	4.7	3.5	2.1	1.8	0.6	0.6	1.2	1.2
gRNA[dsx-ix-βTub] ♀	4.7	3.5	2.1	1.9	0.6	0.6	1.3	1.4
gRNA[dsx-ix-βTub] ♀	4.7	3.5	2.1	1.8	0.6	0.6	1.2	1.2
gRNA[dsx-ix-βTub] ♀	4.8	3.4	2.1	1.9	0.6	0.6	1.5	1.5
gRNA[dsx-ix-βTub] ♀	4.5	3.4	1.9	1.7	0.5	0.5	1.2	1.2
gRNA[dsx-ix-βTub] ♀	4.7	3.5	2.1	1.8	0.5	0.5	1.2	1.2
gRNA[dsx-ix-βTub] ♀	4.6	3.5	2.1	1.8	0.5	0.5	1.2	1.3
gRNA[dsx-ix-βTub] ♀	4.8	3.7	2.2	1.9	0.5	0.5	1.4	1.4
gRNA[dsx-ix-βTub] ♀	4.6	3.4	2.1	1.8	0.5	0.5	1.2	1.2
gRNA[dsx-ix-βTub] ♀	4.7	3.4	2.1	1.8	0.5	0.5	1.5	1.3
gRNA[dsx-ix-βTub] ♀	4.5	3.4	2	1.8	0.5	0.5	1.2	1.2
gRNA[dsx-ix-βTub] ♀	4.5	3.4	2.1	1.8	0.5	0.5	1.2	1.2
gRNA[dsx-ix-βTub] ♀	4.9	3.4	2.3	2	0.5	0.5	1.5	1.6
gRNA[dsx-ix-βTub] ♀	4.6	3.4	2.1	1.8	0.5	0.5	1.4	1.2
gRNA[dsx-ix-βTub] ♀	4.6	3.4	2.1	1.8	0.6	0.6	1.2	1.3
dsx KO ♀	4.3	3.1	2.1	1.7	1.6	1.1	0.9	0.8
dsx KO ♀	4.3	3	2.1	1.6	1.3	1.3	1.2	0.9
dsx KO ♀	4.2	2.7	1.9	1.7	1.9	1.2	0.9	0.8
dsx KO ♀	4.3	2.9	2	1.7	1.6	1.2	0.9	1.1
dsx KO ♀	4.3	2.9	2.1	1.8	1.4	1.5	0.9	0.6
dsx KO ♀	4.1	3.5	1.9	1.7	1.2	1.4	0.8	1.1
dsx KO ♀	4	2.8	1.8	1.7	1.4	1.7	0.9	0.9
dsx KO ♀	4.1	3.1	2.1	1.6	1.8	1.3	0.9	0.8
dsx KO ♀	3.9	2.8	1.7	1.7	1.4	1	0.9	1.2
dsx KO ♀	4.3	3.2	2.1	1.7	1.3	1.4	0.9	0.9
dsx KO ♀	4.3	3	2.2	1.7	1.7	1.3	0.9	0.9
dsx KO ♀	4.2	3.2	2.1	1.8	1.9	1.3	1.1	0.9
dsx KO ♀	4.3	2.9	2.1	1.7	1.4	1.1	0.9	1.1
dsx KO ♀	3.9	2.8	2.1	1.6	1.3	1.7	0.9	0.9
dsx KO ♀	3.9	2.5	1.8	1.5	1.1	1.6	0.8	0.7
ix KO ♀	4.4	3.2	2.1	1.8	0.9	0.6	0.9	1.1
ix KO ♀	4.2	3.1	1.9	1.7	1.1	0.8	1.2	0.9
ix KO ♀	4.4	3.3	2.1	1.9	0.9	0.8	1.2	1.2
ix KO ♀	4.4	3.2	2.1	1.8	0.8	0.7	0.8	0.7
ix KO ♀	4.3	3.2	1.8	1.9	0.7	0.8	1.2	1.2
ix KO ♀	4.4	3.2	2.1	1.8	0.8	0.6	0.9	0.9
ix KO ♀	4.4	3.2	2	1.8	0.8	0.8	1.2	1.2
ix KO ♀	4.2	3.1	2.1	1.7	0.7	0.5	1.2	1.3
ix KO ♀	4.1	2.9	2.1	1.7	0.5	0.9	1.1	1.2
ix KO ♀	4.3	3.2	2.1	1.8	0.5	0.6	0.7	1.2
ix KO ♀	4	3.1	1.9	1.6	0.6	0.4	1.2	0.8
ix KO ♀	4.2	3.2	2.1	1.8	0.6	0.9	1.2	1.2
ix KO ♀	4.2	3.3	2	1.8	0.7	0.9	1.3	1.1
ix KO ♀	4.5	3.4	2.1	1.8	0.8	0.7	1.1	1
ix KO ♀	4.4	3.1	2.1	1.9	0.9	0.8	0.7	1.2
dsx-ix-βTub KO ♀	3.9	2.7	1.7	1.6	0.8	1.2	0.5	0.4
dsx-ix-βTub KO ♀	4.1	2.8	2	1.7	1.1	1.1	0.8	0.4
dsx-ix-βTub KO ♀	4	2.8	2.1	1.7	0.8	0.8	0.3	0.5
dsx-ix-βTub KO ♀	4.1	2.9	2	1.8	0.9	1	0.6	0.5
dsx-ix-βTub KO ♀	3.8	2.7	1.8	1.6	1.2	1.1	0.5	0.4
dsx-ix-βTub KO ♀	4.1	2.8	2.1	1.8	1.1	1.2	0.3	0.5
dsx-ix-βTub KO ♀	4.2	3.1	1.9	1.8	1.2	1.2	0.5	0.5
dsx-ix-βTub KO ♀	4.1	2.9	2.2	1.7	1.5	1.4	0.5	0.4
dsx-ix-βTub KO ♀	4.3	3	2.1	1.7	1.2	0.8	0.4	0.5
dsx-ix-βTub KO ♀	4.5	3.2	2.2	1.8	1.4	0.9	0.5	0.7
dsx-ix-βTub KO ♀	3.9	2.7	1.7	1.5	1.1	1.4	0.4	0.4
dsx-ix-βTub KO ♀	4.2	3.1	2.1	1.8	0.9	1.2	0.4	0.3
dsx-ix-βTub KO ♀	4	2.9	1.8	1.7	0.8	1.1	0.5	0.4
dsx-ix-βTub KO ♀	4.2	3.1	2.1	1.9	0.9	1.2	0.3	0.5
dsx-ix-βTub KO ♀	4.2	2.9	2.1	1.8	1.3	1.5	0.5	0.4
male #	Tip of thorax to abdomen (mm)	Wing (mm)	Proboscis (mm)	Antennae (mm)	Palp left (mm)	Palp right (mm)	Testes left (mm)	Testes right (mm)	Accessory gland left (mm)	Accessory gland right (mm)
WT ♂	3.8	2.5	2	1.5	2.1	2.1	0.4	0.4	0.37	0.33
WT ♂	3.7	2.5	2.1	1.5	1.9	1.9	0.5	0.5	0.35	0.34
WT ♂	3.9	2.6	2.2	1.6	2.1	2.1	0.5	0.5	0.39	0.35555
WT ♂	3.6	2.4	1.9	1.4	1.8	1.7	0.5	0.5	0.35	0.38095
WT ♂	3.8	2.6	2	1.5	2	2	0.5	0.5	0.35555	0.34603
WT ♂	3.6	2.5	1.8	1.5	1.8	1.8	0.4	0.4	0.34	0.34901
WT ♂	3.7	2.6	1.9	1.5	1.8	1.9	0.5	0.5	0.34	0.36
WT ♂	3.7	2.5	1.8	1.5	1.9	1.9	0.4	0.5	0.35	0.36
WT ♂	3.8	2.6	2.1	1.5	2.1	2	0.4	0.4	0.37777	0.34
WT ♂	3.7	2.5	1.8	1.5	1.9	1.9	0.5	0.5	0.35	0.37
WT ♂	3.8	2.6	1.9	1.5	2	2	0.5	0.5	0.38	0.38
WT ♂	3.8	2.6	2.2	1.6	2.1	2.2	0.4	0.4	0.36	0.37
WT ♂	3.5	2.4	1.7	1.4	1.7	1.7	0.4	0.5	0.35	0.34603
WT ♂	3.7	2.5	1.8	1.5	1.8	1.8	0.5	0.5	0.33	0.34901
WT ♂	3.8	2.6	2	1.5	2.1	2.1	0.5	0.5	0.36	0.36
Cas9 ♂	3.6	2.4	1.8	1.3	1.7	1.7	0.4	0.5	0.37	0.38095
Cas9 ♂	3.5	2.4	1.7	1.4	1.8	1.8	0.5	0.3	0.37	0.37
Cas9 ♂	3.9	2.7	1.8	1.3	1.9	1.9	0.5	0.6	0.39	0.38
Cas9 ♂	3.8	2.6	1.9	1.5	1.9	1.9	0.3	0.5	0.39	0.39
Cas9 ♂	3.9	2.6	2	1.5	2	2	0.6	0.6	0.38	0.37
Cas9 ♂	3.9	2.7	2.1	1.5	2.1	2.1	0.6	0.6	0.39	0.38
Cas9 ♂	3.7	2.6	1.6	1.2	1.7	1.6	0.5	0.5	0.36	0.37
Cas9 ♂	3.6	2.6	1.6	1.2	1.7	1.7	0.5	0.5	0.35	0.37
Cas9 ♂	4	2.8	2.2	1.5	2.1	2.1	0.6	0.5	0.39	0.38
Cas9 ♂	3.6	2.5	1.7	1.3	1.6	1.6	0.4	0.5	0.35	0.35
Cas9 ♂	3.8	2.7	1.8	1.5	1.9	1.9	0.5	0.5	0.38	0.37
Cas9 ♂	3.5	2.4	1.8	1.2	1.6	1.6	0.5	0.4	0.35	0.36
Cas9 ♂	3.8	2.6	1.9	1.5	1.8	1.8	0.5	0.4	0.39	0.37
Cas9 ♂	3.7	2.6	1.7	1.4	1.8	1.8	0.6	0.5	0.36	0.38
Cas9 ♂	3.9	2.8	2.1	1.6	2.1	2.2	0.5	0.5	0.39	0.37
gRNA[dsx] ♂	3.9	2.6	1.9	1.5	2	1.9	0.5	0.5	0.38	0.37
gRNA[dsx] ♂	3.7	2.6	1.7	1.2	2	2	0.6	0.5	0.36	0.4
gRNA[dsx] ♂	3.7	2.5	1.6	1.3	1.9	1.9	0.5	0.5	0.37	0.33
gRNA[dsx] ♂	3.8	2.6	1.9	1.4	1.8	1.8	0.4	0.5	0.35	0.38095
gRNA[dsx] ♂	3.8	2.6	2	1.5	1.9	1.9	0.5	0.5	0.38	0.37
gRNA[dsx] ♂	3.8	2.5	2.1	1.6	1.9	1.9	0.6	0.5	0.33	0.36
gRNA[dsx] ♂	3.8	2.6	1.9	1.5	2	1.9	0.5	0.5	0.35	0.35
gRNA[dsx] ♂	3.8	2.6	1.9	1.5	1.9	1.9	0.5	0.4	0.35	0.38
gRNA[dsx] ♂	3.8	2.5	2	1.5	1.8	1.8	0.5	0.4	0.36	0.34
gRNA[dsx] ♂	3.7	2.5	1.8	1.5	1.8	1.8	0.5	0.5	0.39	0.36
gRNA[dsx] ♂	3.8	2.5	1.9	1.3	1.9	1.9	0.5	0.5	0.37	0.39
gRNA[dsx] ♂	3.8	2.6	2	1.6	2	2.1	0.4	0.5	0.36	0.35
gRNA[dsx] ♂	3.9	2.6	2.1	1.6	1.9	1.9	0.5	0.6	0.36	0.33
gRNA[dsx] ♂	3.8	2.7	2	1.5	2.1	2.1	0.5	0.4	0.35	0.39
gRNA[dsx] ♂	3.8	2.6	2.2	1.5	1.9	1.9	0.5	0.5	0.38	0.41
gRNA[ix] ♂	3.8	2.5	1.9	1.4	1.9	1.8	0.5	0.5	0.38	0.38
gRNA[ix] ♂	3.6	2.5	1.8	1.4	1.8	1.8	0.4	0.5	0.37	0.39
gRNA[ix] ♂	3.8	2.7	1.9	1.5	2	2	0.5	0.5	0.38	0.36
gRNA[ix] ♂	3.8	2.6	1.9	1.5	1.9	1.9	0.5	0.5	0.37	0.37
gRNA[ix] ♂	3.7	2.6	1.7	1.4	1.8	1.8	0.6	0.5	0.35	0.35
gRNA[ix] ♂	3.7	2.6	1.8	1.4	1.7	1.8	0.4	0.5	0.35	0.34
gRNA[ix] ♂	3.9	2.7	2	1.5	1.9	1.9	0.5	0.6	0.34	0.33
gRNA[ix] ♂	3.9	2.6	2.1	1.6	1.8	1.8	0.5	0.5	0.35	0.39
gRNA[ix] ♂	3.7	2.5	1.7	1.4	1.8	1.8	0.5	0.5	0.37	0.35
gRNA[ix] ♂	3.9	2.6	1.8	1.3	2.1	2.1	0.5	0.5	0.38	0.31
gRNA[ix] ♂	3.6	2.6	1.7	1.2	1.7	1.6	0.4	0.5	0.35	0.33
gRNA[ix] ♂	3.7	2.6	1.8	1.3	1.8	1.8	0.5	0.5	0.36	0.38
gRNA[ix] ♂	3.8	2.5	1.9	1.3	1.9	1.9	0.6	0.6	0.34	0.35
gRNA[ix] ♂	3.9	2.6	2.1	1.6	2	2	0.5	0.5	0.35	0.36
gRNA[ix] ♂	3.7	2.6	1.9	1.5	1.8	1.8	0.5	0.5	0.33	0.36
gRNA[dsx-ix-βTub] ♂	3.8	2.6	1.8	1.4	1.8	1.8	0.5	0.5	0.34	0.36
gRNA[dsx-ix-βTub] ♂	3.7	2.5	1.8	1.4	1.8	1.8	0.5	0.5	0.38	0.36
gRNA[dsx-ix-βTub] ♂	3.7	2.5	1.7	1.3	1.7	1.6	0.5	0.5	0.36	0.36
gRNA[dsx-ix-βTub] ♂	3.8	2.7	1.9	1.4	1.8	1.8	0.4	0.5	0.36	0.33
gRNA[dsx-ix-βTub] ♂	3.7	2.7	1.7	1.3	1.6	1.6	0.5	0.5	0.37	0.34
gRNA[dsx-ix-βTub] ♂	3.9	2.7	2.1	1.6	2.1	2.1	0.6	0.6	0.36	0.39
gRNA[dsx-ix-βTub] ♂	3.8	2.8	1.9	1.3	2.1	2.1	0.5	0.5	0.38	0.38
gRNA[dsx-ix-βTub] ♂	3.9	2.8	2.1	1.6	1.9	1.9	0.6	0.6	0.39	0.37
gRNA[dsx-ix-βTub] ♂	3.8	2.9	1.9	1.4	1.9	1.9	0.5	0.5	0.35	0.38
gRNA[dsx-ix-βTub] ♂	3.9	2.8	2	1.5	1.9	1.9	0.5	0.4	0.37	0.4
gRNA[dsx-ix-βTub] ♂	3.7	2.6	1.7	1.3	1.6	1.6	0.5	0.5	0.37	0.35
gRNA[dsx-ix-βTub] ♂	3.5	2.5	1.6	1.2	1.5	1.5	0.5	0.5	0.38	0.38
gRNA[dsx-ix-βTub] ♂	3.5	2.5	1.5	1.1	1.6	1.6	0.5	0.5	0.37	0.37
gRNA[dsx-ix-βTub] ♂	3.6	2.5	1.7	1.2	1.7	1.7	0.4	0.5	0.37	0.38
gRNA[dsx-ix-βTub] ♂	3.8	2.7	2.1	1.7	2	1.9	0.5	0.5	0.38	0.39
dsx KO ♂	3.7	2.7	1.9	1.5	1.8	1.8	0.5	0.5	0.35	0.37
dsx KO ♂	3.8	2.7	1.9	1.6	1.8	1.8	0.5	0.5	0.35	0.35
dsx KO ♂	3.7	2.7	1.8	1.5	1.8	1.8	0.5	0.5	0.35	0.35
dsx KO ♂	3.8	2.8	1.8	1.5	1.8	1.8	0.5	0.5	0.36	0.35
dsx KO ♂	3.8	2.7	1.8	1.5	1.8	1.7	0.5	0.5	0.35	0.35
dsx KO ♂	3.7	2.7	1.9	1.5	1.9	1.9	0.5	0.5	0.36	0.35
dsx KO ♂	3.8	2.7	1.8	1.6	1.8	1.8	0.5	0.5	0.36	0.36
dsx KO ♂	3.7	2.8	1.9	1.5	1.9	1.9	0.5	0.6	0.37	0.37
dsx KO ♂	3.8	2.8	1.9	1.5	1.9	1.9	0.5	0.5	0.37	0.37
dsx KO ♂	3.7	2.7	1.9	1.5	1.9	1.9	0.5	0.5	0.37	0.36
dsx KO ♂	3.8	2.8	2	1.6	1.7	1.7	0.5	0.5	0.36	0.35
dsx KO ♂	3.7	2.7	1.8	1.5	1.8	1.8	0.5	0.5	0.39	0.39
dsx KO ♂	3.9	2.7	1.8	1.5	1.8	1.8	0.4	0.5	0.39	0.39
dsx KO ♂	3.7	2.6	1.8	1.5	1.8	1.8	0.5	0.5	0.36	0.39
dsx KO ♂	3.8	2.7	1.8	1.6	1.8	1.8	0.5	0.5	0.39	0.36
ix KO ♂	3.8	2.8	1.8	1.6	1.8	1.8	0.5	0.5	0.37	0.37
ix KO ♂	3.7	2.8	1.8	1.5	1.8	1.8	0.5	0.5	0.37	0.37
ix KO ♂	3.7	2.7	1.8	1.6	1.8	1.8	0.5	0.5	0.37	0.37
ix KO ♂	3.7	2.7	1.9	1.5	1.7	1.7	0.6	0.6	0.36	0.37
ix KO ♂	3.9	2.8	1.9	1.5	1.8	1.8	0.5	0.5	0.37	0.37
ix KO ♂	3.8	2.7	1.8	1.5	1.8	1.9	0.5	0.5	0.36	0.36
ix KO ♂	3.8	2.8	1.8	1.5	1.8	1.8	0.6	0.5	0.37	0.36
ix KO ♂	3.8	2.7	1.8	1.5	1.8	1.8	0.5	0.6	0.35	0.35
ix KO ♂	3.7	2.7	2	1.6	1.9	1.9	0.5	0.5	0.35	0.35
ix KO ♂	3.7	2.8	1.8	1.6	1.9	1.9	0.5	0.4	0.36	0.36
ix KO ♂	3.7	2.7	1.8	1.5	1.8	1.8	0.5	0.5	0.36	0.36
ix KO ♂	3.8	2.8	1.9	1.5	1.9	1.8	0.5	0.5	0.36	0.36
ix KO ♂	3.8	2.7	1.9	1.5	1.8	1.8	0.5	0.5	0.36	0.36
ix KO ♂	3.7	2.8	1.8	1.6	1.8	1.8	0.5	0.5	0.37	0.37
ix KO ♂	3.7	2.7	1.9	1.6	1.8	1.8	0.5	0.5	0.37	0.37
dsx-ix-βTub KO ♂	3.8	2.6	2	1.5	1.9	1.9	0.5	0.5	0.35	0.35
dsx-ix-βTub KO ♂	3.9	2.7	2	1.5	2	2	0.5	0.5	0.35	0.33
dsx-ix-βTub KO ♂	3.9	2.7	2.1	1.6	2.1	2	0.5	0.5	0.36	0.36
dsx-ix-βTub KO ♂	3.5	2.6	1.7	1.3	1.7	1.7	0.5	0.4	0.35	0.35
dsx-ix-βTub KO ♂	3.7	2.6	1.8	1.4	1.7	1.7	0.5	0.5	0.34	0.35
dsx-ix-βTub KO ♂	3.8	2.7	1.9	1.4	1.8	1.8	0.5	0.5	0.35	0.32
dsx-ix-βTub KO ♂	3.9	2.8	1.9	1.5	1.8	1.9	0.6	0.6	0.36	0.36
dsx-ix-βTub KO ♂	3.5	2.5	1.6	1.3	1.6	1.6	0.4	0.5	0.35	0.35
dsx-ix-βTub KO ♂	3.7	2.6	1.6	1.2	1.5	1.5	0.5	0.4	0.35	0.38
dsx-ix-βTub KO ♂	3.8	2.8	1.9	1.4	1.9	1.9	0.5	0.5	0.36	0.36
dsx-ix-βTub KO ♂	3.9	2.7	2.1	1.6	2.1	2.1	0.5	0.5	0.35	0.36
dsx-ix-βTub KO ♂	3.7	2.6	1.6	1.3	1.6	1.6	0.4	0.4	0.35	0.35
dsx-ix-βTub KO ♂	3.8	2.7	1.8	1.3	1.9	1.9	0.5	0.5	0.35	0.35
dsx-ix-βTub KO ♂	3.7	2.7	1.8	1.3	1.7	1.7	0.5	0.5	0.35	0.35
dsx-ix-βTub KO ♂	3.5	2.5	1.6	1.3	1.5	1.5	0.4	0.5	0.36	0.37

## Sheet: Supplementary file 1c
Supplementary file 1c. Data for dsx and ix single-gene disruption
Parents of the group	Egg #	Number of eggs per ♀ laid	Normalized number of eggs per ♀ laid	Hatched egg #	Hatching rate	Adult#	larval death %	Egg-to-adult survival	F1 progeny	♂ pupa #	♂ pupal eclosion death	♂ pupa-adult survival	♀ pupa #	♀ pupal eclosion death#	♀ pupa-adult survival	Blood taking ♀	♀ blood taking rate	♂ adult %	⚥#	⚥ pupal eclosion death	⚥ pupal mortality	Survival ⚥ #	⚥ survial %	⚥ take blood	⚥ blood taking rate	Eggs by (F1 ⚥ X 100 wt ♂)	Number of eggs per ⚥ laid	Normalized number of eggs per ⚥ laid	Hatched eggs by (F1 ⚥ X 100 wt ♂)	Hatched eggs % by (F1 ⚥ X 100 wt ♂)	Eggs by (5 wt ♀ X 5 F1 ♂)	Normalized number of eggs per one wt ♀ mated with 5 F1 ♂	Hatch eggs by (5 wt ♀ X 5 F1 ♂	Hatched eggs % by (5 wt ♀ X 5 F1 ♂)
5 wt♂ X 5 wt♀	568	113.6	100	545	95.9507	488	6.78899	85.9155	+/+	251	11	0.956175	257	9	96.4981	236	95.1613	49.1803	0
5 wt♂ X 5 wt♀	529	105.8	93.1338	502	94.896	462	4.18327	87.3346	+/+	243	13	0.946502	238	6	97.479	228	98.2759	49.7835	0
5 wt♂ X 5 wt♀	503	100.6	88.5563	481	95.6262	423	8.52391	84.0954	+/+	226	10	0.955752	214	7	96.729	205	99.0338	51.0638	0
5 wt♂ X 5 nup50-Cas9/nup50-Cas9♀	454	90.8	79.9296	427	94.0529	365	11.7096	80.3965	+/nup50-Cas9/nup50-Cas9	195	7	0.964103	182	5	97.2527	172	97.1751	51.5068	0
5 wt♂ X 5 nup50-Cas9/nup50-Cas9♀	497	99.4	87.5	458	92.1529	402	7.64192	80.8853	+/nup50-Cas9/nup50-Cas9	215	12	0.944186	208	9	95.6731	188	94.4724	50.4975	0
5 wt♂ X 5 nup50-Cas9/nup50-Cas9♀	411	82.2	72.3592	362	88.0779	302	10.221	73.4793	+/nup50-Cas9/nup50-Cas9	153	9	0.941176	172	14	91.8605	155	98.1013	47.6821	0
5 nup50-Cas9/nup50-Cas♂ X 5 wt♀	448	89.6	78.8732	403	89.9554	339	11.4144	75.6696	+/nup50-Cas9/nup50-Cas9	182	6	0.967033	175	12	93.1429	159	97.546	51.9174	0
5 nup50-Cas9/nup50-Cas♂ X 5 wt♀	515	103	90.669	486	94.3689	431	6.3786	83.6893	+/nup50-Cas9/nup50-Cas9	237	15	0.936709	218	9	95.8716	201	96.1722	51.5081	0
5 nup50-Cas9/nup50-Cas♂ X 5 wt♀	537	107.4	94.5423	502	93.4823	432	7.56972	80.4469	+/nup50-Cas9/nup50-Cas9	239	12	0.949791	225	20	91.1111	199	97.0732	52.5463	0
5 gRNA[dsx]#1/+♂ X 5 wt♀	553	110.6	97.3592	515	93.1284	463	5.82524	83.7251	gRNA[dsx]#1♂/+	124	5	0.959677	122	8	93.4426	110	96.4912	48.5961	0
5 gRNA[dsx]#1/+♂ X 5 wt♀	475	95	83.6268	445	93.6842	399	6.51685	84	gRNA[dsx]#1♂/+	89	3	0.966292	113	5	95.5752	107	99.0741	47.8697	0
5 gRNA[dsx]#1/+♂ X 5 wt♀	511	102.2	89.9648	487	95.3033	422	10.4723	82.5832	gRNA[dsx]#1♂/+	114	4	0.964912	117	3	97.4359	111	97.3684	50.9479	0
									gRNA[dsx]#1♂. +/+	112	6	0.946429	127	3	97.6378	122	98.3871		0
									gRNA[dsx]#1♂. +/+	110	5	0.954545	104	4	96.1538	97	97		0
									gRNA[dsx]#1♂. +/+	109	4	0.963303	96	3	96.875	92	98.9247		0
5 wt♂ X 5 gRNA[dsx]#1/+♀	408	81.6	71.831	373	91.4216	317	11.2601	77.6961	gRNA[dsx]#1♀/+	92	4	0.956522	86	5	94.186	78	96.2963	51.4196	0
5 wt♂ X 5 gRNA[dsx]#1/+♀	546	109.2	96.1268	513	93.956	461	6.23782	84.4322	gRNA[dsx]#1♀/+	122	5	0.959016	115	4	96.5217	108	97.2973	49.8915	0
5 wt♂ X 5 gRNA[dsx]#1/+♀	505	101	88.9085	468	92.6733	415	7.69231	82.1782	gRNA[dsx]#1♀/+	113	6	0.946903	98	3	96.9388	93	97.8947	50.3614	0
									gRNA[dsx]#1♀. +/+	78	3	0.961538	75	2	97.3333	70	95.8904		0
									gRNA[dsx]#1♀. +/+	119	6	0.94958	125	5	96	116	96.6667		0
									gRNA[dsx]#1♀. +/+	106	4	0.962264	115	4	96.5217	108	97.2973		0
5 gRNA[dsx]#2/+♂ X 5 wt♀	505	101	88.9085	487	96.4356	418	10.6776	82.7723	gRNA[dsx]#2♂/+	107	2	0.981308	93	4	95.6989	87	97.7528	54.5455	0
5 gRNA[dsx]#2/+♂ X 5 wt♀	612	122.4	107.746	573	93.6275	495	9.24956	80.8824	gRNA[dsx]#2♂/+	137	6	0.956204	123	5	95.935	116	98.3051	51.9192	0
5 gRNA[dsx]#2/+♂ X 5 wt♀	553	110.6	97.3592	516	93.3092	454	8.13953	82.0976	gRNA[dsx]#2♂/+	125	4	0.968	104	5	95.1923	98	98.9899	53.5242	0
									gRNA[dsx]#2♂. +/+	130	7	0.946154	105	4	96.1905	96	95.0495		0
									gRNA[dsx]#2♂. +/+	133	7	0.947368	127	7	94.4882	116	96.6667		0
									gRNA[dsx]#2♂. +/+	127	5	0.96063	118	6	94.9153	112	100		0
5 wt♂ X 5 gRNA[dsx]#2/+♀	496	99.2	87.3239	459	92.5403	399	8.93246	80.4435	gRNA[dsx]#2♀/+	95	3	0.968421	101	6	94.0594	91	95.7895	50.1253	0
5 wt♂ X 5 gRNA[dsx]#2/+♀	484	96.8	85.2113	449	92.7686	403	6.01336	83.2645	gRNA[dsx]#2♀/+	98	2	0.979592	95	5	94.7368	90	100	50.1241	0
5 wt♂ X 5 gRNA[dsx]#2/+♀	392	78.4	69.0141	355	90.5612	312	7.60563	79.5918	gRNA[dsx]#2♀/+	75	3	0.96	80	3	96.25	74	96.1039	48.3974	0
									gRNA[dsx]#2♀. +/+	113	5	0.955752	109	5	95.4128	98	94.2308		0
									gRNA[dsx]#2♀. +/+	110	4	0.963636	119	8	93.2773	107	96.3964		0
									gRNA[dsx]#2♀. +/+	84	5	0.940476	89	5	94.382	80	95.2381		0
5 gRNA[dsx]#3/+♂ X 5 wt♀	480	96	84.507	433	90.2083	385	7.3903	80.2083	gRNA[dsx]#3♂/+	117	6	0.948718	88	3	96.5909	81	95.2941	54.2857	0
5 gRNA[dsx]#3/+♂ X 5 wt♀	577	115.4	101.585	538	93.2409	475	8.73606	82.3224	gRNA[dsx]#3♂/+	119	4	0.966387	116	4	96.5517	110	98.2143	49.8947	0
5 gRNA[dsx]#3/+♂ X 5 wt♀	528	105.6	92.9577	478	90.5303	419	8.159	79.3561	gRNA[dsx]#3♂/+	109	5	0.954128	102	5	95.098	95	97.9381	49.8807	0
									gRNA[dsx]#3♂. +/+	101	3	0.970297	95	4	95.7895	88	96.7033		0
									gRNA[dsx]#3♂. +/+	125	3	0.976	131	5	96.1832	124	98.4127		0
									gRNA[dsx]#3♂. +/+	110	5	0.954545	118	5	95.7627	109	96.4602		0
5 wt♂ X 5 gRNA[dsx]#3/+♀	427	85.4	75.1761	402	94.1452	350	9.20398	81.9672	gRNA[dsx]#3♀/+	86	5	0.94186	91	4	95.6044	86	98.8506	50	0
5 wt♂ X 5 gRNA[dsx]#3/+♀	499	99.8	87.8521	461	92.3848	413	5.20607	82.7655	gRNA[dsx]#3♀/+	107	5	0.953271	118	8	93.2203	110	100	49.8789	0
5 wt♂ X 5 gRNA[dsx]#3/+♀	478	95.6	84.1549	427	89.3305	379	6.79157	79.2887	gRNA[dsx]#3♀/+	95	4	0.957895	103	6	94.1748	93	95.8763	50.9235	0
									gRNA[dsx]#3♀. +/+	97	3	0.969072	91	3	96.7033	88	100		0
									gRNA[dsx]#3♀. +/+	108	4	0.962963	104	7	93.2692	95	97.9381		0
									gRNA[dsx]#3♀. +/+	106	4	0.962264	94	5	94.6809	86	96.6292		0
5 gRNA[dsx]#1/+♂ X 5 nup50-Cas9/nup50-Cas9♀	481	96.2	84.6831	430	89.3971	340	8.93204	70.6861	gRNA[dsx]#1♂/+;Cas9♀/+	98	5	0.94898	0	0		0		52.6471	103	29	0.281553	74	71.8447	40	54.0541	51	1.275	1.12236	0	0	493	86.7958	450	91.2779
5 gRNA[dsx]#1/+♂ X 5 nup50-Cas9/nup50-Cas9♀	398	79.6	70.0704	349	87.6884	280	9.4382	70.3518	gRNA[dsx]#1♂/+;Cas9♀/+	92	3	0.967391	0	0		0		58.2143	76	15	0.197368	61	80.2632	29	47.541	8	0.275862	0.242836	0	0	513	90.3169	434	84.6004
5 gRNA[dsx]#1/+♂ X 5 nup50-Cas9/nup50-Cas9♀	453	90.6	79.7535	404	89.1832	315	11.499	69.5364	gRNA[dsx]#1♂/+;Cas9♀/+	88	4	0.954545	0	0		0		50.7937	80	19	0.2375	61	76.25	31	50.8197	37	1.19355	1.05066	0	0	437	76.9366	387	88.5584
									gRNA[dsx]#1♂. +/+;Cas9♀/+	91	5	0.945055	92	5	94.5652	84	96.5517
									gRNA[dsx]#1♂. +/+;Cas9♀/+	78	4	0.948718	61	5	91.8033	53	94.6429
									gRNA[dsx]#1♂. +/+;Cas9♀/+	83	7	0.915663	97	3	96.9072	90	95.7447
5 Nup50-Cas9/Nup50-Cas9♂ X 5 gRNA[dsx]#1/+♀	429	85.8	75.5282	366	85.3147	298	10.1877	69.4639	gRNA[dsx]#1♀/+;Cas9♂/+	84	5	0.940476	0	0		0		53.0201	85	18	0.211765	67	78.8235	37	55.2239	7	0.189189	0.16654	0	0	586	103.169	519	88.5666
5 Nup50-Cas9/Nup50-Cas9♂ X 5 gRNA[dsx]#1/+♀	461	92.2	81.162	385	83.5141	314	8.96686	68.1128	gRNA[dsx]#1♀/+;Cas9♂/+	86	3	0.965116	0	0		0		55.0955	79	14	0.177215	65	82.2785	33	50.7692	19	0.575758	0.506829	0	0	483	85.0352	445	92.1325
5 Nup50-Cas9/Nup50-Cas9♂ X 5 gRNA[dsx]#1/+♀	513	102.6	90.3169	463	90.2534	354	17.5214	69.0058	gRNA[dsx]#1♀/+;Cas9♂/+	98	3	0.969388	0	0		0		53.3898	91	15	0.164835	76	83.5165	36	47.3684	25	0.694444	0.611307	0	0	526	92.6056	480	91.2548
									gRNA[dsx]#1♀. +/+;Cas9♂/+	82	3	0.963415	77	4	94.8052	73	100
									gRNA[dsx]#1♀. +/+;Cas9♂/+	94	4	0.957447	80	4	95	75	98.6842
									gRNA[dsx]#1♀. +/+;Cas9♂/+	99	5	0.949495	93	4	95.6989	86	96.6292
5 gRNA[dsx]#2/+♂ X 5 nup50-Cas9/nup50-Cas9♀	533	106.6	93.838	469	87.9925	377	9.03491	70.7317	gRNA[dsx]#2♂/+;Cas9♀/+	113	6	0.946903	0	0		0		51.7241	106	25	0.235849	81	76.4151	43	53.0864	22	0.511628	0.450377	0	0	505	88.9085	461	91.2871
5 gRNA[dsx]#2/+♂ X 5 nup50-Cas9/nup50-Cas9♀	520	104	91.5493	438	84.2308	371	6.28272	71.3462	gRNA[dsx]#2♂/+;Cas9♀/+	88	5	0.943182	0	0		0		56.6038	69	16	0.231884	53	76.8116	26	49.0566	25	0.961538	0.846425	0	0	466	82.0423	432	92.7039
5 gRNA[dsx]#2/+♂ X 5 nup50-Cas9/nup50-Cas9♀	417	83.4	73.4155	353	84.6523	282	9.30233	67.6259	gRNA[dsx]#2♂/+;Cas9♀/+	85	3	0.964706	0	0		0		51.0638	81	12	0.148148	69	85.1852	31	44.9275	30	0.967742	0.851886	0	0	495	87.1479	426	86.0606
									gRNA[dsx]#2♂. +/+;Cas9♀/+	94	6	0.93617	112	11	90.1786	100	99.0099
									gRNA[dsx]#2♂. +/+;Cas9♀/+	131	4	0.969466	114	6	94.7368	103	95.3704
									gRNA[dsx]#2♂. +/+;Cas9♀/+	65	3	0.953846	74	5	93.2432	64	92.7536
5 Nup50-Cas9/Nup50-Cas9♂ X 5 gRNA[dsx]#2/+♀	522	104.4	91.9014	461	88.3142	344	18.7364	65.9004	gRNA[dsx]#2♀/+;Cas9♂/+	95	3	0.968421	0	0		0		50	101	19	0.188119	82	81.1881	37	45.122	52	1.40541	1.23715	0	0	521	91.7254	488	93.666
5 Nup50-Cas9/Nup50-Cas9♂ X 5 gRNA[dsx]#2/+♀	413	82.6	72.7113	367	88.862	305	4.89978	73.8499	gRNA[dsx]#2♀/+;Cas9♂/+	86	7	0.918605	0	0		0		50.1639	96	20	0.208333	76	79.1667	32	42.1053	29	0.90625	0.797755	0	0	499	87.8521	454	90.982
5 Nup50-Cas9/Nup50-Cas9♂ X 5 gRNA[dsx]#2/+♀	464	92.8	81.6901	404	87.069	320	12.1127	68.9655	gRNA[dsx]#2♀/+;Cas9♂/+	96	5	0.947917	0	0		0		52.5	105	19	0.180952	86	81.9048	43	50	47	1.09302	0.962168	0	0	437	76.9366	401	91.762
									gRNA[dsx]#2♀. +/+;Cas9♂/+	85	5	0.941176	94	4	95.7447	85	94.4444
									gRNA[dsx]#2♀. +/+;Cas9♂/+	81	7	0.91358	82	6	92.6829	73	96.0526
									gRNA[dsx]#2♀. +/+;Cas9♂/+	84	7	0.916667	76	10	86.8421	62	93.9394
5 gRNA[dsx]#3/+♂ X 5 nup50-Cas9/nup50-Cas9♀	453	90.6	79.7535	414	91.3907	326	10.6236	71.9647	gRNA[dsx]#3♂/+;Cas9♀/+	103	6	0.941748	0	0		0		57.9755	88	23	0.261364	65	73.8636	30	46.1538	39	1.3	1.14437	0	0	518	91.1972	452	87.2587
5 gRNA[dsx]#3/+♂ X 5 nup50-Cas9/nup50-Cas9♀	398	79.6	70.0704	360	90.4523	293	3.71747	73.6181	gRNA[dsx]#3♂/+;Cas9♀/+	82	10	0.878049	0	0		0		53.2423	76	27	0.355263	49	64.4737	28	57.1429	24	0.857143	0.754527	0	0	533	93.838	476	89.3058
5 gRNA[dsx]#3/+♂ X 5 nup50-Cas9/nup50-Cas9♀	412	82.4	72.5352	367	89.0777	285	6.90377	69.1748	gRNA[dsx]#3♂/+;Cas9♀/+	87	5	0.942529	0	0		0		59.2982	73	36	0.493151	37	50.6849	19	51.3514	33	1.73684	1.52891	0	0	498	87.6761	449	90.1606
									gRNA[dsx]#3♂. +/+;Cas9♀/+	96	4	0.958333	81	9	88.8889	70	97.2222		0
									gRNA[dsx]#3♂. +/+;Cas9♀/+	89	5	0.94382	93	5	94.6237	88	100
									gRNA[dsx]#3♂. +/+;Cas9♀/+	90	3	0.966667	84	5	94.0476	76	96.2025
5 Nup50-Cas9/Nup50-Cas9♂ X 5 gRNA[dsx]#3/+♀	487	97.4	85.7394	429	88.0903	336	14.4279	68.9938	gRNA[dsx]#3♀/+;Cas9♂/+	98	4	0.959184	0	0		0		54.7619	83	25	0.301205	58	69.8795	32	55.1724	21	0.65625	0.577685	0	0	483	85.0352	407	0.84265
5 Nup50-Cas9/Nup50-Cas9♂ X 5 gRNA[dsx]#3/+♀	408	81.6	71.831	346	84.8039	265	9.32755	64.951	gRNA[dsx]#3♀/+;Cas9♂/+	70	3	0.957143	0	0		0		50.1887	85	26	0.305882	59	69.4118	31	52.5424	48	1.54839	1.36302	0	0	450	79.2254	411	0.913333
5 Nup50-Cas9/Nup50-Cas9♂ X 5 gRNA[dsx]#3/+♀	485	97	85.3873	430	88.6598	316	17.5644	65.1546	gRNA[dsx]#3♀/+;Cas9♂/+	98	8	0.918367	0	0		0		53.481	90	24	0.266667	66	73.3333	39	59.0909	25	0.641026	0.564283	0	0	473	83.2746	415	0.877378
									gRNA[dsx]#3♀. +/+;Cas9♂/+	94	4	0.957447	96	2	97.9167	94	100
									gRNA[dsx]#3♀. +/+;Cas9♂/+	70	4	0.942857	78	5	93.5897	70	95.8904
									gRNA[dsx]#3♀. +/+;Cas9♂/+	82	3	0.963415	85	4	95.2941	78	96.2963
5 wt♂ X 5 gRNA[ix]#2♀	446	89.2	78.5211	414	92.8251	330	17.1498	73.991	gRNA[ix]#2♀/+	88	3	0.965909	78	3	96.1538	73	97.3333	52.1212	0
5 wt♂ X 5 gRNA[ix]#2♀	428	85.6	75.3521	384	89.7196	306	14.5833	71.4953	gRNA[ix]#2♀/+	85	7	0.917647	76	6	92.1053	65	92.8571	52.2876	0
									gRNA[ix]#2♀. +/+	108	5	0.953704	106	5	95.283	98	97.0297		0
									gRNA[ix]#2♀. +/+	92	5	0.945652	85	2	97.6471	80	96.3855		0
									gRNA[ix]#2♀. +/+	86	4	0.953488	81	5	93.8272	72	94.7368		0
5 gRNA[ix]#3♂ X 5 wt♀	425	85	74.8239	405	95.2941	335	13.8272	78.8235	gRNA[ix]#3♂/+	87	3	0.965517	91	4	95.6044	85	97.7011	48.9552	0
5 gRNA[ix]#3♂ X 5 wt♀	472	94.4	83.0986	446	94.4915	360	15.4709	76.2712	gRNA[ix]#3♂/+	96	6	0.9375	94	5	94.6809	82	92.1348	49.1667	0
5 gRNA[ix]#3♂ X 5 wt♀	557	111.4	98.0634	487	87.4327	426	6.3655	76.4811	gRNA[ix]#3♂/+	111	4	0.963964	104	7	93.2692	95	97.9381	51.8779	0
									gRNA[ix]#3♂. +/+	83	3	0.963855	88	4	95.4545	82	97.619		0
									gRNA[ix]#3♂. +/+	89	2	0.977528	98	4	95.9184	92	97.8723		0
									gRNA[ix]#3♂. +/+	125	11	0.912	116	8	93.1034	104	96.2963		0
5 wt♂ X 5 gRNA[ix]#3♀	449	89.8	79.0493	425	94.6548	381	4	84.8552	gRNA[ix]#3♀/+	102	7	0.931373	94	5	94.6809	86	96.6292	53.5433	0
5 wt♂ X 5 gRNA[ix]#3♀	491	98.2	86.4437	465	94.7047	383	12.6882	78.0041	gRNA[ix]#3♀/+	98	11	0.887755	103	3	97.0874	94	94	48.564	0
5 wt♂ X 5 gRNA[ix]#3♀	580	116	102.113	557	96.0345	461	10.772	79.4828	gRNA[ix]#3♀/+	133	8	0.93985	119	7	94.1176	109	97.3214	49.8915	0
									gRNA[ix]#3♀. +/+	115	6	0.947826	97	9	90.7216	82	93.1818		0
									gRNA[ix]#3♀. +/+	104	5	0.951923	101	4	96.0396	94	96.9072		0
									gRNA[ix]#3♀. +/+	116	11	0.905172	129	10	92.2481	110	92.437		0
5 gRNA[ix]#1/+♂ X 5 nup50-Cas9/nup50-Cas9♀	357	71.4	62.8521	299	83.7535	262	3.68764	73.3894	gRNA[ix]#1♂/+;Cas9♀/+	75	5	0.933333	0	0		0		50.7634	69	10	0.144928	59	85.5072	30	50.8475	2139	71.3	62.7641	1873	87.5643	457	80.4577	421	92.1225
5 gRNA[ix]#1/+♂ X 5 nup50-Cas9/nup50-Cas9♀	565	113	99.4718	488	86.3717	432	8.99183	76.4602	gRNA[ix]#1♂/+;Cas9♀/+	108	3	0.972222	0	0		0		48.6111	113	12	0.106195	101	89.3805	63	62.3762	3763	59.7302	52.5794	3215	85.4372	503	88.5563	459	91.2525
5 gRNA[ix]#1/+♂ X 5 nup50-Cas9/nup50-Cas9♀	512	102.4	90.1408	433	84.5703	337	17.3267	65.8203	gRNA[ix]#1♂/+;Cas9♀/+	90	6	0.933333	0	0		0		53.1157	89	14	0.157303	75	84.2697	45	60	3020	67.1111	59.0767	2612	86.4901	528	92.9577	484	91.6667
									gRNA[ix]#1♂. +/+;Cas9♀/+	65	2	0.969231	73	3	95.8904	68	97.1429
									gRNA[ix]#1♂. +/+;Cas9♀/+	109	4	0.963303	125	4	96.8	117	96.6942
									gRNA[ix]#1♂. +/+;Cas9♀/+	98	3	0.969388	86	3	96.5116	81	97.5904
5 nup50-Cas9/nup50-Cas9♂ X 5 gRNA[ix]#1/+♀	505	101	88.9085	458	90.6931	397	6.28019	78.6139	gRNA[ix]#1♀/+;Cas9♂/+	114	12	0.894737	0	0		0		51.1335	96	15	0.15625	81	84.375	47	58.0247	3476	73.9574	65.1034	3107	89.3843	553	97.3592	487	88.0651
5 nup50-Cas9/nup50-Cas9♂ X 5 gRNA[ix]#1/+♀	554	110.8	97.5352	486	87.7256	372	24.4444	67.148	gRNA[ix]#1♀/+;Cas9♂/+	90	4	0.955556	0	0		0		53.2258	87	16	0.183908	71	81.6092	40	56.338	3162	79.05	69.5863	2528	79.9494	516	90.8451	472	91.4729
5 nup50-Cas9/nup50-Cas9♂ X 5 gRNA[ix]#1/+♀	507	101.4	89.2606	442	87.1795	375	7.90191	73.9645	gRNA[ix]#1♀/+;Cas9♂/+	103	7	0.932039	0	0		0		53.3333	91	19	0.208791	72	79.1209	42	58.3333	2778	66.1429	58.2243	2121	76.3499	437	76.9366	369	84.4394
									gRNA[ix]#1♀. +/+;Cas9♂/+	105	4	0.961905	117	4	96.5812	110	97.3451
									gRNA[ix]#1♀. +/+;Cas9♂/+	115	3	0.973913	106	3	97.1698	101	98.0583
									gRNA[ix]#1♀. +/+;Cas9♂/+	110	6	0.945455	109	6	94.4954	102	99.0291
5 gRNA[ix]#2/+♂ X 5 nup50-Cas9/nup50-Cas9♀	472	94.4	83.0986	387	81.9915	320	9.79021	67.7966	gRNA[ix]#2♂/+;Cas9♀/+	82	4	0.95122	0	0		0		53.4375	90	15	0.166667	75	83.3333	45	60	2572	57.1556	50.313	1967	76.4774	556	97.8873	477	85.7914
5 gRNA[ix]#2/+♂ X 5 nup50-Cas9/nup50-Cas9♀	443	88.6	77.993	369	83.2957	305	10.9827	68.8488	gRNA[ix]#2♂/+;Cas9♀/+	79	4	0.949367	0	0		0		52.1311	83	17	0.204819	66	79.5181	37	56.0606	2401	64.8919	57.1231	1981	82.5073	452	79.5775	416	92.0354
5 gRNA[ix]#2/+♂ X 5 nup50-Cas9/nup50-Cas9♀	480	96	84.507	425	88.5417	331	14.4186	68.9583	gRNA[ix]#2♂/+;Cas9♀/+	104	7	0.932692	0	0		0		51.6616	108	21	0.194444	87	80.5556	44	50.5747	3015	68.5227	60.3193	2510	83.2504	428	75.3521	365	85.2804
									gRNA[ix]#2♂. +/+;Cas9♀/+	96	3	0.96875	77	3	96.1039	92	124.324
									gRNA[ix]#2♂. +/+;Cas9♀/+	86	2	0.976744	83	3	96.3855	78	97.5
									gRNA[ix]#2♂. +/+;Cas9♀/+	77	3	0.961039	74	1	98.6486	70	95.8904
5 nup50-Cas9/nup50-Cas9♂ X 5 gRNA[ix]#2/+♀	511	102.2	89.9648	451	88.2583	375	#DIV/0!	73.3855	gRNA[ix]#2♀/+;Cas9♂/+	115	6	0.947826	0	0		0		51.2	119	17	0.142857	102	85.7143	49	48.0392	3578	73.0204	64.2785	3143	87.8424	418	73.5915	360	86.1244
5 nup50-Cas9/nup50-Cas9♂ X 5 gRNA[ix]#2/+♀	438	87.6	77.1127	380	86.758	302	13.0435	68.9498	gRNA[ix]#2♀/+;Cas9♂/+	85	5	0.941176	0	0		0		50.9934	82	10	0.121951	72	87.8049	45	62.5	3152	70.0444	61.6588	2686	85.2157	503	88.5563	461	91.6501
5 nup50-Cas9/nup50-Cas9♂ X 5 gRNA[ix]#2/+♀	472	94.4	83.0986	422	89.4068	341	11.9792	72.2458	gRNA[ix]#2♀/+;Cas9♂/+	93	5	0.946237	0	0		0		52.7859	88	14	0.159091	74	84.0909	42	56.7568	3150	75	66.0211	2524	80.127	572	100.704	539	94.2308
									gRNA[ix]#2♀. +/+;Cas9♂/+	89	6	0.932584	86	5	94.186	78	96.2963
									gRNA[ix]#2♀. +/+;Cas9♂/+	78	4	0.948718	81	5	93.8272	75	98.6842
									gRNA[ix]#2♀. +/+;Cas9♂/+	101	9	0.910891	94	7	92.5532	84	96.5517
5 gRNA[ix]#3/+♂ X 5 nup50-Cas9/nup50-Cas9♀	578	115.6	101.761	491	84.9481	400	15.3086	69.2042	gRNA[ix]#3♂/+;Cas9♀/+	98	5	0.94898	0	0		0		48.5	105	17	0.161905	88	83.8095	48	54.5455	2884	60.0833	52.8903	2472	85.7143	455	80.1056	407	89.4505
5 gRNA[ix]#3/+♂ X 5 nup50-Cas9/nup50-Cas9♀	539	107.8	94.8944	450	83.4879	347	15.4709	64.3785	gRNA[ix]#3♂/+;Cas9♀/+	92	4	0.956522	0	0		0		53.0259	95	22	0.231579	73	76.8421	46	63.0137	2528	54.9565	48.3772	2063	81.606	463	81.5141	399	86.1771
5 gRNA[ix]#3/+♂ X 5 nup50-Cas9/nup50-Cas9♀	459	91.8	80.8099	385	83.878	293	12.5257	63.8344	gRNA[ix]#3♂/+;Cas9♀/+	85	5	0.941176	0	0		0		53.9249	76	17	0.223684	59	77.6316	39	66.1017	2694	69.0769	60.8072	2111	78.3593	529	93.1338	474	89.603
									gRNA[ix]#3♂. +/+;Cas9♀/+	105	4	0.961905	121	3	97.5207	112	94.9153
									gRNA[ix]#3♂. +/+;Cas9♀/+	101	5	0.950495	93	3	96.7742	85	94.4444
									gRNA[ix]#3♂. +/+;Cas9♀/+	82	4	0.95122	81	5	93.8272	76	100
5 nup50-Cas9/nup50-Cas9♂ X 5 gRNA[ix]#3/+♀	429	85.8	75.5282	353	82.2844	298	5.41176	69.4639	gRNA[ix]#3♀/+;Cas9♂/+	81	9	0.888889	0	0	#DIV/0!	0		50.3356	82	13	0.158537	69	84.1463	46	66.6667	2835	61.6304	54.2521	2420	85.3616	536	94.3662	478	89.1791
5 nup50-Cas9/nup50-Cas9♂ X 5 gRNA[ix]#3/+♀	436	87.2	76.7606	385	88.3028	265	20.4301	60.7798	gRNA[ix]#3♀/+;Cas9♂/+	82	7	0.914634	0	0	#DIV/0!	0		53.5849	69	7	0.101449	62	89.8551	34	54.8387	2516	74	65.1408	2133	84.7774	492	86.6197	453	92.0732
5 nup50-Cas9/nup50-Cas9♂ X 5 gRNA[ix]#3/+♀	548	109.6	96.4789	487	88.8686	387	12.0287	70.6204	gRNA[ix]#3♀/+;Cas9♂/+	106	6	0.943396	0	0	#DIV/0!	0		50.1292	112	17	0.151786	95	84.8214	44	46.3158	2673	60.75	53.4771	2309	86.3823	411	72.3592	368	89.5377
									gRNA[ix]#3♀. +/+;Cas9♂/+	83	5	0.939759	84	5	94.0476	78	98.7342
									gRNA[ix]#3♀. +/+;Cas9♂/+	74	7	0.905405	65	4	93.8462	61	100
									gRNA[ix]#3♀. +/+;Cas9♂/+	99	5	0.949495	103	5	95.1456	96	97.9592
Statistical analysis
Class	♀ blood taking rate	Statistics	Normalized number of laid eggs per ♀ laid	Statistics	Egg Hatching rate	Statistics	Normalized number of eggs per one wt ♀ mated with 5 F1 ♂	Statistics	Statistics	Hatched eggs % by (5 wt ♀ X 5 F1 ♂)	Statistics	Statistics
+/+	95.1613	97.4903	100	93.8967	95.9507	95.491		93.8967			95.491
+/+	98.2759	2.0523	93.1338	5.75985	94.896	0.540189		5.75985			0.540189
+/+	99.0338		88.5563		95.6262
5 nup50-Cas9/nup50-Cas♂ X 5 wt♀			78.8732	88.0282	89.9554	92.6022			88.0282			92.6022
5 nup50-Cas9/nup50-Cas♂ X 5 wt♀			90.669	8.1615	94.3689	2.33471			8.1615			2.33471
5 nup50-Cas9/nup50-Cas♂ X 5 wt♀			94.5423		93.4823
gRNA[dsx]#1♂/+;Cas9♀/+	54.0541	50.9627	1.12236	0.616755	0	0	86.7958	89.1432	89.1432	91.2779	89.3984	89.3984
gRNA[dsx]#1♂/+;Cas9♀/+	47.541	3.23725	0.242836	0.399632	0	0	90.3169	8.73471	8.73471	84.6004	2.78828	2.78828
gRNA[dsx]#1♂/+;Cas9♀/+	50.8197		1.05066		0		76.9366			88.5584
gRNA[dsx]#1♀/+;Cas9♂/+	55.2239		0.16654		0		103.169			88.5666
gRNA[dsx]#1♀/+;Cas9♂/+	50.7692		0.506829		0		85.0352			92.1325
gRNA[dsx]#1♀/+;Cas9♂/+	47.3684	P < 0.0001	0.611307	P < 0.0001	0	P < 0.0001	92.6056	P = 0.4284	P = 0.8591	91.2548	P = 0.0084	P = 0.1327
5 nup50-Cas9/nup50-Cas♂ X 5 wt♀			78.8732	88.0282	89.9554	92.6022			88.0282			92.6022
5 nup50-Cas9/nup50-Cas♂ X 5 wt♀			90.669	8.1615	94.3689	2.33471			8.1615			2.33471
5 nup50-Cas9/nup50-Cas♂ X 5 wt♀			94.5423		93.4823
gRNA[ix]#1♂/+;Cas9♀/+	50.8475	57.6533	62.7641	61.2224	87.5643	84.1959	80.4577	87.8521	89.1432	92.1225	89.8365	89.3984
gRNA[ix]#1♂/+;Cas9♀/+	62.3762	3.91057	52.5794	5.92769	85.4372	4.99325	88.5563	7.74248	8.73471	91.2525	3.01746	2.78828
gRNA[ix]#1♂/+;Cas9♀/+	60		59.0767		86.4901		92.9577			91.6667
gRNA[ix]#1♀/+;Cas9♂/+	58.0247		65.1034		89.3843		97.3592			88.0651
gRNA[ix]#1♀/+;Cas9♂/+	56.338		69.5863		79.9494		90.8451			91.4729
gRNA[ix]#1♀/+;Cas9♂/+	58.3333	P < 0.0001	58.2243	P < 0.0001	76.3499	P = 0.0069	76.9366	P = 0.2759	P = 0.9762	84.4394	P = 0.0169	P = 0.2104
Student t test with equal variance

## Sheet: Supplementary file 1d
Supplementary file 1d. Data from pgSIT genetic cross: dsx, ix and ​​βTub simultaneous gene disruption
Tets group	Egg #	Number of eggs per ♀ laid	Normalized number of laid eggs per ♀ %	Hatched egg #	Hatching rate %	Adult#	Larval death %	egg-to adult survival %	F1 progeny	♂ pupa #	♂ pupal eclosion death	♂ pupa-adult survival %	♀ pupa #	♀ pupal eclosion death#	♀ pupa-adult survival %	Blood taking ♀	♀ blood taking rate	♂ adult %	♀ adult %	⚥#	⚥ pupal eclosion death	Survival ⚥#	⚥ pupal-adult death%	⚥ adult %	⚥ # took blood	⚥ blood taking rate	Eggs by (F1 ⚥ X 50 wt ♂)	Normalized number of laid eggs per ⚥	Hatched eggs by (F1 ⚥ X 50 wt ♂)	F1 ⚥ Fertility = Hatched eggs % by (F1 ⚥ X 50 wt ♂)	Eggs by (50 wt ♀ X 50 F1 ♂)	Hatch eggs by (50 wt ♀ X 50 F1 ♂	F1 ♂ Fertility = Hatched eggs % by (50 wt ♀ X 50 F1 ♂)
50 wt♂ X 50 wt♀	4593	91.86	85.8024	4382	95.4061	3896	6.75491	84.8247	+/+	2024	106	94.7628	2062	84	95.9263	1905	0.963094	49.23	50.77	0											4911	4735	96.4162
50 wt♂ X 50 wt♀	5018	100.36	93.7418	4819	96.0343	4273	6.1631	85.1534	+/+	2329	137	94.1176	2193	112	94.8928	2032	0.976454	51.2989	48.7011	0											4627	4419	95.5046
50 wt♂ X 50 wt♀	4322	86.44	80.7398	4168	96.4368	3446	11.9722	79.7316	+/+	1793	95	94.7016	1876	128	93.177	1662	0.950801	49.2745	50.7255	0											4749	4468	94.083
50 nup50-Cas9/nup50-Cas9♂ X 50 wt♀	4473	89.46	83.5606	4025	89.9844	3484	7.42857	77.8896	Cas9♂/+	1902	117	93.8486	1824	125	93.1469	1602	0.942908	51.2342	48.7658	0											4015	3761	93.6737
50 nup50-Cas9/nup50-Cas9♂ X 50 wt♀	4609	92.18	86.1013	3971	86.1575	3311	9.89675	71.8377	Cas9♂/+	1723	128	92.5711	1855	139	92.5067	1648	0.960373	48.1728	51.8272	0											3982	3557	89.327
50 nup50-Cas9/nup50-Cas9♂ X 50 wt♀	4028	80.56	75.2475	3652	90.6653	3032	9.83023	75.2731	Cas9♂/+	1694	133	92.1488	1599	128	91.995	1419	0.96465	51.4842	48.5158	0											4113	3895	94.6997
50 wt♂ X 50 nup50-Cas9/nup50-Cas9♀	3523	70.46	65.8136	2875	81.6066	2371	11.2696	67.3006	Cas9♀/+	1255	96	92.3506	1296	84	93.5185	1177	0.971122	48.8823	51.1177	0											3874	3289	84.8993
50 wt♂ X 50 nup50-Cas9/nup50-Cas9♀	3619	72.38	67.6069	3028	83.6695	2256	19.2536	62.3377	Cas9♀/+	1298	117	90.9861	1147	72	93.7228	998	0.928372	52.3493	47.6507	0											3799	3347	88.1021
50 wt♂ X 50 nup50-Cas9/nup50-Cas9♀	3184	63.68	59.4807	2763	86.7776	2280	10.4235	71.608	Cas9♀/+	1206	90	92.5373	1269	105	91.7258	1091	0.937285	48.9474	51.0526	0											3515	3192	90.8108
50 gRNA[dsx+ix+βTub]#1♂ X 50 wt♀	4930	98.6	92.0979	4421	89.6755	3616	12.599	73.3469	gRNA[dsx+ix+βTub]#1♂/+	1890	108	94.2857	1974	140	92.9078	1752	0.955289	49.281	50.719	0											4352	3997	91.8428
50 gRNA[dsx+ix+βTub]#1♂ X 50 wt♀	5353	107.06	100	4779	89.277	3837	13.5593	71.6794	gRNA[dsx+ix+βTub]#1♂/+	2013	153	92.3994	2118	141	93.3428	1859	0.940314	48.4754	51.5246	0											3675	3314	90.1769
50 gRNA[dsx+ix+βTub]#1♂ X 50 wt♀	5028	100.56	93.9286	4238	84.288	3473	12.3407	69.0732	gRNA[dsx+ix+βTub]#1♂/+	1914	122	93.6259	1801	120	93.337	1611	0.958358	51.598	48.402	0											4696	4267	90.8646
50 gRNA[dsx+ix+βTub]#2♂ X 50 wt♀	4471	89.42	83.5233	3874	86.6473	3285	8.72483	73.4735	gRNA[dsx+ix+βTub]#2♂/+	1811	132	92.7112	1725	119	93.1014	1548	0.963885	51.1111	48.8889	0											4762	4053	85.1113
50 gRNA[dsx+ix+βTub]#2♂ X 50 wt♀	4874	97.48	91.0517	4317	88.572	3660	9.31202	75.0923	gRNA[dsx+ix+βTub]#2♂/+	1989	119	94.0171	1926	136	92.9387	1707	0.953631	51.0929	48.9071	0											4055	3655	90.1356
50 gRNA[dsx+ix+βTub]#2♂ X 50 wt♀	5199	103.98	97.1231	4526	87.0552	3577	14.4498	68.8017	gRNA[dsx+ix+βTub]#2♂/+	1849	133	92.8069	2023	162	91.9921	1738	0.933907	47.9732	52.0268	0											4370	3851	88.1236
50 gRNA[dsx+ix+βTub]#3♂ X 50 wt♀	4697	93.94	87.7452	4142	88.1839	3548	9.2226	75.5376	gRNA[dsx+ix+βTub]#3♂/+	2014	117	94.1907	1746	95	94.559	1523	0.922471	53.4667	46.5333	0											2983	2653	88.9373
50 gRNA[dsx+ix+βTub]#3♂ X 50 wt♀	4629	92.58	86.4749	4048	87.4487	3327	11.7342	71.873	gRNA[dsx+ix+βTub]#3♂/+	1728	128	92.5926	1845	118	93.6043	1625	0.940938	48.0914	51.9086	0											3517	3072	87.3472
50 gRNA[dsx+ix+βTub]#3♂ X 50 wt♀	4537	90.74	84.7562	3784	83.4031	3138	10.9672	69.1646	gRNA[dsx+ix+βTub]#3♂/+	1647	107	93.5033	1722	124	92.7991	1496	0.93617	49.0758	50.9242	0											3762	3418	90.8559
50 WT ♂ X 50 gRNA[dsx+ix+βTub]#1♀	3870	77.4	72.2959	3167	81.8346	2625	12.5039	67.8295	gRNA[dsx+ix+βTub]#1♀/+	1345	67	95.0186	1426	79	94.46	1256	0.932442	48.6857	51.3143	0											3379	2894	85.6466
50 WT ♂ X 50 gRNA[dsx+ix+βTub]#1♀	3583	71.66	66.9344	3105	86.6592	2564	13.0113	71.5601	gRNA[dsx+ix+βTub]#1♀/+	1319	72	94.5413	1382	65	95.2967	1272	0.965831	48.6349	51.3651	0											2985	2611	87.4707
50 WT ♂ X 50 gRNA[dsx+ix+βTub]#1♀	3075	61.5	57.4444	2624	85.3333	2218	11.6616	72.1301	gRNA[dsx+ix+βTub]#1♀/+	1103	47	95.7389	1215	53	95.6379	1123	0.966437	47.6105	52.3895	0											3018	2685	88.9662
50 WT ♂ X 50 gRNA[dsx+ix+βTub]#2♀	3627	72.54	67.7564	3068	84.5878	2474	13.7549	68.2106	gRNA[dsx+ix+βTub]#2♀/+	1337	84	93.7173	1309	88	93.2773	1168	0.956593	50.6467	49.3533	0											4105	3642	88.7211
50 WT ♂ X 50 gRNA[dsx+ix+βTub]#2♀	4128	82.56	77.1156	3382	81.9283	2846	10.7924	68.9438	gRNA[dsx+ix+βTub]#2♀/+	1556	93	94.0231	1461	78	94.6612	1318	0.953001	51.4055	48.5945	0											3762	3107	82.589
50 WT ♂ X 50 gRNA[dsx+ix+βTub]#2♀	4279	85.58	79.9365	3425	80.0421	2672	16.4672	62.4445	gRNA[dsx+ix+βTub]#2♀/+	1537	108	92.9733	1324	81	93.8822	1179	0.948512	53.4805	46.5195	0											3328	2865	86.0877
50 WT ♂ X 50 gRNA[dsx+ix+βTub]#3♀	4036	80.72	75.397	3384	83.8454	2668	16.0461	66.1051	gRNA[dsx+ix+βTub]#3♀/+	1503	80	94.6773	1338	93	93.0493	1194	0.959036	53.3358	46.6642	0											3415	3007	88.0527
50 WT ♂ X 50 gRNA[dsx+ix+βTub]#3♀	3951	79.02	73.8091	3296	83.4219	2628	15.2913	66.5148	gRNA[dsx+ix+βTub]#3♀/+	1377	84	93.8998	1415	80	94.3463	1286	0.963296	49.2009	50.7991	0											3680	3166	86.0326
50 WT ♂ X 50 gRNA[dsx+ix+βTub]#3♀	4006	80.12	74.8365	3343	83.4498	2621	16.6617	65.4269	gRNA[dsx+ix+βTub]#3♀/+	1408	91	93.5369	1378	74	94.6299	1224	0.93865	50.248	49.752	0											2953	2592	87.7751
50 gRNA[dsx+ix+βTub]#1/gRNA[dsx+ix+βTub]#1♂ X 50 nup50-Cas9/nup50-Cas9♀	3328	66.56	62.1707	2482	74.5793	527	58.9041	15.8353	Cas9♀/+;gRNA[dsx+ix+βTub]#1♂/+	542	41	92.4354	0		0			95.0664	0	478	452	26	94.5607	4.93359	0	0	0	0	0	0	4643	0	0
50 gRNA[dsx+ix+βTub]#1/gRNA[dsx+ix+βTub]#1♂ X 50 nup50-Cas9/nup50-Cas9♀	3013	60.26	56.2862	2357	78.2277	400	61.6886	13.2758	Cas9♀/+;gRNA[dsx+ix+βTub]#1♂/+	418	36	91.3876	0		0			95.5	0	485	467	18	96.2887	4.5	0	0	0	0	0	0	4157	0	0
50 gRNA[dsx+ix+βTub]#1/gRNA[dsx+ix+βTub]#1♂ X 50 nup50-Cas9/nup50-Cas9♀	3752	75.04	70.0915	3135	83.5554	548	63.8915	14.6055	Cas9♀/+;gRNA[dsx+ix+βTub]#1♂/+	568	59	89.6127	0		0			92.8832	0	564	525	39	93.0851	7.11679	0	0	0	0	0	0	5281	293	5.54819
50 gRNA[dsx+ix+βTub]#2/gRNA[dsx+ix+βTub]#2♂ X 50 nup50-Cas9/nup50-Cas9♀	3579	71.58	66.8597	2683	74.9651	556	54.8267	15.5351	Cas9♀/+;gRNA[dsx+ix+βTub]#2♂/+	584	62	89.3836	0		0			93.8849	0	628	594	34	94.586	6.11511	0	0	0	0	0	0	4257	0	0
50 gRNA[dsx+ix+βTub]#2/gRNA[dsx+ix+βTub]#2♂ X 50 nup50-Cas9/nup50-Cas9♀	3875	77.5	72.3893	3116	80.4129	508	65.0513	13.1097	Cas9♀/+;gRNA[dsx+ix+βTub]#2♂/+	562	89	84.1637	0		0			93.1102	0	527	492	35	93.3586	6.88976	0	0	0	0	0	0	3872	0	0
50 gRNA[dsx+ix+βTub]#2/gRNA[dsx+ix+βTub]#2♂ X 50 nup50-Cas9/nup50-Cas9♀	3437	68.74	64.207	2854	83.0375	474	61.8781	13.7911	Cas9♀/+;gRNA[dsx+ix+βTub]#2♂/+	515	67	86.9903	0		0			94.5148	0	573	547	26	95.4625	5.48523	0	0	0	0	0	0	4158	122	2.9341
50 gRNA[dsx+ix+βTub]#3/gRNA[dsx+ix+βTub]#3♂ X 50 nup50-Cas9/nup50-Cas9♀	3625	72.5	67.719	2795	77.1034	596	56.8157	16.4414	Cas9♀/+;gRNA[dsx+ix+βTub]#3♂/+	646	75	88.3901	0		0			95.8054	0	561	536	25	95.5437	4.19463	0	0	0	0	0	0	3977	0	0
50 gRNA[dsx+ix+βTub]#3/gRNA[dsx+ix+βTub]#3♂ X 50 nup50-Cas9/nup50-Cas9♀	3024	60.48	56.4917	2493	82.4405	429	58.0425	14.1865	Cas9♀/+;gRNA[dsx+ix+βTub]#3♂/+	498	95	80.9237	0		0			93.9394	0	548	522	26	95.2555	6.06061	0	0	0	0	0	0	4479	27	0.602813
50 gRNA[dsx+ix+βTub]#3/gRNA[dsx+ix+βTub]#3♂ X 50 nup50-Cas9/nup50-Cas9♀	3761	75.22	70.2597	2986	79.3938	574	62.0228	15.2619	Cas9♀/+;gRNA[dsx+ix+βTub]#3♂/+	627	72	88.5167	0		0			96.6899	0	507	488	19	96.2525	3.3101	0	0	0	0	0	0	4370	0	0
50 nup50-Cas9/nup50-Cas9♂ X 50 gRNA[dsx+ix+βTub]#1/gRNA[dsx+ix+βTub]#1♀	3438	68.76	64.2257	2844	82.7225	1015	24.3319	29.523	Cas9♂/+;gRNA[dsx+ix+βTub]#1♀/+	1110	139	87.4775	0		0			95.665	0	1042	998	44	95.7774	4.33498	7	15.9091	32	4.26997	0	0	4761	0	0
50 nup50-Cas9/nup50-Cas9♂ X 50 gRNA[dsx+ix+βTub]#1/gRNA[dsx+ix+βTub]#1♀	3879	77.58	72.464	3108	80.1237	1063	23.2947	27.404	Cas9♂/+;gRNA[dsx+ix+βTub]#1♀/+	1141	156	86.3278	0		0			92.6623	0	1243	1165	78	93.7249	7.33772	13	16.6667	7	0.502953	0	0	4992	116	2.32372
50 nup50-Cas9/nup50-Cas9♂ X 50 gRNA[dsx+ix+βTub]#1/gRNA[dsx+ix+βTub]#1♀	3991	79.82	74.5563	2983	74.7432	920	34.3279	23.0519	Cas9♂/+;gRNA[dsx+ix+βTub]#1♀/+	983	114	88.4028	0		0			94.4565	0	976	925	51	94.7746	5.54348	11	21.5686	14	1.1888	0	0	4325	63	1.45665
50 nup50-Cas9/nup50-Cas9♂ X 50 gRNA[dsx+ix+βTub]#2/gRNA[dsx+ix+βTub]#2♀	3093	61.86	57.7807	2366	76.4953	966	14.9197	31.2318	Cas9♂/+;gRNA[dsx+ix+βTub]#2♀/+	1052	125	88.1179	0		0			95.9627	0	961	922	39	95.9417	4.03727	9	23.0769	12	1.24541	0	0	5037	97	1.92575
50 nup50-Cas9/nup50-Cas9♂ X 50 gRNA[dsx+ix+βTub]#2/gRNA[dsx+ix+βTub]#2♀	3690	73.8	68.9333	2914	78.9702	940	25.4976	25.4743	Cas9♂/+;gRNA[dsx+ix+βTub]#2♀/+	1019	119	88.3219	0		0			95.7447	0	1152	1112	40	96.5278	4.25532	12	30	24	1.86811	0	0	4025	103	2.55901
50 nup50-Cas9/nup50-Cas9♂ X 50 gRNA[dsx+ix+βTub]#2/gRNA[dsx+ix+βTub]#2♀	2951	59.02	55.128	2515	85.2253	1013	18.8867	34.3273	Cas9♂/+;gRNA[dsx+ix+βTub]#2♀/+	1046	98	90.631	0		0			93.5834	0	994	929	65	93.4608	6.41658	19	29.2308	40	1.96643	0	0	4629	19	0.410456
50 nup50-Cas9/nup50-Cas9 ♂ X 50 gRNA[dsx+ix+βTub]#3/gRNA[dsx+ix+βTub]#3♀	3584	71.68	66.9531	2916	81.3616	1079	16.3237	30.106	Cas9♂/+;gRNA[dsx+ix+βTub]#3♀/+	1168	160	86.3014	0		0			93.4198	0	1272	1201	71	94.4182	6.58017	16	22.5352	33	1.92649	0	0	4469	15	0.335646
50 nup50-Cas9/nup50-Cas9 ♂ X 50 gRNA[dsx+ix+βTub]#3/gRNA[dsx+ix+βTub]#3♀	3268	65.36	61.0499	2693	82.4051	938	24.8422	28.7026	Cas9♂/+;gRNA[dsx+ix+βTub]#3♀/+	1035	144	86.087	0		0			94.9893	0	989	942	47	95.2477	5.01066	9	19.1489	15	1.55676	0	0	4271	0	0
50 nup50-Cas9/nup50-Cas9 ♂ X 50 gRNA[dsx+ix+βTub]#3/gRNA[dsx+ix+βTub]#3♀	3703	74.06	69.1762	2938	79.3411	1058	20.8305	28.5714	Cas9♂/+;gRNA[dsx+ix+βTub]#3♀/+	1117	106	90.5103	0		0			95.5577	0	1209	1162	47	96.1125	4.44234	8	17.0213	17	1.98487	0	0	4075	79	1.93865
Statistical Analysis
F1 progeny	Eggs laid per ♀	Hatching rate	Larval death	Larval death % Stat	egg-to adult survival %	egg-to-adult % Stat	♂ pupa-adult survival	♀ pupa-adult survival	♂ adult %	♂ adult % stat	♀ adult ratio	⚥ pupal-adult death%	⚥ adult ratio %	♀ /⚥ % Stat	⚥ blood taking rate	Eggs laid per ⚥	⚥ Fertility	F1 ♂ Fertility
+/+	85.8024	95.4061	6.75491	8.29673	84.8247	83.2366	94.7628	95.9263	49.23		50.77		0	50.0655				96.4162
+/+	93.7418	96.0343	6.1631	3.19675	85.1534	3.03986	94.1176	94.8928	51.2989		48.7011		0	1.18182				95.5046
+/+	80.7398	96.4368	11.9722		79.7316		94.7016	93.177	49.2745		50.7255		0					94.083
Cas9♂/+	83.5606	89.9844	7.42857		77.8896		93.8486	93.1469	51.2342		48.7658		0					93.6737
Cas9♂/+	86.1013	86.1575	9.89675		71.8377		92.5711	92.5067	48.1728		51.8272		0					89.327
Cas9♂/+	75.2475	90.6653	9.83023		75.2731		92.1488	91.995	51.4842		48.5158		0					94.6997
Cas9♀/+	65.8136	81.6066	11.2696		67.3006		92.3506	93.5185	48.8823		51.1177		0					84.8993
Cas9♀/+	67.6069	83.6695	19.2536		62.3377		90.9861	93.7228	52.3493		47.6507		0					88.1021
Cas9♀/+	59.4807	86.7776	10.4235		71.608		92.5373	91.7258	48.9474		51.0526		0					90.8108
gRNA[dsx+ix+βTub]#1♂/+	92.0979	89.6755	12.599		73.3469		94.2857	92.9078	49.281		50.719		0					91.8428
gRNA[dsx+ix+βTub]#1♂/+	100	89.277	13.5593		71.6794		92.3994	93.3428	48.4754		51.5246		0					90.1769
gRNA[dsx+ix+βTub]#1♂/+	93.9286	84.288	12.3407		69.0732		93.6259	93.337	51.598		48.402		0					90.8646
gRNA[dsx+ix+βTub]#1♀/+	72.2959	81.8346	12.5039		67.8295		95.0186	94.46	48.6857		51.3143		0					85.6466
gRNA[dsx+ix+βTub]#1♀/+	66.9344	86.6592	13.0113		71.5601		94.5413	95.2967	48.6349		51.3651		0					87.4707
gRNA[dsx+ix+βTub]#1♀/+	57.4444	85.3333	11.6616		72.1301		95.7389	95.6379	47.6105		52.3895		0					88.9662
Cas9♀/+;gRNA[dsx+ix+βTub]#1♂/+	62.1707	74.5793	58.9041	61.4947	15.8353	14.5722	92.4354	0	95.0664	94.3722	0	94.5607	4.93359	5.51679	0	0	0	0
Cas9♀/+;gRNA[dsx+ix+βTub]#1♂/+	56.2862	78.2277	61.6886	2.49936	13.2758	1.28009	91.3876	0	95.5	1.30945	0	96.2887	4.5	1.40249	0	0	0	0
Cas9♀/+;gRNA[dsx+ix+βTub]#1♂/+	70.0915	83.5554	63.8915	P<0.0001	14.6055	P<0.0001	89.6127	0	92.8832		0	93.0851	7.11679	P<0.0001	0	0	0	5.54819
Cas9♂/+;gRNA[dsx+ix+βTub]#1♀/+	64.2257	82.7225	24.3319	27.3182	29.523	26.6596	87.4775	0	95.665	94.2613	0	95.7774	4.33498	5.73873	15.9091	4.26997	0	0
Cas9♂/+;gRNA[dsx+ix+βTub]#1♀/+	72.464	80.1237	23.2947	6.09268	27.404	3.29915	86.3278	0	92.6623	1.51087	0	93.7249	7.33772	1.51087	16.6667	0.502953	0	2.32372
Cas9♂/+;gRNA[dsx+ix+βTub]#1♀/+	74.5563	74.7432	34.3279	P<0.0001	23.0519	P<0.0001	88.4028	0	94.4565		0	94.7746	5.54348	P<0.0001	21.5686	1.1888	0	1.45665
Student t test with equal variance

## Sheet: Supplementary file 1e
Supplementary file 1e. Data on female blood feeding assay
	Small (24.5cm x 24.5cm x 24.5cm) cage		Large (60cm x 60cm x 60cm) cage			Small (24.5cm x 24.5cm x 24.5cm) cage
♀ group	Time to bite (max 6000 secs)	Feeding time (max 1000 secs)	Time to bite (max 6000 secs)	Feeding time (max 1000 secs)			Number of ♀/⚥ that bitten a mouse	Time to bite [mean±SD]	P significance vs WT ♀	Feeding time [mean±SD]	P significance
WT ♀	26	101	17	113		WT ♀	30	15.93 ± 5.85		134.03 ± 22.55
WT ♀	14	129	14	162		gRNA[dsx,ix,βTub]#1 ♀	30	16.13 ± 7.38	0.9982	136.80 ± 25.37	0.6431
WT ♀	16	176	9	137		Cas9/Cas9 ♀	30	16.30 ± 7.78	0.9967	144.03 ± 20.76	0.0964
WT ♀	24	104	21	145		pgSIT[♀Cas9] ⚥	2	3339.00 ± 1678.67	< 0.0001	N/A
WT ♀	19	134	12	129		pgSIT[♂Cas9] ⚥	5	3110.20 ± 1384.01	< 0.0001	689.00 ± 26.15	< 0.0001
WT ♀	20	121	14	146
WT ♀	11	124	32	153		Large (60cm x 60cm x 60cm) cage
WT ♀	14	169	16	133			Number of ♀/⚥ that bitten a mouse	Time to bite [mean±SD]	P significance vs WT ♀	Feeding time [mean±SD]	P significance
WT ♀	7	175	45	182		WT ♀	30	22.00 ± 7.69		133.93 ± 20.40
WT ♀	9	167	22	139		gRNA[dsx,ix,βTub]#1 ♀	30	24.17 ± 8.75	0.3229	135.10 ± 23.00	0.8314
WT ♀	17	110	25	97		Cas9/Cas9 ♀	30	23.40 ± 8.83	0.5223	140.37 ± 19.96	0.2423
WT ♀	18	116	30	116		pgSIT[♀Cas9] ⚥	0	N/A		N/A
WT ♀	18	120	28	111		pgSIT[♂Cas9] ⚥	0	N/A		N/A
WT ♀	20	107	22	144
WT ♀	11	175	25	134
WT ♀	11	160	14	153
WT ♀	10	143	20	150
WT ♀	11	123	24	150
WT ♀	20	129	17	99
WT ♀	27	132	19	118
WT ♀	10	127	21	120
WT ♀	20	123	15	143
WT ♀	13	120	37	100
WT ♀	7	153	26	139
WT ♀	19	122	23	131
WT ♀	25	101	15	146
WT ♀	6	130	24	153
WT ♀	19	138	19	147
WT ♀	15	148	26	103
WT ♀	21	144	28	125
gRNA[dsx+ix+βTub]#1/gRNA[dsx+ix+βTub]#1 ♀	15	141	37	111
gRNA[dsx+ix+βTub]#1/gRNA[dsx+ix+βTub]#1 ♀	15	114	24	133
gRNA[dsx+ix+βTub]#1/gRNA[dsx+ix+βTub]#1 ♀	30	164	30	104
gRNA[dsx+ix+βTub]#1/gRNA[dsx+ix+βTub]#1 ♀	30	107	33	104
gRNA[dsx+ix+βTub]#1/gRNA[dsx+ix+βTub]#1 ♀	17	170	17	170
gRNA[dsx+ix+βTub]#1/gRNA[dsx+ix+βTub]#1 ♀	7	103	14	116
gRNA[dsx+ix+βTub]#1/gRNA[dsx+ix+βTub]#1 ♀	12	108	16	134
gRNA[dsx+ix+βTub]#1/gRNA[dsx+ix+βTub]#1 ♀	22	144	29	164
gRNA[dsx+ix+βTub]#1/gRNA[dsx+ix+βTub]#1 ♀	11	176	22	176
gRNA[dsx+ix+βTub]#1/gRNA[dsx+ix+βTub]#1 ♀	8	162	22	130
gRNA[dsx+ix+βTub]#1/gRNA[dsx+ix+βTub]#1 ♀	18	106	25	151
gRNA[dsx+ix+βTub]#1/gRNA[dsx+ix+βTub]#1 ♀	29	148	23	141
gRNA[dsx+ix+βTub]#1/gRNA[dsx+ix+βTub]#1 ♀	11	115	12	107
gRNA[dsx+ix+βTub]#1/gRNA[dsx+ix+βTub]#1 ♀	16	139	33	123
gRNA[dsx+ix+βTub]#1/gRNA[dsx+ix+βTub]#1 ♀	15	155	15	156
gRNA[dsx+ix+βTub]#1/gRNA[dsx+ix+βTub]#1 ♀	9	170	21	169
gRNA[dsx+ix+βTub]#1/gRNA[dsx+ix+βTub]#1 ♀	9	141	21	151
gRNA[dsx+ix+βTub]#1/gRNA[dsx+ix+βTub]#1 ♀	27	101	17	118
gRNA[dsx+ix+βTub]#1/gRNA[dsx+ix+βTub]#1 ♀	21	144	28	120
gRNA[dsx+ix+βTub]#1/gRNA[dsx+ix+βTub]#1 ♀	11	130	24	141
gRNA[dsx+ix+βTub]#1/gRNA[dsx+ix+βTub]#1 ♀	30	105	22	123
gRNA[dsx+ix+βTub]#1/gRNA[dsx+ix+βTub]#1 ♀	10	104	12	114
gRNA[dsx+ix+βTub]#1/gRNA[dsx+ix+βTub]#1 ♀	7	139	35	125
gRNA[dsx+ix+βTub]#1/gRNA[dsx+ix+βTub]#1 ♀	12	164	39	152
gRNA[dsx+ix+βTub]#1/gRNA[dsx+ix+βTub]#1 ♀	19	168	34	119
gRNA[dsx+ix+βTub]#1/gRNA[dsx+ix+βTub]#1 ♀	25	119	10	104
gRNA[dsx+ix+βTub]#1/gRNA[dsx+ix+βTub]#1 ♀	12	104	33	115
gRNA[dsx+ix+βTub]#1/gRNA[dsx+ix+βTub]#1 ♀	14	144	35	176
gRNA[dsx+ix+βTub]#1/gRNA[dsx+ix+βTub]#1 ♀	9	176	33	162
gRNA[dsx+ix+βTub]#1/gRNA[dsx+ix+βTub]#1 ♀	13	143	9	144
Cas9/Cas9 ♀	16	101	28	160
Cas9/Cas9 ♀	20	176	38	172
Cas9/Cas9 ♀	11	167	20	134
Cas9/Cas9 ♀	30	112	39	129
Cas9/Cas9 ♀	12	139	18	141
Cas9/Cas9 ♀	28	161	13	176
Cas9/Cas9 ♀	27	144	24	159
Cas9/Cas9 ♀	16	151	20	121
Cas9/Cas9 ♀	25	127	39	107
Cas9/Cas9 ♀	18	140	11	163
Cas9/Cas9 ♀	22	151	10	130
Cas9/Cas9 ♀	12	132	20	103
Cas9/Cas9 ♀	19	132	11	161
Cas9/Cas9 ♀	30	165	26	126
Cas9/Cas9 ♀	7	154	30	153
Cas9/Cas9 ♀	25	135	36	142
Cas9/Cas9 ♀	9	162	26	156
Cas9/Cas9 ♀	27	118	11	171
Cas9/Cas9 ♀	11	125	15	112
Cas9/Cas9 ♀	8	167	15	144
Cas9/Cas9 ♀	10	155	15	115
Cas9/Cas9 ♀	7	116	36	140
Cas9/Cas9 ♀	8	150	26	154
Cas9/Cas9 ♀	14	119	27	111
Cas9/Cas9 ♀	8	163	29	145
Cas9/Cas9 ♀	10	130	28	141
Cas9/Cas9 ♀	8	163	21	128
Cas9/Cas9 ♀	9	175	17	137
Cas9/Cas9 ♀	25	122	27	130
Cas9/Cas9 ♀	17	169	26	150
pgSIT[♀Cas9] ⚥
pgSIT[♀Cas9] ⚥
pgSIT[♀Cas9] ⚥
pgSIT[♀Cas9] ⚥
pgSIT[♀Cas9] ⚥
pgSIT[♀Cas9] ⚥
pgSIT[♀Cas9] ⚥
pgSIT[♀Cas9] ⚥	2152
pgSIT[♀Cas9] ⚥
pgSIT[♀Cas9] ⚥
pgSIT[♀Cas9] ⚥
pgSIT[♀Cas9] ⚥
pgSIT[♀Cas9] ⚥	4526
pgSIT[♀Cas9] ⚥
pgSIT[♀Cas9] ⚥
pgSIT[♀Cas9] ⚥
pgSIT[♀Cas9] ⚥
pgSIT[♀Cas9] ⚥
pgSIT[♀Cas9] ⚥
pgSIT[♀Cas9] ⚥
pgSIT[♀Cas9] ⚥
pgSIT[♀Cas9] ⚥
pgSIT[♀Cas9] ⚥
pgSIT[♀Cas9] ⚥
pgSIT[♀Cas9] ⚥
pgSIT[♀Cas9] ⚥
pgSIT[♀Cas9] ⚥
pgSIT[♀Cas9] ⚥
pgSIT[♀Cas9] ⚥
pgSIT[♀Cas9] ⚥
pgSIT[♂Cas9] ⚥
pgSIT[♂Cas9] ⚥
pgSIT[♂Cas9] ⚥
pgSIT[♂Cas9] ⚥	2761	677
pgSIT[♂Cas9] ⚥
pgSIT[♂Cas9] ⚥
pgSIT[♂Cas9] ⚥
pgSIT[♂Cas9] ⚥
pgSIT[♂Cas9] ⚥	2215
pgSIT[♂Cas9] ⚥
pgSIT[♂Cas9] ⚥
pgSIT[♂Cas9] ⚥
pgSIT[♂Cas9] ⚥
pgSIT[♂Cas9] ⚥
pgSIT[♂Cas9] ⚥	4029
pgSIT[♂Cas9] ⚥
pgSIT[♂Cas9] ⚥
pgSIT[♂Cas9] ⚥
pgSIT[♂Cas9] ⚥
pgSIT[♂Cas9] ⚥
pgSIT[♂Cas9] ⚥
pgSIT[♂Cas9] ⚥
pgSIT[♂Cas9] ⚥	4982	719
pgSIT[♂Cas9] ⚥
pgSIT[♂Cas9] ⚥
pgSIT[♂Cas9] ⚥	1564	671
pgSIT[♂Cas9] ⚥
pgSIT[♂Cas9] ⚥
pgSIT[♂Cas9] ⚥
pgSIT[♂Cas9] ⚥
	max 6000s

## Sheet: Supplementary file 1f
Supplementary file 1f. Data on flight activity
Time	code	WT♀ #1	WT♀#2	WT♀ #3	WT♀ #4	WT♀ #4	WT♀ #6	WT♀ #7	WT♀ #8	WT♀ #9	WT♀ #10	WT♀ #11	WT♀ #12	WT♀ #13	WT♀ #14	WT♀ #15	WT♀ #16	WT♀ #17	WT♀ #18	WT♀ #19	WT♀ #20	WT♀ #21	WT♀ #22	WT♀ #23	WT♀ #24
0.291667	ZT0	23	1	12	13	17	3	45	1	13	15	16	1	7	18	45	31	13	19	31	16	13	53	13	13
0.333333	ZT1	1	1	2	19	8	4	32	3	33	32	22	4	13	12	13	19	32	13	0	13	34	1	23	14
0.375	ZT2	1	2	3	37	29	28	1	9	19	32	33	7	21	11	54	22	33	34	1	34	43	4	43	8
0.416667	ZT3	0	3	4	3	1	21	0	12	4	1	14	11	1	7	0	13	4	18	14	53	12	5	1	32
0.458333	ZT4	0	41	0	0	0	0	0	2	3	2	5	23	3	13	32	1	34	17	3	2	12	19	1	1
0.5	ZT5	0	0	0	0	0	0	0	1	0	3	0	22	18	0	0	7	34	1	1	2	1	0	0	8
0.541667	ZT6	0	0	0	0	0	0	0	0	0	3	0	0	29	0	0	3	13	0	0	12	0	0	0	0
0.583333	ZT7	0	0	0	0	1	0	0	0	3	0	0	0	0	0	1	0	1	0	1	1	0	0	0	0
0.625	ZT8	0	0	0	0	1	0	1	0	2	0	1	0	1	1	34	0	0	0	0	1	0	0	0	0
0.666667	ZT9	0	0	1	1	0	0	67	21	1	9	3	0	0	12	2	0	0	0	1	0	0	0	0	0
0.708333	ZT10	13	1	1	3	0	1	34	13	17	1	3	1	0	23	0	0	0	21	0	0	0	0	0	0
0.75	ZT11	17	3	1	16	13	3	22	19	19	7	23	34	0	34	1	1	0	12	42	4	0	32	0	0
0.791667	ZT12	0	16	19	12	12	9	11	34	43	2	35	41	1	22	0	1	0	16	12	3	0	23	23	0
0.833333	ZT13	0	19	21	0	7	19	19	32	32	19	21	14	0	16	53	41	0	32	34	43	0	21	32	43
0.875	ZT14	3	22	13	3	11	34	9	0	6	1	0	0	0	1	0	23	0	32	12	21	0	0	0	12
0.916667	ZT15	2	3	0	1	0	32	0	0	1	1	0	0	0	0	0	44	0	0	12	12	0	0	0	11
0.958333	ZT16	5	1	0	0	0	0	0	0	0	0	0	0	0	0	0	1	0	0	0	2	0	0	0	7
1	ZT17	1	0	0	0	0	0	0	0	0	0	0	1	0	0	0	0	0	1	0	0	0	0	0	0
1.04167	ZT18	1	0	0	0	0	0	1	0	0	0	1	3	0	0	0	0	0	1	0	0	0	0	0	0
1.08333	ZT19	9	0	1	0	0	1	3	0	0	0	3	3	4	34	0	9	13	7	1	9	23	23	0	9
1.125	ZT20	9	0	8	0	0	3	3	11	0	19	0	19	0	64	23	1	23	32	3	12	0	13	23	0
1.16667	ZT21	13	0	6	1	11	28	0	32	0	26	0	35	0	13	43	0	21	15	43	12	23	0	12	11
1.20833	ZT22	1	1	9	23	16	21	13	1	3	12	1	53	0	0	23	0	1	13	12	43	0	0	2	45
1.25	ZT23	22	9	23	19	26	9	17	11	49	11	29	12	37	23	0	14	14	7	1	17	12	0	19	12
	sum =	121	123	124	151	153	216	278	202	248	196	210	284	135	304	324	231	236	291	224	312	173	194	192	226
average=	214.5
SD =	62.1744
Time	code	pgSIT♀#1	pgSIT♀#2	pgSIT♀#3	pgSIT♀#4	pgSIT♀#5	pgSIT♀#6	pgSIT♀#7	pgSIT♀#8	pgSIT♀#9	pgSIT♀#10	pgSIT♀#11	pgSIT♀#12	pgSIT♀#13	pgSIT♀#14	pgSIT♀#15	pgSIT♀#16	pgSIT♀#17	pgSIT♀#18	pgSIT♀#19	pgSIT♀#20	pgSIT♀#21	pgSIT♀#22	pgSIT♀#23	pgSIT♀#24
0.291667	ZT0	0	0	0	0	0	0	0	0	0	0	0	0	0	0	0	0	0	0	0	0	0	0	0	0
0.333333	ZT1	0	0	0	0	0	0	0	0	0	0	0	0	0	0	0	0	0	0	0	0	0	0	0	0
0.375	ZT2	0	0	0	0	0	0	0	0	0	0	0	0	0	0	0	0	0	0	0	0	0	0	0	0
0.416667	ZT3	0	0	0	0	0	0	0	0	0	0	0	0	0	0	0	0	0	0	0	0	0	0	0	0
0.458333	ZT4	0	0	0	0	0	0	0	0	0	0	0	0	0	0	0	0	0	0	0	0	0	0	0	0
0.5	ZT5	0	0	0	0	0	0	0	0	0	0	0	0	0	0	0	0	0	0	0	0	0	0	0	0
0.541667	ZT6	0	0	0	0	0	0	0	0	0	0	0	0	0	0	0	0	0	0	0	0	0	0	0	0
0.583333	ZT7	0	0	0	0	0	0	0	0	0	0	0	0	0	0	0	0	0	0	0	0	0	0	0	0
0.625	ZT8	0	0	0	0	0	0	0	0	0	0	0	0	0	0	0	0	0	0	0	0	0	0	0	0
0.666667	ZT9	0	0	0	0	0	0	0	0	0	0	0	0	0	0	0	0	0	0	0	0	0	0	0	0
0.708333	ZT10	0	0	0	0	0	0	0	0	0	0	0	0	0	0	0	0	0	0	0	0	0	0	0	0
0.75	ZT11	0	0	0	0	0	0	0	0	0	0	0	0	0	0	0	0	0	0	0	0	0	0	0	0
0.791667	ZT12	0	0	0	0	0	0	0	0	0	0	0	0	0	0	0	0	0	0	0	0	0	0	0	0
0.833333	ZT13	0	0	0	0	0	0	0	0	0	0	0	0	0	0	0	0	0	0	0	0	0	0	0	0
0.875	ZT14	0	0	0	0	0	0	0	0	0	0	0	0	0	0	0	0	0	0	0	0	0	0	0	0
0.916667	ZT15	0	0	0	0	0	0	0	0	0	0	0	0	0	0	0	0	0	0	0	0	0	0	0	0
0.958333	ZT16	0	0	0	0	0	0	0	0	0	0	0	0	0	0	0	0	0	0	0	0	0	0	0	0
1	ZT17	0	0	0	0	0	0	0	0	0	0	0	0	0	0	0	0	0	0	0	0	0	0	0	0
1.04167	ZT18	0	0	0	0	0	0	0	0	0	0	0	0	0	0	0	0	0	0	0	0	0	0	0	0
1.08333	ZT19	0	0	0	0	0	0	0	0	0	0	0	0	0	0	0	0	0	0	0	0	0	0	0	0
1.125	ZT20	0	0	0	0	0	0	0	0	0	0	0	0	0	0	0	0	0	0	0	0	0	0	0	0
1.16667	ZT21	0	0	0	0	0	0	0	0	0	0	0	0	0	0	0	0	0	0	0	0	0	0	0	0
1.20833	ZT22	0	0	0	0	0	0	0	0	0	0	0	0	0	0	0	0	0	0	0	0	0	0	0	0
1.25	ZT23	0	0	0	0	0	0	0	0	0	0	0	0	0	0	0	0	0	0	0	0	0	0	0	0
	sum =	0	0	0	0	0	0	0	0	0	0	0	0	0	0	0	0	0	0	0	0	0	0	0	0
average=	0
SD =	0
Time	code	WT♂ #1	WT♂ #2	WT♂ #3	WT♂ #4	WT♂ #5	WT♂ #6	WT♂ #7	WT♂ #8	WT♂ #9	WT♂ #10	WT♂ #11	WT♂ #12	WT♂ #13	WT♂ #14	WT♂ #15	WT♂ #6	WT♂ #17	WT♂ #18	WT♂ #19	WT♂ #20	WT♂ #21	WT♂ #22	WT♂ #23	WT♂ #24
0.291667	ZT0	54	13	43	32	7	12	13	12	11	11	43	43	23	12	32	23	5	32	23	23	32	12	32	16
0.333333	ZT1	32	22	32	34	11	32	2	23	32	33	42	22	43	32	32	23	3	15	43	32	13	32	11	23
0.375	ZT2	12	31	13	22	33	2	22	23	1	21	12	11	32	12	11	12	56	23	22	13	56	21	34	34
0.416667	ZT3	0	1	0	11	12	2	33	43	1	19	32	0	0	1	1	34	32	13	1	1	3	23	1	0
0.458333	ZT4	0	0	0	9	0	0	0	0	9	45	0	7	3	33	1	56	16	1	3	1	2	1	15	1
0.5	ZT5	2	0	0	7	1	0	0	0	0	0	0	13	1	3	0	22	23	23	5	3	1	1	5	0
0.541667	ZT6	1	11	0	2	1	0	1	0	0	0	2	0	2	2	0	0	1	0	3	13	0	3	1	0
0.583333	ZT7	3	0	0	13	1	0	0	1	0	0	0	0	3	1	0	3	0	3	6	0	0	0	5	3
0.625	ZT8	4	0	12	0	19	0	1	3	0	0	0	1	0	3	1	7	0	0	0	0	0	0	3	3
0.666667	ZT9	7	0	7	0	23	1	23	12	3	3	0	3	0	0	2	32	0	23	32	32	1	0	0	0
0.708333	ZT10	9	0	9	19	12	3	43	9	2	11	0	0	0	0	3	1	0	33	1	3	3	1	0	0
0.75	ZT11	1	13	11	4	32	0	21	23	19	34	2	0	21	13	0	32	0	0	1	12	23	0	0	2
0.791667	ZT12	13	34	13	1	32	22	13	12	33	12	1	0	51	2	22	22	0	23	21	12	1	0	0	5
0.833333	ZT13	9	43	23	2	21	32	3	1	45	0	2	2	32	1	3	1	9	1	0	0	0	0	0	19
0.875	ZT14	1	32	43	1	18	17	2	0	1	3	1	45	13	1	0	0	12	4	0	2	23	0	3	14
0.916667	ZT15	6	14	13	3	6	9	2	0	0	4	0	23	23	0	1	21	23	3	0	2	2	0	13	5
0.958333	ZT16	43	1	22	3	1	0	0	0	0	5	0	0	3	15	9	1	1	0	0	2	3	0	0	2
1	ZT17	0	0	34	0	5	1	0	3	0	7	0	0	1	8	11	0	0	0	2	18	5	0	0	4
1.04167	ZT18	0	0	9	9	1	0	0	4	2	0	0	0	0	0	0	9	0	0	2	0	4	3	0	1
1.08333	ZT19	0	1	0	13	34	6	0	3	3	0	32	0	0	3	0	15	0	31	6	33	0	2	0	0
1.125	ZT20	14	8	0	1	21	12	32	2	13	0	21	3	32	22	22	22	2	23	32	22	1	1	34	0
1.16667	ZT21	18	23	2	1	19	12	11	19	42	0	18	23	12	7	13	31	34	13	12	18	2	16	43	33
1.20833	ZT22	12	19	1	30	21	8	12	34	19	19	34	43	12	17	45	2	21	2	16	12	34	23	41	25
1.25	ZT23	33	34	3	44	31	7	0	54	28	45	47	14	32	22	13	5	43	35	52	7	21	34	22	56
	sum =	274	300	290	261	362	178	234	281	264	272	289	253	339	210	222	374	281	301	283	261	230	173	263	246
average=	268.375
SD =	48.8189
Time	code	pgSIT♂ #1	pgSIT♂ #2	pgSIT♂ #3	pgSIT♂ #4	pgSIT♂ #5	pgSIT♂ #6	pgSIT♂ #7	pgSIT♂ #8	pgSIT♂ #9	pgSIT♂ #10	pgSIT♂ #11	pgSIT♂ #12	pgSIT♂ #13	pgSIT♂ #14	pgSIT♂ #15	pgSIT♂ #16	pgSIT♂ #17	pgSIT♂ #18	pgSIT♂ #19	pgSIT♂ #20	pgSIT♂ #21	pgSIT♂ #22	pgSIT♂ #23	pgSIT♂ #24
0.291667	ZT0	16	1	12	23	7	33	12	22	45	27	23	3	32	19	9	22	7	23	22	32	6	16	45	24
0.333333	ZT1	23	1	3	3	13	21	13	12	32	23	21	5	14	21	13	34	6	13	3	21	34	3	32	3
0.375	ZT2	1	6	0	5	23	15	16	3	21	12	15	67	23	2	43	53	3	23	0	15	22	4	21	13
0.416667	ZT3	0	0	7	6	3	5	3	8	8	3	31	7	32	4	22	1	2	4	9	13	13	23	3	3
0.458333	ZT4	0	0	0	3	3	3	3	0	2	0	0	0	21	14	1	34	0	3	3	3	13	32	13	9
0.5	ZT5	0	0	0	0	0	8	13	9	0	0	0	3	0	1	0	0	0	1	0	5	3	0	5	19
0.541667	ZT6	2	0	5	0	0	0	1	0	0	3	1	0	0	0	0	2	0	0	0	0	0	0	0	0
0.583333	ZT7	0	0	0	0	0	0	0	3	0	0	0	0	1	0	0	0	0	0	0	0	0	0	3	0
0.625	ZT8	0	0	7	0	0	0	1	0	0	0	0	4	2	2	4	3	0	3	0	3	1	3	0	7
0.666667	ZT9	0	7	6	9	1	16	1	0	1	4	3	3	3	3	3	2	3	0	1	1	3	3	1	0
0.708333	ZT10	13	0	0	3	3	5	2	2	3	3	0	2	3	5	0	3	5	1	3	2	3	1	0	3
0.75	ZT11	3	7	6	1	9	3	3	23	5	1	4	4	5	4	2	0	4	9	0	5	0	2	1	0
0.791667	ZT12	21	9	0	3	15	1	0	0	2	5	3	5	0	1	0	4	1	0	2	0	0	0	0	3
0.833333	ZT13	0	13	0	2	0	0	0	0	0	0	23	0	0	0	2	0	3	0	0	0	0	0	0	0
0.875	ZT14	4	0	3	0	0	0	0	0	0	3	0	0	0	0	0	0	3	0	0	1	0	13	7	8
0.916667	ZT15	0	0	0	0	0	0	0	0	0	0	0	0	0	0	1	5	0	0	4	0	0	0	4	0
0.958333	ZT16	0	0	0	0	0	0	0	0	0	0	0	0	0	0	0	0	0	3	0	1	0	4	0	0
1	ZT17	3	0	0	0	0	0	0	0	0	4	0	0	0	0	1	0	0	0	0	0	0	0	6	0
1.04167	ZT18	0	0	0	0	0	0	0	0	0	0	0	0	0	1	1	6	0	0	5	0	0	5	0	3
1.08333	ZT19	0	0	0	0	0	0	3	0	0	0	12	0	0	0	0	13	0	0	14	1	3	9	3	2
1.125	ZT20	0	23	32	0	21	13	8	11	0	0	3	3	2	2	3	53	2	3	30	3	34	23	2	0
1.16667	ZT21	32	2	12	0	23	2	15	34	22	2	23	2	32	0	4	34	32	2	21	5	5	8	32	0
1.20833	ZT22	3	1	1	11	7	3	1	2	11	9	4	11	23	8	1	1	34	26	9	23	8	7	8	3
1.25	ZT23	22	1	3	32	5	23	14	41	32	3	45	23	2	7	21	6	9	19	13	10	33	11	30	29
	sum =	143	71	97	101	133	151	109	170	184	102	211	142	195	94	131	276	114	133	139	144	181	167	216	129
average=	147.208
SD =	46.6793
group	Same size	Flight actity	P significance	P significance
WT ♀	24	214.50 ± 62.17
pgSIT ♀	24	0 ± 0	P < 0.0001, vs WT ♀
WT ♂	24	268.38 ± 48.82
pgSIT ♂	24	147.21 ± 46.68	P < 0.0001, vs WT ♂	P < 0.0001, vs WT ♀

## Sheet: Supplementary file 1g
Supplementary file 1g. Fitness parameters and longevity
Test group	♀/⚥ took bloodmeal (Y/N)	laid egg #	laid eggs %	Hatched egg #	Egg Hatching %	♂ larva-to-pupa dev. time (days)	♂ pupa-to-adult dev. time (days)	♂ larva-to-adult (days)	♀ larva-to-pupa dev. time (days)	♀ pupa-to-adult dev. time (days)	♀ larva-to-adult (days)		# ♀/⚥ /♂ individual mosquito	Adult ♀/⚥ (escaped from pupa shell) longevity with ♂s (days)	Adult ♀/⚥ (escaped from pupa shell) longevity alone (days)	Adult ♂ longevity with ♀s (days)	Adult ♂ longevity alone (days)
WT	Y	96	70.073	93	96.875	5	2	7	6	2	8		1	12	22	9	35
WT	Y	112	81.7518	110	98.2143	5	2	7	6	2	8		2	58	53	11	26
WT	Y	83	60.5839	79	95.1807	5.5	2	7.5	6.5	2	8.5		3	25	9	17	18
WT	Y	62	45.2555	60	96.7742	5.5	2	7.5	6.5	2	8.5		4	45	65	7	23
WT	Y	90	65.6934	89	98.8889	5.5	2	7.5	6.5	2	8.5		5	37	53	16	8
WT	Y	125	91.2409	121	96.8	5.5	2	7.5	6.5	2	8.5		6	13	58	9	33
WT	Y	103	75.1825	103	100	5.5	2	7.5	6.5	2	8.5		7	43	33	8	3
WT	Y	84	61.3139	82	97.619	6	2	8	6.5	2	8.5		8	33	36	8	12
WT	Y	79	57.6642	73	92.4051	6	2	8	6.5	2	8.5		9	39	73	6	25
WT	Y	112	81.7518	111	99.1071	6	2	8	7	2	9		10	59	45	6	31
WT	Y	91	66.4234	87	95.6044	6	2	8	7	2	9		11	17	24	4	25
WT	Y	68	49.635	65	95.5882	6	2	8	7	2	9		12	3	40	15	30
WT	Y	125	91.2409	121	96.8	6	2	8	7	2	9		13	56	27	14	22
WT	Y	133	97.0803	125	93.985	6	2	8	7	2	9		14	67	58	18	25
WT	Y	107	78.1022	99	92.5234	6.5	2	8.5	7	2	9		15	55	57	8	17
WT	Y	82	59.854	82	100	6.5	2	8.5	7.5	2	9.5		16	26	37	9	19
WT	Y	95	69.3431	91	95.7895	6.5	2	8.5	7.5	2	9.5		17	47	28	18	12
WT	Y	99	72.2628	99	100	6.5	2	8.5	7.5	2	9.5		18	52	6	10	9
WT	Y	119	86.8613	114	95.7983	7	2	9	7.5	2	9.5		19	60	59	18	13
WT	Y	127	92.7007	122	96.063	7	2	9	7.5	2	9.5		20	7	29	7	29
WT	Y	105	76.6423	103	98.0952	5.5	2	7.5	6	2	8		1	44	30	10	21
WT	Y	94	68.6131	92	97.8723	5.5	2	7.5	6	2	8		2	46	16	8	8
WT	Y	117	85.4015	111	94.8718	5.5	2	7.5	6.5	2	8.5		3	45	58	11	15
WT	Y	105	76.6423	102	97.1429	5.5	2	7.5	6.5	2	8.5		4	60	44	12	29
WT	Y	82	59.854	76	92.6829	5.5	2	7.5	6.5	2	8.5		5	22	60	12	11
WT	Y	98	71.5328	95	96.9388	6	2	8	6.5	2	8.5		6	33	65	11	24
WT	Y	71	51.8248	69	97.1831	6	2	8	6.5	2	8.5		7	57	63	15	24
WT	Y	108	78.8321	108	100	6	2	8	6.5	2	8.5		8	2	7	18	29
WT	Y	115	83.9416	112	97.3913	6	2	8	7	2	9		9	60	37	14	28
WT	Y	103	75.1825	99	96.1165	6	2	8	7	2	9		10	59	55	13	5
WT	Y	137	100	131	95.6204	6	2	8	7	2	9		11	5	37	19	24
WT	Y	92	67.1533	90	97.8261	6	2	8	7	2	9		12	66	73	13	12
WT	Y	104	75.9124	101	97.1154	6	2	8	7	2	9		13	52	22	12	22
WT	Y	82	59.854	81	98.7805	6	2	8	7	2	9		14	51	7	17	33
WT	Y	90	65.6934	89	98.8889	6	2	8	7.5	2	9.5		15	17	25	14	30
WT	Y	97	70.8029	94	96.9072	6.5	2	8.5	7.5	2	9.5		16	13	19	12	26
WT	Y	88	64.2336	87	98.8636	6.5	2	8.5	7.5	2	9.5		17	9	31	3	14
WT	Y	81	59.1241	78	96.2963	6.5	2	8.5	7.5	2	9.5		18	34	37	14	28
WT	Y	106	77.3723	100	94.3396	6.5	2	8.5	7.5	2	9.5		19	9	59	9	26
WT	Y	86	62.7737	83	96.5116	7	2	9	7.5	2	9.5		20	42	58	10	2
WT	Y	124	90.5109	119	95.9677	5.5	2	7.5	6	2	8		1	6	54	9	26
WT	Y	85	62.0438	85	100	5.5	2	7.5	6	2	8		2	40	27	15	29
WT	Y	97	70.8029	97	100	5.5	2	7.5	6.5	2	8.5		3	61	67	11	28
WT	Y	107	78.1022	104	97.1963	5.5	2	7.5	6.5	2	8.5		4	24	65	14	30
WT	Y	96	70.073	92	95.8333	5.5	2	7.5	6.5	2	8.5		5	12	14	5	8
WT	Y	82	59.854	80	97.561	5.5	2	7.5	6.5	2	8.5		6	10	38	2	13
WT	Y	109	79.562	106	97.2477	6	2	8	6.5	2	8.5		7	70	46	4	7
WT	Y	115	83.9416	111	96.5217	6	2	8	7	2	9		8	60	18	13	26
WT	Y	119	86.8613	117	98.3193	6	2	8	7	2	9		9	27	3	15	29
WT	Y	91	66.4234	90	98.9011	6	2	8	7	2	9		10	69	63	15	9
WT	Y	76	55.4745	73	96.0526	6	2	8	7	2	9		11	54	23	14	27
WT	Y	96	70.073	96	100	6	2	8	7	2	9		12	37	30	16	29
WT	Y	98	71.5328	94	95.9184	6	2	8	7	2	9		13	48	33	14	9
WT	Y	104	75.9124	101	97.1154	6	2	8	7	2	9		14	33	10	16	4
WT	Y	116	84.6715	112	96.5517	6	2	8	7	2	9		15	5	32	13	17
WT	Y	83	60.5839	82	98.7952	6.5	2	8.5	7.5	2	9.5		16	52	65	14	23
WT	Y	87	63.5036	87	100	6.5	2	8.5	7.5	2	9.5		17	68	36	16	25
WT	Y	99	72.2628	94	94.9495	6.5	2	8.5	7.5	2	9.5		18	7	43	9	1
WT	Y	101	73.7226	95	94.0594	6.5	2	8.5	7.5	2	9.5		19	27	27	15	29
WT	Y	110	80.292	103	93.6364	6.5	2	8.5	7.5	2	9.5		20	16	58	13	31
Cas9/Cas9	Y	81	59.1241	74	91.358	5.5	2	7.5	6.5	2	8.5		1	51	28	6	7
Cas9/Cas9	Y	63	45.9854	51	80.9524	5.5	2	7.5	6.5	2	8.5		2	9	7	5	17
Cas9/Cas9	Y	95	69.3431	82	86.3158	5.5	2	7.5	7	2	9		3	22	50	18	35
Cas9/Cas9	Y	107	78.1022	91	85.0467	6	2	8	7	2	9		4	32	13	18	32
Cas9/Cas9	Y	84	61.3139	74	88.0952	6	2	8	7	2	9		5	62	48	4	18
Cas9/Cas9	Y	90	65.6934	81	90	6	2	8	7	2	9		6	27	19	3	19
Cas9/Cas9	Y	101	73.7226	88	87.1287	6	2	8	7.5	2	9.5		7	43	33	18	18
Cas9/Cas9	Y	125	91.2409	113	90.4	6.5	2	8.5	7.5	2	9.5		8	32	50	16	18
Cas9/Cas9	Y	68	49.635	59	86.7647	6.5	2	8.5	7.5	2	9.5		9	51	65	10	19
Cas9/Cas9	Y	79	57.6642	72	91.1392	6.5	2	8.5	7.5	2	9.5		10	20	11	5	17
Cas9/Cas9	Y	77	56.2044	64	83.1169	6.5	2	8.5	7.5	2	9.5		11	3	41	5	5
Cas9/Cas9	Y	87	63.5036	62	71.2644	6.5	2	8.5	7.5	2	9.5		12	12	47	7	20
Cas9/Cas9	Y	92	67.1533	84	91.3043	6.5	2	8.5	7.5	2	9.5		13	41	61	19	35
Cas9/Cas9	Y	89	64.9635	75	84.2697	6.5	2	8.5	7.5	2	9.5		14	58	50	12	13
Cas9/Cas9	Y	73	53.2847	61	83.5616	6.5	2	8.5	7.5	2	9.5		15	24	47	4	14
Cas9/Cas9	Y	104	75.9124	89	85.5769	6.5	2	8.5	7.5	2	9.5		16	42	26	9	14
Cas9/Cas9	Y	96	70.073	85	88.5417	6.5	2	8.5	7.5	2	9.5		17	17	56	14	29
Cas9/Cas9	Y	117	85.4015	106	90.5983	7	2	9	7.5	2	9.5		18	38	43	12	19
Cas9/Cas9	Y	93	67.8832	75	80.6452	7.5	2	9.5	8.5	2	10.5		19	46	37	18	9
Cas9/Cas9	Y	82	59.854	67	81.7073	7.5	2	9.5	8.5	2	10.5		20	26	34	19	13
Cas9/Cas9	Y	115	83.9416	98	85.2174	5.5	2	7.5	6.5	2	8.5		1	8	15	10	20
Cas9/Cas9	Y	92	67.1533	73	79.3478	5.5	2	7.5	6.5	2	8.5		2	55	25	12	20
Cas9/Cas9	Y	105	76.6423	85	80.9524	5.5	2	7.5	7	2	9		3	42	29	7	23
Cas9/Cas9	Y	67	48.9051	51	76.1194	6	2	8	7	2	9		4	22	8	10	20
Cas9/Cas9	Y	82	59.854	62	75.6098	6	2	8	7	2	9		5	25	55	10	6
Cas9/Cas9	Y	79	57.6642	70	88.6076	6	2	8	7	2	9		6	57	13	15	31
Cas9/Cas9	Y	83	60.5839	72	86.747	6	2	8	7	2	9		7	61	5	17	18
Cas9/Cas9	Y	94	68.6131	81	86.1702	6	2	8	7	2	9		8	15	49	11	16
Cas9/Cas9	Y	102	74.4526	94	92.1569	6	2	8	7.5	2	9.5		9	36	43	6	31
Cas9/Cas9	Y	73	53.2847	66	90.411	6.5	2	8.5	7.5	2	9.5		10	46	56	10	10
Cas9/Cas9	Y	44	32.1168	39	88.6364	6.5	2	8.5	7.5	2	9.5		11	6	37	21	3
Cas9/Cas9	Y	82	59.854	66	80.4878	6.5	2	8.5	7.5	2	9.5		12	27	47	6	19
Cas9/Cas9	Y	65	47.4453	57	87.6923	6.5	2	8.5	7.5	2	9.5		13	37	3	7	20
Cas9/Cas9	Y	99	72.2628	79	79.798	7	2	9	7.5	2	9.5		14	11	26	14	23
Cas9/Cas9	Y	86	62.7737	62	72.093	7	2	9	7.5	2	9.5		15	43	51	9	17
Cas9/Cas9	Y	107	78.1022	88	82.243	7	2	9	8.5	2	10.5		16	47	53	7	31
Cas9/Cas9	Y	114	83.2117	79	69.2982	7	2	9	8.5	2	10.5		17	34	33	8	28
Cas9/Cas9	Y	83	60.5839	70	84.3373	7	2	9	8.5	2	10.5		18	52	42	20	21
Cas9/Cas9	Y	80	58.3942	57	71.25	7.5	2	9.5	8.5	2	10.5		19	25	43	4	15
Cas9/Cas9	Y	74	54.0146	54	72.973	7.5	2	9.5	8.5	2	10.5		20	30	22	17	18
Cas9/Cas9	Y	92	67.1533	77	83.6957	5.5	2	7.5	6.5	2	8.5		1	26	23	19	18
Cas9/Cas9	Y	84	61.3139	62	73.8095	5.5	2	7.5	6.5	2	8.5		2	23	47	5	21
Cas9/Cas9	Y	91	66.4234	76	83.5165	6	2	8	7	2	9		3	38	36	9	19
Cas9/Cas9	Y	118	86.1314	104	88.1356	6	2	8	7	2	9		4	40	17	22	21
Cas9/Cas9	Y	72	52.5547	65	90.2778	6	2	8	7	2	9		5	16	48	9	23
Cas9/Cas9	Y	78	56.9343	58	74.359	6	2	8	7	2	9		6	35	32	8	19
Cas9/Cas9	Y	88	64.2336	59	67.0455	6	2	8	7	2	9		7	56	12	16	4
Cas9/Cas9	Y	93	67.8832	78	83.871	6	2	8	7	2	9		8	28	46	22	11
Cas9/Cas9	Y	70	51.0949	54	77.1429	6	2	8	7	2	9		9	12	45	11	4
Cas9/Cas9	Y	62	45.2555	57	91.9355	6	2	8	7.5	2	9.5		10	5	7	2	14
Cas9/Cas9	Y	86	62.7737	75	87.2093	6.5	2	8.5	7.5	2	9.5		11	49	50	10	12
Cas9/Cas9	Y	79	57.6642	60	75.9494	6.5	2	8.5	7.5	2	9.5		12	35	48	13	22
Cas9/Cas9	Y	115	83.9416	93	80.8696	6.5	2	8.5	7.5	2	9.5		13	39	27	8	24
Cas9/Cas9	Y	84	61.3139	71	84.5238	6.5	2	8.5	7.5	2	9.5		14	48	19	13	17
Cas9/Cas9	Y	96	70.073	77	80.2083	6.5	2	8.5	7.5	2	9.5		15	2	48	8	27
Cas9/Cas9	Y	91	66.4234	82	90.1099	6.5	2	8.5	7.5	2	9.5		16	44	43	18	6
Cas9/Cas9	Y	82	59.854	65	79.2683	6.5	2	8.5	7.5	2	9.5		17	65	31	8	7
Cas9/Cas9	Y	69	50.365	53	76.8116	7	2	9	7.5	2	9.5		18	32	1	6	17
Cas9/Cas9	Y	107	78.1022	93	86.9159	7	2	9	8.5	2	10.5		19	23	46	11	26
Cas9/Cas9	Y	80	58.3942	64	80	7.5	2	9.5	8.5	2	10.5		20	58	10	7	28
gRNAs/gRNAs	Y	78	56.9343	68	87.1795	5.5	2	7.5	6.5	2	8.5		1	48	45	11	30
gRNAs/gRNAs	Y	92	67.1533	83	90.2174	5.5	2	7.5	6.5	2	8.5		2	25	29	11	15
gRNAs/gRNAs	Y	86	62.7737	74	86.0465	6	2	8	7	2	9		3	52	14	7	23
gRNAs/gRNAs	Y	107	78.1022	95	88.785	6	2	8	7	2	9		4	32	15	19	29
gRNAs/gRNAs	Y	94	68.6131	67	71.2766	6	2	8	7	2	9		5	7	48	9	9
gRNAs/gRNAs	Y	58	42.3358	43	74.1379	6	2	8	7	2	9		6	27	9	9	22
gRNAs/gRNAs	Y	94	68.6131	69	73.4043	6	2	8	7	2	9		7	42	52	9	10
gRNAs/gRNAs	Y	91	66.4234	82	90.1099	6	2	8	7	2	9		8	27	17	11	12
gRNAs/gRNAs	Y	87	63.5036	75	86.2069	6	2	8	7	2	9		9	15	17	19	29
gRNAs/gRNAs	Y	65	47.4453	44	67.6923	6	2	8	7	2	9		10	57	35	19	34
gRNAs/gRNAs	Y	115	83.9416	96	83.4783	6	2	8	7	2	9		11	42	40	10	19
gRNAs/gRNAs	Y	63	45.9854	50	79.3651	6	2	8	7	2	9		12	32	25	17	2
gRNAs/gRNAs	Y	98	71.5328	83	84.6939	6	2	8	7	2	9		13	38	43	8	8
gRNAs/gRNAs	Y	84	61.3139	67	79.7619	6	2	8	7	2	9		14	36	7	3	26
gRNAs/gRNAs	Y	72	52.5547	63	87.5	6.5	2	8.5	7	2	9		15	38	22	13	9
gRNAs/gRNAs	Y	103	75.1825	79	76.699	6.5	2	8.5	7.5	2	9.5		16	42	12	12	18
gRNAs/gRNAs	Y	85	62.0438	68	80	6.5	2	8.5	7.5	2	9.5		17	42	23	5	27
gRNAs/gRNAs	Y	76	55.4745	56	73.6842	6.5	2	8.5	7.5	2	9.5		18	24	57	9	5
gRNAs/gRNAs	Y	94	68.6131	85	90.4255	6.5	2	8.5	7.5	2	9.5		19	19	37	12	14
gRNAs/gRNAs	Y	109	79.562	94	86.2385	6.5	2	8.5	7.5	2	9.5		20	19	12	3	21
gRNAs/gRNAs	Y	115	83.9416	99	86.087	5.5	2	7.5	6.5	2	8.5		1	56	4	11	25
gRNAs/gRNAs	Y	76	55.4745	68	89.4737	6	2	8	7	1.5	8.5		2	34	42	4	7
gRNAs/gRNAs	Y	98	71.5328	82	83.6735	6	2	8	7	2	9		3	55	28	10	22
gRNAs/gRNAs	Y	37	27.0073	31	83.7838	6	2	8	7	2	9		4	37	55	6	15
gRNAs/gRNAs	Y	126	91.9708	110	87.3016	6	2	8	7	2	9		5	25	37	12	4
gRNAs/gRNAs	Y	104	75.9124	89	85.5769	6	2	8	7	2	9		6	51	47	18	20
gRNAs/gRNAs	Y	86	62.7737	73	84.8837	6	2	8	7	2	9		7	28	43	12	24
gRNAs/gRNAs	Y	94	68.6131	76	80.8511	6	2	8	7	2	9		8	34	15	4	29
gRNAs/gRNAs	Y	62	45.2555	50	80.6452	6	2	8	7	2	9		9	17	27	11	17
gRNAs/gRNAs	Y	83	60.5839	69	83.1325	6	2	8	7	2	9		10	47	27	11	14
gRNAs/gRNAs	Y	95	69.3431	85	89.4737	6	2	8	7	2	9		11	2	28	8	27
gRNAs/gRNAs	Y	108	78.8321	82	75.9259	6	2	8	7	2	9		12	31	28	11	1
gRNAs/gRNAs	Y	84	61.3139	71	84.5238	6	2	8	7	2	9		13	34	26	14	19
gRNAs/gRNAs	Y	99	72.2628	74	74.7475	6	2	8	7	2	9		14	55	15	11	20
gRNAs/gRNAs	Y	93	67.8832	80	86.0215	6.5	2	8.5	7.5	2	9.5		15	41	35	7	8
gRNAs/gRNAs	Y	113	82.4818	96	84.9558	6.5	2	8.5	7.5	2	9.5		16	7	29	15	26
gRNAs/gRNAs	Y	94	68.6131	82	87.234	6.5	2	8.5	7.5	2	9.5		17	62	23	7	25
gRNAs/gRNAs	Y	55	40.146	43	78.1818	6.5	2	8.5	7.5	2	9.5		18	39	57	17	21
gRNAs/gRNAs	Y	89	64.9635	71	79.7753	6.5	2	8.5	7.5	2	9.5		19	31	8	12	21
gRNAs/gRNAs	Y	96	70.073	77	80.2083	6.5	2	8.5	7.5	2	9.5		20	45	33	18	30
gRNAs/gRNAs	Y	87	63.5036	73	83.908	5.5	2	7.5	6.5	2	8.5		1	5	18	11	14
gRNAs/gRNAs	Y	82	59.854	65	79.2683	5.5	2	7.5	6.5	2	8.5		2	11	25	6	26
gRNAs/gRNAs	Y	128	93.4307	103	80.4688	6	2	8	7	2	9		3	42	27	19	25
gRNAs/gRNAs	Y	90	65.6934	79	87.7778	6	2	8	7	2	9		4	47	55	9	5
gRNAs/gRNAs	Y	84	61.3139	68	80.9524	6	2	8	7	2	9		5	28	9	15	19
gRNAs/gRNAs	Y	113	82.4818	94	83.1858	6	2	8	7	2	9		6	38	12	19	4
gRNAs/gRNAs	Y	95	69.3431	67	70.5263	6	2	8	7	2	9		7	57	11	9	30
gRNAs/gRNAs	Y	67	48.9051	58	86.5672	6	2	8	7	2	9		8	55	3	8	23
gRNAs/gRNAs	Y	94	68.6131	81	86.1702	6	2	8	7	2	9		9	61	26	20	28
gRNAs/gRNAs	Y	58	42.3358	45	77.5862	6	2	8	7	2	9		10	43	52	3	3
gRNAs/gRNAs	Y	103	75.1825	92	89.3204	6	2	8	7	2	9		11	35	31	14	9
gRNAs/gRNAs	Y	92	67.1533	78	84.7826	6	2	8	7	2	9		12	56	42	17	31
gRNAs/gRNAs	Y	75	54.7445	55	73.3333	6	2	8	7	2	9		13	22	46	2	28
gRNAs/gRNAs	Y	49	35.7664	36	73.4694	6	2	8	7	2	9		14	6	23	14	17
gRNAs/gRNAs	Y	86	62.7737	73	84.8837	6	2	8	7.5	2	9.5		15	51	39	15	33
gRNAs/gRNAs	Y	96	70.073	79	82.2917	6.5	2	8.5	7.5	2	9.5		16	29	31	13	4
gRNAs/gRNAs	Y	88	64.2336	74	84.0909	6.5	2	8.5	7.5	2	9.5		17	60	43	4	13
gRNAs/gRNAs	Y	109	79.562	88	80.7339	6.5	2	8.5	7.5	2	9.5		18	19	45	13	31
gRNAs/gRNAs	Y	78	56.9343	60	76.9231	6.5	2	8.5	7.5	2	9.5		19	28	34	15	29
gRNAs/gRNAs	Y	91	66.4234	73	80.2198	6.5	2	8.5	7.5	2	9.5		20	5	63	16	32	Adult ♀/⚥ (can not escaped from pupa shell) longevity (days)
gRNAs♂/+;Cas9♀/+	N	0	0	0	-	6	2	8	7	2	9		1	5	19	3	15	1
gRNAs♂/+;Cas9♀/+	N	0	0	0	-	6	2	8	7	2	9		2	7	9	17	22	1
gRNAs♂/+;Cas9♀/+	N	0	0	0	-	6	2	8	7	2	9		3	15	20	4	17	1
gRNAs♂/+;Cas9♀/+	N	0	0	0	-	6.5	2	8.5	7.5	2	9.5		4	18	20	21	26	1
gRNAs♂/+;Cas9♀/+	N	0	0	0	-	6.5	2	8.5	7.5	2	9.5		5	11	15	8	5	1
gRNAs♂/+;Cas9♀/+	N	0	0	0	-	6.5	2	8.5	7.5	2	9.5		6	13	5	9	26	1
gRNAs♂/+;Cas9♀/+	N	0	0	0	-	6.5	2	8.5	7.5	2	9.5		7	15	14	12	26	1
gRNAs♂/+;Cas9♀/+	N	0	0	0	-	6.5	2	8.5	7.5	2	9.5		8	11	13	9	15	1
gRNAs♂/+;Cas9♀/+	N	0	0	0	-	6.5	2	8.5	7.5	2	9.5		9	9	1	9	3	1
gRNAs♂/+;Cas9♀/+	N	0	0	0	-	7	2	9	7.5	2	9.5		10	16	7	14	2	1
gRNAs♂/+;Cas9♀/+	N	0	0	0	-	7	2	9	7.5	2	9.5		11	2	9	9	9	1
gRNAs♂/+;Cas9♀/+	N	0	0	0	-	7	2	9	7.5	2	9.5		12	10	9	5	17	1
gRNAs♂/+;Cas9♀/+	N	0	0	0	-	7	2	9	7.5	2	9.5		13	7	3	3	18	1
gRNAs♂/+;Cas9♀/+	N	0	0	0	-	7	2	9	8	2	10		14	2	15	10	16	1
gRNAs♂/+;Cas9♀/+	N	0	0	0	-	7	2	9	8	2	10		15	4	8	11	3	1
gRNAs♂/+;Cas9♀/+	N	0	0	0	-	7	2	9	8	2	10		16	7	7	12	33	1
gRNAs♂/+;Cas9♀/+	N	0	0	0	-	7.5	2	9.5	8	2	10		17	8	8	20	10	1
gRNAs♂/+;Cas9♀/+	N	0	0	0	-	7.5	2	9.5	8	2	10		18	11	5	10	17	1
gRNAs♂/+;Cas9♀/+	N	0	0	0	-	7.5	2	9.5	8	2	10		19	1	7	20	2	1
gRNAs♂/+;Cas9♀/+	N	0	0	0	-	7.5	2	9.5	8	2.5	10.5		20	9	2	10	25	1
gRNAs♂/+;Cas9♀/+	N	0	0	0	-	6	2	8	7	2	9		1	10	4	11	2	1
gRNAs♂/+;Cas9♀/+	N	0	0	0	-	6	2	8	7	2	9		2	9	7	18	14	1
gRNAs♂/+;Cas9♀/+	N	0	0	0	-	6.5	2	8.5	7.5	2	9.5		3	7	15	3	7	1
gRNAs♂/+;Cas9♀/+	N	0	0	0	-	6.5	2	8.5	7.5	2	9.5		4	4	19	13	31	1
gRNAs♂/+;Cas9♀/+	N	0	0	0	-	6.5	2	8.5	7.5	2	9.5		5	13	5	17	30	1
gRNAs♂/+;Cas9♀/+	N	0	0	0	-	6.5	2	8.5	7.5	2	9.5		6	15	10	7	28	1
gRNAs♂/+;Cas9♀/+	N	0	0	0	-	6.5	2	8.5	7.5	2	9.5		7	15	9	13	29	1
gRNAs♂/+;Cas9♀/+	N	0	0	0	-	7	2	9	7.5	2	9.5		8	3	9	13	33	1
gRNAs♂/+;Cas9♀/+	N	0	0	0	-	7	2	9	7.5	2	9.5		9	6	3	11	8	1
gRNAs♂/+;Cas9♀/+	N	0	0	0	-	7	2	9	7.5	2	9.5		10	16	9	12	19	1
gRNAs♂/+;Cas9♀/+	N	0	0	0	-	7	2	9	7.5	2	9.5		11	17	9	10	2	1
gRNAs♂/+;Cas9♀/+	N	0	0	0	-	7	2	9	7.5	2	9.5		12	11	18	11	28	1
gRNAs♂/+;Cas9♀/+	N	0	0	0	-	7	2	9	7.5	2	9.5		13	12	7	12	15	1
gRNAs♂/+;Cas9♀/+	N	0	0	0	-	7	2	9	7.5	2	9.5		14	9	13	11	25	1
gRNAs♂/+;Cas9♀/+	N	0	0	0	-	7	2	9	8	2	10		15	11	10	17	32	1
gRNAs♂/+;Cas9♀/+	N	0	0	0	-	7	2	9	8	2	10		16	10	2	3	20	1
gRNAs♂/+;Cas9♀/+	N	0	0	0	-	7.5	2	9.5	8	2	10		17	2	14	2	24	1
gRNAs♂/+;Cas9♀/+	N	0	0	0	-	7.5	2	9.5	8	2	10		18	7	15	14	28	1
gRNAs♂/+;Cas9♀/+	N	0	0	0	-	7.5	2	9.5	8	2	10		19	2	5	8	12	1
gRNAs♂/+;Cas9♀/+	N	0	0	0	-	8	2	10	8	2	10		20	9	21	15	2	1
gRNAs♂/+;Cas9♀/+	N	0	0	0	-	6.5	2	8.5	7.5	2	9.5		1	9	11	2	13	1
gRNAs♂/+;Cas9♀/+	N	0	0	0	-	6.5	2	8.5	7.5	2	9.5		2	10	16	17	10	1
gRNAs♂/+;Cas9♀/+	N	0	0	0	-	6.5	2	8.5	7.5	2	9.5		3	2	13	5	22	1
gRNAs♂/+;Cas9♀/+	N	0	0	0	-	6.5	2	8.5	7.5	2	9.5		4	11	4	11	28	1
gRNAs♂/+;Cas9♀/+	N	0	0	0	-	6.5	2	8.5	7.5	2	9.5		5	14	19	11	29	1
gRNAs♂/+;Cas9♀/+	N	0	0	0	-	6.5	2	8.5	7.5	2	9.5		6	9	9	7	4	1
gRNAs♂/+;Cas9♀/+	N	0	0	0	-	6.5	2	8.5	7.5	2	9.5		7	7	2	10	27	1
gRNAs♂/+;Cas9♀/+	N	0	0	0	-	6.5	2	8.5	7.5	2	9.5		8	12	2	4	29	1
gRNAs♂/+;Cas9♀/+	N	0	0	0	-	6.5	2	8.5	7.5	2	9.5		9	15	9	11	26	1
gRNAs♂/+;Cas9♀/+	N	0	0	0	-	6.5	2	8.5	7.5	2	9.5		10	11	7	10	29	1
gRNAs♂/+;Cas9♀/+	N	0	0	0	-	6.5	2	8.5	7.5	2	9.5		11	15	19	9	29	1
gRNAs♂/+;Cas9♀/+	N	0	0	0	-	7	2	9	7.5	2	9.5		12	3	16	3	27	1
gRNAs♂/+;Cas9♀/+	N	0	0	0	-	7	2	9	8	2	10		13	8	13	13	15	1
gRNAs♂/+;Cas9♀/+	N	0	0	0	-	7	2	9	8	2	10		14	12	16	11	9	1
gRNAs♂/+;Cas9♀/+	N	0	0	0	-	7	2	9	8	2	10		15	15	9	10	6	1
gRNAs♂/+;Cas9♀/+	N	0	0	0	-	7.5	2	9.5	8	2	10		16	12	6	4	7	1
gRNAs♂/+;Cas9♀/+	N	0	0	0	-	7.5	2	9.5	8	2	10		17	5	16	12	13	1
gRNAs♂/+;Cas9♀/+	N	0	0	0	-	7.5	2	9.5	8	2	10		18	6	8	16	30	1
gRNAs♂/+;Cas9♀/+	N	0	0	0	-	7.5	2	9.5	8	2	10		19	3	4	17	17	1
gRNAs♂/+;Cas9♀/+	N	0	0	0	-	7.5	2	9.5	8	2	10		20	1	12	10	4	1
gRNAs♀/+;Cas9♂/+	N	0	0	0	-	6.5	2	8.5	7.5	2	9.5		1	14	9	10	20	1
gRNAs♀/+;Cas9♂/+	N	0	0	0	-	6.5	2	8.5	7.5	2	9.5		2	11	11	16	3	1
gRNAs♀/+;Cas9♂/+	N	0	0	0	-	6.5	2	8.5	7.5	2	9.5		3	4	16	11	24	1
gRNAs♀/+;Cas9♂/+	N	0	0	0	-	6.5	2	8.5	7.5	2	9.5		4	8	17	5	5	1
gRNAs♀/+;Cas9♂/+	Y	0	0	0	-	6.5	2	8.5	7.5	2	9.5		5	17	4	11	4	1
gRNAs♀/+;Cas9♂/+	N	0	0	0	-	6.5	2	8.5	7.5	2	9.5		6	6	2	14	27	1
gRNAs♀/+;Cas9♂/+	N	0	0	0	-	6.5	2	8.5	7.5	2	9.5		7	5	11	13	29	1
gRNAs♀/+;Cas9♂/+	Y	0	0	0	-	6.5	2	8.5	7.5	2	9.5		8	11	13	18	25	1
gRNAs♀/+;Cas9♂/+	N	0	0	0	-	6.5	2	8.5	8	2	10		9	18	19	9	34	1
gRNAs♀/+;Cas9♂/+	N	0	0	0	-	6.5	2	8.5	8	2	10		10	3	9	14	3	1
gRNAs♀/+;Cas9♂/+	N	0	0	0	-	7	2	9	8	2	10		11	8	6	10	22	1
gRNAs♀/+;Cas9♂/+	N	0	0	0	-	7	2	9	8	2	10		12	4	20	14	19	1
gRNAs♀/+;Cas9♂/+	N	0	0	0	-	7	2	9	8	2	10		13	11	15	2	6	1
gRNAs♀/+;Cas9♂/+	N	0	0	0	-	7	2	9	8	2	10		14	14	13	4	25	1
gRNAs♀/+;Cas9♂/+	N	0	0	0	-	7	2	9	8	2	10		15	9	7	17	21	1
gRNAs♀/+;Cas9♂/+	Y	0	0	0	-	7.5	2	9.5	8	2	10		16	14	8	10	13	1
gRNAs♀/+;Cas9♂/+	N	0	0	0	-	7.5	2	9.5	8	2	10		17	15	4	6	9	1
gRNAs♀/+;Cas9♂/+	N	0	0	0	-	7.5	2	9.5	8	2	10		18	15	16	13	17	1
gRNAs♀/+;Cas9♂/+	N	0	0	0	-	7.5	2	9.5	8	2	10		19	5	4	4	15	1
gRNAs♀/+;Cas9♂/+	N	0	0	0	-	7.5	2	9.5	8	2	10		20	14	10	7	15	1
gRNAs♀/+;Cas9♂/+	Y	0	0	0	-	6.5	2	8.5	7.5	2	9.5		1	14	2	5	19	1
gRNAs♀/+;Cas9♂/+	N	0	0	0	-	6.5	2	8.5	7.5	2	9.5		2	8	11	10	9	1
gRNAs♀/+;Cas9♂/+	N	0	0	0	-	6.5	2	8.5	7.5	2	9.5		3	3	5	5	25	1
gRNAs♀/+;Cas9♂/+	N	0	0	0	-	6.5	2	8.5	7.5	2	9.5		4	14	19	13	8	1
gRNAs♀/+;Cas9♂/+	N	0	0	0	-	6.5	2	8.5	7.5	2	9.5		5	12	9	6	9	1
gRNAs♀/+;Cas9♂/+	N	0	0	0	-	7	2	9	7.5	2	9.5		6	1	4	21	14	1
gRNAs♀/+;Cas9♂/+	N	0	0	0	-	7	2	9	7.5	2	9.5		7	8	11	5	8	1
gRNAs♀/+;Cas9♂/+	N	0	0	0	-	7	2	9	7.5	2	9.5		8	14	16	14	23	1
gRNAs♀/+;Cas9♂/+	N	0	0	0	-	7	2	9	7.5	2	9.5		9	13	11	11	8	1
gRNAs♀/+;Cas9♂/+	N	0	0	0	-	7	2	9	7.5	2	9.5		10	6	8	12	16	1
gRNAs♀/+;Cas9♂/+	N	0	0	0	-	7	2	9	7.5	2	9.5		11	8	19	5	24	1
gRNAs♀/+;Cas9♂/+	Y	0	0	0	-	7	2	9	8	2	10		12	11	16	13	9	1
gRNAs♀/+;Cas9♂/+	Y	0	0	0	-	7	2	9	8	2	10		13	17	13	13	21	1
gRNAs♀/+;Cas9♂/+	N	0	0	0	-	7	2	9	8	2	10		14	11	3	10	28	1
gRNAs♀/+;Cas9♂/+	N	0	0	0	-	7	2	9	8	2	10		15	19	3	3	15	1
gRNAs♀/+;Cas9♂/+	N	0	0	0	-	7.5	2	9.5	8	2	10		16	15	5	9	24	1
gRNAs♀/+;Cas9♂/+	N	0	0	0	-	7.5	2	9.5	8	2	10		17	10	16	19	28	1
gRNAs♀/+;Cas9♂/+	N	0	0	0	-	7.5	2	9.5	8	2	10		18	5	12	13	20	1
gRNAs♀/+;Cas9♂/+	N	0	0	0	-	7.5	2	9.5	8	2	10		19	1	9	16	28	1
gRNAs♀/+;Cas9♂/+	Y	0	0	0	-	7.5	2	9.5	8	2	10		20	15	17	11	5	1
gRNAs♀/+;Cas9♂/+	N	0	0	0	-	6.5	2	8.5	7	2	9		1	15	16	17	18	1
gRNAs♀/+;Cas9♂/+	N	0	0	0	-	6.5	2	8.5	7	2	9		2	1	8	17	8	1
gRNAs♀/+;Cas9♂/+	N	0	0	0	-	6.5	2	8.5	7.5	2	9.5		3	6	10	9	22	1
gRNAs♀/+;Cas9♂/+	N	0	0	0	-	6.5	2	8.5	7.5	2	9.5		4	1	24	8	26	1
gRNAs♀/+;Cas9♂/+	Y	0	0	0	-	6.5	2	8.5	7.5	2	9.5		5	14	8	7	28	1
gRNAs♀/+;Cas9♂/+	N	0	0	0	-	6.5	2	8.5	7.5	2	9.5		6	13	4	11	26	1
gRNAs♀/+;Cas9♂/+	N	0	0	0	-	6.5	2	8.5	7.5	2	9.5		7	8	9	7	17	1
gRNAs♀/+;Cas9♂/+	N	0	0	0	-	7	2	9	7.5	2	9.5		8	14	19	9	22	1
gRNAs♀/+;Cas9♂/+	N	0	0	0	-	7	2	9	7.5	2	9.5		9	15	11	13	10	1
gRNAs♀/+;Cas9♂/+	N	0	0	0	-	7	2	9	7.5	2	9.5		10	5	17	15	14	1
gRNAs♀/+;Cas9♂/+	N	0	0	0	-	7	2	9	7.5	2	9.5		11	10	5	21	9	1
gRNAs♀/+;Cas9♂/+	N	0	0	0	-	7	2	9	7.5	2	9.5		12	11	13	13	28	1
gRNAs♀/+;Cas9♂/+	Y	0	0	0	-	7	2	9	8	2	10		13	17	11	13	6	1
gRNAs♀/+;Cas9♂/+	N	0	0	0	-	7	2	9	8	2	10		14	8	13	5	29	1
gRNAs♀/+;Cas9♂/+	N	0	0	0	-	7	2	9	8	2	10		15	12	5	4	5	1
gRNAs♀/+;Cas9♂/+	Y	0	0	0	-	7	2	9	8	2	10		16	19	13	17	22	1
gRNAs♀/+;Cas9♂/+	N	0	0	0	-	7	2	9	8	2	10		17	14	4	19	23	1
gRNAs♀/+;Cas9♂/+	N	0	0	0	-	7.5	2	9.5	8	2	10		18	8	17	17	9	1
gRNAs♀/+;Cas9♂/+	N	0	0	0	-	7.5	2	9.5	8	2	10		19	3	7	17	7	1
gRNAs♀/+;Cas9♂/+	N	0	0	0	-	7.5	2	9.5	8	2	10		20	11	16	13	6	1
	maximum =>	137

## Sheet: Supplementary file 1h
Supplementary file 1h. pgSIT males sterilize WT females
		gonotrophic cycle #1					gonotrophic cycle #2					gonotrophic cycle #3					gonotrophic cycle #4					gonotrophic cycle #5						total ♀ fertility %
experimental group	group name	♀ # took blood (1)	♀ # laid eggs (1)	fertile ♀ # (1)	sterile ♀ # (1)	♀ fertility % (1)	♀ # took blood (2)	♀ # laid eggs (2)	fertile ♀ # (2)	sterile ♀ # (2)	♀ fertility % (2)	♀ # took blood (3)	♀ # laid eggs (3)	fertile ♀ # (3)	sterile ♀ # (3)	♀ fertility % (3)	♀ # took blood (4)	♀ # laid eggs (4)	fertile ♀ # (4)	sterile ♀ # (4)	♀ fertility % (4)	♀ # took blood (5)	♀ # laid eggs (5)	fertile ♀ # (5)	sterile ♀ # (5)	♀ fertility % (5)	Maximum tested ♀ #	Maximum fertile ♀ #	Maximum ♀ fertility %
50 WT♀ X 250 WT♂ *	WT ♂	47	47	47	0	100	41	41	41	0	100	35	35	35	0	100	28	28	28	0	100	20	20	20	0	100	47	47	100
50 WT♀ X 250 WT♂ *	WT ♂	47	47	47	0	100	39	39	39	0	100	36	36	36	0	100	23	23	23	0	100	15	15	15	0	100	47	47	100
50 WT♀ X 250 WT♂ *	WT ♂	49	49	49	0	100	42	42	42	0	100	32	32	32	0	100	25	25	25	0	100	17	17	17	0	100	49	49	100
50 WT♀ †	no WT ♂	45	40	0	40	0	34	33	0	33	0	27	27	0	27	0	25	20	0	20	0	13	10	0	10	0	45	0	0
50 WT♀ †	no WT ♂	43	41	0	41	0	38	32	0	32	0	27	26	0	26	0	24	21	0	21	0	14	9	0	9	0	43	0	0
50 WT♀ †	no WT ♂	47	43	0	43	0	38	35	0	35	0	26	22	0	22	0	17	14	0	14	0	8	5	0	5	0	47	0	0
50 WT♀ after 1st gonotrophic cycle X 250 WT♂ †	later WT ♂	48	45	0	45	0	39	36	36	0	100	29	28	28	0	100	23	20	20	0	100	12	9	9	0	100	36	36	100
50 WT♀ after 1st gonotrophic cycle X 250 WT♂ †	later WT ♂	45	45	0	45	0	42	42	42	0	100	35	30	30	0	100	22	17	17	0	100	11	6	6	0	100	42	42	100
50 WT♀ after 1st gonotrophic cycle X 250 WT♂ †	later WT ♂	48	46	0	46	0	41	39	39	0	100	34	32	32	0	100	25	19	19	0	100	14	12	12	0	100	39	39	100
50 WT♀ X 250 pgSIT♂[Cas9♀](2hr) X 250 WT ♂(2days) †	2H-pgSIT♂[Cas9♀]	49	46	29	17	63.0435	16	15	0	15	0	11	9	0	9	0	7	7	0	7	0	2	0	0	0	0	46	29	63.0435
50 WT♀ X 250 pgSIT♂[Cas9♀](2hr) X 250 WT ♂(2days) †	2H-pgSIT♂[Cas9♀]	50	48	36	12	75	10	10	0	10	0	7	5	0	5	0	4	4	0	4	0	0	0	0	0	0	48	36	75
50 WT♀ X 250 pgSIT♂[Cas9♀](2hr) X 250 WT ♂(2days) †	2H-pgSIT♂[Cas9♀]	46	46	28	18	60.8696	14	12	0	12	0	10	9	1	8	11.1111	6	5	0	5	0	3	1	0	1	0	46	28	60.8696
50 WT♀ X 250 pgSIT♂[Cas9♀](6hr) X 250 WT ♂(2days) †	6H-pgSIT♂[Cas9♀]	48	46	25	21	54.3478	20	18	0	18	0	14	10	0	10	0	5	3	0	3	0	0	0	0	0	0	46	25	54.3478
50 WT♀ X 250 pgSIT♂[Cas9♀](6hr) X 250 WT ♂(2days) †	6H-pgSIT♂[Cas9♀]	49	45	27	18	60	15	13	0	13	0	9	8	0	8	0	5	4	0	4	0	1	1	0	1	0	45	27	60
50 WT♀ X 250 pgSIT♂[Cas9♀](6hr) X 250 WT ♂(2days) †	6H-pgSIT♂[Cas9♀]	48	47	22	25	46.8085	23	23	0	23	0	19	16	0	16	0	12	8	1	7	12.5	5	5	0	5	0	47	22	46.8085
50 WT♀ X 250 pgSIT♂[Cas9♀](12hr) X 250 WT ♂(2days) †	12H-pgSIT♂[Cas9♀]	50	46	9	37	19.5652	34	28	0	28	0	22	21	0	21	0	15	12	0	12	0	5	5	0	5	0	46	9	19.5652
50 WT♀ X 250 pgSIT♂[Cas9♀](12hr) X 250 WT ♂(2days) †	12H-pgSIT♂[Cas9♀]	48	47	13	34	27.6596	30	28	0	28	0	23	19	0	19	0	13	13	0	13	0	3	3	0	3	0	47	13	27.6596
50 WT♀ X 250 pgSIT♂[Cas9♀](12hr) X 250 WT ♂(2days) †	12H-pgSIT♂[Cas9♀]	47	43	11	32	25.5814	25	20	0	20	0	15	15	0	15	0	14	12	0	12	0	9	7	0	7	0	43	11	25.5814
50 WT♀ X 250 pgSIT♂[Cas9♀](24hr) X 250 WT ♂(2days) †	24H-pgSIT♂[Cas9♀]	43	43	1	42	2.32558	37	37	0	37	0	33	31	0	31	0	22	22	0	22	0	12	8	0	8	0	43	1	2.32558
50 WT♀ X 250 pgSIT♂[Cas9♀](24hr) X 250 WT ♂(2days) †	24H-pgSIT♂[Cas9♀]	48	45	3	42	6.66667	33	30	0	30	0	25	25	0	25	0	21	17	0	17	0	7	4	0	4	0	45	3	6.66667
50 WT♀ X 250 pgSIT♂[Cas9♀](24hr) X 250 WT ♂(2days) †	24H-pgSIT♂[Cas9♀]	49	48	4	44	8.33333	42	39	0	39	0	36	35	0	35	0	21	19	0	19	0	13	11	0	11	0	48	4	8.33333
50 WT♀ X 250 pgSIT♂[Cas9♀](48hr) X 250 WT ♂(2days) †	48H-pgSIT♂[Cas9♀]	49	47	1	46	2.12766	40	38	0	38	0	31	28	0	28	0	23	18	0	18	0	5	5	0	5	0	47	1	2.12766
50 WT♀ X 250 pgSIT♂[Cas9♀](48hr) X 250 WT ♂(2days) †	48H-pgSIT♂[Cas9♀]	46	46	2	44	4.34783	42	37	0	37	0	28	22	0	22	0	16	11	0	11	0	7	5	0	5	0	46	2	4.34783
50 WT♀ X 250 pgSIT♂[Cas9♀](48hr) X 250 WT ♂(2days) †	48H-pgSIT♂[Cas9♀]	47	45	0	45	0	38	32	0	32	0	22	18	0	18	0	12	7	0	7	0	4	2	0	2	0	45	0	0
50 WT♀ X 250 pgSIT♂[Cas9♂](2hr) X 250 WT ♂(2days) †	2H-pgSIT♂[Cas9♂]	50	45	26	19	57.7778	17	17	0	17	0	12	11	0	11	0	6	6	0	6	0	1	1	0	0	0	50	26	52
50 WT♀ X 250 pgSIT♂[Cas9♂](2hr) X 250 WT ♂(2days) †	2H-pgSIT♂[Cas9♂]	47	47	32	15	68.0851	13	11	0	11	0	8	7	0	7	0	3	2	0	2	0	1	1	0	0	0	47	32	68.0851
50 WT♀ X 250 pgSIT♂[Cas9♂](2hr) X 250 WT ♂(2days) †	2H-pgSIT♂[Cas9♂]	49	49	26	23	53.0612	21	20	0	20	0	15	11	0	11	0	7	4	0	4	0	3	2	0	1	0	49	26	53.0612
50 WT♀ X 250 pgSIT♂[Cas9♂](6hr) X 250 WT ♂(2days) †	6H-pgSIT♂[Cas9♂]	50	49	27	22	55.102	22	22	0	22	0	17	12	0	12	0	6	6	0	6	0	2	2	0	0	0	50	27	54
50 WT♀ X 250 pgSIT♂[Cas9♂](6hr) X 250 WT ♂(2days) †	6H-pgSIT♂[Cas9♂]	48	47	23	24	48.9362	21	20	0	20	0	15	12	0	12	0	8	7	0	7	0	2	1	0	1	0	48	23	47.9167
50 WT♀ X 250 pgSIT♂[Cas9♂](6hr) X 250 WT ♂(2days) †	6H-pgSIT♂[Cas9♂]	49	49	20	29	40.8163	25	22	0	22	0	17	15	0	15	0	9	9	0	9	0	3	3	0	5	0	49	20	40.8163
50 WT♀ X 250 pgSIT♂[Cas9♂](12hr) X 250 WT ♂(2days) †	12H-pgSIT♂[Cas9♂]	48	47	10	37	21.2766	35	33	0	33	0	26	20	0	20	0	13	10	0	10	0	6	6	0	5	0	48	10	20.8333
50 WT♀ X 250 pgSIT♂[Cas9♂](12hr) X 250 WT ♂(2days) †	12H-pgSIT♂[Cas9♂]	49	49	9	40	18.3673	36	36	0	36	0	25	21	0	21	0	15	14	0	14	0	5	2	0	3	0	49	9	18.3673
50 WT♀ X 250 pgSIT♂[Cas9♂](12hr) X 250 WT ♂(2days) †	12H-pgSIT♂[Cas9♂]	46	46	12	34	26.087	32	29	0	29	0	20	16	0	16	0	9	7	0	7	0	2	0	0	7	0	46	12	26.087
50 WT♀ X 250 pgSIT♂[Cas9♂](24hr) X 250 WT ♂(2days) †	24H-pgSIT♂[Cas9♂]	50	49	2	47	4.08163	40	37	0	37	0	24	18	0	18	0	11	10	0	10	0	5	4	0	8	0	50	2	4
50 WT♀ X 250 pgSIT♂[Cas9♂](24hr) X 250 WT ♂(2days) †	24H-pgSIT♂[Cas9♂]	49	47	1	46	2.12766	42	39	0	39	0	27	24	0	24	0	18	15	1	15	6.66667	6	6	0	4	0	49	2	4.08163
50 WT♀ X 250 pgSIT♂[Cas9♂](24hr) X 250 WT ♂(2days) †	24H-pgSIT♂[Cas9♂]	47	47	3	44	6.38298	41	36	0	36	0	31	28	0	28	0	20	18	0	18	0	11	9	0	11	0	47	3	6.38298
50 WT♀ X 250 pgSIT♂[Cas9♂](48hr) X 250 WT ♂(2days) †	48H-pgSIT♂[Cas9♂]	48	48	0	48	0	42	37	0	37	0	30	25	0	25	0	17	16	0	16	0	8	8	0	5	0	48	0	0
50 WT♀ X 250 pgSIT♂[Cas9♂](48hr) X 250 WT ♂(2days) †	48H-pgSIT♂[Cas9♂]	49	47	1	46	2.12766	39	35	0	35	0	29	20	0	20	0	13	13	0	13	0	3	1	0	5	0	49	1	2.04082
50 WT♀ X 250 pgSIT♂[Cas9♂](48hr) X 250 WT ♂(2days) †	48H-pgSIT♂[Cas9♂]	50	48	1	47	2.08333	44	41	0	41	0	32	24	0	24	0	15	14	0	14	0	6	3	0	2	0	50	1	2
*We transferred all females that took blood, and since all of them can lay eggs, and eggs can hatch, we repeat this 5 gonotropic cycles
† non-fertile ♀’s were then placed back into cages along with the original WT ♂ s (plus 50 new mature WT ♂ s) for another chance to produce progeny. This was repeated for up to five gonotrophic cycles.

## Sheet: Supplementary file 1i
Supplementary file 1i. Data on population suppression
Cage ID	Replicate #	Genotypes Crossed	Generation 1										Generation 2										Generation 3										Generation 4										Generation 5
			Laid egg #	Normalized laid eggs	Selected egg #	Hatched selected egg #	Hatching rate	Genotype of larvae	Left egg #	Hatched left egg #	Hatching rate of left eggs	Genotype of larvae	Laid egg #	Normalized laid eggs	Selected egg #	Hatched selected egg #	Hatching rate	Genotype of larvae	Left egg #	Hatched left egg #	Hatching rate of left eggs	Genotype of larvae	Laid egg #	Normalized laid eggs	Selected egg #	Hatched selected egg #	Hatching rate	Genotype of larvae	Left egg #	Hatched left egg #	Hatching rate of left eggs	Genotype of larvae	Laid egg #	Normalized laid eggs	Selected egg #	Hatched selected egg #	Hatching rate	Genotype of larvae	Left egg #	Hatched left egg #	Hatching rate of left eggs	Genotype of larvae	Laid egg #	Normalized laid eggs	Selected egg #	Hatched selected egg #	Hatching rate	Genotype of larvae	Left egg #
cage1	Replicate 1	50 WT♂ X 50 WT♀	4665	90.1798	100	94	94	+/+	4565	4338	95.0274	+/+	4793	92.6542	100	95	95	+/+	4693	4421	94.2041	+/+	4860	93.9494	100	93	93	+/+	4760	4472	93.9496	+/+	5059	97.7962	100	95	95	+/+	4959	4748	95.7451	+/+	4752	91.8616	100	95	95	+/+	4652
cage2	Replicate 2	50 WT♂ X 50 WT♀	4371	84.4964	100	96	96	+/+	4271	4009	93.8656	+/+	4574	88.4206	100	95	95	+/+	4474	4317	96.4908	+/+	4426	85.5596	100	95	95	+/+	4326	4155	96.0472	+/+	4781	92.4222	100	95	95	+/+	4681	4396	93.9116	+/+	4683	90.5277	100	92	92	+/+	4583
cage3	Replicate 3	50 WT♂ X 50 WT♀	5112	98.8208	100	94	94	+/+	5012	4791	95.5906	+/+	4886	94.452	100	94	94	+/+	4786	4595	96.0092	+/+	4512	87.2221	100	94	94	+/+	4412	4106	93.0644	+/+	4239	81.9447	100	96	96	+/+	4139	3899	94.2015	+/+	4862	93.988	100	95	95	+/+	4762
cage4	Replicate 1	50 gRNA[dsx,ix,βTub]/gRNA[dsx,ix,βTub]♂ X 50 WT♀	4573	88.4013	100	86	86	gRNA/+	4473	3879	86.7203	gRNA/+	4682	90.5084	100	85	85	gRNA/gRNA; gRNA/+; +/+	4582	3927	85.7049	gRNA/gRNA; gRNA/+; +/+	4759	91.9969	100	83	83	gRNA/gRNA; gRNA/+; +/+	4659	3995	85.748	gRNA/gRNA; gRNA/+; +/+	4315	83.4139	100	84	84	gRNA/gRNA; gRNA/+; +/+	4215	3534	83.8434	gRNA/gRNA; gRNA/+; +/+	4186	80.9202	100	86	86	gRNA/gRNA; gRNA/+; +/+	4086
cage5	Replicate 2	50 gRNA[dsx,ix,βTub]/gRNA[dsx,ix,βTub]♂ X 50 WT♀	4436	85.7529	100	84	84	gRNA/+	4336	3666	84.548	gRNA/+	4528	87.5314	100	83	83	gRNA/gRNA; gRNA/+; +/+	4428	3754	84.7787	ggRNA/gRNA; gRNA/+; +/+	4873	94.2007	100	82	82	gRNA/gRNA; gRNA/+; +/+	4773	3893	81.563	gRNA/gRNA; gRNA/+; +/+	4193	81.0555	100	86	86	gRNA/gRNA; gRNA/+; +/+	4093	3391	82.8488	gRNA/gRNA; gRNA/+; +/+	4467	86.3522	100	84	84	gRNA/gRNA; gRNA/+; +/+	4367
cage6	Replicate 3	50 gRNA[dsx,ix,βTub]/gRNA[dsx,ix,βTub]♂ X 50 WT♀	4792	92.6348	100	83	83	gRNA/+	4692	3823	81.4791	gRNA]/+	3984	77.0153	100	86	86	gRNA/gRNA; gRNA/+; +/+	3884	3226	83.0587	gRNA/gRNA; gRNA/+; +/+	4247	82.0994	100	84	84	gRNA/gRNA; gRNA/+; +/+	4147	3592	86.6168	gRNA/gRNA; gRNA/+; +/+	4672	90.3151	100	83	83	gRNA/gRNA; gRNA/+; +/+	4572	3827	83.7052	gRNA/gRNA; gRNA/+; +/+	4459	86.1976	100	87	87	gRNA/gRNA; gRNA/+; +/+	4359
cage7	Replicate 1	50 Cas9/Cas9♂ X 50 WT♀	3862	74.6569	100	81	81	Cas9/+	3762	3011	80.0372	Cas9/+	4299	83.1046	100	84	84	Cas9/Cas9; Cas9/+; +/+	4199	3522	83.8771	Cas9/Cas9; Cas9/+; +/+	4358	84.2451	100	84	84	Cas9/Cas9; Cas9/+; +/+	4258	3504	82.2922	Cas9/Cas9; Cas9/+; +/+	3892	75.2368	100	80	80	Cas9/Cas9; Cas9/+; +/+	3792	3185	83.9926	Cas9/Cas9; Cas9/+; +/+	3770	72.8784	100	83	83	Cas9/Cas9; Cas9/+; +/+	3670
cage8	Replicate 2	50 Cas9/Cas9♂ X 50 WT♀	4277	82.6793	100	78	78	Cas9/+	4177	3313	79.3153	Cas9/+	4152	80.2629	100	82	82	Cas9/Cas9; Cas9/+; +/+	4052	3315	81.8115	Cas9/Cas9; Cas9/+; +/+	3974	76.822	100	81	81	Cas9/Cas9; Cas9/+; +/+	3874	3117	80.4595	Cas9/Cas9; Cas9/+; +/+	4445	85.9269	100	83	83	Cas9/Cas9; Cas9/+; +/+	4345	3518	80.9666	Cas9/Cas9; Cas9/+; +/+	4018	77.6725	100	84	84	Cas9/Cas9; Cas9/+; +/+	3918
cage9	Replicate 3	50 Cas9/Cas9♂ X 50 WT♀	4158	80.3789	100	83	83	Cas9/+	4058	3427	84.4505	Cas9/+	4254	82.2347	100	81	81	Cas9/Cas9; Cas9/+; +/+	4154	3328	80.1156	Cas9/Cas9; Cas9/+; +/+	4171	80.6302	100	83	83	Cas9/Cas9; Cas9/+; +/+	4071	3399	83.493	Cas9/Cas9; Cas9/+; +/+	4283	82.7953	100	84	84	Cas9/Cas9; Cas9/+; +/+	4183	3419	81.7356	Cas9/Cas9; Cas9/+; +/+	4032	77.9432	100	78	78	Cas9/Cas9; Cas9/+; +/+	3932
cage10	Replicate 1	50 pgSIT[♀cas9]♂ & 50 WT♂ X 50 WT♀	5070	98.0089	100	86	86	+/+	4970	4165	83.8028	+/+	4138	79.9923	100	88	88	+/+	4038	3511	86.949	+/+	4464	86.2942	100	89	89	+/+	4364	3820	87.5344	+/+	4356	84.2065	100	80	80	+/+	4256	3403	79.9577	+/+	3884	75.0822	100	85	85	+/+	3784
cage11	Replicate 2	50 pgSIT[♀cas9]♂ & 50 WT♂ X 50 WT♀	4832	93.4081	100	92	92	gRNA/+, Cas9/+, +/+	4732	4298	90.8284	gRNA/+, Cas9/+, +/+	4681	90.4891	100	93	93	gRNA/+, +/+	4581	4106	89.6311	gRNA/+, Cas9/+, +/+	4369	84.4578	100	83	83	+/+	4269	3406	79.7845	+/+	4128	79.799	100	84	84	+/+	4028	3492	86.6931	+/+	4059	78.4651	100	86	86	+/+	3959
cage12	Replicate 3	50 pgSIT[♀cas9]♂ & 50 WT♂ X 50 WT♀	4479	86.5842	100	91	91	+/+	4379	4050	92.4869	+/+	4729	91.417	100	77	77	+/+	4629	3755	81.119	+/+	4028	77.8658	100	82	82	+/+	3928	3175	80.8299	+/+	4474	86.4875	100	71	71	+/+	4374	3176	72.6109	+/+	3730	72.1052	100	65	65	+/+	3630
cage13	Replicate 1	250 pgSIT[♀cas9]♂ & 50 WT♂ X 50 WT♀	4776	92.3255	100	94	94	+/+	4676	4305	92.0659	+/+	4276	82.66	100	75	75	+/+	4176	3159	75.6466	+/+	3734	72.1825	100	82	82	+/+	3634	3003	82.6362	+/+	4240	81.964	100	68	68	+/+	4140	2661	64.2754	+/+	3615	69.8821	100	76	76	+/+	3515
cage14	Replicate 2	250 pgSIT[♀cas9]♂ & 50 WT♂ X 50 WT♀	5013	96.907	100	90	90	+/+	4913	4592	93.4663	+/+	4820	93.1761	100	87	87	+/+	4720	4046	85.7203	+/+	4671	90.2958	100	82	82	+/+	4571	3674	80.3763	+/+	3793	73.323	100	84	84	+/+	3693	3170	85.8381	+/+	4078	78.8324	100	87	87	+/+	3978
cage15	Replicate 3	250 pgSIT[♀cas9]♂ & 50 WT♂ X 50 WT♀	4972	96.1144	100	89	89	+/+	4872	4421	90.743	+/+	4936	95.4185	100	85	85	+/+	4836	4233	87.531	+/+	4215	81.4808	100	84	84	+/+	4115	3495	84.9332	+/+	4199	81.1715	100	75	75	+/+	4099	3052	74.4572	+/+	3744	72.3758	100	71	71	+/+	3644
cage16	Replicate 1	500 pgSIT[♀cas9]♂ & 50 WT♂ X 50 WT♀	4574	88.4206	100	87	87	+/+	4474	3810	85.1587	+/+	3904	75.4688	100	78	78	+/+	3804	3050	80.1788	+/+	4059	78.4651	100	81	81	+/+	3959	3277	82.7734	+/+	3590	69.3988	100	52	52	+/+	3490	1733	49.6562	+/+	2480	47.9412	100	44	44	+/+	2380
cage17	Replicate 2	500 pgSIT[♀cas9]♂ & 50 WT♂ X 50 WT♀	4257	82.2927	100	82	82	+/+	4157	3352	80.6351	+/+	3799	73.439	100	75	75	+/+	3699	2936	79.3728	+/+	3520	68.0456	100	62	62	+/+	3420	2004	58.5965	+/+	3015	58.2834	100	35	35	+/+	2915	1127	38.6621	+/+	1692	32.7083	100	26	26	+/+	1592
cage18	Replicate 3	500 pgSIT[♀cas9]♂ & 50 WT♂ X 50 WT♀	4478	86.5649	100	85	85	+/+	4378	3793	86.6377	+/+	4005	77.4212	100	82	82	+/+	3905	3112	79.6927	+/+	3618	69.9401	100	53	53	+/+	3518	1973	56.083	+/+	2744	53.0447	100	46	46	+/+	2644	1295	48.9788	+/+	2428	46.936	100	19	19	+/+	2328
cage19	Replicate 1	1000 pgSIT[♀cas9]♂ & 50 WT♂ X 50 WT♀	4523	87.4348	100	75	75	+/+	4423	3175	71.7839	+/+	3314	64.0634	100	33	33	+/+	3214	1127	35.0653	+/+	2015	38.9523	100	24	24	+/+	1915	527	27.5196	+/+	1019	19.6984	100	7	7	+/+	919	4	0.435256	+/+	273	5.2774	100	0	0	-	173
cage20	Replicate 2	1000 pgSIT[♀cas9]♂ & 50 WT♂ X 50 WT♀	3926	75.8941	100	80	80	+/+	3826	3119	81.5212	+/+	3512	67.891	100	64	64	+/+	3412	2126	62.3095	+/+	2824	54.5911	100	17	17	+/+	2724	438	16.0793	+/+	614	11.8693	100	2	2	+/+	514	19	3.6965	+/+	0	0	0	0	0	-	0
cage21	Replicate 3	1000 pgSIT[♀cas9]♂ & 50 WT♂ X 50 WT♀	4155	80.3209	100	57	57	gRNA/+, Cas9/+, +/+	4055	2477	61.0851	gRNA/+, Cas9/+, +/+	3016	58.3027	100	51	51	+/+	2916	1420	48.6968	+/+	2325	44.9449	100	28	28	+/+	2225	575	25.8427	+/+	982	18.9832	100	0	0	+/+	882	0	0	+/+	0	0	-	-	0	-	-
cage22	Replicate 1	2000 pgSIT[♀cas9]♂ & 50 WT♂ X 50 WT♀	4396	84.9797	100	53	53	+/+	4296	2362	54.9814	+/+	2461	47.5739	100	15	15	+/+	2361	453	19.1868	+/+	771	14.9043	100	0	0	+/+	671	0	0	+/+	0	0	0	0	0	-	0	0	0	-	0	0	-	-	0	-	-
cage23	Replicate 2	2000 pgSIT[♀cas9]♂ & 50 WT♂ X 50 WT♀	4530	87.5701	100	41	41	+/+	4430	1883	42.5056	+/+	1968	38.0437	100	21	21	+/+	1868	466	24.9465	+/+	954	18.4419	100	3	3	+/+	854	37	4.33255	+/+	0	0	0	0	0	-	0	0	0	-	0	0	-	-	0	-	-
cage24	Replicate 3	2000 pgSIT[♀cas9]♂ & 50 WT♂ X 50 WT♀	4879	94.3166	100	46	46	+/+	4779	2050	42.896	+/+	2296	44.3843	100	9	9	+/+	2196	245	11.1566	+/+	537	10.3808	100	0	0	+/+	437	0	0	+/+	0	0	0	0	0	-	0	0	0	-	0	0	-	-	0	-	-
cage1	Replicate 1	50 pgSIT[♂Cas9]♂ & 50 WT♂ X 50 WT♀	4791	92.6155	100	93	93	+/+	4691	4322	92.1339	+/+	4852	93.7947	100	90	90	gRNA/+; Cas9/+；+/+	4752	4370	91.9613	gRNA/+; Cas9/+; gRNA/Cas9/+; +/+	4835	93.4661	100	81	81	gRNA/+; Cas9/+；+/+	4735	3839	81.0771	gRNA/+; Cas9/+; gRNA/Cas9; +/+	4711	91.069	100	85	85	gRNA/+; Cas9/+；+/+	4611	4041	87.6383	gRNA/+; cas9/+; +/+	4279	82.718	100	87	87	gRNA/+; Cas9/+；+/+	4179
cage2	Replicate 2	50 pgSIT[♂Cas9]♂ & 50 WT♂ X 50 WT♀	4627	89.4452	100	84	84	+/+	4527	3886	85.8405	+/+	4721	91.2623	100	87	87	+/+	4621	4083	88.3575	+/+	4773	92.2675	100	84	84	+/+	4673	4030	86.2401	+/+	4515	87.2801	100	80	80	+/+	4415	3508	79.4564	+/+	4476	86.5262	100	85	85	+/+	4376
cage3	Replicate 3	50 pgSIT[♂Cas9]♂ & 50 WT♂ X 50 WT♀	4894	94.6066	100	87	87	+/+	4794	4235	88.3396	+/+	4927	95.2445	100	85	85	+/+	4827	4319	89.4759	+/+	4662	90.1218	100	87	87	+/+	4562	4006	87.8124	+/+	4579	88.5173	100	84	84	+/+	4479	3898	87.0284	+/+	4525	87.4734	100	83	83	+/+	4425
cage4	Replicate 1	250 pgSIT[♂Cas9]♂ & 50 WT♂ X 50 WT♀	5173	100	100	86	86	+/+	5073	4317	85.0976	+/+	4549	87.9374	100	82	82	+/+	4449	3610	81.1418	+/+	4015	77.6145	100	77	77	+/+	3915	3101	79.2082	+/+	4057	78.4264	100	76	76	+/+	3957	3016	76.2194	+/+	3414	65.9965	100	70	70	+/+	3314
cage5	Replicate 2	250 pgSIT[♂Cas9]♂ & 50 WT♂ X 50 WT♀	4527	87.5121	100	91	91	+/+	4427	3899	88.0732	+/+	4633	89.5612	100	88	88	+/+	4533	4003	88.308	+/+	4535	87.6667	100	84	84	+/+	4435	3692	83.2469	+/+	4325	83.6072	100	86	86	+/+	4225	3559	84.2367	+/+	4118	79.6056	100	79	79	+/+	4018
cage6	Replicate 3	250 pgSIT[♂Cas9]♂ & 50 WT♂ X 50 WT♀	5026	97.1583	100	88	88	+/+	4926	4437	90.0731	+/+	4936	95.4185	100	86	86	+/+	4836	4195	86.7452	+/+	4527	87.5121	100	83	83	+/+	4427	3584	80.9578	+/+	4230	81.7707	100	80	80	+/+	4130	3342	80.9201	+/+	3897	75.3335	100	86	86	+/+	3797
cage7	Replicate 1	500 pgSIT[♂Cas9]♂ & 50 WT♂ X 50 WT♀	4775	92.3062	100	83	83	+/+	4675	3931	84.0856	+/+	4524	87.4541	100	75	75	+/+	4424	3267	73.8472	+/+	3520	68.0456	100	53	53	+/+	3420	1774	51.8713	+/+	2718	52.542	100	37	37	+/+	2618	1054	40.2597	+/+	2125	41.0787	100	20	20	+/+	2025
cage8	Replicate 2	500 pgSIT[♂Cas9]♂ & 50 WT♂ X 50 WT♀	5019	97.023	100	83	83	+/+	4919	3992	81.1547	+/+	4155	80.3209	100	70	70	+/+	4055	2918	71.9605	+/+	3431	66.3251	100	71	71	+/+	3331	2343	70.3392	+/+	2634	50.9182	100	42	42	+/+	2534	1117	44.0805	+/+	2001	38.6816	100	23	23	+/+	1901
cage9	Replicate 3	500 pgSIT[♂Cas9]♂ & 50 WT♂ X 50 WT♀	4828	93.3308	100	76	76	+/+	4728	3659	77.39	+/+	3938	76.126	100	64	64	+/+	3838	2529	65.8937	+/+	3769	72.8591	100	47	47	+/+	3669	1720	46.8793	+/+	2513	48.5792	100	31	31	+/+	2413	769	31.869	+/+	1490	28.8034	100	25	25	+/+	1390
cage10	Replicate 1	1000 pgSIT[♂Cas9]♂ & 50 WT♂ X 50 WT♀	4496	86.9128	100	77	77	+/+	4396	3340	75.9782	+/+	3785	73.1684	100	51	51	+/+	3685	2054	55.7395	+/+	2418	46.7427	100	45	45	+/+	2318	1060	45.7291	+/+	1322	25.5558	100	3	3	+/+	1222	58	4.74632	+/+	83	1.60448	83	0	0	+/+	0
cage11	Replicate 2	1000 pgSIT[♂Cas9]♂ & 50 WT♂ X 50 WT♀	4162	80.4562	100	62	62	+/+	4062	2594	63.8602	+/+	3108	60.0812	100	39	39	+/+	3008	1116	37.1011	+/+	2022	39.0876	100	29	29	+/+	1922	512	26.6389	+/+	1473	28.4748	100	9	9	+/+	1373	136	9.90532	+/+	214	4.13686	0	0	0	+/+	214
cage12	Replicate 3	1000 pgSIT[♂Cas9]♂ & 50 WT♂ X 50 WT♀	4237	81.9061	100	75	75	+/+	4137	3137	75.8279	+/+	3210	62.053	100	77	77	+/+	3110	2427	78.0386	+/+	1974	38.1597	100	16	16	+/+	1874	315	16.809	+/+	1026	19.8338	100	0	0	+/+	926	0	0	+/+	0	0	-	-	0	-	-
cage13	Replicate 1	2000 pgSIT[♂Cas9]♂ & 50 WT♂ X 50 WT♀	4179	80.7848	100	47	47	+/+	4079	1981	48.5658	+/+	2273	43.9397	100	18	18	+/+	2173	381	17.5334	+/+	818	15.8129	100	0	0	+/+	718	0	0	+/+	0	0	0	0	0	-	0	0	0	-	0	0	-	-	0	-	-
cage14	Replicate 2	2000 pgSIT[♂Cas9]♂ & 50 WT♂ X 50 WT♀	4218	81.5388	100	39	39	+/+	4118	1689	41.0151	+/+	2014	38.9329	100	15	15	+/+	1914	259	13.5319	+/+	629	12.1593	100	0	0	+/+	529	5	0.94518	+/+	0	0	0	0	0	-	0	0	0	-	0	0	-	-	0	-	-
cage15	Replicate 3	2000 pgSIT[♂Cas9]♂ & 50 WT♂ X 50 WT♀	3970	76.7446	100	59	59	+/+	3870	2234	57.7261	+/+	2875	55.577	100	31	31	+/+	2775	893	32.1802	+/+	1677	32.4183	100	11	11	+/+	1577	195	12.3653	+/+	924	17.862	100	0	0	+/+	824	0	0	+/+	104	2.01044	100	-	0	-	-
[truncated: 3 more columns]

## Sheet: Supplementary file 1j
Supplementary file 1j. RNA sequencing differential expression analysis using DeSeq2 comparing pgSIT female to WT Liverpool female
NCBI_ID	baseMean	log2FoldChange	lfcSE	stat	pvalue	padj	Symbol	Aliases	description	other_designations	map_location	chromosome	genomic_nucleotide_accession.version	start_position_on_the_genomic_accession	end_position_on_the_genomic_accession	orientation	exon_count	OMIM
LOC5572963	1284.18	4.74664	0.20627	23.0118	3.55e-117	5.11e-113	LOC5572963	AaeL_AAEL010160, AAEL010160	uncharacterized LOC5572963	uncharacterized protein LOC5572963		3	NC_035109.1	149193867	149195145	minus	3
LOC5572960	769.197	6.33339	0.287031	22.0652	6.83e-108	4.91e-104	LOC5572960	AaeL_AAEL010183, AAEL010183	uncharacterized LOC5572960	uncharacterized protein LOC5572960		3	NC_035109.1	149144458	149154335	minus	4
LOC5577708	5754.86	4.00371	0.188	21.2964	1.23e-100	5.88e-97	LOC5577708	AaeL_AAEL013343, AAEL013343	protein lethal(2)essential for life	protein lethal(2)essential for life		2	NC_035108.1	135777711	135793775	plus	3
LOC5571443	6728.96	2.82333	0.146712	19.2441	1.58e-82	5.69e-79	LOC5571443	AaeL_AAEL009081, AAEL009081, SG56.5sp	uncharacterized LOC5571443	uncharacterized protein LOC5571443|putative 56.5 kDa secreted protein		2	NC_035108.1	3663537	3665244	minus	1
LOC5577651	1105.07	-2.14032	0.11696	-18.2995	8.35e-75	2.4e-71	LOC5577651		uncharacterized LOC5577651	uncharacterized protein LOC5577651		1	NC_035107.1	291136131	291136933	minus	1
LOC5572964	797.233	3.70025	0.204069	18.1323	1.77e-73	4.24e-70	LOC5572964		uncharacterized LOC5572964			3	NC_035109.1	149195270	149196129	plus	4
LOC5574784	1618.52	-2.46639	0.163409	-15.0933	1.79e-51	3.68e-48	LOC5574784	AaeL_AAEL011421, AAEL011421	multiple inositol polyphosphate phosphatase 1	multiple inositol polyphosphate phosphatase 1		3	NC_035109.1	328802417	328804150	minus	2
LOC110676001	1733.8	2.86167	0.194678	14.6995	6.5e-49	1.17e-45	LOC110676001		uncharacterized LOC110676001	uncharacterized protein LOC110676001		2	NC_035108.1	125694076	125695420	minus	2
LOC5566780	341.503	3.60304	0.246426	14.6212	2.06e-48	3.29e-45	LOC5566780	AaeL_AAEL015247, AAEL015247, APN-III	membrane alanyl aminopeptidase	membrane alanyl aminopeptidase|aminopeptidase N		1	NC_035107.1	201683860	201710098	plus	7
LOC5575658	417.414	5.00077	0.349379	14.3133	1.81e-46	2.6e-43	LOC5575658	AaeL_AAEL002693, AAEL002693	venom allergen 5.02	venom allergen 5.02		2	NC_035108.1	466919536	466920702	plus	4
LOC5567194	1174.85	2.67684	0.190614	14.0433	8.47e-45	1.11e-41	LOC5567194	AaeL_AAEL000859, AAEL000859	surface antigen CRP170	surface antigen CRP170		3	NC_035109.1	335086218	335094925	plus	6
LOC5572927	12541.8	-2.33478	0.168263	-13.8758	8.88e-44	1.06e-40	LOC5572927	AaeL_AAEL010147, AAEL010147	uncharacterized LOC5572927	uncharacterized protein LOC5572927		2	NC_035108.1	264813800	264917896	minus	25
LOC5579170	5745.29	10.4138	0.756338	13.7687	3.93e-43	4.35e-40	LOC5579170	AaeL_AAEL003881, AAEL003881	ubiquitin	ubiquitin		3	NC_035109.1	84642960	84643470	minus	1
LOC5566809	221505	-3.21624	0.235197	-13.6747	1.44e-42	1.48e-39	LOC5566809	AaeL_AAEL005656, AAEL005656	myosin heavy chain, muscle	myosin heavy chain, muscle		2	NC_035108.1	382063773	382101568	minus	16
LOC110675441	3314.52	1.63175	0.119825	13.6177	3.14e-42	3.01e-39	LOC110675441	SG8.5sp	biofilm and cell wall regulator 1-like	biofilm and cell wall regulator 1-like|putative 8.3 kDa secreted protein|putative 8.5 kDa secreted protein		2	NC_035108.1	34363058	34363524	minus	1
LOC5571844	27668.3	4.59031	0.339149	13.5348	9.74e-42	8.75e-39	LOC5571844	AaeL_AAEL001703, AAEL001703, JA15	serine protease SP24D	serine protease SP24D|chymotrypsin-like serine protease		2	NC_035108.1	87887477	87888435	plus	2
LOC5578619	2395.32	2.15389	0.159706	13.4866	1.88e-41	1.59e-38	LOC5578619	AaeL_AAEL003590, AAEL003590	uncharacterized LOC5578619	uncharacterized protein LOC5578619		2	NC_035108.1	125661934	125662596	minus	2
LOC5578792	5235.03	-3.49799	0.259859	-13.4611	2.65e-41	2.11e-38	LOC5578792	AaeL_AAEL003674, AAEL003674	histone-lysine N-methyltransferase SMYD3	histone-lysine N-methyltransferase SMYD3		2	NC_035108.1	316639443	316647828	minus	6
LOC5568698	2204.94	1.34326	0.0998153	13.4574	2.78e-41	2.11e-38	LOC5568698	AaeL_AAEL007064, AAEL007064, GNBPB6	beta-1,3-glucan-binding protein	beta-1,3-glucan-binding protein|putative secreted protein		3	NC_035109.1	298780816	298782240	minus	4
LOC5567037	13084.7	2.49182	0.185616	13.4246	4.34e-41	3.12e-38	LOC5567037	AaeL_AAEL005790, AAEL005790	NADP-dependent malic enzyme	NADP-dependent malic enzyme|malic enzyme		1	NC_035107.1	121872294	121935808	minus	6
LOC5565474	10369.3	3.96166	0.296416	13.3652	9.65e-41	6.61e-38	LOC5565474	AaeL_AAEL002495, AAEL002495, IMUCR1, IMUCR3	probable chitinase 10	probable chitinase 10|mucin-like peritrophin|mucin-like protein|putative mucin-like protein IMUCR3		2	NC_035108.1	79141772	79143050	plus	2
LOC5569401	519.413	-3.51575	0.26489	-13.2725	3.34e-40	2.18e-37	LOC5569401	AaeL_AAEL007602, AAEL007602	trypsin-1	trypsin-1		3	NC_035109.1	18171068	18177207	plus	3
LOC5569002	73554.1	-1.88083	0.142632	-13.1866	1.05e-39	6.55e-37	LOC5569002	AaeL_AAEL007281, AAEL007281	muscle M-line assembly protein unc-89	muscle M-line assembly protein unc-89		3	NC_035109.1	196223235	196299101	plus	8
LOC5567084	285.662	2.88306	0.21976	13.1191	2.56e-39	1.53e-36	LOC5567084	AaeL_AAEL005821, AAEL005821	membrane alanyl aminopeptidase	membrane alanyl aminopeptidase		Un	NW_018736627.1	6677	31518	minus	7
LOC5569528	3070.57	4.05066	0.310315	13.0534	6.08e-39	3.5e-36	LOC5569528	AaeL_AAEL007703, AAEL007703	uncharacterized LOC5569528	uncharacterized protein LOC5569528		2	NC_035108.1	470825061	470826652	plus	2
LOC5577524	13795.6	1.95157	0.149716	13.0352	7.72e-39	4.27e-36	LOC5577524	AaeL_AAEL003203, AAEL003203	acyl-CoA Delta(11) desaturase	acyl-CoA Delta(11) desaturase		1	NC_035107.1	189772709	189813316	plus	8
LOC5573924	397.152	-2.17604	0.167029	-13.0279	8.49e-39	4.52e-36	LOC5573924	AaeL_AAEL002231, AAEL002231	adult cuticle protein 1	adult cuticle protein 1		2	NC_035108.1	429170789	429171449	plus	2
tdTomato	3981.93	15.3013	1.18376	12.926	3.21e-38	1.65e-35
LOC5569753	1431.79	2.07578	0.161809	12.8286	1.13e-37	5.62e-35	LOC5569753	AaeL_AAEL007909, AAEL007909	branched-chain-amino-acid aminotransferase, cytosolic	branched-chain-amino-acid aminotransferase, cytosolic		1	NC_035107.1	63466198	63482637	minus	6
LOC5573132	6613.07	1.34232	0.105172	12.7631	2.63e-37	1.26e-34	LOC5573132	AaeL_AAEL002023, AAEL002023	chitinase-like protein Idgf4	chitinase-like protein Idgf4		2	NC_035108.1	425558593	425582486	minus	3
LOC110679081	3226.9	2.74861	0.217495	12.6376	1.31e-36	6.07e-34	LOC110679081		neurofilament light polypeptide-like	neurofilament light polypeptide-like		3	NC_035109.1	36962636	36963420	plus	2
LOC5578811	2419.97	-1.90781	0.151985	-12.5527	3.84e-36	1.73e-33	LOC5578811	AaeL_AAEL013853, AAEL013853, CTLGA2_b	uncharacterized LOC5578811	uncharacterized protein LOC5578811		2	NC_035108.1	100166111	100200638	plus	4
LOC5572463	8957.03	1.17724	0.0941829	12.4996	7.51e-36	3.27e-33	LOC5572463	AaeL_AAEL001798, AAEL001798	protein tyrosine phosphatase type IVA 1	protein tyrosine phosphatase type IVA 1		2	NC_035108.1	376230807	376428149	plus	10
LOC110678055	2061.82	2.38748	0.191473	12.469	1.1e-35	4.66e-33	LOC110678055		F-box/LRR-repeat protein 2-like	F-box/LRR-repeat protein 2-like		3	NC_035109.1	350874353	350886400	minus	5
LOC5572026	1094.53	-1.33256	0.10698	-12.4561	1.3e-35	5.32e-33	LOC5572026	AaeL_AAEL000249, AAEL000249	solute carrier family 25 member 35	solute carrier family 25 member 35		1	NC_035107.1	6512316	6546660	plus	5
LOC5572950	1496.31	-1.73856	0.139873	-12.4296	1.81e-35	7.21e-33	LOC5572950	AaeL_AAEL010178, AAEL010178	WD repeat-containing protein 87	DNA ligase 1|WD repeat-containing protein 87		3	NC_035109.1	148665310	148741442	minus	10
LOC5575142	2618.86	1.41045	0.113527	12.4239	1.94e-35	7.53e-33	LOC5575142	AaeL_AAEL015010, AAEL015010	acetyl-coenzyme A synthetase	LOW QUALITY PROTEIN: acetyl-coenzyme A synthetase		2	NC_035108.1	124644642	124679540	minus	7
LOC5578560	150.572	-4.10282	0.330354	-12.4195	2.05e-35	7.75e-33	LOC5578560	AaeL_AAEL003576, AAEL003576	shematrin-like protein 1	shematrin-like protein 1		3	NC_035109.1	87439933	87467699	minus	3
LOC5568497	155.963	3.23047	0.265497	12.1676	4.62e-34	1.7e-31	LOC5568497		uncharacterized LOC5568497	uncharacterized protein LOC5568497		2	NC_035108.1	340163083	340163745	minus	2
LOC5564012	1189.72	1.59594	0.131232	12.1612	5e-34	1.8e-31	LOC5564012	AaeL_AAEL014275, AAEL014275	mitochondrial amidoxime-reducing component 1	mitochondrial amidoxime-reducing component 1		1	NC_035107.1	83833636	83835141	minus	3
LOC5574655	2559.35	1.22788	0.101413	12.1078	9.6e-34	3.37e-31	LOC5574655		uncharacterized LOC5574655			2	NC_035108.1	329117515	329118756	minus	2
LOC5567396	589.218	2.11896	0.175345	12.0845	1.28e-33	4.37e-31	LOC5567396	AaeL_AAEL006053, AAEL006053	uncharacterized LOC5567396	uncharacterized protein LOC5567396		3	NC_035109.1	74130656	74256719	minus	6
LOC5572111	18042.2	1.46837	0.121564	12.079	1.36e-33	4.56e-31	LOC5572111	AaeL_AAEL000392, AAEL000392, MAL1, MALT_AEDAE	probable maltase	probable maltase|MAL I|maltase-like alpha-1,4-glucosidase		3	NC_035109.1	97653078	97655085	plus	3
LOC110676586	1279.79	-2.5237	0.209116	-12.0684	1.55e-33	5.07e-31	LOC110676586		uncharacterized LOC110676586	uncharacterized protein LOC110676586		2	NC_035108.1	270211900	270213088	plus	2
LOC5575174	2034.8	2.497	0.207021	12.0616	1.68e-33	5.38e-31	LOC5575174	AaeL_AAEL000311, AAEL000311	A-agglutinin anchorage subunit	A-agglutinin anchorage subunit		2	NC_035108.1	367910612	367956207	plus	6
LOC5566301	554.7	1.55681	0.129743	11.9992	3.59e-33	1.12e-30	LOC5566301	AaeL_AAEL005293, AAEL005293, GALE8B_a	galectin-4	galectin-4		3	NC_035109.1	308480159	308489547	plus	3
LOC5564283	181.881	2.96423	0.24762	11.9709	5.05e-33	1.54e-30	LOC5564283	AaeL_AAEL014386, AAEL014386	serine protease easter	serine protease easter		2	NC_035108.1	132577173	132578638	minus	3
LOC5566258	686.943	3.62235	0.303007	11.9547	6.14e-33	1.84e-30	LOC5566258	AaeL_AAEL015116, AAEL013498, AAEL015116, PPO1, ProPO1	phenoloxidase 2	phenoloxidase 2|prophenoloxidase		2	NC_035108.1	199338898	199341601	minus	4
LOC5577104	533.325	1.60654	0.134474	11.9468	6.75e-33	1.98e-30	LOC5577104	AaeL_AAEL013004, AAEL013004	uncharacterized LOC5577104	uncharacterized protein LOC5577104		2	NC_035108.1	349075911	349091045	minus	8
LOC5566108	5994.31	-1.46798	0.124713	-11.7709	5.51e-32	1.59e-29	LOC5566108	AaeL_AAEL005181, AAEL005181	aspartyl/asparaginyl beta-hydroxylase	WASH complex subunit 2C|aspartyl/asparaginyl beta-hydroxylase|uncharacterized protein LOC5566108|putative aspartyl beta-hydroxylase		2	NC_035108.1	1465247	1561349	minus	17
LOC5574899	1725.71	-2.71438	0.230711	-11.7653	5.89e-32	1.65e-29	LOC5574899	AaeL_AAEL011504, AAEL011504	cuticle protein 8	cuticle protein 8		2	NC_035108.1	81793985	81796195	minus	4
LOC110678856	608.013	-3.43286	0.291811	-11.764	5.98e-32	1.65e-29	LOC110678856		uncharacterized LOC110678856			3	NC_035109.1	9272155	9272735	plus	2
LOC5568044	2581.44	1.82329	0.157382	11.5851	4.9e-31	1.33e-28	LOC5568044	AaeL_AAEL006485, AAEL006485	probable uridine nucleosidase 1	probable uridine nucleosidase 1|putative purine hydrolase|salivary purine nucleosidase		3	NC_035109.1	15966901	15986644	plus	3
LOC5566732	224.329	2.40545	0.209181	11.4994	1.33e-30	3.54e-28	LOC5566732	AaeL_AAEL005596, AAEL005596	trypsin epsilon	trypsin epsilon|putative serine protease		3	NC_035109.1	159909887	159911344	plus	4
LOC5566484	3834.17	1.30488	0.115003	11.3464	7.72e-30	2.02e-27	LOC5566484	AaeL_AAEL005401, AAEL005401	protein CREG1	protein CREG1		1	NC_035107.1	246219637	246232403	plus	4
LOC5568782	492.652	2.42515	0.21496	11.2819	1.61e-29	4.14e-27	LOC5568782	AaeL_AAEL007128, AAEL007128	facilitated trehalose transporter Tret1	facilitated trehalose transporter Tret1		2	NC_035108.1	266839057	266840954	plus	7
LOC5572655	362.973	5.23717	0.465678	11.2463	2.41e-29	6.09e-27	LOC5572655	AaeL_AAEL001837, AAEL001837	pancreatic lipase-related protein 2	pancreatic lipase-related protein 2		2	NC_035108.1	275774433	275792340	plus	3
LOC5580280	5745.58	-1.87858	0.167113	-11.2414	2.55e-29	6.33e-27	LOC5580280	AaeL_AAEL003006, AAEL003006	probable pseudouridine-5'-phosphatase	probable pseudouridine-5'-phosphatase		3	NC_035109.1	40058514	40085727	plus	6
LOC5578920	278.036	2.28317	0.203254	11.2331	2.81e-29	6.83e-27	LOC5578920	AaeL_AAEL003748, AAEL003748, CYP9AE1	cytochrome P450 9e2	cytochrome P450 9e2		1	NC_035107.1	249121707	249123454	minus	1
LOC5575386	84718.1	-1.19472	0.106598	-11.2078	3.73e-29	8.95e-27	LOC5575386	AaeL_AAEL011789, AAEL011789	probable citrate synthase 2, mitochondrial	probable citrate synthase 2, mitochondrial|CISY2_AEDAE		3	NC_035109.1	288778251	288818952	minus	6
LOC5575455	2309.77	-2.90197	0.259299	-11.1916	4.48e-29	1.06e-26	LOC5575455	AaeL_AAEL002654, AAEL002654	zonadhesin	zonadhesin		2	NC_035108.1	245638274	245649761	plus	3
LOC5572926	427.951	-2.94439	0.263176	-11.1879	4.67e-29	1.08e-26	LOC5572926	AaeL_AAEL010150, AAEL010150	uncharacterized LOC5572926	uncharacterized protein LOC5572926		2	NC_035108.1	264802769	264813992	plus	3
LOC5576726	957.635	-2.96077	0.265728	-11.1421	7.82e-29	1.78e-26	LOC5576726	AaeL_AAEL002972, AAEL002972, CHT1, chitinase	endochitinase	endochitinase		1	NC_035107.1	261341183	261351659	plus	5
LOC110674177	412.495	-1.76434	0.158941	-11.1006	1.25e-28	2.8e-26	LOC110674177		zinc finger protein OZF	zinc finger protein OZF		1	NC_035107.1	291136643	291138992	minus	1
LOC5563674	1698.91	2.24966	0.203017	11.0812	1.55e-28	3.42e-26	LOC5563674	AaeL_AAEL000556, AAEL000556, CTL25	perlucin	perlucin|putative salivary C-type lectin		3	NC_035109.1	386234951	386235846	plus	2
LOC5576966	50377.1	7.21843	0.652773	11.0581	2e-28	4.36e-26	LOC5576966	AaeL_AAEL014188, AAEL014188, AAEL801121, CHYM, CHYM1, CHYM2	trypsin-1	trypsin-1|chymotrypsin-like protease|chymotrypsin-like protein|putative chymotrypsin-like protein		2	NC_035108.1	355319721	355320790	plus	3
LOC5578211	209.975	2.34938	0.212941	11.033	2.65e-28	5.68e-26	LOC5578211	AaeL_AAEL003457, AAEL003457	uncharacterized LOC5578211	uncharacterized protein LOC5578211		2	NC_035108.1	15132745	15134234	minus	5
LOC5571689	1021.59	2.25546	0.206743	10.9095	1.04e-27	2.19e-25	LOC5571689	AaeL_AAEL009219, AAEL009219	flocculation protein FLO11	flocculation protein FLO11		2	NC_035108.1	112980244	112985662	minus	2
LOC110680394	1425.17	-1.25326	0.115591	-10.8422	2.17e-27	4.53e-25	LOC110680394		neurofilament heavy polypeptide-like	neurofilament heavy polypeptide-like		Un	NW_018734718.1	3772	45802	minus	4
LOC5578329	475.144	-2.41303	0.222664	-10.8371	2.3e-27	4.72e-25	LOC5578329	AaeL_AAEL013649, AAEL013649	elongation of very long chain fatty acids protein 1	elongation of very long chain fatty acids protein 1		2	NC_035108.1	217887246	217911295	minus	5
LOC5578505	1710.63	3.71052	0.344397	10.774	4.57e-27	9.25e-25	LOC5578505	AaeL_AAEL013703, AAEL013703	trypsin-1	trypsin-1		3	NC_035109.1	307745997	307746866	plus	1
LOC23687556	791.709	1.62303	0.151796	10.6922	1.11e-26	2.21e-24	LOC23687556	AaeL_AAEL017136, AAEL017136, CYP325V1	cytochrome P450 4c21	cytochrome P450 4c21		3	NC_035109.1	112513177	112534429	plus	6
LOC5577611	789.706	-2.01064	0.188784	-10.6505	1.73e-26	3.42e-24	LOC5577611	AaeL_AAEL003216, AAEL003216	endocuticle structural glycoprotein SgAbd-2	endocuticle structural glycoprotein SgAbd-2		2	NC_035108.1	366622775	366638831	minus	3
LOC5575278	30748.6	-1.72668	0.16229	-10.6394	1.95e-26	3.79e-24	LOC5575278	AaeL_AAEL011741, AAEL011741, GSTS1	glutathione S-transferase	glutathione S-transferase		3	NC_035109.1	291058554	291082346	plus	8
LOC5564443	111847	-1.81778	0.170954	-10.6332	2.09e-26	4e-24	LOC5564443	AaeL_AAEL004249, AAEL004249	flightin	flightin		2	NC_035108.1	118669190	118687796	minus	5
LOC5577061	19380.3	-1.02726	0.0967089	-10.6221	2.35e-26	4.45e-24	LOC5577061	AaeL_AAEL003103, AAEL003103	ubiquitin-conjugating enzyme E2-17 kDa	ubiquitin-conjugating enzyme E2-17 kDa		1	NC_035107.1	119031934	119072876	plus	7
LOC5578300	5285.7	1.49873	0.141923	10.5601	4.56e-26	8.51e-24	LOC5578300	AaeL_AAEL013612, AAEL013612	slit homolog 1 protein	neurogenic locus notch homolog protein 3|slit homolog 1 protein		3	NC_035109.1	195195834	195222992	minus	11
LOC5577066	16029.2	-1.15427	0.109477	-10.5435	5.44e-26	1e-23	LOC5577066	AaeL_AAEL003104, AAEL003104	RING finger protein nhl-1	RING finger protein nhl-1		2	NC_035108.1	43026632	43218071	plus	15
LOC5577668	626.486	2.23477	0.214202	10.433	1.75e-25	3.19e-23	LOC5577668	AaeL_AAEL013899, AAEL013899	aminopeptidase N	aminopeptidase N		Un	NW_018734864.1	7480	9896	plus	4
LOC5575161	4534.25	-2.35935	0.2272	-10.3845	2.92e-25	5.24e-23	LOC5575161	AaeL_AAEL000354, AAEL000354	trans-1,2-dihydrobenzene-1,2-diol dehydrogenase	trans-1,2-dihydrobenzene-1,2-diol dehydrogenase		2	NC_035108.1	368910415	368919533	minus	4
LOC5571861	911.605	-1.70243	0.164138	-10.3719	3.33e-25	5.9e-23	LOC5571861	AaeL_AAEL009333, AAEL009333, AAEL801141	uncharacterized LOC5571861	uncharacterized protein LOC5571861		2	NC_035108.1	404722280	404723280	plus	2
LOC110681201	177.607	-3.59304	0.347373	-10.3435	4.48e-25	7.85e-23	LOC110681201		protein NPC2 homolog	protein NPC2 homolog		Un	NW_018736247.1	41980	55354	minus	4
LOC5572149	210.623	2.27409	0.220968	10.2915	7.7e-25	1.33e-22	LOC5572149	AaeL_AAEL009567, AAEL009567	apolipoprotein D	apolipoprotein D		3	NC_035109.1	119490100	119491926	minus	3
LOC5569108	1692.03	2.37655	0.230952	10.2902	7.8e-25	1.33e-22	LOC5569108		uncharacterized LOC5569108	uncharacterized protein LOC5569108		2	NC_035108.1	234447361	234456696	plus	6
LOC5571377	203.047	-2.82354	0.275138	-10.2622	1.04e-24	1.76e-22	LOC5571377	AaeL_AAEL008970, AAEL008970	uncharacterized LOC5571377	uncharacterized protein LOC5571377		2	NC_035108.1	178669978	178746966	plus	4
LOC5565479	1690.91	2.38044	0.232382	10.2437	1.26e-24	2.11e-22	LOC5565479		uncharacterized LOC5565479	uncharacterized protein LOC5565479		Un	NW_018736623.1	1649	10980	plus	6
LOC5576417	772.85	1.62839	0.159142	10.2323	1.42e-24	2.35e-22	LOC5576417	AaeL_AAEL012505, AAEL012505, AAEL012506	uncharacterized LOC5576417	uncharacterized protein LOC5576417		2	NC_035108.1	76262424	76296157	minus	3
LOC5564606	981.767	1.82522	0.179466	10.1703	2.69e-24	4.4e-22	LOC5564606	AaeL_AAEL014526, AAEL014526	sideroflexin-1	sideroflexin-1		1	NC_035107.1	224308884	224330511	plus	5
LOC5575552	479.496	3.78864	0.373022	10.1566	3.1e-24	5e-22	LOC5575552	AaeL_AAEL002675, AAEL002675	arginase, hepatic	arginase, hepatic		2	NC_035108.1	433886363	433887812	plus	1
LOC5580055	4939.66	-1.75852	0.173803	-10.1179	4.6e-24	7.35e-22	LOC5580055	AaeL_AAEL002166, AAEL002166	leucine-rich repeat flightless-interacting protein 2	leucine-rich repeat flightless-interacting protein 2		1	NC_035107.1	102067109	102224222	minus	12
LOC5565293	406.378	1.83031	0.181634	10.0769	6.99e-24	1.1e-21	LOC5565293	AaeL_AAEL010487, AAEL010487	protein THEM6	protein THEM6		1	NC_035107.1	278632117	278666759	plus	3
LOC5569147	4196.03	-1.75445	0.174474	-10.0557	8.67e-24	1.36e-21	LOC5569147	AaeL_AAEL007410, AAEL007410	protein phosphatase inhibitor 2	protein phosphatase inhibitor 2		2	NC_035108.1	12635148	12655531	minus	6
LOC5572569	605.699	1.70631	0.16972	10.0537	8.85e-24	1.37e-21	LOC5572569	AaeL_AAEL009881, AAEL009881	dynein heavy chain 5, axonemal	dynein heavy chain 5, axonemal		3	NC_035109.1	122448329	122538085	plus	16
LOC5569140	217.508	2.7886	0.277913	10.0341	1.08e-23	1.65e-21	LOC5569140	AaeL_AAEL007394, AAEL007394	uncharacterized LOC5569140	uncharacterized protein LOC5569140|short salivary D7 protein		3	NC_035109.1	408500467	408501376	plus	2
LOC5571859	2214.49	-1.98849	0.198616	-10.0117	1.35e-23	2.05e-21	LOC5571859	AaeL_AAEL009338, AAEL009338, AAEL801140	uncharacterized LOC5571859	uncharacterized protein LOC5571859		2	NC_035108.1	404712124	404713749	plus	3
LOC5572910	544.143	2.53217	0.253431	9.99158	1.66e-23	2.48e-21	LOC5572910	AaeL_AAEL010128, AAEL010128	protein artichoke	protein artichoke		2	NC_035108.1	161737441	161739238	plus	2
LOC5571857	2619.22	-1.57486	0.157639	-9.99024	1.68e-23	2.49e-21	LOC5571857	AaeL_AAEL009334, AAEL009334, AAEL801142	adenylate kinase isoenzyme 5	adenylate kinase isoenzyme 5|uncharacterized protein LOC5571857		2	NC_035108.1	404723258	404788657	plus	13
LOC5569903	5437.88	1.65867	0.166326	9.97243	2.01e-23	2.95e-21	LOC5569903	AaeL_AAEL007986, AAEL007986	uncharacterized LOC5569903	uncharacterized protein LOC5569903		2	NC_035108.1	36769530	36770197	plus	1
LOC5573745	1019.15	-1.48733	0.149356	-9.9583	2.32e-23	3.37e-21	LOC5573745	AaeL_AAEL000259, AAEL000259, CUSOD4	superoxide dismutase [Cu-Zn]	superoxide dismutase [Cu-Zn]		3	NC_035109.1	265359753	265360364	minus	1
LOC5578897	893.578	2.42943	0.24413	9.95136	2.49e-23	3.58e-21	LOC5578897		aminopeptidase N	aminopeptidase N		1	NC_035107.1	290674474	290702264	plus	5
LOC5568418	4039.22	-1.44373	0.14516	-9.94585	2.63e-23	3.74e-21	LOC5568418	AaeL_AAEL006847, AAEL006847	DCN1-like protein 4	DCN1-like protein 4		3	NC_035109.1	4135101	4181987	minus	7
LOC5576407	2609.28	-1.72498	0.173707	-9.93039	3.07e-23	4.33e-21	LOC5576407	AaeL_AAEL012500, AAEL012500	ubiquitin-protein ligase E3A	ubiquitin-protein ligase E3A		3	NC_035109.1	242375271	242435356	plus	6
LOC5571025	1512.18	2.35145	0.237133	9.91617	3.54e-23	4.94e-21	LOC5571025	AaeL_AAEL008753, AAEL008753	dynein assembly factor 1, axonemal homolog	dynein assembly factor 1, axonemal homolog		3	NC_035109.1	326959568	326960678	plus	2
LOC5575400	21076.8	1.06996	0.108147	9.89353	4.44e-23	6.14e-21	LOC5575400	AaeL_AAEL011802, AAEL011802	venom allergen 5	venom allergen 5		3	NC_035109.1	35956161	35960385	minus	3
LOC5564398	172.461	4.98055	0.506493	9.83341	8.08e-23	1.11e-20	LOC5564398	AaeL_AAEL004239, AAEL004239	uncharacterized LOC5564398	uncharacterized protein LOC5564398		1	NC_035107.1	104637803	104638829	minus	2
LOC5577951	596.553	-1.31534	0.133906	-9.82285	8.98e-23	1.22e-20	LOC5577951	AaeL_AAEL013430, AAEL013430	prostaglandin E2 receptor EP4 subtype	prostaglandin E2 receptor EP4 subtype		3	NC_035109.1	153267484	153341470	minus	5
LOC5567309	3111.87	-1.76483	0.179865	-9.81196	1e-22	1.34e-20	LOC5567309	AaeL_AAEL005964, AAEL005964	actin, indirect flight muscle	actin, indirect flight muscle		3	NC_035109.1	227646427	227647887	plus	2
LOC5578655	888.783	-1.24716	0.12733	-9.79467	1.19e-22	1.58e-20	LOC5578655	AaeL_AAEL005781, AAEL005781	fibrous sheath CABYR-binding protein	fibrous sheath CABYR-binding protein		1	NC_035107.1	122001173	122060038	minus	5
LOC110680584	61465.7	-1.35929	0.138822	-9.79161	1.22e-22	1.61e-20	LOC110680584		troponin T, skeletal muscle-like	LOW QUALITY PROTEIN: troponin T, skeletal muscle-like		Un	NW_018735069.1	321	7652	plus	8
LOC5574260	455.744	-1.44459	0.147569	-9.78921	1.25e-22	1.64e-20	LOC5574260	AaeL_AAEL011030, AAEL011030, AAEL011033	glutenin, high molecular weight subunit DX5	glutenin, high molecular weight subunit DX5|glutenin, high molecular weight subunit PW212		3	NC_035109.1	299989858	300181369	plus	8
LOC110680285	1167.23	2.2201	0.227352	9.76505	1.59e-22	2.06e-20	LOC110680285		uncharacterized LOC110680285	LOW QUALITY PROTEIN: uncharacterized protein LOC110680285		Un	NW_018734587.1	131999	149731	minus	19
LOC5572681	15460	2.3341	0.239174	9.75903	1.69e-22	2.17e-20	LOC5572681	AaeL_AAEL009955, AAEL009955, apoLp2	apolipophorins	apolipophorins|apolipophorin II		3	NC_035109.1	77687304	77708562	plus	10
LOC5580214	2060.79	1.25928	0.129156	9.75007	1.84e-22	2.34e-20	LOC5580214	AaeL_AAEL011918, AAEL011918, iPLA-1, iPLA-2, iPLA-3	patatin-like phospholipase domain-containing protein 3	patatin-like phospholipase domain-containing protein 3|uncharacterized protein LOC5580214		3	NC_035109.1	350986650	351054970	plus	11
LOC5569989	11723.4	-1.94429	0.201348	-9.65639	4.62e-22	5.82e-20	LOC5569989	AaeL_AAEL008066, AAEL008066	muscle M-line assembly protein unc-89	muscle M-line assembly protein unc-89		2	NC_035108.1	230211060	230376863	plus	8
LOC5569681	57220.6	7.5234	0.781539	9.62639	6.19e-22	7.73e-20	LOC5569681	AaeL_AAEL007818, AAEL007818, TRY3_AEDAE	trypsin 3A1	trypsin 3A1|early trypsin|early trypsin-like protein|put. trypsin		2	NC_035108.1	272473958	272474917	plus	2
LOC5578161	475.743	2.17979	0.226515	9.62315	6.38e-22	7.91e-20	LOC5578161	AaeL_AAEL013542, AAEL013542	elongation of very long chain fatty acids protein AAEL008004-like	elongation of very long chain fatty acids protein AAEL008004-like		3	NC_035109.1	76869875	76882646	minus	4
LOC5576800	3114.22	2.27566	0.238475	9.54253	1.39e-21	1.71e-19	LOC5576800	AaeL_AAEL012783, AAEL012783, APN	aminopeptidase N	aminopeptidase N		1	NC_035107.1	290596275	290599476	plus	4
LOC5580166	12557.4	-0.816667	0.0858837	-9.50899	1.93e-21	2.35e-19	LOC5580166	AaeL_AAEL002542, AAEL002542	triosephosphate isomerase	triosephosphate isomerase		1	NC_035107.1	228539095	228540580	minus	3
LOC5565102	238.439	-2.57888	0.271401	-9.50213	2.06e-21	2.48e-19	LOC5565102	AaeL_AAEL004596, AAEL004595, AAEL004596	RNA polymerase II degradation factor 1	RNA polymerase II degradation factor 1|uncharacterized protein LOC5565102		2	NC_035108.1	34555440	34742806	plus	6
LOC5578940	144.412	-2.19113	0.230769	-9.49491	2.2e-21	2.64e-19	LOC5578940	AaeL_AAEL003772, AAEL003772	myb-like protein AA	myb-like protein AA		1	NC_035107.1	247971976	248000858	minus	7
LOC5569620	1327.91	1.28477	0.13587	9.4559	3.2e-21	3.8e-19	LOC5569620	AaeL_AAEL001252, AAEL001252	rap1 GTPase-GDP dissociation stimulator 1	rap1 GTPase-GDP dissociation stimulator 1		2	NC_035108.1	151971246	151992387	plus	7
LOC5574012	8670.63	-1.3016	0.137776	-9.44719	3.48e-21	4.1e-19	LOC5574012	AaeL_AAEL010854, AAEL010854	ubiquitin carboxyl-terminal hydrolase 2	serine-rich adhesin for platelets|ubiquitin carboxyl-terminal hydrolase 2		1	NC_035107.1	54979541	55042476	plus	11
LOC110681048	441.44	1.98884	0.210702	9.43911	3.76e-21	4.39e-19	LOC110681048		protein henna-like	LOW QUALITY PROTEIN: protein henna-like		Un	NW_018735952.1	26289	27740	plus	2
LOC5579868	1101.3	1.11858	0.118917	9.40643	5.13e-21	5.95e-19	LOC5579868	AaeL_AAEL005988, AAEL005988, LYSC6	uncharacterized LOC5579868	uncharacterized protein LOC5579868		2	NC_035108.1	7866997	7871090	plus	1
LOC5569780	694.922	2.70044	0.287129	9.40496	5.21e-21	5.99e-19	LOC5569780	AaeL_AAEL007926, AAEL007926	retinoid-inducible serine carboxypeptidase	retinoid-inducible serine carboxypeptidase		3	NC_035109.1	311960130	311974181	minus	4
LOC5572524	287.447	2.56119	0.272473	9.39978	5.47e-21	6.24e-19	LOC5572524		uncharacterized LOC5572524			3	NC_035109.1	18600201	18601181	minus	2
LOC5574604	47665.3	-1.26061	0.134221	-9.39211	5.88e-21	6.66e-19	LOC5574604		troponin T, skeletal muscle	troponin T, skeletal muscle		1	NC_035107.1	177017528	177042794	plus	12
LOC5578233	119.546	3.98551	0.425557	9.3654	7.58e-21	8.51e-19	LOC5578233	AaeL_AAEL013570, AAEL013570	uncharacterized LOC5578233	uncharacterized protein LOC5578233		2	NC_035108.1	61951389	61956318	plus	2
LOC5578306	1578.61	1.70609	0.182391	9.35401	8.44e-21	9.4e-19	LOC5578306	AaeL_AAEL013623, AAEL013623	trypsin eta	trypsin eta|serine protease IV		1	NC_035107.1	61829530	61831941	plus	3
LOC5576791	160.466	3.033	0.326083	9.3013	1.39e-20	1.53e-18	LOC5576791	AaeL_AAEL012786, AAEL012786	puromycin-sensitive aminopeptidase-like protein	puromycin-sensitive aminopeptidase-like protein		1	NW_018735449.1	18583	19288	minus	1
LOC5576515	194.59	-2.72544	0.293209	-9.29521	1.47e-20	1.61e-18	LOC5576515	AaeL_AAEL012573, AAEL012573	putative defense protein 3	putative defense protein 3		1	NC_035107.1	285227223	285227848	minus	1
LOC23687387	740.66	1.92951	0.207603	9.29424	1.48e-20	1.61e-18	LOC23687387	AaeL_AAEL016967, AAEL016967	solute carrier family 23 member 2	solute carrier family 23 member 2|uncharacterized protein LOC23687387		1	NC_035107.1	146441552	146498918	plus	5
LOC5580296	1109.2	1.82651	0.196614	9.28982	1.55e-20	1.67e-18	LOC5580296	AaeL_AAEL003012, AAEL003012	glutamyl aminopeptidase	glutamyl aminopeptidase		1	NC_035107.1	208417464	208420185	minus	2
LOC110678059	488.491	-1.35084	0.146012	-9.25155	2.21e-20	2.37e-18	LOC110678059	AaeL_AAEL009660, AAEL009660	serine/arginine repetitive matrix protein 2	serine/arginine repetitive matrix protein 2		3	NC_035109.1	269360055	269436885	minus	5
LOC5567232	761.254	-2.55636	0.277596	-9.20892	3.29e-20	3.51e-18	LOC5567232	AaeL_AAEL000879, AAEL000879, AAEL000909	cuticle protein	cuticle protein		3	NC_035109.1	332502995	332516375	minus	4
LOC5569179	120.263	-2.52652	0.274928	-9.18975	3.94e-20	4.16e-18	LOC5569179	AaeL_AAEL007437, AAEL007437	RNA polymerase II degradation factor 1	RNA polymerase II degradation factor 1		2	NC_035108.1	291293961	291308376	plus	2
LOC5572985	131134	-2.17554	0.23789	-9.14517	5.95e-20	6.25e-18	LOC5572985	AaeL_AAEL001951, AAEL001951	actin, indirect flight muscle	actin, indirect flight muscle|pupal-specific flight muscle actin		3	NC_035109.1	227584945	227588623	plus	3
LOC5575868	392.225	3.8584	0.422381	9.13486	6.55e-20	6.82e-18	LOC5575868	AaeL_AAEL012136, AAEL012136	cysteine-rich secretory protein LCCL domain-containing 1	cysteine-rich secretory protein LCCL domain-containing 1		1	NC_035107.1	141979952	142039031	minus	7
LOC23687817	50.3679	-4.18467	0.458708	-9.12273	7.33e-20	7.57e-18	LOC23687817	AaeL_AAEL017397, AAEL017397	cuticle protein 16.5	cuticle protein 16.5		2	NC_035108.1	86228548	86229260	minus	2
LOC5577949	466.858	1.55963	0.171115	9.11451	7.9e-20	8.11e-18	LOC5577949	AaeL_AAEL013432, AAEL013427, AAEL013432	uncharacterized LOC5577949	uncharacterized protein LOC5577949		3	NC_035109.1	153236647	153259100	minus	12
LOC5567529	1693.22	-1.09606	0.120572	-9.09049	9.86e-20	1e-17	LOC5567529	AaeL_AAEL006150, AAEL006150	BRCA1-associated protein	BRCA1-associated protein		3	NC_035109.1	68760444	68791036	minus	4
LOC5570584	68.8422	5.55859	0.611496	9.09015	9.89e-20	1e-17	LOC5570584	AaeL_AAEL008409, AAEL008409	NTF2-related export protein	NTF2-related export protein		2	NC_035108.1	119912108	119912743	minus	2
LOC5572533	1225.98	1.31722	0.145094	9.07837	1.1e-19	1.11e-17	LOC5572533	AaeL_AAEL009861, AAEL009861	uncharacterized LOC5572533	uncharacterized protein LOC5572533		2	NC_035108.1	164053525	164094200	minus	4
LOC5568472	15252	-0.881437	0.0971126	-9.07644	1.12e-19	1.12e-17	LOC5568472	AaeL_AAEL006895, AAEL006895	ATP-dependent 6-phosphofructokinase	ATP-dependent 6-phosphofructokinase		2	NC_035108.1	25671471	25726965	plus	10
LOC110679237	226.413	-2.04682	0.225548	-9.07486	1.14e-19	1.13e-17	LOC110679237		cuticle protein 16.5-like	cuticle protein 16.5-like		3	NC_035109.1	29108337	29109545	minus	2
LOC5568814	50539.4	1.90898	0.210999	9.04733	1.47e-19	1.44e-17	LOC5568814	AaeL_AAEL001194, AAEL001194	fatty acid synthase	fatty acid synthase		2	NC_035108.1	307544012	307601765	minus	11
LOC5567399	1185.13	-1.00897	0.111794	-9.02528	1.79e-19	1.75e-17	LOC5567399	AaeL_AAEL006056, AAEL006056	nuclear protein localization protein 4 homolog	nuclear protein localization protein 4 homolog		3	NC_035109.1	74327860	74429118	minus	11
LOC5577230	2023.88	0.99202	0.110038	9.01522	1.96e-19	1.91e-17	LOC5577230	AaeL_AAEL003133, AAEL003133	Ig-like and fibronectin type-III domain-containing protein 1	Ig-like and fibronectin type-III domain-containing protein 1		3	NC_035109.1	270195740	270839128	plus	18
LOC5577771	396.525	1.93092	0.214313	9.0098	2.06e-19	1.99e-17	LOC5577771	AaeL_AAEL003318, AAEL003318	peptide transporter family 1	peptide transporter family 1		3	NC_035109.1	330308365	330322360	plus	6
LOC5580231	138961	-1.24375	0.138166	-9.00186	2.22e-19	2.13e-17	LOC5580231	AaeL_AAEL012207, AAEL012207	myosin light chain alkali	myosin light chain alkali		1	NC_035107.1	160909374	160911857	plus	6
LOC5568897	991.099	-1.87001	0.20784	-8.99734	2.31e-19	2.2e-17	LOC5568897	AaeL_AAEL007213, AAEL007213	acyl-CoA Delta(11) desaturase	acyl-CoA Delta(11) desaturase		1	NC_035107.1	267804172	267870869	minus	7
LOC5572815	328.245	2.32839	0.259648	8.9675	3.03e-19	2.87e-17	LOC5572815	AaeL_AAEL001897, AAEL001897	uncharacterized LOC5572815	uncharacterized protein LOC5572815		2	NC_035108.1	390859377	390860493	plus	2
LOC110681455	67.3077	3.40701	0.380004	8.96573	3.08e-19	2.88e-17	LOC110681455		venom allergen 5-like	venom allergen 5-like		Un	NW_018736644.1	20983	22143	minus	5
LOC5576983	67.3077	3.40701	0.380004	8.96573	3.08e-19	2.88e-17	LOC5576983	AaeL_AAEL003057, AAEL003057	venom allergen 5	venom allergen 5		2	NC_035108.1	212826179	212827334	plus	5
LOC110675149	250.462	-2.28047	0.255175	-8.93689	4e-19	3.71e-17	LOC110675149		uncharacterized protein KIAA0754-like	uncharacterized protein KIAA0754-like		2	NC_035108.1	173017197	173019221	minus	1
LOC5574015	64840	-1.22688	0.137381	-8.93044	4.24e-19	3.91e-17	LOC5574015	AaeL_AAEL010850, AAEL010850	troponin I	troponin I		1	NC_035107.1	54682892	54705856	minus	14
LOC23687958	156.064	-2.05351	0.230279	-8.91751	4.77e-19	4.37e-17	LOC23687958	AaeL_AAEL017538, AAEL017538	uncharacterized LOC23687958	uncharacterized protein LOC23687958		3	NC_035109.1	256171499	256173386	plus	1
LOC5566270	134.963	2.69508	0.302582	8.90695	5.25e-19	4.77e-17	LOC5566270	AaeL_AAEL000733, AAEL000733	3 beta-hydroxysteroid dehydrogenase/Delta 5-->4-isomerase	3 beta-hydroxysteroid dehydrogenase/Delta 5-->4-isomerase|3 beta hydroxysteroid dehydrogenase		2	NC_035108.1	55130648	55210893	plus	4
LOC5575310	155.537	-2.04747	0.229979	-8.90286	5.44e-19	4.92e-17	LOC5575310		uncharacterized LOC5575310	uncharacterized protein LOC5575310		3	NC_035109.1	256178855	256180742	plus	1
LOC5569163	946.124	1.88137	0.211592	8.8915	6.03e-19	5.42e-17	LOC5569163	AaeL_AAEL007416, AAEL007416	cysteine dioxygenase type 1	cysteine dioxygenase type 1		2	NC_035108.1	134635223	134665941	minus	4
LOC5577659	247.941	1.80884	0.203538	8.88698	6.28e-19	5.61e-17	LOC5577659	AaeL_AAEL003253, AAEL003253, CLIPB13B	melanization protease 1	melanization protease 1		1	NC_035107.1	290932690	290934146	minus	4
LOC110678855	1281.43	-2.02455	0.228465	-8.86153	7.89e-19	7e-17	LOC110678855		uncharacterized LOC110678855			3	NC_035109.1	9350312	9351491	plus	3
LOC5575704	577.39	1.17305	0.132664	8.84225	9.38e-19	8.27e-17	LOC5575704	AaeL_AAEL012019, AAEL012019	muskelin	muskelin		2	NC_035108.1	186569197	186590397	plus	6
LOC5573422	682.108	-1.4176	0.160363	-8.83996	9.58e-19	8.39e-17	LOC5573422	AaeL_AAEL002043, AAEL002043, CYP305A5	probable cytochrome P450 305a1	probable cytochrome P450 305a1		2	NC_035108.1	119686613	119701198	plus	3
LOC110674624	67.6765	-4.45013	0.503938	-8.83071	1.04e-18	9.06e-17	LOC110674624		uncharacterized LOC110674624			1	NC_035107.1	226605708	226606283	minus	3
LOC5575669	2642.18	1.78872	0.202587	8.82939	1.05e-18	9.11e-17	LOC5575669	AaeL_AAEL002688, AAEL002688	UDP-glucuronosyltransferase 2B37	UDP-glucuronosyltransferase 2B37		2	NC_035108.1	464868089	464912877	plus	5
LOC5567950	1712.78	1.8403	0.208721	8.817	1.18e-18	1.01e-16	LOC5567950	AaeL_AAEL006390, AAEL006390	V-type proton ATPase 116 kDa subunit a	V-type proton ATPase 116 kDa subunit a|V-ATPase 110 kDa integral membrane subunit		3	NC_035109.1	231626415	231651551	plus	7
LOC5568735	1309.02	1.089	0.124157	8.77117	1.77e-18	1.51e-16	LOC5568735	AaeL_AAEL007086, AAEL007086, AAEL007087	chaoptin	chaoptin		2	NC_035108.1	128265984	128343758	minus	4
LOC5569835	233.773	-1.93987	0.221316	-8.76518	1.86e-18	1.59e-16	LOC5569835	AaeL_AAEL007932, AAEL007932	proline-rich extensin-like protein EPR1	proline-rich extensin-like protein EPR1		3	NC_035109.1	61348315	61541800	plus	4
LOC5567884	75.2538	4.59643	0.526936	8.72294	2.71e-18	2.29e-16	LOC5567884	AaeL_AAEL006344, AAEL006344	sulfotransferase family cytosolic 1B member 1	sulfotransferase family cytosolic 1B member 1		3	NC_035109.1	396835071	396836510	minus	3
LOC5566251	1100.54	2.63693	0.302511	8.71679	2.86e-18	2.41e-16	LOC5566251	AaeL_AAEL015110, AAEL015110	venom dipeptidyl peptidase 4	venom dipeptidyl peptidase 4		2	NC_035108.1	335132634	335161753	minus	11
LOC23687884	200.939	-1.69686	0.194752	-8.71291	2.96e-18	2.47e-16	LOC23687884	AaeL_AAEL017464, AAEL017464	keratin, type II cytoskeletal 1	keratin, type II cytoskeletal 1		3	NC_035109.1	26328548	26332528	plus	2
LOC110681558	226.086	-2.26804	0.260523	-8.70575	3.15e-18	2.61e-16	LOC110681558	AaeL_AAEL004564, AAEL004564	uncharacterized LOC110681558	uncharacterized protein LOC110681558		1	NC_035107.1	220569251	220599836	plus	4
LOC5578050	3642.54	1.62808	0.187019	8.70545	3.16e-18	2.61e-16	LOC5578050	AaeL_AAEL013484, AAEL013484	uncharacterized LOC5578050	uncharacterized protein LOC5578050		2	NC_035108.1	23599532	23627857	minus	4
LOC5564018	1584.09	-1.0225	0.117919	-8.67117	4.28e-18	3.51e-16	LOC5564018	AaeL_AAEL013078, AAEL013078	probable Dol-P-Man:Man(7)GlcNAc(2)-PP-Dol alpha-1,6-mannosyltransferase	probable Dol-P-Man:Man(7)GlcNAc(2)-PP-Dol alpha-1,6-mannosyltransferase		1	NC_035107.1	31853732	31856705	minus	9
LOC5578604	3656.42	2.0012	0.231042	8.66164	4.65e-18	3.8e-16	LOC5578604	AaeL_AAEL003596, AAEL003596	uncharacterized LOC5578604	uncharacterized protein LOC5578604		2	NC_035108.1	125685869	125698683	plus	4
LOC5574916	223.667	3.3921	0.391771	8.65837	4.79e-18	3.89e-16	LOC5574916	AaeL_AAEL011519, AAEL011519	solute carrier family 45 member 4	solute carrier family 45 member 4		3	NC_035109.1	301024236	301039729	plus	7
LOC5576032	1043.16	-1.77537	0.205222	-8.65096	5.11e-18	4.12e-16	LOC5576032	AaeL_AAEL012268, AAEL012268, CHT2, chitinase	probable chitinase 10	probable chitinase 10		2	NC_035108.1	384387914	384414521	minus	10
LOC110676204	80.8714	3.101	0.358503	8.64986	5.16e-18	4.14e-16	LOC110676204		uncharacterized LOC110676204			2	NC_035108.1	171681169	171683555	plus	2
LOC5573929	2154.56	1.95303	0.225887	8.64605	5.33e-18	4.26e-16	LOC5573929	AaeL_AAEL002227, AAEL002200, AAEL002227	fatty acid synthase	fatty acid synthase		2	NC_035108.1	429256663	429264110	minus	6
LOC5568295	5250	1.47909	0.171828	8.60795	7.44e-18	5.91e-16	LOC5568295	AaeL_AAEL006719, AAEL006719, AMY1, AMY1_AEDAE, AmyI, amylase	alpha-amylase I	alpha-amylase I|1,4-alpha-D-glucan glucanohydrolase|AMY I		2	NC_035108.1	84902239	84904652	plus	2
LOC5576549	2453.12	0.923924	0.107586	8.58774	8.87e-18	7e-16	LOC5576549	AaeL_AAEL014887, AAEL014885, AAEL014887	translation initiation factor IF-2	uncharacterized protein LOC5576549		2	NC_035108.1	121341592	121735552	plus	8
LOC5572962	29216.4	-1.32392	0.154372	-8.57617	9.81e-18	7.7e-16	LOC5572962	AaeL_AAEL010180, AAEL010180	uncharacterized LOC5572962	uncharacterized protein LOC5572962		3	NC_035109.1	149179286	149180963	minus	4
LOC5573609	47.168	-3.49093	0.407686	-8.56278	1.1e-17	8.61e-16	LOC5573609	AaeL_AAEL002099, AAEL002099	larval cuticle protein A2B	larval cuticle protein A2B		3	NC_035109.1	177542658	177545185	minus	3
LOC5565953	1973.69	1.15159	0.134504	8.56173	1.11e-17	8.64e-16	LOC5565953	AaeL_AAEL005071, AAEL005071	GTP-binding protein 2	GTP-binding protein 2		1	NC_035107.1	294771437	294811438	plus	5
LOC5578063	635.948	3.39805	0.397495	8.54866	1.25e-17	9.62e-16	LOC5578063	AaeL_AAEL013496, AAEL006874, AAEL013496, AAEL017234, PPO8	phenoloxidase 2	phenoloxidase 2		2	NC_035108.1	199258894	199267086	minus	7
LOC5570911	4303.56	1.40142	0.164115	8.53922	1.35e-17	1.04e-15	LOC5570911	AaeL_AAEL001490, AAEL001490	acylphosphatase-2	acylphosphatase-2		2	NC_035108.1	262420488	262441187	minus	3
LOC5578661	551.679	2.29213	0.268624	8.53286	1.43e-17	1.09e-15	LOC5578661	AaeL_AAEL013812, AAEL013812	location of vulva defective 1	location of vulva defective 1		1	NC_035107.1	140577564	140580011	minus	1
LOC5568416	7516.56	2.04723	0.240088	8.527	1.5e-17	1.14e-15	LOC5568416	AaeL_AAEL006824, AAEL006824	cytochrome P450 4g15	cytochrome P450 4g15		1	NC_035107.1	82804948	82813910	plus	3
LOC5577804	2512.98	-1.68416	0.197827	-8.51326	1.69e-17	1.28e-15	LOC5577804	AaeL_AAEL013387, AAEL011592, AAEL013387	serine-rich adhesin for platelets	uncharacterized protein LOC5577804		2	NC_035108.1	26631167	27204040	minus	16
LOC5571102	282.967	1.60628	0.189833	8.46155	2.64e-17	1.99e-15	LOC5571102	AaeL_AAEL001517, AAEL001517	venom carboxylesterase-6	bile salt-activated lipase|venom carboxylesterase-6		3	NC_035109.1	260732126	260770846	plus	4
LOC5574465	399.257	-1.56651	0.185567	-8.44178	3.13e-17	2.34e-15	LOC5574465	AaeL_AAEL011183, AAEL011183	uncharacterized LOC5574465	uncharacterized protein LOC5574465		3	NC_035109.1	66729401	66730252	plus	2
LOC5576143	298.041	-1.77939	0.211288	-8.42163	3.71e-17	2.76e-15	LOC5576143	AaeL_AAEL014918, AAEL014918	lipase 1	lipase 1		1	NC_035107.1	303671873	303673638	plus	3
LOC5570329	126.147	-2.62073	0.311222	-8.42076	3.74e-17	2.77e-15	LOC5570329	AaeL_AAEL001391, AAEL001391	uncharacterized LOC5570329	uncharacterized protein LOC5570329		2	NC_035108.1	205974929	205993247	plus	3
LOC5566755	1098.55	-1.84808	0.219544	-8.41781	3.84e-17	2.83e-15	LOC5566755	AaeL_AAEL005621, AAEL005621, GPROP5	opsin-1	opsin-1		3	NC_035109.1	19559214	19560568	minus	1
LOC5575638	257.953	-1.92268	0.228507	-8.41406	3.96e-17	2.9e-15	LOC5575638	AaeL_AAEL011965, AAEL011965	coiled-coil domain-containing protein 63	coiled-coil domain-containing protein 63		3	NC_035109.1	45709509	45723964	minus	4
LOC5564415	492.123	1.90576	0.226694	8.40676	4.22e-17	3.08e-15	LOC5564415	AaeL_AAEL014426, AAEL014426	glycine dehydrogenase (decarboxylating), mitochondrial	LOW QUALITY PROTEIN: glycine dehydrogenase (decarboxylating), mitochondrial		1	NC_035107.1	159026490	159043037	plus	5
LOC5570479	1510.95	2.19511	0.261687	8.3883	4.93e-17	3.58e-15	LOC5570479	AaeL_AAEL001414, AAEL001414	leucine-rich repeat transmembrane protein FLRT3	leucine-rich repeat transmembrane neuronal protein 4|leucine-rich repeat transmembrane protein FLRT3		2	NC_035108.1	48256756	48258414	plus	2
LOC5573179	1313.05	-0.908516	0.10837	-8.38345	5.14e-17	3.71e-15	LOC5573179	AaeL_AAEL002014, AAEL002014	pyridine nucleotide-disulfide oxidoreductase domain-containing protein 1	pyridine nucleotide-disulfide oxidoreductase domain-containing protein 1		2	NC_035108.1	426581270	426588279	minus	4
CFP	710.81	12.8154	1.53459	8.35106	6.77e-17	4.86e-15
LOC5564759	205.478	2.13026	0.25597	8.32229	8.63e-17	6.17e-15	LOC5564759	AaeL_AAEL006804, AAEL006804, CYP9J18	probable cytochrome P450 9f2	probable cytochrome P450 9f2|putative cytochrome		3	NC_035109.1	368515392	368517299	plus	2
LOC5565793	44.0966	-4.79679	0.57923	-8.28133	1.22e-16	8.67e-15	LOC5565793	AaeL_AAEL014973, AAEL014973	cuticle protein 19	cuticle protein 19		2	NC_035108.1	178356640	178357180	minus	2
LOC5564210	2250.78	1.02421	0.123946	8.26332	1.42e-16	1e-14	LOC5564210	AaeL_AAEL009930, AAEL009930	uncharacterized LOC5564210	uncharacterized protein LOC5564210		1	NC_035107.1	307835672	308045382	minus	6
LOC5566757	1129.74	-1.73956	0.210622	-8.25914	1.47e-16	1.03e-14	LOC5566757	AaeL_AAEL005625, AAEL005625, GPROP4	opsin-1	opsin-1		3	NC_035109.1	19551977	19553332	plus	1
LOC5564514	12349.4	-1.9895	0.241049	-8.25351	1.54e-16	1.08e-14	LOC5564514	AaeL_AAEL004292, AAEL004292	circumsporozoite protein	circumsporozoite protein		2	NC_035108.1	293325027	293333699	plus	3
LOC110679247	130.803	2.31912	0.281135	8.24913	1.6e-16	1.11e-14	LOC110679247		uncharacterized LOC110679247	uncharacterized protein LOC110679247		3	NC_035109.1	284238794	284245524	plus	4
LOC5575733	1229.27	1.15872	0.140578	8.24256	1.69e-16	1.17e-14	LOC5575733	AaeL_AAEL012054, AAEL012054	sulfhydryl oxidase 1	sulfhydryl oxidase 1		2	NC_035108.1	16765779	16779078	plus	2
LOC5576915	215.491	-1.46562	0.177819	-8.24222	1.69e-16	1.17e-14	LOC5576915	AaeL_AAEL012866, AAEL012866	uncharacterized LOC5576915	uncharacterized protein LOC5576915		1	NC_035107.1	222054089	222054990	minus	2
LOC5571712	6901.75	1.75394	0.21291	8.23792	1.75e-16	1.21e-14	LOC5571712	AaeL_AAEL009244, AAEL009244	serine protease SP24D	serine protease SP24D		2	NC_035108.1	171684056	171695619	minus	4
LOC5574807	151.318	2.25363	0.274545	8.20858	2.24e-16	1.53e-14	LOC5574807	AaeL_AAEL002481, AAEL002481	probable chitinase 10	probable chitinase 10		2	NC_035108.1	78861883	78863404	plus	2
LOC5569663	286.188	2.40547	0.293066	8.20795	2.25e-16	1.53e-14	LOC5569663	AaeL_AAEL007807, AAEL007807, CYP4D38	cytochrome P450 4d1	cytochrome P450 4d1		3	NC_035109.1	152788167	152802023	plus	6
LOC5580173	149802	-1.22182	0.149387	-8.17891	2.86e-16	1.94e-14	LOC5580173	AaeL_AAEL002572, AAEL002572	myosin regulatory light chain 2	myosin regulatory light chain 2		1	NC_035107.1	229080495	229083168	minus	3
LOC5569630	929.19	1.51992	0.185934	8.17451	2.97e-16	2e-14	LOC5569630	AaeL_AAEL007780, AAEL007780	uncharacterized LOC5569630	uncharacterized protein LOC5569630|putative 30.5 kDa secreted protein second family member		3	NC_035109.1	133697076	133698187	plus	2
LOC5566120	118.129	-3.43775	0.420896	-8.1677	3.14e-16	2.11e-14	LOC5566120	AaeL_AAEL005188, AAEL005188	alpha-N-acetylgalactosaminidase	alpha-N-acetylgalactosaminidase		2	NC_035108.1	655754	660258	minus	7
LOC5576391	1447.51	1.16592	0.142777	8.16603	3.19e-16	2.13e-14	LOC5576391	AaeL_AAEL014891, AAEL014891, AAEL014892	uncharacterized LOC5576391	uncharacterized protein LOC5576391		1	NC_035107.1	271403322	271406949	minus	4
LOC110675720	75.876	-3.58884	0.44031	-8.15071	3.62e-16	2.41e-14	LOC110675720		cuticle protein 16.5-like	cuticle protein 16.5-like		2	NC_035108.1	86249613	86250491	plus	2
LOC5572427	651.749	-1.30862	0.160926	-8.13183	4.23e-16	2.8e-14	LOC5572427	AaeL_AAEL001816, AAEL001816	UDP-glucuronosyltransferase 2A3	UDP-glucuronosyltransferase 2A3		2	NC_035108.1	374754445	374756310	plus	2
LOC5566101	435.953	-2.05174	0.252536	-8.12454	4.49e-16	2.96e-14	LOC5566101	AaeL_AAEL005840, AAEL005840	zeta-sarcoglycan	uncharacterized protein LOC5566101|zeta-sarcoglycan		1	NC_035107.1	117568975	117892249	minus	9
LOC5577275	96.9484	-4.72783	0.582167	-8.12108	4.62e-16	3.03e-14	LOC5577275	AaeL_AAEL013118, AAEL013118	protein G12	protein G12		2	NC_035108.1	338404881	338405800	plus	3
LOC5574108	406.569	1.8837	0.232057	8.11741	4.76e-16	3.11e-14	LOC5574108	AaeL_AAEL002254, AAEL002254	ovochymase-2	ovochymase-2		2	NC_035108.1	30420446	30423780	minus	4
LOC5579954	103.676	7.18184	0.885443	8.11101	5.02e-16	3.26e-14	LOC5579954	AaeL_AAEL007591, AAEL007591	mite group 2 allergen Gly d 2.01	mite group 2 allergen Gly d 2.01		1	NC_035107.1	302955557	302956212	plus	2
LOC5577369	28064.1	-0.769801	0.0950899	-8.0955	5.7e-16	3.69e-14	LOC5577369	AaeL_AAEL000454, AAEL000454	probable isocitrate dehydrogenase [NAD] subunit alpha, mitochondrial	probable isocitrate dehydrogenase [NAD] subunit alpha, mitochondrial		3	NC_035109.1	186236629	186246530	minus	5
LOC5564984	746.105	1.19387	0.147497	8.0942	5.76e-16	3.72e-14	LOC5564984	AaeL_AAEL004518, AAEL004518, AAEL004540, CLIPC5A, CLIPC6	serine protease persephone	serine protease persephone		1	NC_035107.1	64326270	64371254	minus	7
LOC5574133	483.857	-1.32714	0.164034	-8.09068	5.93e-16	3.81e-14	LOC5574133	AaeL_AAEL010951, AAEL010951	cysteine sulfinic acid decarboxylase	cysteine sulfinic acid decarboxylase		3	NC_035109.1	167758086	167776777	plus	5
LOC5579505	240.806	2.38418	0.294762	8.0885	6.04e-16	3.86e-14	LOC5579505	AaeL_AAEL015136, AAEL015136	protein NPC2 homolog	protein NPC2 homolog		1	NC_035107.1	303073826	303074495	minus	2
LOC5564064	11313.6	1.3203	0.163301	8.08507	6.21e-16	3.95e-14	LOC5564064	AaeL_AAEL004054, AAEL004054, CYP4G36	cytochrome P450 4g15	cytochrome P450 4g15		1	NC_035107.1	135800509	135834197	minus	5
LOC5574499	602.846	1.18991	0.147255	8.08061	6.44e-16	4.08e-14	LOC5574499	AaeL_AAEL002390, AAEL002390	Krueppel homolog 1	Krueppel homolog 1		2	NC_035108.1	303297369	303375216	plus	6
LOC5568419	1003.2	-1.5569	0.192963	-8.06837	7.12e-16	4.49e-14	LOC5568419	AaeL_AAEL006845, AAEL006845	protein FRG1 homolog	protein FRG1 homolog		3	NC_035109.1	4115140	4135839	plus	3
LOC5567962	1265.92	1.32017	0.163777	8.06077	7.58e-16	4.76e-14	LOC5567962	AaeL_AAEL006411, AAEL006411, TIMELESS	protein timeless	protein timeless		2	NC_035108.1	414435531	414637024	minus	17
LOC5571997	1213.91	3.0491	0.378319	8.05962	7.65e-16	4.78e-14	LOC5571997	AaeL_AAEL009487, AAEL009487	uncharacterized LOC5571997	uncharacterized protein LOC5571997		1	NC_035107.1	98204366	98206763	minus	2
LOC5570330	462.578	5.30768	0.658896	8.05541	7.92e-16	4.93e-14	LOC5570330	AaeL_AAEL001392, AAEL001392	glycine-rich cell wall structural protein	glycine-rich cell wall structural protein		2	NC_035108.1	205927148	205928997	plus	4
LOC110675350	772.961	1.01627	0.126259	8.04909	8.34e-16	5.17e-14	LOC110675350		sulfhydryl oxidase 1-like	sulfhydryl oxidase 1-like		2	NC_035108.1	16789887	16791913	plus	1
LOC5570039	1182.02	2.1257	0.264352	8.04116	8.9e-16	5.49e-14	LOC5570039	AaeL_AAEL000165, AAEL000165	uncharacterized LOC5570039	uncharacterized protein LOC5570039		3	NC_035109.1	215582061	215624257	plus	4
LOC5574013	418.259	-1.03925	0.129301	-8.03741	9.18e-16	5.64e-14	LOC5574013	AaeL_AAEL010864, AAEL010864	tetratricopeptide repeat protein 17	tetratricopeptide repeat protein 17		1	NC_035107.1	54923068	54937551	minus	4
LOC5567626	69.8063	3.02196	0.377199	8.01157	1.13e-15	6.93e-14	LOC5567626	AaeL_AAEL006212, AAEL006212	TLR4 interactor with leucine rich repeats	TLR4 interactor with leucine rich repeats|protein artichoke|toll-like receptor 6		2	NC_035108.1	50162834	50201460	minus	5
LOC5571813	1296.42	-1.93509	0.241581	-8.01011	1.15e-15	6.98e-14	LOC5571813	AaeL_AAEL001683, AAEL001683	cuticle protein 16.5	cuticle protein 16.5		2	NC_035108.1	86005275	86006231	plus	2
LOC5576672	1266.64	1.19322	0.149042	8.00591	1.19e-15	7.19e-14	LOC5576672	AaeL_AAEL012702, AAEL012702	ATP-binding cassette sub-family A member 3	ATP-binding cassette sub-family A member 3		2	NC_035108.1	94177008	94183151	minus	11
LOC110674371	830.915	-1.50785	0.188704	-7.99056	1.34e-15	8.11e-14	LOC110674371		cuticle protein 21.3	cuticle protein 21.3		1	NC_035107.1	22081945	22095411	minus	5
LOC5571812	1767.76	-2.03584	0.254866	-7.98786	1.37e-15	8.26e-14	LOC5571812	AaeL_AAEL001677, AAEL001677	cuticle protein	cuticle protein		2	NC_035108.1	85966047	85966856	minus	1
LOC5580091	300.013	1.74313	0.218257	7.98662	1.39e-15	8.31e-14	LOC5580091	AaeL_AAEL002141, AAEL002141	neprilysin-2	neprilysin-2		1	NC_035107.1	243377285	243380987	plus	1
LOC5570781	373.557	1.8217	0.228358	7.9774	1.49e-15	8.91e-14	LOC5570781	AaeL_AAEL008527, AAEL008527	endothelin-converting enzyme 2	endothelin-converting enzyme 2		3	NC_035109.1	29267745	29275958	plus	13
LOC5571803	1408.97	2.39021	0.299863	7.97099	1.57e-15	9.35e-14	LOC5571803	AaeL_AAEL009330, AAEL009330	carbonic anhydrase	carbonic anhydrase		1	NC_035107.1	55277958	55279147	minus	2
LOC5575279	648.6	1.96746	0.247491	7.94963	1.87e-15	1.11e-13	LOC5575279	AaeL_AAEL011734, AAEL011734, TOLL9B	uncharacterized LOC5575279	uncharacterized protein LOC5575279		3	NC_035109.1	290779493	290821802	minus	6
LOC5569487	5581.51	-0.934697	0.117873	-7.92972	2.2e-15	1.29e-13	LOC5569487	AaeL_AAEL007678, AAEL007671, AAEL007678	uncharacterized LOC5569487	uncharacterized protein LOC5569487		3	NC_035109.1	407161799	407209582	plus	9
LOC5573655	44.0538	4.57467	0.576908	7.92964	2.2e-15	1.29e-13	LOC5573655	AaeL_AAEL010636, AAEL010636	uncharacterized LOC5573655	uncharacterized protein LOC5573655		3	NC_035109.1	121444253	121445099	plus	2
LOC110674453	509.82	-1.80259	0.228124	-7.90181	2.75e-15	1.61e-13	LOC110674453	AaeL_AAEL012715, AAEL012715	protein CutA homolog	protein CutA homolog		1	NC_035107.1	93106576	93107512	minus	2
LOC23687449	1639.4	1.65406	0.210178	7.86981	3.55e-15	2.07e-13	LOC23687449	AaeL_AAEL017029, AAEL017029	protein henna	protein henna|phenylalanine hydroxylase		2	NC_035108.1	6799065	6889674	minus	5
LOC110678030	40.7645	-5.70452	0.725793	-7.85971	3.85e-15	2.23e-13	LOC110678030		uncharacterized LOC110678030			3	NC_035109.1	265079008	265085217	minus	2
LOC5576876	9885.07	-2.00198	0.254764	-7.85818	3.9e-15	2.25e-13	LOC5576876	AaeL_AAEL003049, AAEL003049	cuticle protein 2	cuticle protein 2		1	NC_035107.1	130920943	130922491	plus	3
LOC5579486	346.287	1.18191	0.151189	7.8174	5.39e-15	3.1e-13	LOC5579486	AaeL_AAEL015294, AAEL015294	chymotrypsin-2	chymotrypsin-2|salivary chymotrypsin-like enzyme		2	NC_035108.1	93208338	93209488	minus	3
LOC5571772	47.1748	-3.16438	0.405305	-7.80739	5.84e-15	3.34e-13	LOC5571772	AaeL_AAEL009296, AAEL009296	histone H3-5	histone H3-5		2	NC_035108.1	17464317	17465492	minus	1
LOC5570233	38003.1	-0.757821	0.0973065	-7.78798	6.81e-15	3.88e-13	LOC5570233	AaeL_AAEL008166, AAEL008166	malate dehydrogenase, mitochondrial	malate dehydrogenase, mitochondrial		3	NC_035109.1	10076064	10091237	minus	3
LOC5568622	4022.2	1.96324	0.252332	7.78039	7.23e-15	4.11e-13	LOC5568622	AaeL_AAEL006968, AAEL006968	uncharacterized LOC5568622	uncharacterized protein LOC5568622		2	NC_035108.1	398747602	398748979	minus	2
LOC5579172	87026.8	-1.30412	0.16766	-7.77836	7.35e-15	4.16e-13	LOC5579172	AaeL_AAEL003877, AAEL003877, AAEL003888	polyubiquitin-C	polyubiquitin|polyubiquitin-C		3	NC_035109.1	84643785	84661591	plus	5
LOC110678815	396.642	-1.46218	0.188176	-7.77029	7.83e-15	4.41e-13	LOC110678815		spondin-2	spondin-2		3	NC_035109.1	326097894	326112805	plus	5
LOC110678273	219.221	1.46778	0.188938	7.76856	7.94e-15	4.46e-13	LOC110678273		solute carrier family 26 member 10-like	LOW QUALITY PROTEIN: solute carrier family 26 member 10-like		3	NC_035109.1	375801273	375845538	minus	8
LOC5570952	1981.69	-1.39701	0.179943	-7.76363	8.25e-15	4.62e-13	LOC5570952	AaeL_AAEL008680, AAEL008680, URM1_AEDAE	ubiquitin-related modifier 1 homolog	ubiquitin-related modifier 1 homolog		2	NC_035108.1	2667420	2704283	plus	6
LOC5578618	1245.83	1.34267	0.173274	7.7488	9.28e-15	5.17e-13	LOC5578618		uncharacterized LOC5578618			2	NC_035108.1	125654138	125655486	minus	2
LOC5572912	58.9874	-6.99334	0.903943	-7.73648	1.02e-14	5.67e-13	LOC5572912		cuticle protien	cuticle protien		2	NC_035108.1	161981360	161981625	plus	2
LOC5564380	1097.26	1.85268	0.239767	7.727	1.1e-14	6.09e-13	LOC5564380	AaeL_AAEL014413, AAEL014413, CYP304C1	probable cytochrome P450 304a1	probable cytochrome P450 304a1		1	NC_035107.1	286884241	286905138	plus	4
LOC5576440	2048.36	0.754926	0.0977485	7.72314	1.13e-14	6.25e-13	LOC5576440	AaeL_AAEL005536, AAEL005536	CD63 antigen	CD63 antigen		2	NC_035108.1	337120544	337131179	minus	5
LOC110681070	189.028	1.89655	0.24568	7.71959	1.17e-14	6.4e-13	LOC110681070		neprilysin-1-like	neprilysin-1-like		Un	NW_018736000.1	10349	17325	plus	7
LOC5578010	493.768	1.35794	0.17595	7.71776	1.18e-14	6.47e-13	LOC5578010	AaeL_AAEL003365, AAEL003365	acylpyruvase FAHD1, mitochondrial	acylpyruvase FAHD1, mitochondrial		3	NC_035109.1	80788553	80790987	minus	4
LOC5579646	546.416	-1.65098	0.214072	-7.71227	1.24e-14	6.73e-13	LOC5579646	AaeL_AAEL003978, AAEL003978	zinc finger protein 329	zinc finger protein 329		2	NC_035108.1	195882560	195951529	plus	4
LOC5565270	2584.36	-0.966214	0.12535	-7.70811	1.28e-14	6.93e-13	LOC5565270	AaeL_AAEL004691, AAEL004691	RING-box protein 1A	RING-box protein 1A|SCF ubiquitin ligase Rbx1 component		1	NC_035107.1	118834052	118849786	minus	4
LOC5577377	647.46	2.33373	0.302791	7.70741	1.28e-14	6.94e-13	LOC5577377	AaeL_AAEL000428, AAEL000428, T23O_AEDAE, TDO, TO, TRPO	tryptophan 2,3-dioxygenase	tryptophan 2,3-dioxygenase|Tryptamin 2,3-dioxygenase|Tryptophan pyrrolase|Tryptophanase|tryptophan oxygenase		3	NC_035109.1	186857871	186870670	plus	7
LOC5565743	218.002	1.46075	0.189854	7.69405	1.43e-14	7.67e-13	LOC5565743	AaeL_AAEL004958, AAEL004958	uncharacterized LOC5565743	uncharacterized protein LOC5565743		3	NC_035109.1	322754500	322766182	plus	9
LOC110681469	596.195	1.18256	0.154007	7.6786	1.61e-14	8.56e-13	LOC110681469		histone H1-like	histone H1-like		Un	NW_018736688.1	16201	17270	minus	1
LOC5575530	596.195	1.18256	0.154007	7.6786	1.61e-14	8.56e-13	LOC5575530	AaeL_AAEL011906, AAEL011906	histone H1	histone H1		3	NC_035109.1	337659583	337660652	minus	1
LOC5576266	4863.62	-1.18549	0.15439	-7.67859	1.61e-14	8.56e-13	LOC5576266	AaeL_AAEL012419, AAEL012419	26S proteasome non-ATPase regulatory subunit 11	26S proteasome non-ATPase regulatory subunit 11		3	NC_035109.1	111408128	111411882	minus	4
LOC5573117	652.502	1.03349	0.134652	7.67528	1.65e-14	8.75e-13	LOC5573117	AaeL_AAEL001960, AAEL001960	probable cytochrome P450 12a4, mitochondrial	probable cytochrome P450 12a4, mitochondrial		2	NC_035108.1	423973541	423975686	plus	7
LOC5575967	2479.36	-1.0541	0.137446	-7.66918	1.73e-14	9.15e-13	LOC5575967	AaeL_AAEL012217, AAEL012217	aminopeptidase N	aminopeptidase N		1	NC_035107.1	15171782	15214339	minus	6
LOC5566485	19899.5	-0.886624	0.11572	-7.66178	1.83e-14	9.65e-13	LOC5566485	AaeL_AAEL005422, AAEL005422	delta-1-pyrroline-5-carboxylate dehydrogenase, mitochondrial	delta-1-pyrroline-5-carboxylate dehydrogenase, mitochondrial		1	NC_035107.1	246018491	246056843	plus	7
LOC5576882	1355.01	0.82144	0.107246	7.65943	1.87e-14	9.8e-13	LOC5576882	AaeL_AAEL003035, AAEL003035, GPROP9_2	opsin-3	opsin-3		1	NC_035107.1	130264248	130275937	minus	2
LOC5570567	117.424	2.24513	0.293773	7.6424	2.13e-14	1.11e-12	LOC5570567	AaeL_AAEL008386, AAEL008386	ATP-binding cassette sub-family A member 3	ATP-binding cassette sub-family A member 3		3	NC_035109.1	224734279	224779573	plus	9
LOC5564093	1585.03	1.66163	0.217545	7.63808	2.2e-14	1.15e-12	LOC5564093	AaeL_AAEL014312, AAEL010965, AAEL014312	cubilin homolog	cubilin homolog		2	NC_035108.1	151406296	151461409	plus	14
LOC110680964	72.2742	-2.90166	0.381129	-7.61332	2.67e-14	1.39e-12	LOC110680964		serine protease snake-like	serine protease snake-like		Un	NW_018735738.1	17510	18658	plus	3
LOC5576468	697.526	1.1762	0.154603	7.6079	2.79e-14	1.44e-12	LOC5576468	AaeL_AAEL002903, AAEL002903	phosphatidylinositol 4,5-bisphosphate 3-kinase catalytic subunit	phosphatidylinositol 4,5-bisphosphate 3-kinase catalytic subunit beta isoform		1	NC_035107.1	108022082	108115053	minus	7
LOC5566341	1606.04	1.12649	0.14811	7.60578	2.83e-14	1.46e-12	LOC5566341	AaeL_AAEL005314, AAEL005314	uncharacterized LOC5566341	uncharacterized protein LOC5566341		2	NC_035108.1	64283339	64338772	minus	3
LOC5577357	582.778	2.62995	0.346418	7.59182	3.15e-14	1.62e-12	LOC5577357	AaeL_AAEL000471, AAEL000471	monocarboxylate transporter 5	monocarboxylate transporter 5		3	NC_035109.1	185574217	185632280	plus	6
LOC5565694	147.295	1.80418	0.237934	7.5827	3.38e-14	1.73e-12	LOC5565694	AaeL_AAEL004923, AAEL004923	neuronal acetylcholine receptor subunit beta-3	neuronal acetylcholine receptor subunit beta-3		2	NC_035108.1	260804290	260809890	minus	6
LOC5564268	4362.12	-1.0592	0.139693	-7.58235	3.39e-14	1.73e-12	LOC5564268	AaeL_AAEL014366, AAEL014366	protein takeout	protein takeout		3	NC_035109.1	75099955	75170886	plus	6
LOC5577761	1262.77	2.77585	0.367053	7.56253	3.95e-14	2.01e-12	LOC5577761	AaeL_AAEL003298, AAEL003298	membrane-bound alkaline phosphatase	membrane-bound alkaline phosphatase		3	NC_035109.1	340509384	340511163	minus	2
LOC5577631	757.397	0.913149	0.120833	7.55712	4.12e-14	2.09e-12	LOC5577631	AaeL_AAEL003229, AAEL003229	zinc finger FYVE domain-containing protein 26 homolog	zinc finger FYVE domain-containing protein 26 homolog		1	NC_035107.1	292309954	292320552	minus	5
LOC23687745	1533.83	1.4968	0.198443	7.54271	4.6e-14	2.32e-12	LOC23687745	AaeL_AAEL017325, AAEL017325, CLIPB36	serine protease easter	serine protease easter		3	NC_035109.1	104949202	104965650	plus	5
hSpCas9	56.532	9.16395	1.21521	7.54105	4.66e-14	2.34e-12
LOC5565436	808.131	1.50462	0.200045	7.52141	5.42e-14	2.71e-12	LOC5565436	AaeL_AAEL000640, AAEL000640	alanine--glyoxylate aminotransferase 2, mitochondrial	LOW QUALITY PROTEIN: alanine--glyoxylate aminotransferase 2, mitochondrial		3	NC_035109.1	395716130	395727653	minus	5
LOC5568046	3617.1	1.16304	0.155059	7.50061	6.35e-14	3.17e-12	LOC5568046	AaeL_AAEL006483, AAEL006483	uncharacterized LOC5568046	uncharacterized protein LOC5568046		3	NC_035109.1	15917719	15918749	plus	3
LOC5567942	1927.54	1.02115	0.136425	7.48505	7.15e-14	3.56e-12	LOC5567942	AaeL_AAEL006389, AAEL006389, CAT-L3	digestive cysteine proteinase 1	digestive cysteine proteinase 1|cathepsin L		3	NC_035109.1	231067194	231076200	minus	5
LOC5576161	3147.3	1.33386	0.179297	7.43939	1.01e-13	5.01e-12	LOC5576161	AaeL_AAEL012357, AAEL007259, AAEL012357	transmembrane protein 19	transmembrane protein 19		3	NC_035109.1	390244872	390280243	minus	8
LOC5577372	568.028	-1.25502	0.16876	-7.43674	1.03e-13	5.1e-12	LOC5577372	AaeL_AAEL000419, AAEL000419	larval cuticle protein A2B	larval cuticle protein A2B		3	NC_035109.1	186524814	186525958	minus	3
LOC5570845	1492.61	1.79583	0.241832	7.42593	1.12e-13	5.51e-12	LOC5570845	AaeL_AAEL008619, AAEL008619	kallikrein 1-related peptidase b3	kallikrein 1-related peptidase b3|trypsin-like salivary secreted protein		2	NC_035108.1	80529711	80530871	minus	2
LOC5574702	409.081	1.34215	0.180759	7.42507	1.13e-13	5.53e-12	LOC5574702	AaeL_AAEL011343, AAEL011343	protocadherin Fat 3	protocadherin Fat 3		2	NC_035108.1	92275139	92301680	minus	4
LOC5567310	187968	-1.0311	0.138933	-7.42154	1.16e-13	5.66e-12	LOC5567310	AaeL_AAEL005961, AAEL005961	actin-1-like	actin-1-like		3	NC_035109.1	227633288	227636145	plus	3
LOC5567877	4448.03	1.2414	0.16755	7.4091	1.27e-13	6.2e-12	LOC5567877	AaeL_AAEL006347, AAEL006347, ADPase, APY, APY_AEDAE	apyrase	apyrase|ATP-diphosphatase|ATP-diphosphohydrolase|Adenosine diphosphatase		3	NC_035109.1	396934755	396936963	plus	8
LOC5574026	1228.16	0.917265	0.123862	7.40554	1.31e-13	6.34e-12	LOC5574026	AaeL_AAEL010867, AAEL010867	serine protease snake	serine protease snake		2	NC_035108.1	383581099	383582351	minus	4
LOC5576634	682.069	-2.00266	0.270675	-7.39876	1.37e-13	6.65e-12	LOC5576634	AaeL_AAEL012654, AAEL012654	pancreatic triacylglycerol lipase	pancreatic triacylglycerol lipase		2	NC_035108.1	18656914	18754970	plus	10
LOC5574205	131.319	2.47102	0.334058	7.39698	1.39e-13	6.72e-12	LOC5574205	AaeL_AAEL002307, AAEL002307	leucine-rich repeat neuronal protein 3	leucine-rich repeat neuronal protein 3		3	NC_035109.1	373158581	373202353	plus	5
LOC5579299	139.217	2.18095	0.295637	7.37714	1.62e-13	7.77e-12	LOC5579299	AaeL_AAEL002482, AAEL002482	probable chitinase 10	probable chitinase 10		2	NC_035108.1	78891841	78892922	minus	2
LOC5564270	5016.36	-1.57662	0.213856	-7.37235	1.68e-13	8.03e-12	LOC5564270	AaeL_AAEL014369, AAEL014369	uncharacterized LOC5564270	uncharacterized protein LOC5564270		3	NC_035109.1	110873931	110908869	plus	4
LOC5568131	33186.8	-0.930982	0.126345	-7.36855	1.73e-13	8.24e-12	LOC5568131	AaeL_AAEL006575, AAEL006575	troponin C	troponin C		2	NC_035108.1	133366262	133417955	plus	8
LOC5579654	1455.95	2.27465	0.308768	7.36687	1.75e-13	8.31e-12	LOC5579654	AaeL_AAEL003970, AAEL003970	proton-coupled amino acid transporter-like protein pathetic	proton-coupled amino acid transporter-like protein pathetic		3	NC_035109.1	267115199	267205914	minus	9
LOC5571086	6131.54	1.51282	0.205397	7.36535	1.77e-13	8.38e-12	LOC5571086		uncharacterized LOC5571086			3	NC_035109.1	132519746	132533473	plus	3
LOC5574109	917.539	1.31224	0.17827	7.36096	1.83e-13	8.63e-12	LOC5574109	AaeL_AAEL002263, AAEL002263	uncharacterized LOC5574109	uncharacterized protein LOC5574109		2	NC_035108.1	30275476	30276405	minus	2
LOC5571602	88.7419	-1.98498	0.269767	-7.35814	1.86e-13	8.79e-12	LOC5571602	AaeL_AAEL009186, AAEL009186	uncharacterized LOC5571602	uncharacterized protein LOC5571602		2	NC_035108.1	96624558	96716256	minus	6
LOC5570581	920.844	-0.980912	0.133361	-7.35534	1.9e-13	8.95e-12	LOC5570581	AaeL_AAEL008393, AAEL008393	phosphatidylserine synthase 1	phosphatidylserine synthase 1		3	NC_035109.1	224459917	224491609	plus	6
LOC5577078	407.892	1.25939	0.171402	7.34758	2.02e-13	9.45e-12	LOC5577078	AaeL_AAEL012975, AAEL012975	uncharacterized LOC5577078	uncharacterized protein LOC5577078		2	NC_035108.1	124852691	124874987	minus	8
LOC5573200	2598.58	1.78335	0.242965	7.33994	2.14e-13	9.97e-12	LOC5573200	AaeL_AAEL001998, AAEL001998	uncharacterized LOC5573200	uncharacterized protein LOC5573200		2	NC_035108.1	425293957	425305240	minus	7
LOC5569083	4957.4	0.700752	0.0955855	7.33116	2.28e-13	1.06e-11	LOC5569083	AaeL_AAEL001209, AAEL001209	putative inorganic phosphate cotransporter	putative inorganic phosphate cotransporter		2	NC_035108.1	413387664	413425441	minus	8
LOC5574905	118.6	2.27173	0.311044	7.30358	2.8e-13	1.3e-11	LOC5574905	AaeL_AAEL011510, AAEL011510	multiple inositol polyphosphate phosphatase 1	multiple inositol polyphosphate phosphatase 1		2	NC_035108.1	95973554	95975536	plus	6
LOC5577483	1848.72	-0.84255	0.115532	-7.29281	3.04e-13	1.4e-11	LOC5577483	AaeL_AAEL013236, AAEL013236	proteasome subunit beta type-5	proteasome subunit beta type-5		3	NC_035109.1	280060462	280062158	plus	3
LOC5575995	87750.6	-1.0677	0.14641	-7.29257	3.04e-13	1.4e-11	LOC5575995	AaeL_AAEL002761, AAEL002761	tropomyosin-2	actin cytoskeleton-regulatory complex protein pan1|golgin-84|tropomyosin|tropomyosin-1, isoforms 9A/A/B|tropomyosin-2|uncharacterized protein LOC5575995		3	NC_035109.1	144994356	145116680	plus	22
LOC5576619	786.773	1.56479	0.214739	7.28693	3.17e-13	1.46e-11	LOC5576619	AaeL_AAEL012646, AAEL012646	uncharacterized LOC5576619	uncharacterized protein LOC5576619		3	NC_035109.1	283996275	283997369	plus	3
LOC5567534	162.854	-1.74661	0.23975	-7.28511	3.21e-13	1.47e-11	LOC5567534	AaeL_AAEL006122, AAEL006122	uncharacterized LOC5567534	uncharacterized protein LOC5567534		3	NC_035109.1	68957231	69099814	minus	6
LOC5569731	4046.56	1.0504	0.144193	7.28464	3.23e-13	1.47e-11	LOC5569731	AaeL_AAEL007889, AAEL007889	spondin-1	spondin-1		3	NC_035109.1	381275415	381412243	plus	8
LOC5571390	619.357	1.46949	0.201811	7.28153	3.3e-13	1.5e-11	LOC5571390	AaeL_AAEL009038, AAEL009038	putative serine protease F56F10.1	putative serine protease F56F10.1		2	NC_035108.1	101731097	101746024	minus	2
LOC5567303	1740.82	-2.05484	0.282288	-7.27925	3.36e-13	1.52e-11	LOC5567303	AaeL_AAEL005969, AAEL005969	phospholipase B1, membrane-associated	phospholipase B1, membrane-associated		3	NC_035109.1	227937889	228001411	minus	7
LOC5578682	1695.26	1.09435	0.150347	7.27887	3.37e-13	1.52e-11	LOC5578682	AaeL_AAEL003611, AAEL003611	acyl-CoA Delta(11) desaturase	acyl-CoA Delta(11) desaturase		1	NC_035107.1	189426103	189469788	plus	6
LOC5571140	2728.46	0.793669	0.109234	7.26574	3.71e-13	1.67e-11	LOC5571140	AaeL_AAEL008854, AAEL008854	RING finger protein 10	RING finger protein 10		2	NC_035108.1	240656669	240691304	minus	6
LOC5569632	2644.79	0.842139	0.116027	7.25814	3.92e-13	1.76e-11	LOC5569632	AaeL_AAEL007777, AAEL007777	uncharacterized LOC5569632	uncharacterized protein LOC5569632|vacuolar H+-ATPase V0 sector accessory subunit S1		3	NC_035109.1	133472808	133474737	plus	3
LOC5569808	627.312	1.10948	0.152906	7.25597	3.99e-13	1.79e-11	LOC5569808	AaeL_AAEL001291, AAEL001291, AAEL001311	protein takeout	protein takeout		2	NC_035108.1	448056064	448071248	minus	4
LOC5565954	1257.92	-0.737443	0.101655	-7.2544	4.03e-13	1.8e-11	LOC5565954	AaeL_AAEL005084, AAEL005084	tubulin beta chain	tubulin beta chain		1	NC_035107.1	294735009	294767022	plus	6
LOC5566155	496.92	0.924899	0.127632	7.24662	4.27e-13	1.9e-11	LOC5566155	AaeL_AAEL005065, AAEL005065, AAEL005223	very-long-chain (3R)-3-hydroxyacyl-CoA dehydratase 2	very-long-chain (3R)-3-hydroxyacyl-CoA dehydratase 2|very-long-chain (3R)-3-hydroxyacyl-CoA dehydratase hpo-8		3	NC_035109.1	90561482	90566230	plus	6
LOC5575366	284.781	2.9208	0.403211	7.24385	4.36e-13	1.93e-11	LOC5575366	AaeL_AAEL011763, AAEL011763, PPO3, ProPO3	phenoloxidase 2	phenoloxidase 2|prophenol oxidase		2	NC_035108.1	168685452	168687931	plus	5
LOC5580039	913.555	1.19278	0.164893	7.23368	4.7e-13	2.08e-11	LOC5580039	AaeL_AAEL010242, AAEL010242, SGP1A2	uncharacterized LOC5580039	uncharacterized protein LOC5580039|putative 8.7 kDa secreted protein|putative secreted protein		2	NC_035108.1	402853703	402854184	minus	2
LOC5572525	611.251	1.47026	0.203412	7.22798	4.9e-13	2.16e-11	LOC5572525	AaeL_AAEL009844, AAEL009844	uncharacterized LOC5572525	uncharacterized protein LOC5572525		3	NC_035109.1	18635901	18636759	minus	2
LOC5567876	432.664	-1.53514	0.212415	-7.22706	4.94e-13	2.17e-11	LOC5567876	AaeL_AAEL006339, AAEL006339	ras association domain-containing protein 10	ras association domain-containing protein 10		3	NC_035109.1	397308115	397451220	plus	5
LOC5579204	347.073	-1.23504	0.171118	-7.21747	5.3e-13	2.32e-11	LOC5579204	AaeL_AAEL014044, AAEL014044	protein Skeletor	protein Skeletor, isoforms B/C		1	NC_035107.1	220421559	220446577	plus	4
LOC5571725	1010.59	-1.7078	0.236637	-7.21694	5.32e-13	2.32e-11	LOC5571725	AaeL_AAEL009251, AAEL009251	salivary glue protein Sgs-3	salivary glue protein Sgs-3|uncharacterized protein LOC5571725		1	NC_035107.1	84127035	84277965	plus	8
LOC5571787	894.156	2.70346	0.375329	7.20291	5.89e-13	2.57e-11	LOC5571787	AaeL_AAEL009310, AAEL009310, AAEL009316	angiotensin-converting enzyme	angiotensin-converting enzyme		1	NW_018736081.1	5054	36203	minus	5
LOC5578149	6873.2	-0.828719	0.11534	-7.18504	6.72e-13	2.92e-11	LOC5578149	AaeL_AAEL013530, AAEL013530	cullin-1	cullin-1		2	NC_035108.1	246012706	246046420	minus	13
LOC5576596	1168.46	-1.04663	0.145833	-7.1769	7.13e-13	3.09e-11	LOC5576596	AaeL_AAEL002935, AAEL002935	sesquipedalian-1	sesquipedalian-1		1	NC_035107.1	85887931	85917647	minus	5
LOC5574096	2971.15	1.51058	0.210512	7.17574	7.19e-13	3.1e-11	LOC5574096	AaeL_AAEL002269, AAEL002269	purine nucleoside phosphorylase	purine nucleoside phosphorylase		2	NC_035108.1	31111924	31159315	minus	4
LOC5570105	9659.69	-0.818299	0.114082	-7.17288	7.34e-13	3.16e-11	LOC5570105	AaeL_AAEL008078, AAEL008078	serine/threonine-protein kinase Doa	serine/threonine-protein kinase Doa|uncharacterized protein LOC5570105		1	NC_035107.1	61967308	62336660	minus	26
LOC5574111	370.503	1.57014	0.218927	7.17199	7.39e-13	3.17e-11	LOC5574111	AaeL_AAEL002276, AAEL002276	coagulation factor XI	coagulation factor XI		2	NC_035108.1	29893391	29895381	plus	2
LOC5566140	307.087	-1.09389	0.152709	-7.16325	7.88e-13	3.37e-11	LOC5566140	AaeL_AAEL005171, AAEL005171	protein NDUFAF4 homolog	protein NDUFAF4 homolog		2	NC_035108.1	226382	229010	plus	3
LOC5569810	2570.64	2.14636	0.299929	7.15623	8.29e-13	3.54e-11	LOC5569810	AaeL_AAEL001306, AAEL001306	uncharacterized LOC5569810	uncharacterized protein LOC5569810		2	NC_035108.1	448016444	448038534	minus	5
LOC5571107	1383.03	0.813486	0.113783	7.14942	8.71e-13	3.71e-11	LOC5571107	AaeL_AAEL001526, AAEL001526	zinc finger protein 665	zinc finger protein 189|zinc finger protein 665		3	NC_035109.1	261134014	261219846	plus	16
LOC110680888	4756.38	0.845981	0.11834	7.14876	8.76e-13	3.71e-11	LOC110680888		uncharacterized LOC110680888	uncharacterized protein LOC110680888		Un	NW_018735450.1	32242	33615	plus	2
LOC5570135	4317.04	1.68187	0.235295	7.14793	8.81e-13	3.72e-11	LOC5570135	AaeL_AAEL008106, AAEL008106	keratin, type I cytoskeletal 9	keratin, type I cytoskeletal 9		3	NC_035109.1	14729680	14730939	plus	2
LOC110679554	1282.85	1.11106	0.155527	7.14385	9.08e-13	3.83e-11	LOC110679554	AaeL_AAEL007010, AAEL007010, CYP6AG4	probable cytochrome P450 28a5	probable cytochrome P450 28a5		3	NC_035109.1	171317141	171325292	minus	4
LOC5570376	38.0997	5.74126	0.803939	7.14142	9.24e-13	3.87e-11	LOC5570376	AaeL_AAEL008280, AAEL008280	formin-G	formin-G		3	NC_035109.1	250530052	250531673	plus	1
LOC5569945	4359.22	-0.684185	0.0958069	-7.14129	9.25e-13	3.87e-11	LOC5569945	AaeL_AAEL008041, AAEL008041	bleomycin hydrolase	bleomycin hydrolase		3	NC_035109.1	132076670	132100521	plus	7
LOC5574738	967.913	-1.85872	0.260351	-7.1393	9.38e-13	3.92e-11	LOC5574738	AaeL_AAEL011375, AAEL011375	transmembrane protease serine 9	transmembrane protease serine 9		2	NC_035108.1	266223135	266226443	plus	5
LOC110679177	898.638	-0.841469	0.117897	-7.1373	9.52e-13	3.97e-11	LOC110679177	AAEL017147	cytochrome c oxidase assembly factor 7 homolog	cytochrome c oxidase assembly factor 7 homolog		3	NC_035109.1	288880059	288881431	plus	2
LOC5567207	5942.53	0.936069	0.131259	7.13149	9.93e-13	4.12e-11	LOC5567207	AaeL_AAEL000902, AAEL000902	organic cation transporter protein	organic cation transporter protein		3	NC_035109.1	334447652	334501573	plus	4
LOC5579458	1285.33	0.937751	0.131567	7.12758	1.02e-12	4.23e-11	LOC5579458	AaeL_AAEL015404, AAEL015404, LYSC7B	lysozyme c-1	lysozyme c-1		2	NC_035108.1	35558218	35570341	minus	3
LOC5574294	336.977	-2.66346	0.374087	-7.11989	1.08e-12	4.46e-11	LOC5574294	AaeL_AAEL011068, AAEL011068	cuticle protein 67	cuticle protein 67		3	NC_035109.1	294480222	294482635	plus	2
LOC5571755	3800.32	-1.10924	0.155908	-7.11474	1.12e-12	4.62e-11	LOC5571755	AaeL_AAEL009278, AAEL009278	mitochondrial pyruvate carrier 2	mitochondrial pyruvate carrier 2		3	NC_035109.1	200293528	200299031	minus	3
LOC5579989	508.092	-1.92979	0.271294	-7.11329	1.13e-12	4.65e-11	LOC5579989	AaeL_AAEL001745, AAEL001745	decaprenyl-diphosphate synthase subunit 2	decaprenyl-diphosphate synthase subunit 2		2	NC_035108.1	37872708	37888083	plus	4
LOC5576174	898.387	-1.63679	0.230457	-7.10238	1.23e-12	5.02e-11	LOC5576174	AaeL_AAEL012370, AAEL012370	probable chitinase 2	probable chitinase 2		2	NC_035108.1	111774783	111810655	minus	7
LOC5568603	304.249	1.1762	0.16577	7.09536	1.29e-12	5.27e-11	LOC5568603	AaeL_AAEL001133, AAEL001133	beclin 1-associated autophagy-related key regulator	beclin 1-associated autophagy-related key regulator		3	NC_035109.1	406554729	406563889	plus	3
LOC5578955	5783.81	1.16479	0.164351	7.0872	1.37e-12	5.57e-11	LOC5578955	AaeL_AAEL013936, AAEL013936, SRPN4	serine protease inhibitor 28Dc	serine protease inhibitor 28Dc		2	NC_035108.1	305830219	305919833	plus	9
LOC5564156	196.393	1.61453	0.22795	7.08283	1.41e-12	5.73e-11	LOC5564156	AaeL_AAEL004127, AAEL004127	short-chain specific acyl-CoA dehydrogenase, mitochondrial	short-chain specific acyl-CoA dehydrogenase, mitochondrial		3	NC_035109.1	153957951	153960484	minus	2
LOC5578326	848.876	1.63287	0.231136	7.06454	1.61e-12	6.52e-11	LOC5578326	AaeL_AAEL013648, AAEL013648	fatty acyl-CoA reductase wat	fatty acyl-CoA reductase wat		2	NC_035108.1	217720190	217786457	plus	12
LOC110678545	36.2088	-8.73379	1.23696	-7.06068	1.66e-12	6.69e-11	LOC110678545		uncharacterized LOC110678545			3	NC_035109.1	357724622	357725798	minus	2
LOC5578580	12715.3	-1.72818	0.244948	-7.05531	1.72e-12	6.93e-11	LOC5578580	AaeL_AAEL013766, AAEL013766	protein obstructor-E	protein obstructor-E		1	NC_035107.1	162616995	162692189	minus	6
LOC110676231	3440.39	-1.38879	0.196862	-7.05462	1.73e-12	6.95e-11	LOC110676231		paternally-expressed gene 3 protein	paternally-expressed gene 3 protein		2	NC_035108.1	178905912	178922114	plus	3
LOC5579933	439.308	1.66763	0.236424	7.05354	1.74e-12	6.98e-11	LOC5579933	AaeL_AAEL006810, AAEL006810, CYP9J19	probable cytochrome P450 9f2	probable cytochrome P450 9f2|cytochrome P450 9J19		3	NC_035109.1	368517401	368519262	plus	2
LOC5567209	318.128	-1.24691	0.177071	-7.04183	1.9e-12	7.57e-11	LOC5567209	AaeL_AAEL000897, AAEL000897	tetratricopeptide repeat protein 36 homolog	tetratricopeptide repeat protein 36 homolog		3	NC_035109.1	334422480	334423895	minus	3
LOC5563617	768.671	1.98321	0.281765	7.03852	1.94e-12	7.74e-11	LOC5563617	AaeL_AAEL000059, AAEL000059, AAEL015430, CLIPB19	serine protease easter	serine protease easter		3	NC_035109.1	105080243	105083508	plus	5
LOC5570298	830.188	-1.28149	0.182161	-7.03492	1.99e-12	7.92e-11	LOC5570298	AaeL_AAEL008222, AAEL008222	pancreatic lipase-related protein 2	pancreatic lipase-related protein 2		3	NC_035109.1	87729916	87731358	plus	3
LOC5565692	118.727	-2.24445	0.319731	-7.01982	2.22e-12	8.8e-11	LOC5565692	AaeL_AAEL004921, AAEL004921	endocuticle structural glycoprotein SgAbd-2	endocuticle structural glycoprotein SgAbd-2		2	NC_035108.1	259632250	259632795	minus	1
LOC5568519	1038.43	-1.46368	0.208577	-7.01745	2.26e-12	8.92e-11	LOC5568519	AaeL_AAEL006933, AAEL006927, AAEL006933	AF4/FMR2 family member 4	AF4/FMR2 family member 4		3	NC_035109.1	361436236	361928348	minus	9
LOC5564658	2701.66	-1.16353	0.165842	-7.01589	2.28e-12	9e-11	LOC5564658	AaeL_AAEL004382, AAEL004382	uncharacterized LOC5564658	uncharacterized protein LOC5564658|putative 41 kDa salivary secreted protein		3	NC_035109.1	94389677	94391437	minus	3
LOC5565800	2478.66	-0.937118	0.133628	-7.01291	2.33e-12	9.17e-11	LOC5565800	AaeL_AAEL005003, AAEL005003	CBL-interacting protein kinase 18	CBL-interacting protein kinase 18		3	NC_035109.1	325184916	325253098	plus	7
LOC110679215	242.623	-1.82531	0.260376	-7.0103	2.38e-12	9.31e-11	LOC110679215		uncharacterized LOC110679215	uncharacterized protein LOC110679215		3	NC_035109.1	73720391	73722463	plus	2
LOC5574907	1205.62	-1.49077	0.212894	-7.00239	2.52e-12	9.83e-11	LOC5574907	AaeL_AAEL013807, AAEL013807	nose resistant to fluoxetine protein 6	nose resistant to fluoxetine protein 6		2	NC_035108.1	96105283	96132137	plus	13
LOC5570515	390.249	1.20215	0.171788	6.99788	2.6e-12	1.01e-10	LOC5570515	AaeL_AAEL001423, AAEL001423	venom acid phosphatase Acph-1	venom acid phosphatase Acph-1		2	NC_035108.1	45601275	45629282	plus	6
LOC5568251	3049.11	1.37735	0.196829	6.99772	2.6e-12	1.01e-10	LOC5568251	AaeL_AAEL006674, AAEL006674, CLIPB29	melanization protease 1	melanization protease 1|prophenoloxidase activator		2	NC_035108.1	325041861	325043294	minus	3
LOC5569000	965.807	1.8816	0.269152	6.99084	2.73e-12	1.06e-10	LOC5569000	AaeL_AAEL007283, AAEL007283	acyl-CoA synthetase short-chain family member 3, mitochondrial	acyl-CoA synthetase short-chain family member 3, mitochondrial		3	NC_035109.1	196397648	196440072	plus	12
LOC5570211	1027.51	1.48855	0.212988	6.98888	2.77e-12	1.07e-10	LOC5570211		aminopeptidase N	aminopeptidase N		3	NC_035109.1	9122551	9136412	plus	3
LOC5571228	444.916	1.23642	0.177148	6.97955	2.96e-12	1.14e-10	LOC5571228	AaeL_AAEL013373, AAEL008931, AAEL013373	G protein-activated inward rectifier potassium channel 3	G protein-activated inward rectifier potassium channel 3|Kir2B channel protein		3	NC_035109.1	50248667	50262977	plus	3
LOC5564545	1162.51	-0.923509	0.132529	-6.96837	3.21e-12	1.23e-10	LOC5564545	AaeL_AAEL004308, AAEL004308	proteasome subunit alpha type-5	proteasome subunit alpha type-5|20S proteasome regulatory subunit alpha type PSMA5/PUP2		2	NC_035108.1	386663857	386665213	plus	4
LOC110680287	49.2535	3.33637	0.47881	6.96804	3.21e-12	1.23e-10	LOC110680287		vitellogenin-like	LOW QUALITY PROTEIN: vitellogenin-like		Un	NW_018734587.1	149854	151382	minus	5
LOC5567139	296.545	1.4268	0.204853	6.96501	3.28e-12	1.25e-10	LOC5567139	AaeL_AAEL005890, AAEL005890	heat shock protein 67B2	heat shock protein 67B2		2	NC_035108.1	66154037	66155834	plus	4
LOC5570982	923.946	2.52685	0.3628	6.96486	3.29e-12	1.25e-10	LOC5570982	AaeL_AAEL008701, AAEL008701	inositol oxygenase	inositol oxygenase		3	NC_035109.1	95803278	95810775	minus	5
LOC5566438	1124.08	1.03053	0.147999	6.96307	3.33e-12	1.27e-10	LOC5566438	AaeL_AAEL005385, AAEL005385, AAEL005397	uncharacterized LOC5566438	uncharacterized protein LOC5566438		2	NC_035108.1	258662725	258802323	plus	13
LOC5570483	1065.68	1.45245	0.208727	6.95865	3.44e-12	1.3e-10	LOC5570483	AaeL_AAEL001402, AAEL001402	acidic leucine-rich nuclear phosphoprotein 32 family member A	acidic leucine-rich nuclear phosphoprotein 32 family member A		2	NC_035108.1	48290579	48292091	minus	2
LOC5578026	136.756	2.98195	0.429172	6.94813	3.7e-12	1.4e-10	LOC5578026	AaeL_AAEL003380, AAEL003380, CYP4H28, CYP4H28v2, CYP4H28v3, CYP4H44P	cytochrome P450 4c3	cytochrome P450 4c3		3	NC_035109.1	79340315	79353492	minus	3
LOC5576617	3194.62	1.29971	0.187234	6.94164	3.88e-12	1.46e-10	LOC5576617	AaeL_AAEL012644, AAEL012644	uncharacterized LOC5576617	uncharacterized protein LOC5576617		3	NC_035109.1	284020239	284021259	plus	2
LOC5571541	216.776	1.89897	0.273867	6.9339	4.09e-12	1.54e-10	LOC5571541	AaeL_AAEL009123, AAEL009123, CYP6Z6	cytochrome P450 6d3	cytochrome P450 6d3		2	NC_035108.1	418888478	418890194	minus	2
LOC5570533	2614.03	-0.776877	0.112108	-6.9297	4.22e-12	1.58e-10	LOC5570533	AaeL_AAEL001406, AAEL001406	uncharacterized LOC5570533	uncharacterized protein LOC5570533		2	NC_035108.1	46241595	46269419	minus	10
LOC5564633	5011.15	-0.975461	0.140844	-6.92583	4.33e-12	1.62e-10	LOC5564633	AaeL_AAEL004369, AAEL004369	uncharacterized family 31 glucosidase KIAA1161	uncharacterized family 31 glucosidase KIAA1161		3	NC_035109.1	94167884	94170337	minus	2
LOC110679014	871.538	-1.3165	0.190121	-6.92454	4.37e-12	1.63e-10	LOC110679014		F-box/LRR-repeat protein 13-like	F-box/LRR-repeat protein 13-like		3	NC_035109.1	350898569	350912778	minus	6
LOC5568702	351.791	-1.54821	0.223638	-6.92283	4.43e-12	1.65e-10	LOC5568702	AaeL_AAEL007055, AAEL007055	lipase member H	lipase member H		3	NC_035109.1	298853932	298855114	plus	2
LOC5574756	718.563	1.88535	0.272425	6.92063	4.5e-12	1.67e-10	LOC5574756		uncharacterized LOC5574756			1	NC_035107.1	75753342	75754258	minus	2
LOC5567338	7063.95	-0.725539	0.104944	-6.9136	4.73e-12	1.75e-10	LOC5567338	AAEL006000	cytochrome c oxidase subunit 7A1, mitochondrial	cytochrome c oxidase subunit 7A1, mitochondrial		2	NC_035108.1	472337199	472338232	minus	3
LOC5570169	3409.21	0.822143	0.119046	6.9061	4.98e-12	1.84e-10	LOC5570169	AaeL_AAEL008141, AAEL008141	period circadian protein	period circadian protein		3	NC_035109.1	79001477	79033702	minus	7
LOC5573368	3469.09	-1.15082	0.166651	-6.90553	5e-12	1.84e-10	LOC5573368	AaeL_AAEL010448, AAEL010448	uncharacterized LOC5573368	uncharacterized protein LOC5573368		3	NC_035109.1	314253218	314281133	plus	2
LOC110680197	314.423	-1.75689	0.254716	-6.89745	5.29e-12	1.95e-10	LOC110680197		larval cuticle protein A3A-like	larval cuticle protein A3A-like		Un	NW_018734418.1	15998	18046	minus	3
LOC5576094	538.223	-1.76785	0.25648	-6.89274	5.47e-12	2.01e-10	LOC5576094	AaeL_AAEL002780, AAEL002780	peritrophin-1	peritrophin-1		3	NC_035109.1	129448530	129631424	plus	6
LOC5570879	634.264	-0.972412	0.141208	-6.88637	5.72e-12	2.09e-10	LOC5570879	AaeL_AAEL008651, AAEL008651	uncharacterized LOC5570879	uncharacterized protein LOC5570879		3	NC_035109.1	172551641	172553511	minus	2
LOC5572541	511.003	1.65825	0.241222	6.87438	6.23e-12	2.27e-10	LOC5572541	AaeL_AAEL009875, AAEL009875	alanine aminotransferase 1	alanine aminotransferase 1		1	NC_035107.1	92289545	92313119	plus	4
LOC5565210	2383.5	-1.38832	0.201999	-6.87289	6.29e-12	2.29e-10	LOC5565210	AaeL_AAEL004680, AAEL004680	centrosomal protein of 83 kDa	BICD family-like cargo adapter 2|CAP-Gly domain-containing linker protein 1|centrosomal protein of 83 kDa		3	NC_035109.1	248659386	248676095	plus	3
LOC5565445	534.103	1.30097	0.189517	6.86466	6.66e-12	2.42e-10	LOC5565445	AaeL_AAEL000670, AAEL000670	peptide methionine sulfoxide reductase	peptide methionine sulfoxide reductase		3	NC_035109.1	395104752	395106241	minus	4
LOC5574677	4219.63	1.71102	0.249331	6.86244	6.77e-12	2.45e-10	LOC5574677	AaeL_AAEL011319, AAEL011319	uncharacterized LOC5574677	uncharacterized protein LOC5574677		2	NC_035108.1	331420083	331470253	minus	5
LOC5570114	2913.74	1.54788	0.225602	6.86109	6.83e-12	2.47e-10	LOC5570114	AaeL_AAEL013629, AAEL013629	trypsin alpha-3	trypsin alpha-3		1	NC_035107.1	61730322	61731744	minus	1
LOC5567839	17822	-0.729579	0.106517	-6.84941	7.42e-12	2.67e-10	LOC5567839	AaeL_AAEL001005, AAEL001005	calreticulin	calreticulin|putative calreticulin		1	NC_035107.1	210061034	210069131	plus	3
LOC110678423	5829.36	-0.962367	0.140613	-6.84407	7.7e-12	2.77e-10	LOC110678423		uncharacterized family 31 glucosidase KIAA1161-like	uncharacterized family 31 glucosidase KIAA1161-like		3	NC_035109.1	94164224	94166678	minus	2
LOC5578507	36.5931	4.47634	0.654181	6.84266	7.77e-12	2.79e-10	LOC5578507	AaeL_AAEL013715, AAEL013715	trypsin 5G1-like	trypsin 5G1-like		3	NC_035109.1	307780893	307781820	plus	1
LOC5572020	938.35	1.05056	0.153557	6.8415	7.84e-12	2.8e-10	LOC5572020	AaeL_AAEL000229, AAEL000229	prosialokinin	prosialokinin|TKSIA_AEDAE|salivary vasodilatory protein|sialokinin I preproprotein		1	NC_035107.1	7128424	7129713	plus	3
LOC5575359	191.238	3.0937	0.452202	6.84141	7.84e-12	2.8e-10	LOC5575359	AaeL_AAEL011764, AAEL011764, PPO10	phenoloxidase 2	phenoloxidase 2		2	NC_035108.1	168663111	168671796	plus	4
LOC5566500	870.596	2.55663	0.374086	6.83435	8.24e-12	2.93e-10	LOC5566500		uncharacterized LOC5566500			1	NC_035107.1	79997602	79998878	minus	2
LOC5573025	52.5265	5.57863	0.816535	6.83208	8.37e-12	2.97e-10	LOC5573025	AaeL_AAEL013714, AAEL013714	trypsin 5G1-like	trypsin 5G1-like|serine protease VI		3	NC_035109.1	307804366	307805304	plus	1
LOC5579326	2707.56	-0.855273	0.125508	-6.81451	9.46e-12	3.35e-10	LOC5579326	AaeL_AAEL015575, AAEL015575	mitochondrial import inner membrane translocase subunit Tim17-A	mitochondrial import inner membrane translocase subunit Tim17-A		1	NC_035107.1	194164924	194180080	plus	4
LOC5574277	51.1691	-2.70999	0.397855	-6.8115	9.66e-12	3.41e-10	LOC5574277	AaeL_AAEL011042, AAEL011042	trichohyalin	trichohyalin		2	NC_035108.1	177672431	177673595	plus	2
LOC5570819	13511	1.20661	0.17727	6.80664	9.99e-12	3.52e-10	LOC5570819	AaeL_AAEL008607, AAEL008607	CD109 antigen	CD109 antigen		2	NC_035108.1	363057726	363135466	plus	24
LOC5575766	43.0941	-2.38724	0.351177	-6.79784	1.06e-11	3.73e-10	LOC5575766	AaeL_AAEL002725, AAEL002725	cuticle protein CP14.6	cuticle protein CP14.6		2	NC_035108.1	14463427	14463999	plus	2
LOC5567889	788.937	-0.783309	0.115272	-6.79533	1.08e-11	3.79e-10	LOC5567889	AaeL_AAEL006346, AAEL006346	BAG family molecular chaperone regulator 2	BAG family molecular chaperone regulator 2		3	NC_035109.1	396774697	396795588	plus	6
LOC5578131	14657.2	-1.7942	0.264266	-6.7894	1.13e-11	3.94e-10	LOC5578131	AaeL_AAEL013515, AAEL013515	flexible cuticle protein 12	flexible cuticle protein 12		2	NC_035108.1	37553275	37553889	minus	2
LOC5570480	4954.63	1.49787	0.220679	6.78757	1.14e-11	3.98e-10	LOC5570480	AaeL_AAEL001420, AAEL001420	uncharacterized LOC5570480	uncharacterized protein LOC5570480|membrane glycoprotein LIG-1		2	NC_035108.1	48269336	48271052	plus	2
LOC5571706	4193.54	-0.694611	0.102408	-6.78276	1.18e-11	4.1e-10	LOC5571706	AaeL_AAEL009232, AAEL009232	long-chain-fatty-acid--CoA ligase 6	long-chain-fatty-acid--CoA ligase 1|long-chain-fatty-acid--CoA ligase 6		3	NC_035109.1	356692990	356803909	plus	15
LOC5578882	4595.99	1.38892	0.204902	6.77844	1.21e-11	4.22e-10	LOC5578882	AaeL_AAEL009985, AAEL009985	uncharacterized LOC5578882	uncharacterized protein LOC5578882		3	NC_035109.1	303464022	303464715	plus	2
LOC5580119	1507.55	1.09798	0.162	6.77767	1.22e-11	4.23e-10	LOC5580119		uncharacterized LOC5580119	uncharacterized protein LOC5580119		1	NC_035107.1	98790564	98851840	plus	9
LOC5568890	2400.16	-1.17407	0.173309	-6.77443	1.25e-11	4.32e-10	LOC5568890		proton-coupled amino acid transporter-like protein pathetic	proton-coupled amino acid transporter-like protein pathetic		2	NC_035108.1	318020704	318151404	minus	6
LOC5564160	495.499	-0.87863	0.129727	-6.77293	1.26e-11	4.35e-10	LOC5564160	AaeL_AAEL004143, AAEL004143	N-acetylglucosaminyl-phosphatidylinositol de-N-acetylase	N-acetylglucosaminyl-phosphatidylinositol de-N-acetylase		3	NC_035109.1	153850492	153862879	plus	4
LOC5570229	5659.04	1.73107	0.255642	6.77148	1.27e-11	4.38e-10	LOC5570229	AaeL_AAEL008160, AAEL008160	fatty acid synthase	fatty acid synthase		3	NC_035109.1	9993811	10002427	minus	5
LOC5568450	1509.98	-1.29098	0.19066	-6.7711	1.28e-11	4.38e-10	LOC5568450	AaeL_AAEL006863, AAEL006863	uncharacterized LOC5568450	uncharacterized protein LOC5568450		3	NC_035109.1	369747843	369777832	plus	3
LOC5564822	196.729	-1.33794	0.197919	-6.76007	1.38e-11	4.72e-10	LOC5564822	AaeL_AAEL000609, AAEL000609	uncharacterized LOC5564822	uncharacterized protein LOC5564822		1	NC_035107.1	84505711	84515233	plus	5
LOC110676548	557.886	1.14688	0.169681	6.75903	1.39e-11	4.74e-10	LOC110676548		uncharacterized LOC110676548			2	NC_035108.1	256521918	256559899	plus	2
LOC110674745	4071.17	-1.84342	0.272905	-6.75481	1.43e-11	4.87e-10	LOC110674745		pollen-specific leucine-rich repeat extensin-like protein 3	pollen-specific leucine-rich repeat extensin-like protein 3		1	NC_035107.1	13145939	13159171	minus	8
LOC5575720	388.136	-1.18631	0.176072	-6.73762	1.61e-11	5.47e-10	LOC5575720	AaeL_AAEL012031, AAEL012031	centrosomal protein of 152 kDa	centrosomal protein of 152 kDa		3	NC_035109.1	147157238	147189006	plus	5
LOC5564979	728.269	0.849413	0.126183	6.73162	1.68e-11	5.69e-10	LOC5564979	AaeL_AAEL004513, AAEL004513	glycine receptor subunit alpha-2	glycine receptor subunit alpha-2		2	NC_035108.1	310266241	310318940	plus	7
LOC110677733	340.45	-1.70307	0.253125	-6.72817	1.72e-11	5.81e-10	LOC110677733		larval cuticle protein A3A-like	larval cuticle protein A3A-like		3	NC_035109.1	177560384	177562510	minus	3
LOC5569606	905.08	1.21024	0.180008	6.72325	1.78e-11	6e-10	LOC5569606	AaeL_AAEL001261, AAEL001261	uncharacterized LOC5569606	uncharacterized protein LOC5569606		2	NC_035108.1	152982984	152984302	plus	3
LOC5575993	118933	-1.14861	0.170979	-6.71785	1.84e-11	6.2e-10	LOC5575993	AaeL_AAEL002759, AAEL002759	tropomyosin-1	tropomyosin-1		3	NC_035109.1	145170571	145196908	plus	7
LOC5573452	1264.02	-0.782028	0.116413	-6.71772	1.85e-11	6.2e-10	LOC5573452	AaeL_AAEL010496, AAEL010496	ubiquitin carboxyl-terminal hydrolase 14	ubiquitin carboxyl-terminal hydrolase 14		2	NC_035108.1	446422111	446466213	plus	8
LOC5564727	108.436	1.63703	0.244172	6.70442	2.02e-11	6.77e-10	LOC5564727	AaeL_AAEL004402, AAEL004402	alpha-L-iduronidase	alpha-L-iduronidase		3	NC_035109.1	271296291	271325046	plus	7
LOC5574237	1949.18	-0.967766	0.14441	-6.70153	2.06e-11	6.89e-10	LOC5574237	AaeL_AAEL011006, AAEL011006	guanylate kinase	guanylate kinase		3	NC_035109.1	287782498	287810245	minus	8
LOC5565869	1235.45	-0.749718	0.111916	-6.69896	2.1e-11	6.99e-10	LOC5565869	AaeL_AAEL015007, AAEL015007	proteasome subunit alpha type-1	proteasome subunit alpha type-1		2	NC_035108.1	337725051	337726719	minus	3
LOC5572552	870.664	-0.916197	0.136768	-6.69889	2.1e-11	6.99e-10	LOC5572552	AaeL_AAEL009883, AAEL009883	ATPase family AAA domain-containing protein 3A homolog	ATPase family AAA domain-containing protein 3A homolog		3	NC_035109.1	121945079	121954641	plus	4
LOC5579999	548.563	1.8706	0.279518	6.69224	2.2e-11	7.3e-10	LOC5579999	AaeL_AAEL001737, AAEL001737	fatty acyl-CoA reductase wat	fatty acyl-CoA reductase wat		2	NC_035108.1	39875159	39877040	minus	3
LOC5568516	2367.59	-0.759449	0.113539	-6.68891	2.25e-11	7.45e-10	LOC5568516	AaeL_AAEL006929, AAEL006929	cullin-2	cullin-2		3	NC_035109.1	195515983	195527656	minus	12
LOC5572368	243.95	1.25967	0.188346	6.68807	2.26e-11	7.47e-10	LOC5572368	AaeL_AAEL009750, AAEL009750	uncharacterized LOC5572368	uncharacterized protein LOC5572368		3	NC_035109.1	284223909	284225149	minus	3
LOC5572925	14604.5	-0.609499	0.0911583	-6.68617	2.29e-11	7.54e-10	LOC5572925	AaeL_AAEL010143, AAEL010143	isocitrate dehydrogenase [NAD] subunit beta, mitochondrial	isocitrate dehydrogenase [NAD] subunit beta, mitochondrial		2	NC_035108.1	264791206	264802701	minus	5
LOC5576017	703.842	2.67945	0.400747	6.68613	2.29e-11	7.54e-10	LOC5576017	AaeL_AAEL012255, AAEL012255	uncharacterized LOC5576017	uncharacterized protein LOC5576017		3	NC_035109.1	52963384	52964816	plus	2
LOC5575262	184.629	-1.33076	0.199081	-6.68452	2.32e-11	7.6e-10	LOC5575262	AaeL_AAEL011727, AAEL011727, mal2	molybdenum cofactor sulfurase 2	molybdenum cofactor sulfurase 2|MCS 2|MOCO2_AEDAE|MOS 2|Ma-l 2|MoCo sulfurase 2|Molybdenum cofactor sulfurtransferase 2|Protein maroon-like 2		1	NC_035107.1	23764995	23774746	plus	3
LOC110681275	337.344	-1.70407	0.255034	-6.68172	2.36e-11	7.73e-10	LOC110681275		larval cuticle protein A3A-like	larval cuticle protein A3A-like		Un	NW_018736332.1	43153	45202	plus	3
LOC5569949	2297.21	-1.299	0.194951	-6.66321	2.68e-11	8.75e-10	LOC5569949	AaeL_AAEL008034, AAEL008034, AAEL008815	fatty acyl-CoA reductase 1	fatty acyl-CoA reductase 1		3	NC_035109.1	132121152	132172115	minus	7
LOC5577988	3053.21	-0.982924	0.147658	-6.65676	2.8e-11	9.11e-10	LOC5577988	AaeL_AAEL003370, AAEL003370, AAEL003400	serine/threonine-protein kinase minibrain	serine/threonine-protein kinase minibrain		3	NC_035109.1	81558320	81790436	minus	13
LOC5564769	974.686	-0.882977	0.132646	-6.65666	2.8e-11	9.11e-10	LOC5564769	AaeL_AAEL004438, AAEL004438	grpE protein homolog, mitochondrial	grpE protein homolog, mitochondrial		3	NC_035109.1	205182473	205194201	plus	5
LOC23687740	336.131	-1.52218	0.228817	-6.65238	2.88e-11	9.36e-10	LOC23687740	AaeL_AAEL017320, AAEL017320, FOHSDR-2	farnesol dehydrogenase-like	farnesol dehydrogenase-like|NADP+-dependent farnesol dehydrogenase 2		3	NC_035109.1	347295325	347296290	plus	2
LOC5567680	113696	0.695855	0.104688	6.64694	2.99e-11	9.69e-10	LOC5567680	AaeL_AAEL006259, AAEL006259, GPROP2	opsin-1	opsin-1		3	NC_035109.1	63253679	63255160	plus	2
LOC5565478	2837.14	-1.05657	0.158963	-6.64662	3e-11	9.69e-10	LOC5565478	AaeL_AAEL014854, AAEL014854	uncharacterized LOC5565478	uncharacterized protein LOC5565478		1	NC_035107.1	18921560	19079417	minus	17
LOC5574023	94.4279	2.44501	0.367989	6.64424	3.05e-11	9.82e-10	LOC5574023	AaeL_AAEL010868, AAEL010868	facilitated trehalose transporter Tret1	facilitated trehalose transporter Tret1		2	NC_035108.1	383869224	383880483	minus	5
LOC110674237	3042.98	1.66026	0.25022	6.63521	3.24e-11	1.04e-09	LOC110674237		uncharacterized LOC110674237	uncharacterized protein LOC110674237		1	NC_035107.1	306539616	306540168	plus	1
LOC5577360	8792.73	-1.22221	0.184254	-6.6333	3.28e-11	1.05e-09	LOC5577360	AaeL_AAEL000445, AAEL000445	uncharacterized LOC5577360	uncharacterized protein LOC5577360		3	NC_035109.1	185753614	185781840	minus	4
LOC5567100	1457.79	-0.820306	0.123762	-6.62807	3.4e-11	1.09e-09	LOC5567100	AaeL_AAEL005830, AAEL005830	proteasome subunit alpha type-7-1	proteasome subunit alpha type-7-1		1	NC_035107.1	116432061	116433147	minus	2
LOC5568148	437.387	-1.33836	0.202053	-6.62381	3.5e-11	1.12e-09	LOC5568148	AaeL_AAEL006571, AAEL006571, PELLE	serine/threonine-protein kinase pelle	serine/threonine-protein kinase pelle|putative serine/threonine protein kinase		3	NC_035109.1	44774525	44807360	plus	6
LOC23687783	3114.85	0.749974	0.113251	6.62222	3.54e-11	1.13e-09	LOC23687783	AaeL_AAEL017363, AAEL017363	DNA-directed RNA polymerase II subunit RPB1	DNA-directed RNA polymerase II subunit RPB1		2	NC_035108.1	300344873	300372057	minus	6
LOC5572171	661.425	-1.69596	0.256198	-6.61972	3.6e-11	1.14e-09	LOC5572171	AaeL_AAEL005917, AAEL005917	protein obstructor-E	protein obstructor-E		1	NC_035107.1	147187735	147189357	plus	5
LOC5570741	2712.47	-1.02347	0.154928	-6.60608	3.95e-11	1.25e-09	LOC5570741	AaeL_AAEL012672, AAEL012672	ubiquitin-conjugating enzyme E2 W	ubiquitin-conjugating enzyme E2 W		2	NC_035108.1	98829778	99035629	minus	9
LOC5570536	2485.89	-1.52592	0.231081	-6.60342	4.02e-11	1.27e-09	LOC5570536	AaeL_AAEL001437, AAEL001437	uncharacterized LOC5570536	uncharacterized protein LOC5570536		2	NC_035108.1	47004237	47644489	plus	13
LOC5571597	2822.05	1.28345	0.194693	6.59217	4.33e-11	1.37e-09	LOC5571597		neurotrypsin	neurotrypsin		2	NC_035108.1	97390048	97434173	minus	5
LOC5578623	1317.93	1.12381	0.170584	6.58798	4.46e-11	1.41e-09	LOC5578623	AaeL_AAEL003581, AAEL003581	amidophosphoribosyltransferase	amidophosphoribosyltransferase		1	NC_035107.1	69218288	69237296	plus	6
LOC5572198	2108.66	0.745731	0.113256	6.5845	4.56e-11	1.43e-09	LOC5572198	AaeL_AAEL009615, AAEL009615, GPROP8	opsin, ultraviolet-sensitive	opsin, ultraviolet-sensitive|ultraviolet-sensitive opsin		2	NC_035108.1	169760185	169788904	plus	5
LOC5567922	62.7982	4.0043	0.608163	6.58425	4.57e-11	1.43e-09	LOC5567922	AaeL_AAEL006376, AAEL006376	trypsin	trypsin		1	NC_035107.1	101053170	101054242	minus	2
LOC5568060	14958.2	0.893334	0.135698	6.58325	4.6e-11	1.44e-09	LOC5568060	AaeL_AAEL006498, AAEL006498, GPROP1	opsin-1	opsin-1		3	NC_035109.1	15095953	15097396	minus	2
LOC5563591	2418.17	1.70404	0.259032	6.57849	4.75e-11	1.48e-09	LOC5563591	AaeL_AAEL000006, AAEL000006	phosphoenolpyruvate carboxykinase [GTP]	phosphoenolpyruvate carboxykinase [GTP]		3	NC_035109.1	102799321	102808822	plus	3
LOC5573904	851.073	-1.41789	0.215663	-6.57458	4.88e-11	1.52e-09	LOC5573904	AaeL_AAEL002181, AAEL002181	adult cuticle protein 1	adult cuticle protein 1		2	NC_035108.1	428843770	428848867	minus	3
LOC5579937	130.481	-1.46427	0.223237	-6.55927	5.41e-11	1.68e-09	LOC5579937	AaeL_AAEL006797, AAEL006797	F-box/LRR-repeat protein 7	F-box/LRR-repeat protein 7		3	NC_035109.1	169999243	170218661	plus	7
LOC110675370	298.432	-1.36434	0.208032	-6.55832	5.44e-11	1.69e-09	LOC110675370		polycystic kidney disease protein 1-like 3	polycystic kidney disease protein 1-like 3		2	NC_035108.1	20838031	20872418	plus	8
LOC5576402	188.355	-1.21946	0.186075	-6.55362	5.62e-11	1.74e-09	LOC5576402	AaeL_AAEL012496, AAEL012496	ankyrin repeat and BTB/POZ domain-containing protein 2	ankyrin repeat and BTB/POZ domain-containing protein 2|uncharacterized protein LOC5576402		3	NC_035109.1	241997654	242369017	plus	14
LOC5567614	1062.88	0.683013	0.104261	6.55099	5.72e-11	1.76e-09	LOC5567614	AaeL_AAEL006189, AAEL006189	acyl-CoA-binding domain-containing protein 5	acyl-CoA-binding domain-containing protein 5		1	NC_035107.1	224666994	224718094	plus	5
LOC5573138	7540.28	-0.873193	0.133292	-6.55098	5.72e-11	1.76e-09	LOC5573138	AaeL_AAEL001969, AAEL001969	ejaculatory bulb-specific protein 3	ejaculatory bulb-specific protein 3		2	NC_035108.1	425976948	425990985	minus	2
LOC5572245	1941.19	0.969186	0.148131	6.54274	6.04e-11	1.86e-09	LOC5572245		uncharacterized LOC5572245			2	NC_035108.1	203760238	203761128	minus	2
LOC5575792	4393.57	-0.956652	0.146256	-6.54093	6.11e-11	1.88e-09	LOC5575792	AaeL_AAEL012064, AAEL012064	ecdysteroid-regulated 16 kDa protein	ecdysteroid-regulated 16 kDa protein		1	NC_035107.1	270494437	270535896	minus	5
LOC110679648	115.769	3.2839	0.502179	6.53931	6.18e-11	1.89e-09	LOC110679648		uncharacterized LOC110679648			3	NC_035109.1	397672616	397673296	plus	2
LOC5568500	3738.23	-1.14019	0.17476	-6.52432	6.83e-11	2.09e-09	LOC5568500	AaeL_AAEL006910, AAEL006910	ubiquitin conjugation factor E4 B	ubiquitin conjugation factor E4 B		3	NC_035109.1	143712835	143746433	minus	4
LOC5572422	265.528	-1.6345	0.250564	-6.52331	6.88e-11	2.1e-09	LOC5572422	AaeL_AAEL001809, AAEL001809	protein limb expression 1 homolog	protein limb expression 1 homolog		2	NC_035108.1	374171724	374376249	plus	7
LOC5574161	61971.4	-0.823025	0.126251	-6.51897	7.08e-11	2.16e-09	LOC5574161	AaeL_AAEL010975, AAEL010975	paramyosin, long form	paramyosin, long form|paramyosin, short form		2	NC_035108.1	151123792	151192698	plus	11
LOC5566978	1005.53	-0.804776	0.1235	-6.51642	7.2e-11	2.19e-09	LOC5566978	AaeL_AAEL005730, AAEL005730	COP9 signalosome complex subunit 2	COP9 signalosome complex subunit 2		2	NC_035108.1	437262223	437270339	plus	5
LOC5580008	268.878	1.22674	0.188266	6.51597	7.22e-11	2.19e-09	LOC5580008	AaeL_AAEL009642, AAEL009642, CAT-B4	cathepsin B-like cysteine proteinase 3	cathepsin B-like cysteine proteinase 3|putative vitellogenic cathepsin B		1	NC_035107.1	222740836	222742705	plus	1
LOC5571245	1218.17	0.803215	0.123297	6.51445	7.3e-11	2.21e-09	LOC5571245	AaeL_AAEL001546, AAEL001539, AAEL001546	protein phosphatase 1 regulatory subunit 16A	protein phosphatase 1 regulatory subunit 16A		3	NC_035109.1	371543119	372031754	minus	16
LOC5571191	9105.51	-1.12021	0.172018	-6.51217	7.41e-11	2.24e-09	LOC5571191	AaeL_AAEL008882, AAEL008882	basic proline-rich protein	basic proline-rich protein		2	NC_035108.1	127140267	127176378	plus	5
LOC5577612	771.543	-0.949985	0.145992	-6.50709	7.66e-11	2.31e-09	LOC5577612	AaeL_AAEL003254, AAEL003254	putative ATPase N2B	putative ATPase N2B		2	NC_035108.1	366687792	366705383	plus	6
LOC5574268	204.855	-1.50608	0.231595	-6.50307	7.87e-11	2.37e-09	LOC5574268	AaeL_AAEL014925, AAEL014925	larval cuticle protein A2B	larval cuticle protein A2B		2	NC_035108.1	177534220	177582164	plus	4
LOC5570295	834.984	0.9267	0.142544	6.50114	7.97e-11	2.39e-09	LOC5570295	AaeL_AAEL003808, AAEL003808	facilitated trehalose transporter Tret1	facilitated trehalose transporter Tret1|facilitated trehalose transporter Tret1-2 homolog		1	NC_035107.1	44024978	44114354	minus	5
LOC5567014	2020.61	1.15178	0.177222	6.49906	8.08e-11	2.42e-09	LOC5567014	AaeL_AAEL005763, AAEL005763	lysosomal alpha-mannosidase	lysosomal alpha-mannosidase		2	NC_035108.1	436093372	436115581	plus	7
LOC5576475	756.143	-1.04537	0.161014	-6.49238	8.45e-11	2.52e-09	LOC5576475	AaeL_AAEL003760, AAEL002917, AAEL003760	uncharacterized LOC5576475	uncharacterized protein LOC5576475		1	NC_035107.1	108242230	108258261	minus	3
LOC5566495	384.967	1.84327	0.284052	6.48921	8.63e-11	2.57e-09	LOC5566495	AaeL_AAEL005429, AAEL005429	probable 2-oxoglutarate dehydrogenase E1 component DHKTD1 homolog, mitochondrial	probable 2-oxoglutarate dehydrogenase E1 component DHKTD1 homolog, mitochondrial		1	NC_035107.1	80523742	80541306	plus	6
LOC5569899	5534.4	-0.802087	0.12363	-6.4878	8.71e-11	2.59e-09	LOC5569899	AaeL_AAEL007990, AAEL007990	protein starmaker	protein Ycf2|protein starmaker		2	NC_035108.1	36577338	36633887	plus	5
LOC5574665	1552.63	0.919205	0.141762	6.48412	8.93e-11	2.65e-09	LOC5574665	AaeL_AAEL011309, AAEL011309	uridine 5'-monophosphate synthase	uridine 5'-monophosphate synthase		3	NC_035109.1	140216465	140242331	plus	4
LOC5570610	77.2835	-2.38809	0.368749	-6.47621	9.41e-11	2.79e-09	LOC5570610		proline-rich protein 36	proline-rich protein 36		1	NC_035107.1	173712125	173902662	minus	5
LOC5579337	808.877	0.770748	0.119028	6.47537	9.46e-11	2.8e-09	LOC5579337	AaeL_AAEL015561, AAEL010936, AAEL014580, AAEL015561	gamma-glutamyltranspeptidase 1	gamma-glutamyltranspeptidase 1		1	NC_035107.1	139668790	139839801	plus	9
LOC5568587	1346.12	-0.751479	0.116103	-6.47253	9.64e-11	2.84e-09	LOC5568587	AaeL_AAEL001112, AAEL001112	ubiquitin carboxyl-terminal hydrolase 5	ubiquitin carboxyl-terminal hydrolase 5		3	NC_035109.1	406507714	406535964	plus	3
LOC5575828	3529.94	-0.883542	0.136576	-6.46922	9.85e-11	2.9e-09	LOC5575828	AaeL_AAEL012095, AAEL012095	26S proteasome regulatory subunit 4	26S proteasome regulatory subunit 4|26S proteasome regulatory chain 4		1	NC_035107.1	242405	244145	minus	2
LOC5577600	171.093	-1.65727	0.256271	-6.46685	1e-10	2.94e-09	LOC5577600	AaeL_AAEL014420, AAEL003272, AAEL014420	endocuticle structural glycoprotein SgAbd-8	endocuticle structural glycoprotein SgAbd-8		2	NC_035108.1	366354773	366369822	plus	3
LOC110678808	4035.44	-1.29001	0.199531	-6.46521	1.01e-10	2.97e-09	LOC110678808		uncharacterized LOC110678808	uncharacterized protein LOC110678808		3	NC_035109.1	185739412	185740396	minus	2
LOC5578133	486.555	-1.52346	0.235738	-6.46249	1.03e-10	3.01e-09	LOC5578133	AaeL_AAEL015460, AAEL015460	uncharacterized LOC5578133	uncharacterized protein LOC5578133		2	NC_035108.1	37577676	37578774	plus	2
LOC5566421	2411.11	-0.928465	0.143785	-6.45734	1.07e-10	3.11e-09	LOC5566421	AaeL_AAEL005389, AAEL005389, AAEL005396	uncharacterized LOC5566421	uncharacterized protein LOC5566421		2	NC_035108.1	257937303	258228047	minus	12
LOC5578644	1039.01	-1.1319	0.175299	-6.45699	1.07e-10	3.11e-09	LOC5578644	AaeL_AAEL013791, AAEL013791, AAEL013794	uncharacterized LOC5578644	uncharacterized protein LOC5578644		3	NC_035109.1	23444225	23534179	minus	11
LOC110674010	1750.49	1.28486	0.199144	6.45191	1.1e-10	3.21e-09	LOC110674010		von Willebrand factor D and EGF domain-containing protein-like	von Willebrand factor D and EGF domain-containing protein-like		2	NC_035108.1	431897403	431909914	minus	4
LOC5564381	78.1702	2.55286	0.395703	6.45146	1.11e-10	3.22e-09	LOC5564381	AaeL_AAEL014412, AAEL014412, CYP304B2	probable cytochrome P450 304a1	probable cytochrome P450 304a1		1	NC_035107.1	286917099	286931096	plus	3
LOC5568414	1238.27	-2.12986	0.33036	-6.4471	1.14e-10	3.3e-09	LOC5568414	AaeL_AAEL006830, AAEL006830	protein yellow	protein yellow		1	NC_035107.1	83180924	83208379	minus	2
LOC5563925	155.794	1.39509	0.216403	6.44672	1.14e-10	3.31e-09	LOC5563925	AaeL_AAEL014228, AAEL014228	pickpocket protein 28	pickpocket protein 28		3	NC_035109.1	287471641	287473923	plus	4
LOC5573405	134.317	-1.43538	0.222701	-6.44533	1.15e-10	3.33e-09	LOC5573405	AaeL_AAEL009594, AAEL002066, AAEL009592, AAEL009594	uncharacterized LOC5573405	uncharacterized protein LOC5573405|PAN/APPLE-like domain-containing protein		2	NC_035108.1	357025875	357134024	minus	13
LOC5577235	159.837	1.47379	0.228678	6.44483	1.16e-10	3.33e-09	LOC5577235	AaeL_AAEL003150, AAEL003150	alpha-N-acetylglucosaminidase	alpha-N-acetylglucosaminidase		3	NC_035109.1	270013498	270016125	minus	4
LOC5567015	975.907	1.95287	0.303071	6.44359	1.17e-10	3.35e-09	LOC5567015	AaeL_AAEL005749, AAEL005749	lysosomal alpha-mannosidase	lysosomal alpha-mannosidase		2	NC_035108.1	436191252	436213341	plus	3
LOC5570040	1894.05	-0.716386	0.111297	-6.4367	1.22e-10	3.5e-09	LOC5570040	AaeL_AAEL000200, AAEL000200	uncharacterized LOC5570040	uncharacterized protein LOC5570040|Vago protein		3	NC_035109.1	215597130	215597712	minus	3
LOC5566981	9234.61	1.44925	0.225255	6.43384	1.24e-10	3.56e-09	LOC5566981	AaeL_AAEL005740, AAEL005740, AAEL005760	very long-chain-fatty-acid--CoA ligase bubblegum	very long-chain-fatty-acid--CoA ligase bubblegum		2	NC_035108.1	437113865	437236696	minus	11
LOC5580182	353.941	1.12174	0.174564	6.42596	1.31e-10	3.74e-09	LOC5580182	AaeL_AAEL002560, AAEL002560	prion-like-(Q/N-rich) domain-bearing protein 25	prion-like-(Q/N-rich) domain-bearing protein 25		1	NC_035107.1	226836960	226933416	plus	10
LOC5564988	245.925	1.33115	0.207415	6.41782	1.38e-10	3.94e-09	LOC5564988	AaeL_AAEL004524, AAEL004524, CLIPC5B	serine protease persephone	serine protease persephone		1	NC_035107.1	64391133	64408488	plus	5
LOC5564048	1457.48	0.696416	0.108534	6.41656	1.39e-10	3.97e-09	LOC5564048	AaeL_AAEL004045, AAEL004045	maestro heat-like repeat-containing protein family member 1	maestro heat-like repeat-containing protein family member 1		1	NC_035107.1	135586676	135623114	plus	9
LOC5571666	241.38	-1.77236	0.276418	-6.41188	1.44e-10	4.08e-09	LOC5571666	AaeL_AAEL001671, AAEL001671	uncharacterized LOC5571666	uncharacterized protein LOC5571666		2	NC_035108.1	299084970	299184935	plus	4
LOC5571619	48.7257	-3.86575	0.603543	-6.40509	1.5e-10	4.26e-09	LOC5571619	AaeL_AAEL009203, AAEL009203	glucose dehydrogenase [FAD, quinone]	glucose dehydrogenase [FAD, quinone]		3	NC_035109.1	390863424	390878966	minus	4
LOC5565945	139.046	1.50378	0.234931	6.40093	1.54e-10	4.37e-09	LOC5565945	AaeL_AAEL005058, AAEL005058	protein cereblon homolog	protein cereblon homolog		1	NC_035107.1	294957306	294967982	minus	4
LOC110679080	189.83	1.88306	0.294216	6.40025	1.55e-10	4.38e-09	LOC110679080		uncharacterized LOC110679080	uncharacterized protein LOC110679080		3	NC_035109.1	37245327	37246414	plus	2
LOC5578122	21323.3	-1.4342	0.224091	-6.4001	1.55e-10	4.38e-09	LOC5578122	AaeL_AAEL003425, AAEL003425	uncharacterized LOC5578122	uncharacterized protein LOC5578122		3	NC_035109.1	350173617	350191549	minus	6
LOC5576558	1470.65	-0.903603	0.141353	-6.39254	1.63e-10	4.59e-09	LOC5576558	AaeL_AAEL012613, AAEL012613	general transcriptional corepressor trfA	general transcriptional corepressor trfA|nuclear pore complex protein DDB_G0274915|probable serine/threonine-protein kinase DDB_G0282963		1	NC_035107.1	146403790	146426666	plus	2
LOC5579955	40.1318	4.94989	0.774595	6.39029	1.66e-10	4.65e-09	LOC5579955	AaeL_AAEL007592, AAEL007592	mite group 2 allergen Tyr p 2	mite group 2 allergen Tyr p 2		1	NC_035107.1	302937543	302938194	minus	2
LOC5564472	3926.54	-0.927101	0.145193	-6.3853	1.71e-10	4.79e-09	LOC5564472	AaeL_AAEL014456, AAEL014456	uncharacterized LOC5564472	uncharacterized protein LOC5564472		2	NC_035108.1	118726499	118774418	minus	5
LOC5580145	186.769	2.12686	0.333108	6.38491	1.71e-10	4.8e-09	LOC5580145	AaeL_AAEL002447, AAEL002447	uncharacterized LOC5580145	uncharacterized protein LOC5580145		3	NC_035109.1	127764641	127765584	minus	3
LOC110674215	290.024	1.52541	0.23913	6.37899	1.78e-10	4.97e-09	LOC110674215	AaeL_AAEL005823, AAEL005823	venom protease-like	venom protease-like		1	NC_035107.1	302509420	302510572	minus	3
LOC5572494	1133.28	-1.62667	0.255088	-6.3769	1.81e-10	5.03e-09	LOC5572494	AaeL_AAEL009831, AAEL009831, AAEL014101, P5CR-2	pyrroline-5-carboxylate reductase 1, mitochondrial	pyrroline-5-carboxylate reductase 1, mitochondrial		2	NC_035108.1	191379637	191390956	minus	4
LOC5568403	4803.79	0.997428	0.156497	6.37347	1.85e-10	5.14e-09	LOC5568403	AaeL_AAEL006820, AAEL006820	lipid storage droplets surface-binding protein 2	lipid storage droplets surface-binding protein 2		1	NC_035107.1	53022014	53035486	plus	3
LOC5571030	3786.8	-1.40008	0.219702	-6.37263	1.86e-10	5.16e-09	LOC5571030	AaeL_AAEL008764, AAEL008764	pro-resilin	pro-resilin		3	NC_035109.1	326503140	326548396	plus	5
LOC5574100	1224.97	-0.800593	0.125725	-6.36782	1.92e-10	5.3e-09	LOC5574100	AaeL_AAEL002271, AAEL002271	COP9 signalosome complex subunit 3	COP9 signalosome complex subunit 3		2	NC_035108.1	30859424	30882808	plus	7
LOC5576893	94.0662	-2.09812	0.329491	-6.36778	1.92e-10	5.3e-09	LOC5576893		uncharacterized LOC5576893	uncharacterized protein LOC5576893		1	NC_035107.1	129269074	129302734	plus	3
LOC5577717	3953.88	-0.905648	0.14226	-6.36614	1.94e-10	5.35e-09	LOC5577717	AaeL_AAEL013341, AAEL013341	protein lethal(2)essential for life	protein lethal(2)essential for life		2	NC_035108.1	135655602	135657032	minus	4
LOC5568363	1920.05	1.37055	0.215419	6.36227	1.99e-10	5.47e-09	LOC5568363	AaeL_AAEL001077, AAEL001077, CLIPB45	serine protease easter	serine protease easter		1	NC_035107.1	299609329	299611588	minus	4
LOC5575341	3089.52	-1.07415	0.168963	-6.35729	2.05e-10	5.64e-09	LOC5575341	AaeL_AAEL002606, AAEL002606	general odorant-binding protein 56d	general odorant-binding protein 56d		3	NC_035109.1	257164371	257165378	minus	3
LOC5576921	375.531	-1.34137	0.211052	-6.35562	2.08e-10	5.69e-09	LOC5576921	AaeL_AAEL012859, AAEL012859	uncharacterized LOC5576921	uncharacterized protein LOC5576921		1	NC_035107.1	222220777	222221789	minus	3
LOC5569807	554.344	1.10046	0.173154	6.3554	2.08e-10	5.69e-09	LOC5569807	AaeL_AAEL001287, AAEL001287	uncharacterized LOC5569807	uncharacterized protein LOC5569807		2	NC_035108.1	448094142	448116633	minus	4
LOC5575357	209.403	-2.00189	0.315376	-6.34761	2.19e-10	5.98e-09	LOC5575357	AaeL_AAEL011768, AAEL011768	mucin-5AC	mucin-5AC		2	NC_035108.1	168900719	168929305	plus	2
LOC5576729	1508.99	0.782508	0.123297	6.34656	2.2e-10	6.01e-09	LOC5576729	AaeL_AAEL002950, AAEL002950	uncharacterized LOC5576729	uncharacterized protein LOC5576729		1	NC_035107.1	261273055	261298399	plus	4
LOC5572260	2573.07	-0.971236	0.153091	-6.34418	2.24e-10	6.09e-09	LOC5572260	AaeL_AAEL009695, AAEL009695	venom allergen 5.02	venom allergen 5.02		3	NC_035109.1	35867476	35894932	plus	4
LOC110674086	110.744	-1.92839	0.304106	-6.34118	2.28e-10	6.2e-09	LOC110674086		uncharacterized LOC110674086	uncharacterized protein LOC110674086		1	NC_035107.1	255455486	255570215	minus	3
LOC5565721	2767.37	0.653036	0.102992	6.34064	2.29e-10	6.21e-09	LOC5565721	AaeL_AAEL004957, AAEL004957	uncharacterized LOC5565721	uncharacterized protein LOC5565721		3	NC_035109.1	323244845	323319903	plus	6
LOC5572540	633.383	-1.07089	0.168963	-6.33804	2.33e-10	6.3e-09	LOC5572540	AaeL_AAEL009876, AAEL009876	uncharacterized LOC5572540	uncharacterized protein LOC5572540		1	NC_035107.1	91887902	91942290	minus	6
LOC5564013	6819.37	-1.14022	0.179917	-6.33748	2.34e-10	6.31e-09	LOC5564013	AaeL_AAEL014274, AAEL014274	clumping factor B	uncharacterized protein LOC5564013		1	NC_035107.1	83863369	83962068	minus	8
LOC5571814	5614.11	-1.65861	0.261784	-6.33579	2.36e-10	6.37e-09	LOC5571814	AaeL_AAEL001704, AAEL001704	uncharacterized LOC5571814	uncharacterized protein LOC5571814		2	NC_035108.1	86030197	86030989	minus	2
LOC5577462	529.721	1.26915	0.200398	6.33312	2.4e-10	6.47e-09	LOC5577462	AaeL_AAEL013211, AAEL013211	triokinase/FMN cyclase	triokinase/FMN cyclase		2	NC_035108.1	186074726	186076468	minus	1
LOC5576202	834.156	-0.939109	0.148322	-6.33156	2.43e-10	6.52e-09	LOC5576202	AaeL_AAEL012393, AAEL012393	uncharacterized LOC5576202	uncharacterized protein LOC5576202		1	NC_035107.1	284563704	284614525	minus	14
LOC110680229	2723.91	-0.91251	0.144206	-6.32783	2.49e-10	6.67e-09	LOC110680229		uncharacterized LOC110680229	uncharacterized protein LOC110680229		Un	NW_018734490.1	24882	35555	minus	3
LOC5574541	1435.55	-0.736814	0.116545	-6.32215	2.58e-10	6.9e-09	LOC5574541	AaeL_AAEL011209, AAEL011209	protein ABHD16A	protein ABHD16A		2	NC_035108.1	194615015	194632764	plus	8
LOC5574731	1747.07	0.871613	0.137911	6.32009	2.61e-10	6.98e-09	LOC5574731	AaeL_AAEL011371, AAEL011371	uncharacterized LOC5574731	uncharacterized protein LOC5574731		2	NC_035108.1	266415635	266423540	minus	3
LOC5573533	481.315	1.41819	0.224596	6.31438	2.71e-10	7.23e-09	LOC5573533	AaeL_AAEL010590, AAEL010590	aldose 1-epimerase	aldose 1-epimerase		1	NC_035107.1	301317632	301330935	plus	3
LOC5564242	2466.58	1.32251	0.209564	6.31076	2.78e-10	7.39e-09	LOC5564242	AaeL_AAEL004188, AAEL004188	uncharacterized LOC5564242	uncharacterized protein LOC5564242		2	NC_035108.1	146408610	146411572	plus	2
LOC5572108	5597.04	1.24589	0.197467	6.30939	2.8e-10	7.44e-09	LOC5572108	AaeL_AAEL009520, AAEL009520	uncharacterized LOC5572108	uncharacterized protein LOC5572108		2	NC_035108.1	180600830	180653079	minus	7
LOC5568654	927.945	0.9661	0.153257	6.30379	2.9e-10	7.69e-09	LOC5568654	AaeL_AAEL007024, AAEL007024, CYP6AG3	probable cytochrome P450 28a5	probable cytochrome P450 28a5|cytochrome P450		3	NC_035109.1	171374109	171380654	minus	4
LOC5577658	1203.6	1.54133	0.244517	6.30357	2.91e-10	7.69e-09	LOC5577658	AaeL_AAEL003279, AAEL003279, AAEL801267	melanization protease 1	melanization protease 1		1	NC_035107.1	290940635	290942853	plus	4
LOC5570228	1189.51	-0.990027	0.157062	-6.30342	2.91e-10	7.69e-09	LOC5570228	AaeL_AAEL008185, AAEL008185	arrestin domain-containing protein 17	arrestin domain-containing protein 17		3	NC_035109.1	9924800	9951573	minus	3
LOC5564080	516.052	-0.906167	0.143849	-6.29944	2.99e-10	7.88e-09	LOC5564080	AaeL_AAEL014298, AAEL014298, AAEL014299	probable serine/threonine-protein kinase cdc7	probable serine/threonine-protein kinase cdc7		1	NC_035107.1	202439737	202640686	plus	9
LOC5567565	5427.56	0.848288	0.134707	6.29727	3.03e-10	7.97e-09	LOC5567565	AaeL_AAEL006169, AAEL006169, ASPP_AEDAE	lysosomal aspartic protease	lysosomal aspartic protease|aspartic protease		1	NC_035107.1	126030009	126032003	plus	5
LOC5566868	248.06	1.59987	0.254289	6.29153	3.14e-10	8.26e-09	LOC5566868	AaeL_AAEL000800, AAEL000800	dipeptidase 1	dipeptidase 1		3	NC_035109.1	363635713	363661346	plus	4
LOC5567358	273.642	1.45289	0.231028	6.28881	3.2e-10	8.39e-09	LOC5567358	AaeL_AAEL006023, AAEL006023	vanin-like protein 1	vanin-like protein 1		3	NC_035109.1	315542318	315544574	minus	4
LOC5572082	10923.6	-1.18197	0.188061	-6.28506	3.28e-10	8.58e-09	LOC5572082	AaeL_AAEL009510, AAEL009510	glutamine--fructose-6-phosphate aminotransferase [isomerizing] 2	glutamine--fructose-6-phosphate aminotransferase [isomerizing] 2|glucosamine-fructose-6-phosphate aminotransferase		3	NC_035109.1	345007024	345010930	minus	1
LOC5569417	179.646	1.46739	0.233575	6.2823	3.34e-10	8.72e-09	LOC5569417	AaeL_AAEL017523, AAEL015215, AAEL017523, TOLL4	protein toll	protein toll|toll-related protein Toll1y		1	NC_035107.1	42849170	42873595	plus	2
LOC5565788	7332.1	1.26786	0.202013	6.27614	3.47e-10	9.05e-09	LOC5565788	AaeL_AAEL014972, AAEL014972	facilitated trehalose transporter Tret1	facilitated trehalose transporter Tret1		2	NC_035108.1	147753315	147785363	plus	6
LOC5573419	163.491	1.52168	0.242488	6.2753	3.49e-10	9.09e-09	LOC5573419	AaeL_AAEL008406, AAEL008406	b(0,+)-type amino acid transporter 1	b(0,+)-type amino acid transporter 1		2	NC_035108.1	119926090	119949012	plus	5
LOC5574980	2524.06	-0.763084	0.121619	-6.27436	3.51e-10	9.12e-09	LOC5574980	AaeL_AAEL002508, AAEL002508	26S proteasome regulatory subunit 6A-B	26S proteasome regulatory subunit 6A-B		1	NC_035107.1	90362352	90375084	minus	2
LOC5577131	274.626	1.76501	0.281341	6.27354	3.53e-10	9.16e-09	LOC5577131	AaeL_AAEL013029, AAEL002042, AAEL013029	uncharacterized LOC5577131	uncharacterized protein LOC5577131		2	NC_035108.1	203659053	203678625	minus	5
LOC5573116	1325.53	0.85806	0.136947	6.26565	3.71e-10	9.62e-09	LOC5573116	AaeL_AAEL002031, AAEL002031, CYP12F7	cytochrome P450 CYP12A2	cytochrome P450 CYP12A2		2	NC_035108.1	423992667	424001455	minus	7
LOC5575162	17792.6	-0.71161	0.113598	-6.26429	3.75e-10	9.68e-09	LOC5575162	AaeL_AAEL000328, AAEL000328	zinc-type alcohol dehydrogenase-like protein C1773.06c	zinc-type alcohol dehydrogenase-like protein C1773.06c		2	NC_035108.1	368783398	368876030	plus	8
LOC110680887	10633.3	0.897061	0.143246	6.26239	3.79e-10	9.78e-09	LOC110680887		opsin-1-like	opsin-1-like		Un	NW_018735450.1	32930	34373	minus	2
LOC5570163	3484.51	0.741615	0.118518	6.25741	3.91e-10	1.01e-08	LOC5570163	AaeL_AAEL008144, AAEL008144	long-chain fatty acid transport protein 4	long-chain fatty acid transport protein 4		3	NC_035109.1	302074852	302150000	minus	13
LOC5572377	390.006	1.24347	0.198849	6.25332	4.02e-10	1.03e-08	LOC5572377	AaeL_AAEL009765, AAEL009765	ethanolamine kinase	ethanolamine kinase		1	NC_035107.1	4152926	4199682	plus	5
LOC5574312	1382.3	-0.984956	0.157515	-6.25308	4.02e-10	1.03e-08	LOC5574312	AaeL_AAEL011078, AAEL011078, CTLGA1	L-selectin	L-selectin		2	NC_035108.1	278206505	278286319	plus	4
LOC110675652	66.3704	-1.86782	0.298781	-6.25147	4.07e-10	1.04e-08	LOC110675652		uncharacterized LOC110675652			2	NC_035108.1	73120530	73256478	minus	6
LOC5570144	210.195	1.15897	0.185526	6.24696	4.19e-10	1.07e-08	LOC5570144	AaeL_AAEL008117, AAEL008117	uncharacterized LOC5570144	uncharacterized protein LOC5570144		3	NC_035109.1	14211977	14216346	minus	2
LOC5578121	1504.57	-0.767467	0.122907	-6.24428	4.26e-10	1.09e-08	LOC5578121	AaeL_AAEL003431, AAEL003431	proteasome subunit beta type-7	proteasome subunit beta type-7		3	NC_035109.1	350152108	350153267	plus	2
LOC5570687	152.3	1.681	0.26927	6.24283	4.3e-10	1.1e-08	LOC5570687	AaeL_AAEL008501, AAEL008501	uncharacterized LOC5570687	uncharacterized protein LOC5570687		2	NC_035108.1	395103744	395105709	plus	5
LOC5573748	332.257	-1.34197	0.215071	-6.23968	4.38e-10	1.12e-08	LOC5573748	AaeL_AAEL000298, AAEL000298	sodium- and chloride-dependent glycine transporter 2	sodium- and chloride-dependent glycine transporter 2		3	NC_035109.1	265255228	265284337	minus	7
LOC5573623	8432.22	-1.2264	0.196672	-6.23573	4.5e-10	1.14e-08	LOC5573623	AaeL_AAEL010602, AAEL010602	1,4-alpha-glucan-branching enzyme	1,4-alpha-glucan-branching enzyme		3	NC_035109.1	291598938	291622183	minus	4
LOC5570989	363.085	-0.87461	0.140275	-6.23495	4.52e-10	1.15e-08	LOC5570989	AaeL_AAEL008719, AAEL008719	probable small nuclear ribonucleoprotein G	probable small nuclear ribonucleoprotein G		3	NC_035109.1	189389137	189393789	minus	3
LOC5568075	918.188	1.05297	0.168966	6.23188	4.61e-10	1.17e-08	LOC5568075	AaeL_AAEL006526, AAEL006526, AAEL801212	acetylcholine receptor subunit alpha-like 1	acetylcholine receptor subunit alpha-like 1		2	NC_035108.1	468715278	468732142	minus	6
LOC5572333	1432.78	1.27012	0.20391	6.22883	4.7e-10	1.19e-08	LOC5572333	AaeL_AAEL009722, AAEL009722, AAEL017507	proclotting enzyme	proclotting enzyme		1	NC_035107.1	209734678	209748918	minus	4
LOC5579168	1540.99	-1.01776	0.163704	-6.21708	5.06e-10	1.28e-08	LOC5579168	AaeL_AAEL003871, AAEL003871	proteasome subunit alpha type-3	proteasome subunit alpha type-3		3	NC_035109.1	84625151	84627068	minus	4
LOC23687722	1844.16	-1.38104	0.222338	-6.21142	5.25e-10	1.32e-08	LOC23687722	AaeL_AAEL017302, AAEL017302, AaSDR-1, FOHSDR-1, SDR-1	farnesol dehydrogenase	farnesol dehydrogenase|NADP(+)-dependent farnesol dehydrogenase 1|NADP+-dependent farnesol dehydrogenase 1		3	NC_035109.1	347276443	347277459	plus	2
LOC5578826	373.624	-0.952937	0.153428	-6.21099	5.27e-10	1.32e-08	LOC5578826	AaeL_AAEL013864, AAEL013864	progestin and adipoQ receptor family member 3	progestin and adipoQ receptor family member 3		1	NC_035107.1	119087319	119190892	plus	12
LOC5572996	40.7751	-2.45788	0.395741	-6.21083	5.27e-10	1.32e-08	LOC5572996	AaeL_AAEL001949, AAEL001949	uncharacterized LOC5572996	uncharacterized protein LOC5572996		3	NC_035109.1	226817834	226826520	minus	4
LOC5575618	103.073	-1.79314	0.288992	-6.20481	5.48e-10	1.37e-08	LOC5575618	AaeL_AAEL011957, AAEL011957	elongation of very long chain fatty acids protein 4	elongation of very long chain fatty acids protein 4		2	NC_035108.1	217948079	217949519	minus	4
LOC5564878	48036.4	-0.932797	0.150343	-6.20446	5.49e-10	1.37e-08	LOC5564878	AaeL_AAEL004457, AAEL004457	cytochrome c-2	cytochrome c-2		2	NC_035108.1	473309856	473316087	plus	3
LOC5564849	366.601	1.37882	0.222332	6.20162	5.59e-10	1.39e-08	LOC5564849	AaeL_AAEL000629, AAEL000629	GTP:AMP phosphotransferase AK3, mitochondrial	GTP:AMP phosphotransferase AK3, mitochondrial		2	NC_035108.1	285133209	285134360	minus	2
LOC5579377	482.967	1.58912	0.256393	6.19798	5.72e-10	1.42e-08	LOC5579377		cecropin-like LOC5579377	cecropin-like LOC5579377		1	NC_035107.1	84541907	84542309	minus	2
LOC5564121	573.905	1.36243	0.219886	6.19608	5.79e-10	1.44e-08	LOC5564121	AaeL_AAEL004090, AAEL004090	protein SERAC1	protein SERAC1		3	NC_035109.1	401416707	401427316	plus	6
LOC5566051	1063.79	-1.40559	0.226855	-6.19599	5.79e-10	1.44e-08	LOC5566051	AaeL_AAEL005135, AAEL005135, AAEL005144	mucin-5AC	mucin-5AC		3	NC_035109.1	346885841	347093560	plus	11
LOC5565419	70.9823	1.64743	0.265914	6.19534	5.82e-10	1.44e-08	LOC5565419		uncharacterized LOC5565419	uncharacterized protein LOC5565419		Un	NW_018736192.1	1464	3308	minus	4
LOC5574456	1743.16	-1.18578	0.191546	-6.19058	5.99e-10	1.48e-08	LOC5574456	AaeL_AAEL010392, AAEL010392, AAEL011177	uncharacterized LOC5574456	uncharacterized protein LOC5574456		2	NC_035108.1	182368199	182375834	plus	5
LOC5568476	191.325	1.65182	0.267009	6.18638	6.16e-10	1.52e-08	LOC5568476	AaeL_AAEL006886, AAEL006886	growth arrest and DNA damage-inducible protein GADD45 alpha	growth arrest and DNA damage-inducible protein GADD45 alpha		2	NC_035108.1	24739625	24740925	plus	2
LOC5568986	36757.2	-0.780644	0.126214	-6.18508	6.21e-10	1.53e-08	LOC5568986	AaeL_AAEL007306, AAEL007306	alpha-actinin, sarcomeric	alpha-actinin, sarcomeric		3	NC_035109.1	196805951	196846237	plus	13
LOC5571066	1052.71	0.968601	0.156624	6.18426	6.24e-10	1.54e-08	LOC5571066	AaeL_AAEL008823, AAEL008823	RAC serine/threonine-protein kinase	RAC serine/threonine-protein kinase|serine/threonine protein kinase Akt		3	NC_035109.1	133187140	133240446	plus	7
LOC5567373	401.708	1.33852	0.216496	6.18265	6.3e-10	1.55e-08	LOC5567373	AaeL_AAEL006028, AAEL006028	vitellogenin-3	vitellogenin-3		3	NC_035109.1	33450812	33490790	plus	10
LOC5571642	1031.57	-0.755987	0.122475	-6.17256	6.72e-10	1.65e-08	LOC5571642	AaeL_AAEL001649, AAEL001649	probable aminopeptidase NPEPL1	probable aminopeptidase NPEPL1		2	NC_035108.1	300321366	300325055	plus	3
LOC5579027	6672.92	1.01669	0.165043	6.16011	7.27e-10	1.78e-08	LOC5579027	AaeL_AAEL013966, AAEL013966	ATP-dependent Clp protease ATP-binding subunit clpX-like, mitochondrial	ATP-dependent Clp protease ATP-binding subunit clpX-like, mitochondrial		3	NC_035109.1	10428270	10574779	minus	9
LOC5570622	2638.02	1.26095	0.204747	6.1586	7.34e-10	1.79e-08	LOC5570622	AaeL_AAEL008428, AAEL008428	uncharacterized LOC5570622	uncharacterized protein LOC5570622		1	NC_035107.1	205444173	205447302	plus	5
LOC5564399	3556.96	0.626084	0.101763	6.15238	7.63e-10	1.86e-08	LOC5564399	AaeL_AAEL004227, AAEL004227	myosin heavy chain 95F	myosin heavy chain 95F		1	NC_035107.1	105059433	105154012	minus	16
LOC5576735	48.0911	-2.21049	0.359395	-6.15059	7.72e-10	1.88e-08	LOC5576735	AaeL_AAEL002952, AAEL002952, AAEL002966	uncharacterized LOC5576735	uncharacterized protein LOC5576735		1	NC_035107.1	262124563	262300492	minus	9
LOC5571045	1276.14	-0.746519	0.121411	-6.14871	7.81e-10	1.9e-08	LOC5571045	AaeL_AAEL008770, AAEL008770	proteasome subunit beta type-1	proteasome subunit beta type-1		2	NC_035108.1	198810546	198811564	minus	2
LOC5567233	239.821	-1.9446	0.316612	-6.1419	8.15e-10	1.98e-08	LOC5567233	AaeL_AAEL000878, AAEL000878	cuticle protein	cuticle protein		3	NC_035109.1	332483976	332485212	plus	2
LOC5563966	4562.9	0.939953	0.15313	6.13827	8.34e-10	2.02e-08	LOC5563966	AaeL_AAEL004027, AAEL004025, AAEL004027	glucose dehydrogenase [FAD, quinone]	glucose dehydrogenase [FAD, quinone]		3	NC_035109.1	166351710	166405437	plus	7
LOC5571188	497.656	0.962482	0.157046	6.12865	8.86e-10	2.14e-08	LOC5571188	AaeL_AAEL008879, AAEL008879, AAEL012757, KMO_AEDAE, kh	kynurenine 3-monooxygenase	kynurenine 3-monooxygenase|Kynurenine 3-hydroxylase|kynurenine monooxygenase|mutant kynurenine monooxygenase		2	NC_035108.1	127230326	127250994	minus	7
LOC5573501	241.214	2.30629	0.376492	6.12573	9.03e-10	2.18e-08	LOC5573501		maltase 1			2	NC_035108.1	314990665	315000962	plus	3
LOC5572188	806.912	1.36052	0.222191	6.1232	9.17e-10	2.21e-08	LOC5572188	AaeL_AAEL009596, AAEL009596	sterol O-acyltransferase 1	sterol O-acyltransferase 1		3	NC_035109.1	328699509	328711984	minus	4
LOC5576787	284.241	1.50428	0.245815	6.11958	9.38e-10	2.26e-08	LOC5576787	AaeL_AAEL012763, AAEL012763	uncharacterized LOC5576787	uncharacterized protein LOC5576787		3	NC_035109.1	111948477	111950209	plus	2
LOC5564816	2652.12	-0.912635	0.149238	-6.11531	9.64e-10	2.32e-08	LOC5564816	AaeL_AAEL003587, AAEL003587, AAEL014636	rho-related BTB domain-containing protein 1	rho-related BTB domain-containing protein 1		2	NC_035108.1	125976016	126130715	minus	17
LOC110675667	2239.73	-0.693568	0.113441	-6.11389	9.72e-10	2.33e-08	LOC110675667		mitochondrial import receptor subunit TOM22 homolog	mitochondrial import receptor subunit TOM22 homolog		2	NC_035108.1	76171723	76188459	plus	3
LOC5576789	153.547	2.78196	0.455053	6.11348	9.75e-10	2.34e-08	LOC5576789	AaeL_AAEL012772, AAEL012772, CYP325G3	cytochrome P450 4C1	cytochrome P450 4C1		3	NC_035109.1	111598121	111599971	plus	4
LOC110681328	8088.18	0.889489	0.145563	6.11067	9.92e-10	2.37e-08	LOC110681328	AaeL_AAEL013297, AAEL013297, AAEL017153, cystatin	uncharacterized LOC110681328	uncharacterized protein LOC110681328|putative cysteine proteinase		Un	NW_018736407.1	5539	25985	plus	7
LOC5564272	361.163	-0.932177	0.152591	-6.10899	1e-09	2.39e-08	LOC5564272	AaeL_AAEL014368, AAEL014368	histone deacetylase complex subunit SAP18	histone deacetylase complex subunit SAP18		3	NC_035109.1	110908766	110932979	minus	2
LOC5570922	2509.26	1.39016	0.227575	6.10858	1.01e-09	2.4e-08	LOC5570922	AaeL_AAEL001503, AAEL001503, NHE3	sodium/hydrogen exchanger 3	sodium/hydrogen exchanger 3|Na+/H+ antiporter|Na+/H+ exchanger		2	NC_035108.1	261762679	262069202	minus	31
LOC5567196	667.529	0.861234	0.141082	6.10449	1.03e-09	2.45e-08	LOC5567196	AaeL_AAEL000886, AAEL000886, SGP3H1	uncharacterized LOC5567196	uncharacterized protein LOC5567196|putative 8.5 kDa secreted peptide|putative secreted protein		3	NC_035109.1	334895519	334896054	plus	1
LOC5563575	6054.03	1.8846	0.308997	6.09907	1.07e-09	2.53e-08	LOC5563575	AaeL_AAEL000080, AAEL000080	phosphoenolpyruvate carboxykinase [GTP]	phosphoenolpyruvate carboxykinase [GTP]		3	NC_035109.1	102694137	102696809	minus	3
LOC5565448	1137.15	2.06216	0.338209	6.09728	1.08e-09	2.56e-08	LOC5565448	AaeL_AAEL000668, AAEL000668	protein flightless-1 homolog	protein flightless-1 homolog		3	NC_035109.1	395376851	395378817	minus	2
LOC5568005	358.659	-1.51876	0.249544	-6.08613	1.16e-09	2.74e-08	LOC5568005	AaeL_AAEL006442, AAEL006442	MDS1 and EVI1 complex locus protein EVI1	MDS1 and EVI1 complex locus protein EVI1		2	NC_035108.1	439735982	440057581	minus	4
LOC23687759	412.746	-0.964861	0.15854	-6.0859	1.16e-09	2.74e-08	LOC23687759		BTB/POZ domain-containing adapter for CUL3-mediated RhoA degradation protein 3	BTB/POZ domain-containing adapter for CUL3-mediated RhoA degradation protein 3		2	NC_035108.1	209309333	209323935	minus	2
LOC5570339	1777.09	0.761084	0.125161	6.08084	1.2e-09	2.82e-08	LOC5570339	AaeL_AAEL001393, AAEL001383, AAEL001384, AAEL001393	triple functional domain protein	triple functional domain protein		2	NC_035108.1	205169266	205467510	plus	17
LOC5566166	4301.83	0.943984	0.155344	6.07675	1.23e-09	2.89e-08	LOC5566166	AaeL_AAEL005221, AAEL005221	leucine-rich repeat-containing protein 58	leucine-rich repeat-containing protein 58		3	NC_035109.1	88801772	88842068	minus	9
LOC5570385	4975.53	-1.36823	0.225388	-6.07058	1.27e-09	3e-08	LOC5570385	AaeL_AAEL008285, AAEL008285	cuticle protein CP14.6	cuticle protein CP14.6		2	NC_035108.1	67420433	67428123	minus	2
LOC5566832	718.975	1.31111	0.216029	6.06915	1.29e-09	3.02e-08	LOC5566832	AaeL_AAEL005665, AAEL005665, SRPN3	serine protease inhibitor 27A	serine protease inhibitor 27A		2	NC_035108.1	132297829	132307971	plus	4
LOC5565057	86.2083	-1.87717	0.309358	-6.06796	1.3e-09	3.04e-08	LOC5565057		uncharacterized LOC5565057	uncharacterized protein LOC5565057		Un	NW_018734893.1	6263	23476	minus	3
LOC110677706	103.86	2.4655	0.406324	6.06781	1.3e-09	3.04e-08	LOC110677706		uncharacterized LOC110677706			3	NC_035109.1	267136664	267137215	plus	3
LOC5577450	275.744	-1.21741	0.200762	-6.06395	1.33e-09	3.1e-08	LOC5577450	AaeL_AAEL013197, AAEL013197	uncharacterized LOC5577450	uncharacterized protein LOC5577450		3	NC_035109.1	84323792	84341355	plus	2
LOC5576907	686.011	1.3143	0.216943	6.05827	1.38e-09	3.21e-08	LOC5576907	AaeL_AAEL012858, AAEL012858	uncharacterized LOC5576907	uncharacterized protein LOC5576907		3	NC_035109.1	339263645	339265247	minus	1
LOC5564041	2577.28	-0.927493	0.153127	-6.05703	1.39e-09	3.23e-08	LOC5564041	AaeL_AAEL004042, AAEL004042	probable glucosamine 6-phosphate N-acetyltransferase	probable glucosamine 6-phosphate N-acetyltransferase|glucosamine-6-phosphate N-acetyltransferase		1	NC_035107.1	135747648	135758659	minus	5
LOC5566102	131.373	1.41527	0.233689	6.05621	1.39e-09	3.24e-08	LOC5566102	AaeL_AAEL011176, AAEL011175, AAEL011176, AAEL015070, ALP	membrane-bound alkaline phosphatase	membrane-bound alkaline phosphatase		2	NC_035108.1	182283496	182322514	minus	7
LOC5568346	127.017	-2.95035	0.487924	-6.04675	1.48e-09	3.43e-08	LOC5568346	AaeL_AAEL001054, AAEL001054, GSTD4	glutathione S-transferase 1	glutathione S-transferase 1		1	NC_035107.1	301212310	301213169	minus	2
LOC5566392	990.478	-0.821214	0.135892	-6.04314	1.51e-09	3.5e-08	LOC5566392	AaeL_AAEL005342, AAEL005342	protein ABHD18	protein ABHD18		3	NC_035109.1	34221201	34240878	plus	4
LOC5564652	970.644	0.821963	0.136081	6.04026	1.54e-09	3.56e-08	LOC5564652	AaeL_AAEL004379, AAEL004379	phosphatidylinositol 4-kinase type 2-alpha	phosphatidylinositol 4-kinase type 2-alpha		3	NC_035109.1	93109907	93185242	minus	6
LOC5571293	49010.4	-0.628385	0.104094	-6.0367	1.57e-09	3.63e-08	LOC5571293	AaeL_AAEL001593, AAEL001593	glycerol-3-phosphate dehydrogenase [NAD(+)], cytoplasmic	glycerol-3-phosphate dehydrogenase [NAD(+)], cytoplasmic		2	NC_035108.1	21097629	21159210	minus	8
LOC23687956	19274.3	1.72293	0.285424	6.03637	1.58e-09	3.64e-08	LOC23687956	AaeL_AAEL017536, AAEL017536, GRRP	holotricin-3	holotricin-3		2	NC_035108.1	205873702	205887578	minus	4
LOC5572527	147.803	1.17645	0.194901	6.03613	1.58e-09	3.64e-08	LOC5572527	AaeL_AAEL009858, AAEL009858	SIFamide-related peptide	SIFamide-related peptide		2	NC_035108.1	164629484	164630298	plus	2
LOC5573574	5864.15	-0.852935	0.141421	-6.03118	1.63e-09	3.74e-08	LOC5573574	AaeL_AAEL002118, AAEL002118	ubiquitin-conjugating enzyme E2-17 kDa	ubiquitin-conjugating enzyme E2-17 kDa		3	NC_035109.1	178513068	178551067	minus	3
LOC110677098	7689.53	-1.33937	0.222082	-6.03098	1.63e-09	3.74e-08	LOC110677098		pollen-specific leucine-rich repeat extensin-like protein 4	pollen-specific leucine-rich repeat extensin-like protein 4		2	NC_035108.1	432348471	432350650	plus	2
LOC5564249	4692.98	0.630052	0.104483	6.03016	1.64e-09	3.75e-08	LOC5564249	AaeL_AAEL004195, AAEL004195	membrane-associated progesterone receptor component 1	membrane-associated progesterone receptor component 1		1	NC_035107.1	15672099	15729688	minus	3
LOC5570210	211.945	1.76601	0.293057	6.02616	1.68e-09	3.84e-08	LOC5570210	AaeL_AAEL008163, AAEL008163	aminopeptidase N	aminopeptidase N		3	NC_035109.1	9048178	9051342	plus	5
LOC5575362	886.492	-1.78661	0.2966	-6.02365	1.71e-09	3.9e-08	LOC5575362	AaeL_AAEL011771, AAEL011771	agglutinin-like protein ARB_02240	agglutinin-like protein ARB_02240		2	NC_035108.1	168881061	168885427	plus	2
LOC5566857	1299.41	0.871962	0.144817	6.02111	1.73e-09	3.95e-08	LOC5566857	AaeL_AAEL000834, AAEL000834	senecionine N-oxygenase	senecionine N-oxygenase|flavin-containing monooxygenase		3	NC_035109.1	363894690	363901819	plus	4
LOC5565109	517.945	-0.992318	0.164921	-6.01694	1.78e-09	4.05e-08	LOC5565109	AaeL_AAEL004600, AAEL004600	uncharacterized LOC5565109	uncharacterized protein LOC5565109		2	NC_035108.1	32872874	33496772	minus	10
LOC5568441	6263.61	-0.868123	0.144662	-6.00104	1.96e-09	4.46e-08	LOC5568441	AaeL_AAEL006872, AAEL006872	muscle-specific protein 20	muscle-specific protein 20		3	NC_035109.1	369360378	369374818	plus	3
LOC5578129	2245.85	-1.8986	0.316404	-6.00055	1.97e-09	4.47e-08	LOC5578129	AaeL_AAEL013511, AAEL013511	pupal cuticle protein Edg-84A	pupal cuticle protein Edg-84A		2	NC_035108.1	189776774	189777679	plus	2
LOC5577594	3083.57	-1.43298	0.238946	-5.99711	2.01e-09	4.55e-08	LOC5577594	AaeL_AAEL013303, AAEL013303	integumentary mucin C.1	integumentary mucin C.1		2	NC_035108.1	130250613	130253083	plus	3
LOC5564068	735.988	-0.920718	0.153829	-5.98533	2.16e-09	4.88e-08	LOC5564068	AaeL_AAEL004058, AAEL004058, AAEL004082	uncharacterized LOC5564068	uncharacterized protein LOC5564068		1	NC_035107.1	137218210	137349836	plus	8
LOC5574978	3178.09	0.707936	0.11828	5.98523	2.16e-09	4.88e-08	LOC5574978	AaeL_AAEL002510, AAEL002510	serine hydroxymethyltransferase, cytosolic	serine hydroxymethyltransferase, cytosolic		1	NC_035107.1	90394257	90421721	minus	7
LOC5575191	490.135	-1.00942	0.168771	-5.98099	2.22e-09	5e-08	LOC5575191	AaeL_AAEL000340, AAEL000340	cytochrome P450 4C1	cytochrome P450 4C1		3	NC_035109.1	112007456	112025792	plus	3
LOC5564753	377.007	2.29385	0.384181	5.97074	2.36e-09	5.32e-08	LOC5564753	AaeL_AAEL006811, AAEL006811, CYP9J8	probable cytochrome P450 9f2	probable cytochrome P450 9f2		3	NC_035109.1	368477849	368521442	plus	3
LOC5571040	379.86	-1.73609	0.290796	-5.97011	2.37e-09	5.33e-08	LOC5571040	AaeL_AAEL008766, AAEL008766	uncharacterized LOC5571040	uncharacterized protein LOC5571040|proline rich salivary secreted peptide		2	NC_035108.1	158373828	158374941	plus	3
LOC5574713	977.471	-0.803821	0.134669	-5.96885	2.39e-09	5.37e-08	LOC5574713	AaeL_AAEL011355, AAEL011355	carnitine O-acetyltransferase	carnitine O-acetyltransferase		1	NC_035107.1	16472475	16475021	minus	4
LOC5571916	232.473	1.1373	0.190627	5.96608	2.43e-09	5.45e-08	LOC5571916	AaeL_AAEL009404, AAEL009404	putative helicase MOV-10	putative helicase MOV-10		3	NC_035109.1	380464905	380491021	plus	6
LOC5569299	35.748	4.80089	0.805021	5.96368	2.47e-09	5.52e-08	LOC5569299	AaeL_AAEL007543, AAEL007543	uncharacterized LOC5569299	uncharacterized protein LOC5569299		3	NC_035109.1	100370926	100371732	minus	2
LOC5576360	7162.29	-0.609615	0.102334	-5.95712	2.57e-09	5.74e-08	LOC5576360	AaeL_AAEL002860, AAEL002860	mitochondrial pyruvate carrier 1	mitochondrial pyruvate carrier 1		1	NC_035107.1	255365567	255373634	plus	3
LOC5564312	480.406	-1.07516	0.180522	-5.95584	2.59e-09	5.77e-08	LOC5564312	AaeL_AAEL000593, AAEL000593	mitochondrial fission process protein 1	mitochondrial fission process protein 1		3	NC_035109.1	11890433	11892826	minus	3
LOC5566442	2452.48	1.05317	0.176844	5.95535	2.6e-09	5.78e-08	LOC5566442	AaeL_AAEL005384, AAEL005384	phosphoribosylformylglycinamidine synthase	phosphoribosylformylglycinamidine synthase		3	NC_035109.1	235711305	235733170	minus	5
LOC5566478	1966.55	-0.661361	0.111175	-5.94885	2.7e-09	6.01e-08	LOC5566478	AaeL_AAEL005411, AAEL005411	equilibrative nucleoside transporter 1	equilibrative nucleoside transporter 1		1	NC_035107.1	246481737	246578319	plus	10
LOC5575147	330.27	-0.895625	0.15075	-5.94111	2.83e-09	6.29e-08	LOC5575147	AaeL_AAEL000332, AAEL000332	mitochondrial inner membrane protease ATP23 homolog	mitochondrial inner membrane protease ATP23 homolog		2	NC_035108.1	369722154	369724479	plus	3
LOC5575301	1081.73	-0.711226	0.119728	-5.94034	2.84e-09	6.31e-08	LOC5575301	AAEL002581, AAEL002620	methionine-R-sulfoxide reductase B1	methionine-R-sulfoxide reductase B1		3	NC_035109.1	121699906	121740373	minus	5
LOC5568550	3710.39	0.878365	0.147897	5.93903	2.87e-09	6.35e-08	LOC5568550		peritrophin-1	peritrophin-1		2	NC_035108.1	113657006	113658070	minus	2
LOC5580129	6872.84	-0.601226	0.101383	-5.93022	3.03e-09	6.69e-08	LOC5580129	AaeL_AAEL002436, AAEL002436	trimeric intracellular cation channel type 1B.1	trimeric intracellular cation channel type 1B.1		1	NC_035107.1	98885158	98919297	minus	7
LOC5571144	689.555	0.86508	0.145888	5.92975	3.03e-09	6.7e-08	LOC5571144	AaeL_AAEL008841, AAEL008841	peroxisomal acyl-coenzyme A oxidase 3	peroxisomal acyl-coenzyme A oxidase 3		2	NC_035108.1	240894485	240908339	plus	7
LOC5572780	2102.8	-0.75923	0.128042	-5.92952	3.04e-09	6.7e-08	LOC5572780	AaeL_AAEL010051, AAEL010051	protein TBRG4	protein TBRG4		1	NC_035107.1	159568836	159592003	plus	6
LOC5577039	463.097	-0.992885	0.167466	-5.92888	3.05e-09	6.71e-08	LOC5577039	AaeL_AAEL012955, AAEL012955	protein D3	protein D3		1	NC_035107.1	239391009	239392543	plus	3
LOC5566871	589.051	0.874507	0.147527	5.92778	3.07e-09	6.75e-08	LOC5566871	AaeL_AAEL000845, AAEL000845	phosphatidylinositol phosphatase PTPRQ	phosphatidylinositol phosphatase PTPRQ		3	NC_035109.1	363551303	363581993	minus	14
LOC5573927	8827.41	1.24997	0.2109	5.92682	3.09e-09	6.78e-08	LOC5573927	AaeL_AAEL002228, AAEL002228	fatty acid synthase	fatty acid synthase		2	NC_035108.1	429228612	429236010	minus	6
LOC110675656	316.755	-1.08004	0.182289	-5.92485	3.13e-09	6.85e-08	LOC110675656		epidermal growth factor-like protein 7	epidermal growth factor-like protein 7		2	NC_035108.1	74416768	74510464	minus	9
LOC5580213	174.537	-1.93704	0.327189	-5.92025	3.21e-09	7.03e-08	LOC5580213	AaeL_AAEL011923, AAEL011923	F-box/LRR-repeat protein 7	F-box/LRR-repeat protein 7		3	NC_035109.1	350912882	350915210	plus	4
LOC5572674	1046.96	-1.42461	0.240674	-5.91923	3.23e-09	7.07e-08	LOC5572674	AaeL_AAEL009951, AAEL009951	trans-1,2-dihydrobenzene-1,2-diol dehydrogenase	trans-1,2-dihydrobenzene-1,2-diol dehydrogenase		2	NC_035108.1	379684833	379686389	minus	3
LOC5575841	5841.12	-0.847623	0.143303	-5.91489	3.32e-09	7.24e-08	LOC5575841	AaeL_AAEL012114, AAEL012114	troponin C	troponin C		2	NC_035108.1	405582850	405642649	plus	5
LOC5575223	30241.6	-0.537695	0.0909257	-5.91356	3.35e-09	7.29e-08	LOC5575223	AaeL_AAEL010608, AAEL010608	succinate dehydrogenase [ubiquinone] flavoprotein subunit, mitochondrial	succinate dehydrogenase [ubiquinone] flavoprotein subunit, mitochondrial		3	NC_035109.1	291643095	291659300	plus	4
LOC5571179	308.26	1.14324	0.193506	5.90802	3.46e-09	7.53e-08	LOC5571179	AaeL_AAEL008857, AAEL008857	uncharacterized LOC5571179	uncharacterized protein LOC5571179		3	NC_035109.1	236610049	236631394	minus	5
LOC5572213	2992.86	1.23447	0.208966	5.9075	3.47e-09	7.54e-08	LOC5572213	AaeL_AAEL009629, AAEL009629	poly(U)-specific endoribonuclease homolog	poly(U)-specific endoribonuclease homolog		3	NC_035109.1	36648951	36669638	plus	4
LOC5572449	4606.61	-1.17352	0.198664	-5.90706	3.48e-09	7.55e-08	LOC5572449	AaeL_AAEL001818, AAEL001818	putative ankyrin repeat protein RF_0381	uncharacterized protein LOC5572449		2	NC_035108.1	375286038	375305136	plus	7
LOC5567655	143.835	-1.62858	0.275959	-5.90154	3.6e-09	7.8e-08	LOC5567655		uncharacterized LOC5567655			2	NC_035108.1	242853063	242854640	plus	2
LOC110673978	7676.83	-0.92408	0.156741	-5.89559	3.73e-09	8.07e-08	LOC110673978	AAEL006000	cytochrome c oxidase subunit 7A1, mitochondrial-like	cytochrome c oxidase subunit 7A1, mitochondrial-like		2	NC_035108.1	472327700	472328389	minus	4
LOC5567218	249.299	1.05772	0.179472	5.8935	3.78e-09	8.16e-08	LOC5567218	AaeL_AAEL000905, AAEL000905	glutactin	glutactin		3	NC_035109.1	332957571	332959714	minus	4
LOC5575133	766.958	0.903779	0.153405	5.89146	3.83e-09	8.25e-08	LOC5575133	AaeL_AAEL000314, AAEL000314	uncharacterized oxidoreductase YjmC	uncharacterized protein LOC5575133		2	NC_035108.1	124242756	124284005	plus	7
LOC5577601	14834.4	-0.920441	0.156277	-5.88979	3.87e-09	8.32e-08	LOC5577601	AaeL_AAEL003235, AAEL003235	larval cuticle protein LCP-30	larval cuticle protein LCP-30		2	NC_035108.1	366397245	366398359	plus	3
LOC5573159	86.4321	-2.3075	0.391861	-5.88857	3.9e-09	8.37e-08	LOC5573159	AaeL_AAEL001988, AAEL001988	ejaculatory bulb-specific protein 3	ejaculatory bulb-specific protein 3		2	NC_035108.1	426181495	426182286	plus	2
LOC5570690	49.0798	-2.98261	0.506732	-5.88598	3.96e-09	8.49e-08	LOC5570690	AaeL_AAEL008498, AAEL008498	coiled-coil domain-containing protein 40	coiled-coil domain-containing protein 40		2	NC_035108.1	395244350	395254316	plus	6
LOC5573283	77.0665	-2.17585	0.369712	-5.88525	3.97e-09	8.51e-08	LOC5573283	AaeL_AAEL010369, AAEL010369	phospholipase B1, membrane-associated	phospholipase B1, membrane-associated		2	NC_035108.1	182391367	182451360	plus	5
LOC5572215	870.25	1.59864	0.271689	5.88408	4e-09	8.56e-08	LOC5572215	AaeL_AAEL009630, AAEL009630	high affinity cGMP-specific 3',5'-cyclic phosphodiesterase 9A	high affinity cGMP-specific 3',5'-cyclic phosphodiesterase 9A		3	NC_035109.1	36914970	37696597	minus	16
LOC110676837	21.8171	-3.30953	0.562675	-5.88179	4.06e-09	8.67e-08	LOC110676837		uncharacterized LOC110676837			2	NC_035108.1	347280000	347280844	minus	2
LOC5576801	3066.42	0.943379	0.160542	5.87623	4.2e-09	8.95e-08	LOC5576801	AaeL_AAEL012778, AAEL012778	aminopeptidase N	aminopeptidase N		1	NC_035107.1	290623368	290626855	plus	5
LOC5568360	527.137	-1.08337	0.184696	-5.86569	4.47e-09	9.52e-08	LOC5568360	AaeL_AAEL001068, AAEL001068	myosin regulatory light chain, striated adductor muscle	myosin regulatory light chain, striated adductor muscle		1	NC_035107.1	299659286	299678129	minus	3
LOC5565885	283.232	-1.23006	0.209781	-5.86354	4.53e-09	9.63e-08	LOC5565885	AaeL_AAEL000700, AAEL000700, AAEL000717	protein dachsous	protein dachsous		2	NC_035108.1	459745241	460155140	minus	13
LOC5564950	216.443	2.21678	0.378383	5.85856	4.67e-09	9.91e-08	LOC5564950	AaeL_AAEL014662, AAEL014662	acyl-CoA synthetase family member 2, mitochondrial	acyl-CoA synthetase family member 2, mitochondrial		2	NC_035108.1	347596959	347599310	plus	6
LOC5577670	126.75	-1.42426	0.243688	-5.84458	5.08e-09	1.08e-07	LOC5577670		uncharacterized LOC5577670			1	NC_035107.1	155980905	155990837	plus	3
LOC110680470	197.596	-1.13785	0.1949	-5.83812	5.28e-09	1.12e-07	LOC110680470		uncharacterized LOC110680470			Un	NW_018734898.1	90836	128940	minus	2
LOC5573431	12873.7	-0.927915	0.159059	-5.83379	5.42e-09	1.15e-07	LOC5573431		facilitated trehalose transporter Tret1	facilitated trehalose transporter Tret1		1	NC_035107.1	278753543	278830714	plus	7
LOC110675608	61.2167	2.31312	0.396631	5.83192	5.48e-09	1.16e-07	LOC110675608		uncharacterized LOC110675608	uncharacterized protein LOC110675608		2	NC_035108.1	64512014	64512961	plus	4
LOC5567653	354.247	-0.958595	0.164372	-5.83185	5.48e-09	1.16e-07	LOC5567653	AaeL_AAEL006241, AAEL006241	organic cation transporter protein	organic cation transporter protein		2	NC_035108.1	242464938	242484820	plus	10
LOC5571038	118.343	-1.35774	0.233002	-5.82715	5.64e-09	1.19e-07	LOC5571038	AaeL_AAEL008782, AAEL008782	chymotrypsin-1	chymotrypsin-1		2	NC_035108.1	158329507	158330485	minus	2
LOC5578307	800.232	1.87668	0.322394	5.82108	5.85e-09	1.23e-07	LOC5578307	AaeL_AAEL013628, AAEL013628	trypsin alpha-3	trypsin alpha-3|serine protease III		1	NC_035107.1	61847464	61857631	plus	3
LOC5568694	684.251	1.31991	0.226811	5.81942	5.91e-09	1.24e-07	LOC5568694	AaeL_AAEL007046, AAEL007046	mitochondrial uncoupling protein 2	mitochondrial uncoupling protein 2		3	NC_035109.1	298598122	298627874	plus	4
LOC5578720	409.822	1.4531	0.250053	5.81117	6.2e-09	1.3e-07	LOC5578720	AaeL_AAEL013834, AAEL013834, AAEL015067, AAEL015290	probable multidrug resistance-associated protein lethal(2)03659	probable multidrug resistance-associated protein lethal(2)03659		1	NC_035107.1	284737104	284863028	plus	13
LOC5569439	531.756	-1.12735	0.194061	-5.80927	6.27e-09	1.31e-07	LOC5569439	AaeL_AAEL001233, AAEL001233, CLIPE9	uncharacterized LOC5569439	uncharacterized protein LOC5569439		2	NC_035108.1	372264358	372292559	minus	12
LOC5578692	2201.74	0.747251	0.128635	5.80909	6.28e-09	1.31e-07	LOC5578692	AaeL_AAEL003625, AAEL003625, CLIPB8	serine protease easter	serine protease easter|clip-domain serine protease		1	NC_035107.1	188901545	188918931	plus	6
LOC5570644	916.432	1.02001	0.17563	5.80769	6.33e-09	1.32e-07	LOC5570644	AaeL_AAEL008452, AAEL008452	alpha-amylase A	alpha-amylase A		1	NC_035107.1	171511085	171513448	plus	2
LOC5577564	63.2176	-2.66062	0.458193	-5.80677	6.37e-09	1.33e-07	LOC5577564	AaeL_AAEL013276, AAEL013276	testicular acid phosphatase homolog	testicular acid phosphatase homolog		2	NC_035108.1	349618003	349619728	minus	3
LOC5576251	3789.14	1.11401	0.191867	5.80619	6.39e-09	1.33e-07	LOC5576251	AaeL_AAEL012409, AAEL012409	pantothenate kinase 3	pantothenate kinase 3		3	NC_035109.1	290484013	290599511	minus	9
LOC5577244	586.587	-0.767179	0.13218	-5.80407	6.47e-09	1.34e-07	LOC5577244	AaeL_AAEL003142, AAEL003142	39S ribosomal protein L21, mitochondrial	39S ribosomal protein L21, mitochondrial		3	NC_035109.1	269566803	269567706	minus	2
LOC110680956	79.6288	-1.73065	0.298362	-5.80049	6.61e-09	1.37e-07	LOC110680956		nose resistant to fluoxetine protein 6-like	nose resistant to fluoxetine protein 6-like		Un	NW_018735699.1	2422	10312	plus	8
LOC5566289	1239.99	1.0179	0.175489	5.80035	6.62e-09	1.37e-07	LOC5566289	S6K	ribosomal protein S6 kinase beta-2	ribosomal protein S6 kinase beta-2|uncharacterized protein LOC5566289|S6 kinase		2	NC_035108.1	55713249	55875670	minus	16
LOC5578154	388.619	0.906683	0.156548	5.79171	6.97e-09	1.44e-07	LOC5578154	AaeL_AAEL013532, AAEL013532	uncharacterized LOC5578154	uncharacterized protein LOC5578154|salivary secreted protein		2	NC_035108.1	246175348	246179475	plus	7
LOC5572603	861.099	1.10939	0.191585	5.79057	7.01e-09	1.45e-07	LOC5572603	AaeL_AAEL009927, AAEL009927	uncharacterized LOC5572603	uncharacterized protein LOC5572603		1	NC_035107.1	307655561	307659118	minus	3
LOC5564737	226.308	-1.20345	0.207865	-5.78959	7.06e-09	1.46e-07	LOC5564737	AaeL_AAEL014594, AAEL014594, CYP301A1	probable cytochrome P450 301a1, mitochondrial	probable cytochrome P450 301a1, mitochondrial		2	NC_035108.1	109530033	109626224	plus	8
LOC5563984	383.103	-0.791881	0.136859	-5.78613	7.2e-09	1.48e-07	LOC5563984	AaeL_AAEL004034, AAEL004034	probable 28S ribosomal protein S6, mitochondrial	probable 28S ribosomal protein S6, mitochondrial		3	NC_035109.1	166151635	166152322	minus	2
LOC5579998	391.194	1.57079	0.271685	5.78165	7.4e-09	1.52e-07	LOC5579998	AaeL_AAEL001747, AAEL001747	fatty acyl-CoA reductase wat	fatty acyl-CoA reductase wat		2	NC_035108.1	39839451	39841500	minus	4
LOC5571163	21.897	-8.01952	1.38714	-5.78135	7.41e-09	1.52e-07	LOC5571163	AaeL_AAEL008861, AAEL008861	uncharacterized LOC5571163	uncharacterized protein LOC5571163		3	NC_035109.1	236574296	236578860	plus	3
LOC5567927	3620.13	1.08928	0.188458	5.77996	7.47e-09	1.53e-07	LOC5567927	AaeL_AAEL006372, AAEL006372, AAEL015249	sodium-independent sulfate anion transporter	sodium-independent sulfate anion transporter		1	NC_035107.1	100840814	100904156	minus	7
LOC23687559	741.243	-1.47159	0.25468	-5.77818	7.55e-09	1.55e-07	LOC23687559	AaeL_AAEL017139, AAEL017139	uncharacterized LOC23687559	uncharacterized protein LOC23687559		1	NC_035107.1	107666318	107667276	plus	1
LOC5575717	710.074	-0.808414	0.139941	-5.77683	7.61e-09	1.56e-07	LOC5575717	AaeL_AAEL012025, AAEL012025	probable 39S ribosomal protein L45, mitochondrial	probable 39S ribosomal protein L45, mitochondrial		3	NC_035109.1	147297589	147298844	minus	2
LOC110681235	2890.09	-0.599956	0.103921	-5.77318	7.78e-09	1.59e-07	LOC110681235		S-adenosylmethionine decarboxylase proenzyme-like	S-adenosylmethionine decarboxylase proenzyme-like		Un	NW_018736277.1	13936	18433	plus	3
LOC5570137	6019.86	-1.43812	0.249135	-5.77244	7.81e-09	1.59e-07	LOC5570137	AaeL_AAEL008102, AAEL008102	kelch-like protein 5	kelch-like protein 5		3	NC_035109.1	14626556	14664871	plus	10
LOC5567701	313.408	-0.939145	0.162905	-5.765	8.17e-09	1.66e-07	LOC5567701	AaeL_AAEL006262, AAEL006262	solute carrier family 25 member 35	solute carrier family 25 member 35		2	NC_035108.1	221098747	221115911	plus	3
LOC5572052	108.471	1.36639	0.237286	5.7584	8.49e-09	1.73e-07	LOC5572052	AaeL_AAEL001724, AAEL001724, GPRNNB3	G-protein coupled receptor 143	G-protein coupled receptor 143		2	NC_035108.1	441822776	441836769	minus	6
LOC5578716	85.9636	-1.84136	0.319841	-5.75713	8.56e-09	1.74e-07	LOC5578716	AaeL_AAEL013829, AAEL013829	larval cuticle protein A2B	larval cuticle protein A2B		2	NC_035108.1	315812707	315855748	plus	4
LOC5579053	522.662	-0.885557	0.153885	-5.75467	8.68e-09	1.76e-07	LOC5579053	AaeL_AAEL013994, AAEL013994	ubiquitin thioesterase OTU1	ubiquitin thioesterase OTU1		2	NC_035108.1	102055175	102080283	plus	3
LOC5574159	850.368	-0.658254	0.11439	-5.75445	8.69e-09	1.76e-07	LOC5574159	AaeL_AAEL010966, AAEL010966	ubiquitin carboxyl-terminal hydrolase isozyme L5	ubiquitin carboxyl-terminal hydrolase isozyme L5		2	NC_035108.1	151224136	151225555	minus	3
LOC5572883	3185.57	-1.11707	0.194136	-5.7541	8.71e-09	1.76e-07	LOC5572883	AaeL_AAEL010108, AAEL010108	protein fem-1 homolog B	protein fem-1 homolog B		2	NC_035108.1	35705401	35731918	minus	6
LOC5575209	239.502	1.28981	0.224255	5.75156	8.84e-09	1.78e-07	LOC5575209	AaeL_AAEL014664, AAEL014663, AAEL014664	acyl-CoA synthetase family member 2, mitochondrial	acyl-CoA synthetase family member 2, mitochondrial		2	NC_035108.1	347629209	347644549	minus	8
LOC5564470	92.0072	1.57641	0.274354	5.74588	9.14e-09	1.84e-07	LOC5564470	AaeL_AAEL014454, AAEL014454	uncharacterized LOC5564470	uncharacterized protein LOC5564470		2	NC_035108.1	118901511	118902414	minus	4
LOC110675590	247.157	-1.71097	0.297936	-5.74276	9.31e-09	1.88e-07	LOC110675590		uncharacterized LOC110675590			1	NC_035107.1	81465065	81465684	minus	3
LOC5568409	149.892	-1.81638	0.316362	-5.74146	9.39e-09	1.89e-07	LOC5568409	AaeL_AAEL006826, AAEL006826	uncharacterized LOC5568409	uncharacterized protein LOC5568409		1	NC_035107.1	53084688	53112098	plus	6
LOC5564124	542.208	-0.983996	0.171565	-5.73541	9.73e-09	1.95e-07	LOC5564124	AaeL_AAEL004086, AAEL004086	1,5-anhydro-D-fructose reductase	1,5-anhydro-D-fructose reductase		3	NC_035109.1	401735271	401736742	minus	3
LOC5566906	618.252	-1.69092	0.29499	-5.73213	9.92e-09	1.99e-07	LOC5566906	AaeL_AAEL000817, AAEL000817	inactive rhomboid protein 1	inactive rhomboid protein 1		3	NC_035109.1	120052795	120092569	plus	7
LOC5578801	3122.11	0.629885	0.109994	5.72654	1.02e-08	2.05e-07	LOC5578801	AaeL_AAEL003646, AAEL003646	probable basic-leucine zipper transcription factor J	probable basic-leucine zipper transcription factor J		3	NC_035109.1	65607165	65684128	plus	6
LOC5565659	19.4608	-4.11165	0.718055	-5.72609	1.03e-08	2.05e-07	LOC5565659	AaeL_AAEL004903, AAEL004903	uncharacterized LOC5565659	uncharacterized protein LOC5565659		2	NC_035108.1	99924418	99940771	minus	3
LOC5565119	294.079	1.00043	0.174732	5.72551	1.03e-08	2.06e-07	LOC5565119	AaeL_AAEL014735, AAEL014735, AAEL801138	dnaJ homolog subfamily C member 28	dnaJ homolog subfamily C member 28		2	NC_035108.1	326739480	326754137	minus	3
LOC110679592	78.6448	1.46399	0.255823	5.72267	1.05e-08	2.09e-07	LOC110679592	AaeL_AAEL000658, AAEL000658	uncharacterized LOC110679592	uncharacterized protein LOC110679592		3	NC_035109.1	395035919	395037975	plus	4
LOC5569553	665.197	0.769539	0.134513	5.72092	1.06e-08	2.11e-07	LOC5569553	AaeL_AAEL007758, AAEL007758	transmembrane protein 205	transmembrane protein 205		1	NC_035107.1	71027843	71030320	minus	2
LOC5568780	486.926	0.882995	0.154359	5.72038	1.06e-08	2.11e-07	LOC5568780	AaeL_AAEL007136, AAEL007136	facilitated trehalose transporter Tret1	facilitated trehalose transporter Tret1		2	NC_035108.1	266895414	267053546	minus	7
LOC5572439	66.6815	-2.52766	0.442191	-5.71621	1.09e-08	2.16e-07	LOC5572439	AaeL_AAEL001822, AAEL001822	UDP-glucuronosyltransferase 2B7	UDP-glucuronosyltransferase 2B7		2	NC_035108.1	374871931	374873949	plus	2
LOC5570883	890.176	1.05972	0.185453	5.71425	1.1e-08	2.18e-07	LOC5570883	AaeL_AAEL008658, AAEL008658	chaoptin	chaoptin		3	NC_035109.1	171988574	172016575	plus	2
LOC5569644	212.906	1.15779	0.202695	5.71198	1.12e-08	2.21e-07	LOC5569644	AaeL_AAEL007792, AAEL007792	uncharacterized LOC5569644	uncharacterized protein LOC5569644		1	NC_035107.1	268961077	268963200	plus	2
LOC5566990	267890	-0.806194	0.141264	-5.70699	1.15e-08	2.27e-07	LOC5566990		myosin heavy chain, muscle	LOW QUALITY PROTEIN: myosin heavy chain, muscle		2	NC_035108.1	293814081	293834545	minus	16
LOC5564711	59.8452	-1.88836	0.330885	-5.70699	1.15e-08	2.27e-07	LOC5564711		serine protease 55	serine protease 55		2	NC_035108.1	344264654	344273823	plus	3
LOC5573878	252.864	0.96208	0.168659	5.70431	1.17e-08	2.3e-07	LOC5573878	AaeL_AAEL010799, AAEL010799	uncharacterized LOC5573878	uncharacterized protein LOC5573878		3	NC_035109.1	156834783	156835720	minus	3
LOC5571208	1240.22	0.759972	0.133256	5.7031	1.18e-08	2.32e-07	LOC5571208	AaeL_AAEL008893, AAEL008893	xaa-Pro dipeptidase	xaa-Pro dipeptidase		3	NC_035109.1	337232944	337598644	minus	11
LOC5576871	1933.71	-1.09207	0.191655	-5.69811	1.21e-08	2.38e-07	LOC5576871	AaeL_AAEL003027, AAEL003027	tyrosine-protein phosphatase non-receptor type 23	tyrosine-protein phosphatase non-receptor type 23		1	NC_035107.1	131450673	131497719	plus	5
LOC5572507	119.109	2.24671	0.394294	5.69806	1.21e-08	2.38e-07	LOC5572507	AaeL_AAEL009843, AAEL009843	trypsin-1	trypsin-1		3	NC_035109.1	18948275	18949411	plus	2
LOC5567539	117.373	-1.53184	0.269048	-5.69356	1.24e-08	2.44e-07	LOC5567539	AaeL_AAEL006154, AAEL006154	uncharacterized LOC5567539	uncharacterized protein LOC5567539		3	NC_035109.1	69450363	69543139	plus	4
LOC5565307	4089.14	-0.645871	0.113454	-5.69282	1.25e-08	2.45e-07	LOC5565307	AaeL_AAEL004716, AAEL004716	chromodomain-helicase-DNA-binding protein 1	chromodomain-helicase-DNA-binding protein 1		2	NC_035108.1	378119154	378147140	minus	7
LOC5574118	68.5122	2.86717	0.503837	5.69068	1.27e-08	2.47e-07	LOC5574118	AaeL_AAEL010919, AAEL010919	phenoloxidase 2	phenoloxidase 2		2	NC_035108.1	139123285	139126620	minus	6
LOC5577476	51.2945	2.03251	0.357349	5.68774	1.29e-08	2.51e-07	LOC5577476	AaeL_AAEL013218, AAEL013218	thiamine transporter 1	thiamine transporter 1		3	NC_035109.1	340947942	340981691	minus	2
LOC5579926	188.846	1.04239	0.183542	5.67931	1.35e-08	2.64e-07	LOC5579926	AaeL_AAEL006795, AAEL006795, CYP9J15	cytochrome P450 9e2	cytochrome P450 9e2		3	NC_035109.1	368428196	368430478	plus	3
LOC5567893	152.091	-1.05031	0.185204	-5.67108	1.42e-08	2.76e-07	LOC5567893	AaeL_AAEL006338, AAEL006338	sulfotransferase family cytosolic 1B member 1	sulfotransferase family cytosolic 1B member 1		3	NC_035109.1	396822929	396824212	minus	4
LOC5572766	486.163	-0.824585	0.145455	-5.66899	1.44e-08	2.79e-07	LOC5572766	AaeL_AAEL010023, AAEL010023	mitochondrial thiamine pyrophosphate carrier	mitochondrial thiamine pyrophosphate carrier		2	NC_035108.1	111167216	111202765	minus	5
LOC5564748	520.681	1.68657	0.29758	5.6676	1.45e-08	2.81e-07	LOC5564748	AaeL_AAEL014619, AAEL014619	probable cytochrome P450 9f2	probable cytochrome P450 9f2		3	NC_035109.1	368545751	368547547	plus	2
LOC5578608	2386.83	-0.556402	0.0982143	-5.66519	1.47e-08	2.85e-07	LOC5578608	AaeL_AAEL014738, AAEL003579, AAEL014738	FAS-associated factor 1	FAS-associated factor 1		2	NC_035108.1	126141017	126171947	minus	14
LOC5576932	537.067	1.31478	0.232239	5.66132	1.5e-08	2.91e-07	LOC5576932	AaeL_AAEL012882, AAEL012882	folylpolyglutamate synthase, mitochondrial	folylpolyglutamate synthase, mitochondrial		3	NC_035109.1	275836619	275853337	minus	5
LOC110676221	84.9786	2.23479	0.394818	5.66031	1.51e-08	2.92e-07	LOC110676221		uncharacterized LOC110676221	uncharacterized protein LOC110676221		1	NC_035107.1	97530314	97531144	plus	2
LOC5570034	386.003	-0.945472	0.167063	-5.65938	1.52e-08	2.93e-07	LOC5570034	AaeL_AAEL000168, AAEL000168, AAEL000205	somatomedin-B and thrombospondin type-1 domain-containing protein	somatomedin-B and thrombospondin type-1 domain-containing protein		3	NC_035109.1	214822187	215076608	minus	7
LOC110676499	74.615	1.75412	0.310066	5.65724	1.54e-08	2.97e-07	LOC110676499		uncharacterized LOC110676499			2	NC_035108.1	241371040	241387770	plus	2
LOC23687442	14530.9	0.86871	0.153559	5.65716	1.54e-08	2.97e-07	LOC23687442	AaeL_AAEL017022, AAEL017022	cell wall protein DAN4	cell wall protein DAN4		3	NC_035109.1	18623727	18625030	plus	2
LOC5576905	208.541	1.72534	0.305033	5.65623	1.55e-08	2.98e-07	LOC5576905	AaeL_AAEL012855, AAEL012855	uncharacterized LOC5576905	uncharacterized protein LOC5576905		3	NC_035109.1	339263397	339264528	plus	1
LOC5568132	41629.6	-0.753758	0.133293	-5.65488	1.56e-08	3e-07	LOC5568132	AaeL_AAEL006572, AAEL006572	troponin C	troponin C		2	NC_035108.1	133262218	133319128	plus	6
LOC5564193	1769.97	-1.12271	0.198607	-5.6529	1.58e-08	3.03e-07	LOC5564193	AaeL_AAEL014344, AAEL014344	zinc metalloproteinase-disintegrin-like EoMP06	zinc metalloproteinase-disintegrin-like EoMP06		1	NC_035107.1	279009117	279046474	plus	5
LOC110681094	129.925	1.95485	0.345869	5.65201	1.59e-08	3.04e-07	LOC110681094		uncharacterized LOC110681094			Un	NW_018736074.1	69301	120405	minus	3
LOC5567446	10403.2	0.960556	0.170066	5.64815	1.62e-08	3.1e-07	LOC5567446	AaeL_AAEL006096, AAEL006096	gelsolin	gelsolin		3	NC_035109.1	307409203	307418306	plus	3
LOC23687552	511.358	1.48283	0.262635	5.64597	1.64e-08	3.14e-07	LOC23687552	AaeL_AAEL017132, AAEL017132, LYSC4	lysozyme c-1	lysozyme c-1		2	NC_035108.1	35588182	35590420	minus	6
LOC5578116	515.556	-0.867356	0.153649	-5.64506	1.65e-08	3.15e-07	LOC5578116	AaeL_AAEL003409, AAEL003409	39S ribosomal protein L15, mitochondrial	39S ribosomal protein L15, mitochondrial		3	NC_035109.1	349859501	349860596	minus	2
LOC23687920	5498.38	-1.12999	0.200282	-5.64203	1.68e-08	3.2e-07	LOC23687920	AaeL_AAEL017500, AAEL017500	cuticle protein 12.5	cuticle protein 12.5		2	NC_035108.1	86103226	86115248	minus	3
LOC5578124	9822.67	-1.28264	0.227374	-5.6411	1.69e-08	3.22e-07	LOC5578124	AaeL_AAEL003419, AAEL003419	uncharacterized LOC5578124	uncharacterized protein LOC5578124		3	NC_035109.1	350343449	350395329	minus	5
LOC5570986	744.129	-0.65917	0.116921	-5.63774	1.72e-08	3.28e-07	LOC5570986	AaeL_AAEL008718, AAEL008718	solute carrier family 25 member 46	solute carrier family 25 member 46		3	NC_035109.1	189436128	189455709	minus	6
LOC5572532	11730.4	-0.643622	0.114173	-5.63728	1.73e-08	3.28e-07	LOC5572532	AaeL_AAEL009863, AAEL009863	protein I'm not dead yet	protein I'm not dead yet		2	NC_035108.1	164560718	164620845	minus	13
LOC5564575	688.051	1.57694	0.279883	5.63428	1.76e-08	3.33e-07	LOC5564575	AaeL_AAEL004341, AAEL004341	esterase B1	esterase B1		3	NC_035109.1	367368362	367370477	minus	2
LOC5571607	803.626	0.811469	0.144211	5.62697	1.83e-08	3.47e-07	LOC5571607	AaeL_AAEL009198, AAEL009197, AAEL009198	major facilitator superfamily domain-containing protein 8	major facilitator superfamily domain-containing protein 8		3	NC_035109.1	390998455	391040213	plus	9
LOC5566267	2553.45	-0.688605	0.122485	-5.62194	1.89e-08	3.57e-07	LOC5566267	AaeL_AAEL000744, AAEL000744	troponin C	troponin C		2	NC_035108.1	55357958	55384996	plus	5
LOC5574714	511.799	1.15397	0.205492	5.61563	1.96e-08	3.7e-07	LOC5574714	AaeL_AAEL011359, AAEL011359	nuclear factor of activated T-cells 5	nuclear factor of activated T-cells 5		1	NC_035107.1	16014384	16443984	plus	12
LOC110674731	3459.76	1.41169	0.251459	5.61397	1.98e-08	3.73e-07	LOC110674731		serine protease snake-like	serine protease snake-like		1	NC_035107.1	8348256	8352706	minus	6
LOC5572301	799.741	-1.4975	0.266769	-5.61345	1.98e-08	3.74e-07	LOC5572301	AaeL_AAEL001766, AAEL001766	chaoptin	chaoptin		2	NC_035108.1	165273670	165277942	minus	3
LOC5580010	4202.81	1.84834	0.32957	5.60834	2.04e-08	3.84e-07	LOC5580010	AaeL_AAEL009637, AAEL009637, CAT-B3	cathepsin B	cathepsin B|lysosomal cathepsin B		1	NC_035107.1	222688084	222704648	plus	2
LOC5570396	1573.33	-0.735132	0.131154	-5.60509	2.08e-08	3.91e-07	LOC5570396	AaeL_AAEL008291, AAEL008291	thioredoxin-like protein 1	thioredoxin-like protein 1		2	NC_035108.1	67240086	67242113	minus	4
LOC5573848	803.728	1.32394	0.236227	5.60452	2.09e-08	3.92e-07	LOC5573848	AaeL_AAEL010773, AAEL010773, CLIPE10	transmembrane protease serine 9	transmembrane protease serine 9		2	NC_035108.1	305495966	305520024	minus	6
LOC5566037	266.076	1.34736	0.240487	5.60264	2.11e-08	3.96e-07	LOC5566037	AaeL_AAEL015051, AAEL015051	myrosinase 1	myrosinase 1		1	NC_035107.1	115959020	115962380	plus	3
LOC5565336	885.803	2.15381	0.384928	5.59535	2.2e-08	4.12e-07	LOC5565336	AaeL_AAEL013555, AAEL013555, CYP4J13	probable cytochrome P450 4ac1	probable cytochrome P450 4ac1		2	NC_035108.1	57985939	57987769	plus	4
LOC5579187	22800.2	0.66925	0.119803	5.58624	2.32e-08	4.34e-07	LOC5579187	AaeL_AAEL003873, AAEL003873	glycerol-3-phosphate dehydrogenase, mitochondrial	glycerol-3-phosphate dehydrogenase, mitochondrial		3	NC_035109.1	85191823	85266305	plus	10
LOC5572634	25440.7	3.32728	0.59566	5.58586	2.33e-08	4.34e-07	LOC5572634	AaeL_AAEL001863, AAEL001863, CPB-I	carboxypeptidase B	carboxypeptidase B		2	NC_035108.1	184431863	184433353	plus	3
LOC5575811	1146.65	-1.54547	0.27673	-5.58477	2.34e-08	4.36e-07	LOC5575811	AaeL_AAEL012082, AAEL012082	mediator of RNA polymerase II transcription subunit 15	mediator of RNA polymerase II transcription subunit 15		3	NC_035109.1	160709199	160774878	plus	4
LOC110678983	1773.08	1.17439	0.21045	5.58036	2.4e-08	4.47e-07	LOC110678983		5'-nucleotidase domain-containing protein 1	5'-nucleotidase domain-containing protein 1		3	NC_035109.1	153178281	153201097	plus	2
LOC5572656	451.201	-1.40281	0.251529	-5.5771	2.45e-08	4.55e-07	LOC5572656	AaeL_AAEL001878, AAEL001878	pancreatic triacylglycerol lipase	pancreatic triacylglycerol lipase		2	NC_035108.1	275800558	275868178	plus	5
LOC5567009	37.7344	3.24132	0.58122	5.57675	2.45e-08	4.55e-07	LOC5567009	AaeL_AAEL005752, AAEL005752	lysosomal alpha-mannosidase	lysosomal alpha-mannosidase		2	NC_035108.1	436115747	436131556	plus	6
LOC110675253	209.688	-1.27193	0.228085	-5.57656	2.45e-08	4.55e-07	LOC110675253		cadherin-related tumor suppressor	cadherin-related tumor suppressor		2	NC_035108.1	468120977	468279157	minus	8
LOC5564672	829.222	1.31899	0.236901	5.56769	2.58e-08	4.78e-07	LOC5564672	AaeL_AAEL014556, AAEL014556	2-oxo-4-hydroxy-4-carboxy-5-ureidoimidazoline decarboxylase	2-oxo-4-hydroxy-4-carboxy-5-ureidoimidazoline decarboxylase		2	NC_035108.1	332338560	332339792	plus	3
LOC5574363	1752.04	-0.609318	0.109477	-5.56572	2.61e-08	4.83e-07	LOC5574363	AaeL_AAEL011081, AAEL011081, AAEL801156	HD domain-containing protein 2	HD domain-containing protein 2		2	NC_035108.1	235607736	235619965	plus	5
LOC5577491	604.181	0.922449	0.165759	5.56501	2.62e-08	4.84e-07	LOC5577491	AaeL_AAEL013227, AAEL013227, PIWI6	protein aubergine	protein aubergine		3	NC_035109.1	279908444	279964670	minus	7
LOC5566116	1477.91	0.978045	0.175772	5.5643	2.63e-08	4.86e-07	LOC5566116	AaeL_AAEL005174, AAEL005174, AAEL005209	uncharacterized LOC5566116	uncharacterized protein LOC5566116		2	NC_035108.1	756852	969416	minus	25
LOC5565904	4067.8	0.648473	0.116596	5.56173	2.67e-08	4.92e-07	LOC5565904	AaeL_AAEL000702, AAEL000702, AAEL000718	uncharacterized LOC5565904	uncharacterized protein LOC5565904|putative salivary secreted mucin 3		2	NC_035108.1	455722330	455790748	plus	5
LOC5578921	383.256	1.46987	0.264317	5.561	2.68e-08	4.94e-07	LOC5578921	AaeL_AAEL003766, AAEL003766	uncharacterized LOC5578921	uncharacterized protein LOC5578921		1	NC_035107.1	249118235	249121748	plus	3
LOC5576118	2749.64	-0.756467	0.136105	-5.55795	2.73e-08	5.02e-07	LOC5576118	AaeL_AAEL002817, AAEL002817	uncharacterized protein KIAA1683 homolog	uncharacterized protein KIAA1683 homolog		1	NC_035107.1	304806213	304807645	minus	1
LOC5573074	3330.65	-0.863382	0.155458	-5.55381	2.8e-08	5.13e-07	LOC5573074	AaeL_AAEL006297, AAEL006297	venom allergen 5	venom allergen 5		2	NC_035108.1	360085043	360093964	minus	5
LOC5568072	3947.62	0.698381	0.125836	5.54992	2.86e-08	5.24e-07	LOC5568072	AaeL_AAEL006514, AAEL006514	sialin	sialin		2	NC_035108.1	469016607	469067540	plus	13
LOC5568765	1111.52	-0.780423	0.140761	-5.54431	2.95e-08	5.4e-07	LOC5568765		selenide, water dikinase 2	selenide, water dikinase 2		3	NC_035109.1	305711460	305713485	minus	4
LOC5573766	483.753	0.905099	0.163359	5.54056	3.02e-08	5.51e-07	LOC5573766		PAB-dependent poly(A)-specific ribonuclease subunit PAN3	PAB-dependent poly(A)-specific ribonuclease subunit PAN3		2	NC_035108.1	74655820	74756186	plus	16
LOC110677916	1112.74	-0.780488	0.140884	-5.53994	3.03e-08	5.53e-07	LOC110677916		selenide, water dikinase-like	selenide, water dikinase 2-like|selenide, water dikinase-like		3	NC_035109.1	305675021	305677048	plus	4
LOC110680797	703.451	-0.902123	0.162864	-5.53911	3.04e-08	5.54e-07	LOC110680797		carnitine O-acetyltransferase-like			Un	NW_018735344.1	60707	62764	minus	1
LOC5574353	1033.96	-1.46994	0.265376	-5.53907	3.04e-08	5.54e-07	LOC5574353	AaeL_AAEL002347, AAEL002347	chymotrypsin-1	chymotrypsin-1		2	NC_035108.1	175103786	175104826	minus	3
LOC5578359	353.165	-0.84957	0.153465	-5.5359	3.1e-08	5.63e-07	LOC5578359	AaeL_AAEL003527, AAEL003527	SET and MYND domain-containing protein 4	SET and MYND domain-containing protein 4		2	NC_035108.1	256835108	256844200	minus	6
LOC5571724	303.351	1.20899	0.218524	5.53253	3.16e-08	5.74e-07	LOC5571724	AaeL_AAEL009247, AAEL009247, AAEL009250	broad-complex core protein	broad-complex core protein isoforms 1/2/3/4/5|longitudinals lacking protein, isoforms H/M/V		1	NC_035107.1	35352379	35434452	plus	7
LOC5567918	167.962	-2.32126	0.419712	-5.53061	3.19e-08	5.79e-07	LOC5567918	AaeL_AAEL013717, AAEL013717	sphingomyelin phosphodiesterase	sphingomyelin phosphodiesterase		1	NC_035107.1	101124643	101126959	minus	4
LOC5571171	328.404	0.920176	0.166419	5.52927	3.22e-08	5.83e-07	LOC5571171		dynein beta chain, ciliary	dynein beta chain, ciliary		3	NC_035109.1	236854886	236922070	minus	31
LOC5575822	4905.66	0.628059	0.113596	5.52887	3.22e-08	5.83e-07	LOC5575822	AaeL_AAEL012092, AAEL012092	protein windpipe	protein windpipe		2	NC_035108.1	139729141	139823476	minus	4
LOC5564209	840.238	1.40658	0.254414	5.5287	3.23e-08	5.83e-07	LOC5564209	AaeL_AAEL014361, AAEL009925, AAEL014361	fatty-acid amide hydrolase 2	fatty-acid amide hydrolase 2		1	NC_035107.1	307721231	307771695	minus	5
LOC110675956	34.2048	-2.11134	0.381966	-5.52756	3.25e-08	5.86e-07	LOC110675956		uncharacterized LOC110675956			2	NC_035108.1	115460670	115462380	minus	3
LOC5566161	2281.08	-0.929151	0.168104	-5.52723	3.25e-08	5.87e-07	LOC5566161	AaeL_AAEL005224, AAEL005224	transmembrane protein 216	transmembrane protein 216		3	NC_035109.1	88904891	88910582	minus	4
LOC5565266	11377.4	0.596833	0.10803	5.52471	3.3e-08	5.94e-07	LOC5565266	AaeL_AAEL004699, AAEL004699	uncharacterized LOC5565266	uncharacterized protein LOC5565266		1	NC_035107.1	158960098	158981396	minus	5
LOC5578005	859.239	0.717004	0.129789	5.52438	3.31e-08	5.95e-07	LOC5578005	AaeL_AAEL003375, AAEL003375, AAEL003381	protein spartin	protein spartin		3	NC_035109.1	80969420	81002538	minus	3
LOC110675358	310.157	1.67295	0.303038	5.52059	3.38e-08	6.07e-07	LOC110675358		uncharacterized LOC110675358			2	NC_035108.1	17520012	17520788	plus	2
LOC5574840	840.684	-1.57737	0.285792	-5.51928	3.4e-08	6.11e-07	LOC5574840	AaeL_AAEL011449, AAEL011449	alpha-tocopherol transfer protein-like	alpha-tocopherol transfer protein-like		2	NC_035108.1	37031615	37057848	minus	2
LOC5567287	2589.73	1.07749	0.195577	5.50929	3.6e-08	6.46e-07	LOC5567287	AaeL_AAEL005951, AAEL005951, peripilin	lipid storage droplets surface-binding protein 1	lipid storage droplets surface-binding protein 1		1	NC_035107.1	257720146	257734201	plus	7
LOC5572679	41.0925	6.85434	1.24558	5.50294	3.74e-08	6.69e-07	LOC5572679	AaeL_AAEL009953, AAEL009953	uncharacterized LOC5572679	uncharacterized protein LOC5572679		1	NC_035107.1	303042722	303043355	plus	2
LOC5573216	506.185	-0.807085	0.146701	-5.50156	3.76e-08	6.73e-07	LOC5573216	AaeL_AAEL010321, AAEL010321	porphobilinogen deaminase	uncharacterized protein LOC5573216|hydroxymethylbilane synthase-like protein		3	NC_035109.1	409314549	409328447	minus	4
LOC5577934	130.383	1.18464	0.215419	5.49925	3.81e-08	6.81e-07	LOC5577934	AaeL_AAEL001608, AAEL001608	uncharacterized LOC5577934	uncharacterized protein LOC5577934		2	NC_035108.1	90143983	90169046	minus	5
LOC5573859	121.995	-2.42276	0.440783	-5.49648	3.87e-08	6.91e-07	LOC5573859	AaeL_AAEL010780, AAEL010780	zinc carboxypeptidase A 1	zinc carboxypeptidase A 1		2	NC_035108.1	304967416	304968971	plus	1
LOC5567871	599.178	1.68608	0.306813	5.49546	3.9e-08	6.94e-07	LOC5567871	AaeL_AAEL006351, AAEL006351	uncharacterized LOC5567871	uncharacterized protein LOC5567871		3	NC_035109.1	397760682	397761727	plus	2
LOC5578354	1244.47	0.963044	0.175325	5.4929	3.95e-08	7.02e-07	LOC5578354	AaeL_AAEL003508, AAEL003508, Ae-HKT/AGT, HKT	serine--pyruvate aminotransferase	serine--pyruvate aminotransferase|3-hydroxykynurenine transaminase|3-hydroxykynurenine transaminase and alanine--glyoxylate aminotransferase|Alanine--glyoxylate aminotransferase		3	NC_035109.1	330092166	330115756	plus	4
LOC110676188	9381.11	-0.83417	0.151865	-5.49284	3.96e-08	7.02e-07	LOC110676188		uncharacterized LOC110676188	uncharacterized protein LOC110676188		2	NC_035108.1	168658592	168659049	plus	1
LOC5578763	467.236	-0.779601	0.141937	-5.49257	3.96e-08	7.02e-07	LOC5578763	AaeL_AAEL003704, AAEL003704	39S ribosomal protein L13, mitochondrial	39S ribosomal protein L13, mitochondrial		2	NC_035108.1	317057851	317069439	plus	4
LOC5575756	62.5919	1.93728	0.352714	5.49251	3.96e-08	7.02e-07	LOC5575756	AaeL_AAEL002726, AAEL002726	37 kDa salivary gland allergen Aed a 2-like	37 kDa salivary gland allergen Aed a 2-like		2	NC_035108.1	13520551	13522025	minus	5
LOC23687871	1800.09	1.07639	0.196	5.49179	3.98e-08	7.04e-07	LOC23687871	AaeL_AAEL017451, AAEL017451	angiotensin-converting enzyme	angiotensin-converting enzyme		2	NC_035108.1	432592105	432594729	minus	7
LOC5570052	794.526	-0.685953	0.124964	-5.48918	4.04e-08	7.14e-07	LOC5570052	AaeL_AAEL000210, AAEL000210	39S ribosomal protein L2, mitochondrial	39S ribosomal protein L2, mitochondrial		3	NC_035109.1	216221170	216227720	minus	2
LOC5571588	54.2007	2.69214	0.490537	5.48816	4.06e-08	7.17e-07	LOC5571588	AaeL_AAEL009178, AAEL009178, GNBPB4	beta-1,3-glucan-binding protein	beta-1,3-glucan-binding protein		3	NC_035109.1	176005497	176006888	minus	3
LOC5568457	766.743	1.44917	0.264114	5.4869	4.09e-08	7.21e-07	LOC5568457	AaeL_AAEL006854, AAEL006854	protein NPC2 homolog	protein NPC2 homolog		3	NC_035109.1	370350600	370365285	minus	4
LOC5573751	3033.52	0.880768	0.160542	5.48622	4.11e-08	7.23e-07	LOC5573751	AaeL_AAEL000294, AAEL000294	uncharacterized LOC5573751	uncharacterized protein LOC5573751		3	NC_035109.1	265013033	265030893	minus	5
LOC5573903	7848.2	1.00883	0.183909	5.4855	4.12e-08	7.25e-07	LOC5573903	AaeL_AAEL002185, AAEL002185	adult cuticle protein 1	adult cuticle protein 1		2	NC_035108.1	428783502	428784321	plus	2
LOC110675526	27.6383	2.64407	0.482055	5.48501	4.13e-08	7.26e-07	LOC110675526	AaeL_AAEL006213, AAEL006213	protein artichoke-like	protein artichoke-like		2	NC_035108.1	50214492	50216887	minus	1
LOC5572760	1114.97	1.76051	0.321068	5.48331	4.17e-08	7.33e-07	LOC5572760	AaeL_AAEL014936, AAEL014936	sarcosine dehydrogenase, mitochondrial	sarcosine dehydrogenase, mitochondrial		2	NC_035108.1	110941322	110959449	plus	7
LOC5572170	1962.87	-1.10329	0.201344	-5.47964	4.26e-08	7.47e-07	LOC5572170	AaeL_AAEL009585, AAEL009585	protein obstructor-E	protein obstructor-E		1	NC_035107.1	147253663	147294998	plus	3
LOC5577436	561.318	1.02506	0.187162	5.47687	4.33e-08	7.58e-07	LOC5577436	AaeL_AAEL013182, AAEL013182	putative ATP-dependent RNA helicase DHX57	putative ATP-dependent RNA helicase DHX57		3	NC_035109.1	30414347	30447401	minus	3
LOC5565778	3329.81	-0.701598	0.12812	-5.47611	4.35e-08	7.6e-07	LOC5565778	AaeL_AAEL004972, AAEL004972	proline-rich extensin-like protein EPR1	FK506-binding protein 5|proline-rich extensin-like protein EPR1|protein piccolo|uncharacterized protein LOC5565778		2	NC_035108.1	281909748	282025156	minus	16
LOC5570692	1111.66	0.994907	0.18171	5.47524	4.37e-08	7.63e-07	LOC5570692		mitochondrial basic amino acids transporter	LOW QUALITY PROTEIN: mitochondrial basic amino acids transporter		Un	NW_018734921.1	7617	21651	minus	3
LOC5566300	164.801	-1.17799	0.215157	-5.47501	4.37e-08	7.63e-07	LOC5566300	AaeL_AAEL005309, AAEL005309	high mobility group protein 20A	high mobility group protein 20A		3	NC_035109.1	309576895	309579242	minus	2
LOC5571612	414.669	-0.935825	0.170932	-5.47483	4.38e-08	7.63e-07	LOC5571612	AaeL_AAEL009206, AAEL009206	solute carrier family 22 member 4	solute carrier family 22 member 4		3	NC_035109.1	391040297	391042582	minus	3
LOC5573233	466.031	1.17017	0.213758	5.47428	4.39e-08	7.64e-07	LOC5573233	AaeL_AAEL010326, AAEL010326, PTER_AEDAE	phosphotriesterase-related protein	phosphotriesterase-related protein		3	NC_035109.1	409061581	409074515	plus	6
LOC5577434	791.74	0.672728	0.122918	5.47299	4.43e-08	7.69e-07	LOC5577434	AaeL_AAEL013184, AAEL013184	open rectifier potassium channel protein 1	open rectifier potassium channel protein 1		3	NC_035109.1	30508330	30640555	plus	10
LOC5574622	871.212	-0.919662	0.16804	-5.47286	4.43e-08	7.69e-07	LOC5574622	AaeL_AAEL011265, AAEL011265	ATP-binding cassette sub-family G member 8	ATP-binding cassette sub-family G member 8		1	NC_035107.1	215452060	215689779	minus	13
LOC110680504	7613.67	0.697693	0.127512	5.47157	4.46e-08	7.73e-07	LOC110680504		uncharacterized LOC110680504	uncharacterized protein LOC110680504		Un	NW_018734947.1	5357	9715	plus	3
LOC5569716	290.961	1.17851	0.215427	5.47055	4.49e-08	7.77e-07	LOC5569716	AaeL_AAEL007864, AAEL007864	zinc finger protein OZF	zinc finger protein OZF		2	NC_035108.1	461091709	461105194	plus	4
LOC110680223	5524.63	-0.728115	0.133114	-5.46985	4.5e-08	7.79e-07	LOC110680223		heat shock 70 kDa protein cognate 3	heat shock 70 kDa protein cognate 3		Un	NW_018734480.1	6546	18756	minus	4
LOC5571510	1831.53	-0.9914	0.18127	-5.4692	4.52e-08	7.81e-07	LOC5571510	AaeL_AAEL001629, AAEL001629	cAMP-specific 3',5'-cyclic phosphodiesterase	cAMP-specific 3',5'-cyclic phosphodiesterase		1	NC_035107.1	137472422	137832806	minus	19
LOC5577347	618.747	1.07217	0.196084	5.46794	4.55e-08	7.86e-07	LOC5577347	AaeL_AAEL000438, AAEL000438	epoxide hydrolase 4	epoxide hydrolase 4		3	NC_035109.1	184380564	184404806	plus	6
LOC5564024	755.052	-0.677295	0.123891	-5.46688	4.58e-08	7.89e-07	LOC5564024	AaeL_AAEL014282, AAEL014282, AAEL801127	COP9 signalosome complex subunit 6	COP9 signalosome complex subunit 6		2	NC_035108.1	399881925	399885719	plus	3
LOC5578360	3818.57	0.811902	0.148615	5.46312	4.68e-08	8.05e-07	LOC5578360	AaeL_AAEL003512, AAEL003512, AQP_AEDAE, aquaporin	aquaporin AQPAe.a	aquaporin AQPAe.a		2	NC_035108.1	256759566	256825083	plus	5
LOC23687646	478.13	1.36946	0.250697	5.4626	4.69e-08	8.07e-07	LOC23687646	AaeL_AAEL017226, AAEL017226	lysosomal alpha-glucosidase	lysosomal alpha-glucosidase		3	NC_035109.1	22852348	22886460	plus	5
LOC5569932	2255.96	-0.719714	0.131804	-5.46047	4.75e-08	8.15e-07	LOC5569932	AaeL_AAEL008028, AAEL008028	uncharacterized LOC5569932	uncharacterized protein LOC5569932		1	NC_035107.1	51981488	52146987	minus	11
LOC5577475	1502.23	-1.4378	0.263541	-5.45571	4.88e-08	8.37e-07	LOC5577475	AaeL_AAEL013222, AAEL013222	protein obstructor-E	protein obstructor-E		2	NC_035108.1	314391509	314416287	minus	4
LOC5568649	150.783	-1.32531	0.242931	-5.45552	4.88e-08	8.37e-07	LOC5568649	AaeL_AAEL007018, AAEL007018	UDP-glucose 4-epimerase	UDP-glucose 4-epimerase		2	NC_035108.1	242116988	242170562	minus	5
LOC5566493	3998.07	0.647469	0.118699	5.45473	4.9e-08	8.39e-07	LOC5566493	AaeL_AAEL005432, AAEL005432	protein mesh	protein mesh|septate junction protein mesh		1	NC_035107.1	80493515	80509141	plus	11
LOC5573879	10106.4	-0.46505	0.0852705	-5.45382	4.93e-08	8.43e-07	LOC5573879	AaeL_AAEL010801, AAEL010801	cytochrome b-c1 complex subunit 6, mitochondrial	cytochrome b-c1 complex subunit 6, mitochondrial|mitochondrial ubiquinol-cytochrome c reductase hinge protein		3	NC_035109.1	156709322	156710176	minus	3
LOC5566992	2016.39	-0.882275	0.1618	-5.45287	4.96e-08	8.46e-07	LOC5566992	AaeL_AAEL005738, AAEL005738	protein yellow	protein yellow		2	NC_035108.1	293960086	294032082	minus	3
LOC5571157	299.601	-0.866449	0.159011	-5.44899	5.07e-08	8.64e-07	LOC5571157	AaeL_AAEL008847, AAEL008847	protein Wnt-1	protein Wnt-1		2	NC_035108.1	241653762	241788597	plus	9
LOC110678773	504.727	-0.891245	0.163584	-5.44824	5.09e-08	8.66e-07	LOC110678773		uncharacterized LOC110678773	uncharacterized protein LOC110678773		1	NC_035107.1	158154389	158228665	minus	10
LOC110679834	1770.72	-0.975575	0.179068	-5.44806	5.09e-08	8.66e-07	LOC110679834	AaeL_AAEL008159, AAEL008159	3-oxoacyl-[acyl-carrier-protein] reductase FabG-like	uncharacterized protein LOC110679834		3	NC_035109.1	10074481	10076158	plus	2
LOC5565861	122.432	1.56184	0.286705	5.44757	5.11e-08	8.68e-07	LOC5565861	AaeL_AAEL005030, AAEL005030	uncharacterized LOC5565861	uncharacterized protein LOC5565861		2	NC_035108.1	445089852	445106604	minus	4
LOC5572778	932.811	-0.875015	0.160807	-5.44141	5.29e-08	8.97e-07	LOC5572778		26S proteasome non-ATPase regulatory subunit 6	26S proteasome non-ATPase regulatory subunit 6		1	NC_035107.1	159363373	159364858	minus	2
LOC5575019	2653.02	0.725896	0.133582	5.43408	5.51e-08	9.34e-07	LOC5575019	AaeL_AAEL011575, AAEL011575	cysteine and histidine-rich protein 1 homolog	cysteine and histidine-rich protein 1 homolog		3	NC_035109.1	106744435	106785949	minus	6
LOC5566650	202.641	0.891901	0.164233	5.43072	5.61e-08	9.5e-07	LOC5566650	AaeL_AAEL005499, AAEL005499, AAEL015644	multidrug resistance-associated protein 9	multidrug resistance-associated protein 9		1	NC_035107.1	193810018	193840226	plus	9
LOC5570998	585.447	-1.36267	0.250954	-5.42995	5.64e-08	9.53e-07	LOC5570998	AaeL_AAEL008735, AAEL008735, AAEL008747	uncharacterized LOC5570998	uncharacterized protein LOC5570998		3	NC_035109.1	280597943	280922614	minus	11
LOC5570218	565.704	-0.997553	0.183736	-5.42926	5.66e-08	9.56e-07	LOC5570218	AaeL_AAEL008153, AAEL008153	arrestin domain-containing protein 2	arrestin domain-containing protein 2		3	NC_035109.1	9620215	9621789	plus	4
LOC5568004	666.062	1.09741	0.202199	5.42735	5.72e-08	9.65e-07	LOC5568004	AaeL_AAEL006434, AAEL006434	serine protease 7	polyserase-2|serine protease 7|polyserase 2-like protein		2	NC_035108.1	439755190	439757242	plus	3
LOC5566371	443.206	0.846878	0.156079	5.42596	5.76e-08	9.71e-07	LOC5566371	AaeL_AAEL005364, AAEL005364	AP-1 complex subunit gamma-1	AP-1 complex subunit gamma-1		3	NC_035109.1	34506956	34686835	minus	13
LOC5573480	801.242	0.676366	0.124665	5.42545	5.78e-08	9.73e-07	LOC5573480	AaeL_AAEL010524, AAEL010524	protein eiger	protein eiger		2	NC_035108.1	26308415	26364840	minus	7
LOC5575805	582.364	-0.783218	0.144421	-5.42316	5.86e-08	9.84e-07	LOC5575805	AaeL_AAEL012084, AAEL012084	ubiquitin-like protein 7	ubiquitin-like protein 7		3	NC_035109.1	160365161	160380361	plus	2
LOC23687682	23688.8	-1.18501	0.218535	-5.42253	5.88e-08	9.87e-07	LOC23687682	AaeL_AAEL017262, AAEL017262	protein snwA	protein snwA		2	NC_035108.1	288476236	288477287	plus	2
LOC5574592	4350.57	0.515885	0.0951437	5.42217	5.89e-08	9.88e-07	LOC5574592	AaeL_AAEL002411, AAEL002411	renin receptor	renin receptor		1	NC_035107.1	176815550	176841558	minus	6
LOC110680812	43.2032	-1.87191	0.345515	-5.41772	6.04e-08	1.01e-06	LOC110680812		uncharacterized LOC110680812	uncharacterized protein LOC110680812		Un	NW_018735351.1	6390	7650	minus	1
LOC5563725	3951.51	1.15756	0.213665	5.41764	6.04e-08	1.01e-06	LOC5563725	AaeL_AAEL014078, AAEL014078	serine protease inhibitor 27A	serine protease inhibitor 27A		2	NC_035108.1	132319515	132330329	plus	7
LOC23687435	110.505	-2.133	0.394052	-5.41298	6.2e-08	1.04e-06	LOC23687435	AaeL_AAEL017015, AAEL017015	serine, glycine and glutamine-rich protein	serine, glycine and glutamine-rich protein		1	NC_035107.1	79869406	79879195	plus	2
LOC5573204	6014.8	0.893356	0.16541	5.40086	6.63e-08	1.11e-06	LOC5573204	AaeL_AAEL001965, AAEL001965	chitinase-like protein Idgf4	chitinase-like protein Idgf4		2	NC_035108.1	425532620	425541312	minus	3
LOC5579822	831.961	0.914865	0.169435	5.39952	6.68e-08	1.11e-06	LOC5579822	AaeL_AAEL005521, AAEL005521	lysosomal Pro-X carboxypeptidase	lysosomal Pro-X carboxypeptidase		1	NC_035107.1	9064368	9066375	plus	4
LOC5575017	1235.01	1.07616	0.199595	5.39172	6.98e-08	1.16e-06	LOC5575017	AaeL_AAEL011566, AAEL011566	hemicentin-1	hemicentin-1		3	NC_035109.1	106899109	106908342	minus	10
LOC110678859	890.744	-0.838367	0.155525	-5.39055	7.02e-08	1.17e-06	LOC110678859	AaeL_AAEL010048, AAEL010048	26S proteasome non-ATPase regulatory subunit 6-like	26S proteasome non-ATPase regulatory subunit 6-like		1	NC_035107.1	159395666	159397179	minus	2
LOC5571302	2251.75	-1.24203	0.230418	-5.39036	7.03e-08	1.17e-06	LOC5571302	AaeL_AAEL008956, AAEL008956	uncharacterized protein CG5902	uncharacterized protein CG5902		1	NC_035107.1	81431485	81464975	plus	5
LOC5571023	117.133	-1.80398	0.33508	-5.38374	7.3e-08	1.21e-06	LOC5571023	AaeL_AAEL008765, AAEL008765	pro-resilin	pro-resilin		3	NC_035109.1	326816088	326823414	plus	3
LOC110675612	1150.27	1.5767	0.292915	5.3828	7.33e-08	1.22e-06	LOC110675612		uncharacterized LOC110675612			2	NC_035108.1	64884114	64896642	plus	3
LOC5571771	498.781	-0.788999	0.146581	-5.38268	7.34e-08	1.22e-06	LOC5571771	AaeL_AAEL009288, AAEL009288	39S ribosomal protein L48, mitochondrial	39S ribosomal protein L48, mitochondrial		2	NC_035108.1	17464009	17466456	plus	3
LOC5565989	167.932	-0.952584	0.177205	-5.37561	7.63e-08	1.26e-06	LOC5565989	AaeL_AAEL015034, AAEL015034	prostaglandin reductase 1	prostaglandin reductase 1		1	NC_035107.1	29236279	29238461	plus	2
LOC5580278	2338.79	-0.486685	0.0905405	-5.37533	7.64e-08	1.26e-06	LOC5580278	AaeL_AAEL003011, AAEL003011	NADH dehydrogenase [ubiquinone] 1 alpha subcomplex subunit 2	NADH dehydrogenase [ubiquinone] 1 alpha subcomplex subunit 2		3	NC_035109.1	39991995	39992718	minus	3
LOC5565363	24.6683	-4.46791	0.831949	-5.37042	7.86e-08	1.3e-06	LOC5565363	AaeL_AAEL004762, AAEL004762	cuticle protein 8	cuticle protein 8		2	NC_035108.1	288280150	288281314	plus	2
LOC5579817	836.776	0.694604	0.129421	5.36701	8.01e-08	1.32e-06	LOC5579817	AaeL_AAEL005531, AAEL005531	venom allergen 5	venom allergen 5		1	NC_035107.1	8639468	8662551	minus	4
LOC5565246	8278.51	0.839243	0.156394	5.3662	8.04e-08	1.32e-06	LOC5565246	AaeL_AAEL014768, AAEL014768, GltS	putative glutamate synthase [NADPH]	glutamate synthase 1 [NADH], chloroplastic|putative glutamate synthase [NADPH]|glutamate synthase		2	NC_035108.1	85272601	85322479	plus	13
LOC5578336	871.819	0.881477	0.164306	5.36485	8.1e-08	1.33e-06	LOC5578336	AaeL_AAEL003518, AAEL003518, AAEL003521	calcium-transporting ATPase type 2C member 1	calcium-transporting ATPase type 2C member 1		3	NC_035109.1	263761175	264021306	minus	12
LOC5576776	146.28	-1.08732	0.202804	-5.36144	8.26e-08	1.36e-06	LOC5576776	AaeL_AAEL012773, AAEL012773, CYP325M1	probable cytochrome P450 313a4	probable cytochrome P450 313a4		3	NC_035109.1	111544339	111561877	plus	5
LOC5578654	4765.88	-0.750418	0.140004	-5.35998	8.32e-08	1.37e-06	LOC5578654	AaeL_AAEL013800, AAEL013800	uncharacterized LOC5578654	uncharacterized protein LOC5578654		1	NC_035107.1	61121094	61192818	plus	10
LOC5573287	1307.88	0.932681	0.174045	5.35885	8.38e-08	1.37e-06	LOC5573287	AaeL_AAEL010366, AAEL010366	UDP-glucuronosyltransferase 1-7	UDP-glucuronosyltransferase 1-7|UDP-glucosyl transferase|UDP-glucuronosyl transferase		2	NC_035108.1	182779612	182781579	minus	3
LOC5579108	1425.17	0.604637	0.112986	5.35144	8.73e-08	1.43e-06	LOC5579108	AaeL_AAEL003844, AAEL003844, GALE5	galectin-9	formin-like protein 5|galectin-9		3	NC_035109.1	342738222	342744143	minus	8
LOC5568365	13328.9	-0.63784	0.119191	-5.35142	8.73e-08	1.43e-06	LOC5568365	AaeL_AAEL001091, AAEL001091	NADP-dependent malic enzyme	NADP-dependent malic enzyme		1	NC_035107.1	299200760	299218424	minus	4
LOC5567530	708.374	-0.679028	0.126892	-5.35121	8.74e-08	1.43e-06	LOC5567530	AaeL_AAEL006133, AAEL006133, AAEL017275	tubulin-specific chaperone A	programmed cell death protein 7|tubulin-specific chaperone A		3	NC_035109.1	68799605	68804862	plus	2
LOC5576452	1203.54	0.83025	0.15519	5.3499	8.8e-08	1.44e-06	LOC5576452	AaeL_AAEL012536, AAEL012536	protein javelin	protein javelin		2	NC_035108.1	82986584	83031530	minus	6
LOC5565763	2211.63	1.3838	0.258683	5.3494	8.82e-08	1.44e-06	LOC5565763	AaeL_AAEL004969, AAEL004969	uncharacterized LOC5565763	uncharacterized protein LOC5565763		2	NC_035108.1	282082399	282115442	plus	26
LOC5565677	983.609	1.73174	0.323759	5.34887	8.85e-08	1.44e-06	LOC5565677		sarcosine dehydrogenase, mitochondrial	LOW QUALITY PROTEIN: sarcosine dehydrogenase, mitochondrial		Un	NW_018735394.1	10563	28668	minus	7
LOC5568355	4184.74	-0.880562	0.164797	-5.34333	9.13e-08	1.48e-06	LOC5568355	AaeL_AAEL001061, AAEL001061, GSTD1	glutathione S-transferase 1	glutathione S-transferase 1		1	NC_035107.1	299812634	299826451	plus	5
LOC5564138	7602.73	-0.735528	0.137934	-5.33245	9.69e-08	1.57e-06	LOC5564138	AaeL_AAEL004085, AAEL004085, AAEL004099	trichohyalin	interaptin|trichohyalin|uncharacterized protein LOC5564138		3	NC_035109.1	401578643	401666744	plus	12
LOC5567053	5755.63	-1.26714	0.237628	-5.33244	9.69e-08	1.57e-06	LOC5567053	AaeL_AAEL005772, AAEL005772	general odorant-binding protein 99a	general odorant-binding protein 99a|odorant binding protein		1	NC_035107.1	122385671	122386441	plus	2
LOC23687890	465.7	0.670574	0.1258	5.33045	9.8e-08	1.59e-06	LOC23687890	AaeL_AAEL017470, AAEL017470	PAS domain-containing serine/threonine-protein kinase	PAS domain-containing serine/threonine-protein kinase		2	NC_035108.1	16407574	16486216	minus	7
LOC5568755	1264.69	1.1962	0.224559	5.32688	9.99e-08	1.62e-06	LOC5568755	AaeL_AAEL007103, AAEL007103	toll-like receptor Tollo	toll-like receptor Tollo		2	NC_035108.1	162961305	162963261	plus	2
LOC5565629	43007.9	-0.551273	0.10357	-5.32271	1.02e-07	1.65e-06	LOC5565629	AaeL_AAEL014913, AAEL012576, AAEL014913	pyruvate kinase	pyruvate kinase|AAEL012576-PB		1	NC_035107.1	285251770	285283471	plus	7
LOC110679672	83.4765	-1.55472	0.292111	-5.32237	1.02e-07	1.65e-06	LOC110679672		uncharacterized LOC110679672			3	NC_035109.1	27715066	27743707	minus	3
LOC5573469	1184.5	0.588538	0.110585	5.32202	1.03e-07	1.66e-06	LOC5573469	AaeL_AAEL010513, AAEL010513	transcription factor cwo	transcription factor cwo		1	NC_035107.1	242285573	242466393	plus	5
LOC110681515	81.0049	-1.61573	0.303758	-5.31914	1.04e-07	1.68e-06	LOC110681515		uncharacterized LOC110681515			1	NC_035107.1	210062427	210067334	minus	2
LOC5571183	21068.3	-0.512398	0.0963628	-5.31739	1.05e-07	1.69e-06	LOC5571183	AaeL_AAEL008887, AAEL008887	cytochrome c oxidase subunit 6B1	cytochrome c oxidase subunit 6B1		2	NC_035108.1	126254639	126265042	plus	2
LOC110676520	538.396	0.776106	0.146085	5.31269	1.08e-07	1.74e-06	LOC110676520		putative uncharacterized protein DDB_G0274435	putative uncharacterized protein DDB_G0274435		2	NC_035108.1	247936402	247938507	minus	2
LOC5566047	1209.2	-0.90319	0.170027	-5.31205	1.08e-07	1.74e-06	LOC5566047	AaeL_AAEL005147, AAEL005147	DNA-binding protein D-ETS-4	DNA-binding protein D-ETS-4		3	NC_035109.1	345618232	345687791	plus	7
LOC5571671	24.0734	5.06224	0.953556	5.3088	1.1e-07	1.77e-06	LOC5571671	AaeL_AAEL001650, AAEL001650	mite group 2 allergen Gly d 2.02	mite group 2 allergen Gly d 2.02		2	NC_035108.1	298787901	298788694	plus	2
LOC5570014	2132.64	-0.922512	0.173794	-5.30808	1.11e-07	1.78e-06	LOC5570014	AaeL_AAEL000179, AAEL000179	ubiquitin-conjugating enzyme E2 L3	ubiquitin-conjugating enzyme E2 L3		3	NC_035109.1	212830846	212839647	plus	4
LOC5577689	127.43	-1.09816	0.206932	-5.30686	1.12e-07	1.79e-06	LOC5577689	AaeL_AAEL013324, AAEL013324	protein takeout	protein takeout		3	NC_035109.1	74983571	75008074	plus	4
LOC5568470	122.354	-1.4334	0.27018	-5.30535	1.12e-07	1.8e-06	LOC5568470	AaeL_AAEL006892, AAEL006892	uncharacterized LOC5568470	uncharacterized protein LOC5568470		2	NC_035108.1	25726881	25728149	minus	3
LOC5564510	5060.44	1.24249	0.234295	5.30311	1.14e-07	1.82e-06	LOC5564510	AaeL_AAEL004278, AAEL004278	cytochrome b5-related protein	cytochrome b5-related protein		2	NC_035108.1	293663689	293715372	plus	6
LOC5574371	597.451	-0.794369	0.149828	-5.30189	1.15e-07	1.83e-06	LOC5574371	AaeL_AAEL011095, AAEL011095	polypeptide N-acetylgalactosaminyltransferase 2	polypeptide N-acetylgalactosaminyltransferase 2		2	NC_035108.1	232275168	232326780	minus	3
LOC5567424	2041.56	-0.779017	0.146932	-5.30188	1.15e-07	1.83e-06	LOC5567424	AaeL_AAEL006065, AAEL006065	probable methyltransferase-like protein 15 homolog	probable methyltransferase-like protein 15 homolog		1	NC_035107.1	183181226	183183054	plus	2
LOC5576488	830.882	0.832073	0.156991	5.30013	1.16e-07	1.84e-06	LOC5576488	AaeL_AAEL002900, AAEL002900	uncharacterized LOC5576488	uncharacterized protein LOC5576488|hypothetical conserved protein		1	NC_035107.1	108768573	108769988	minus	3
LOC5572767	568.194	-0.859812	0.162227	-5.30005	1.16e-07	1.84e-06	LOC5572767	AaeL_AAEL013686, AAEL010024, AAEL013686	uncharacterized LOC5572767	uncharacterized protein LOC5572767|putative microtubule-associated protein futsch		2	NC_035108.1	111217676	111246808	minus	7
LOC5571136	409.586	0.89276	0.168498	5.29833	1.17e-07	1.86e-06	LOC5571136	AaeL_AAEL008828, AAEL008828	carbonic anhydrase 2	carbonic anhydrase 2		3	NC_035109.1	32495749	32529182	minus	7
LOC5570740	3960.95	-1.03098	0.194789	-5.29281	1.2e-07	1.91e-06	LOC5570740	AaeL_AAEL008513, AAEL004279, AAEL008513	zinc finger CCCH domain-containing protein 18	zinc finger CCCH domain-containing protein 18		2	NC_035108.1	99558201	99914672	minus	10
LOC5577974	2821.68	-0.551021	0.104149	-5.29072	1.22e-07	1.93e-06	LOC5577974	AaeL_AAEL011554, AAEL011554	proteasomal ubiquitin receptor ADRM1 homolog	proteasomal ubiquitin receptor ADRM1 homolog		3	NC_035109.1	312846437	312868732	minus	3
LOC110676510	179.974	1.0949	0.207055	5.28798	1.24e-07	1.96e-06	LOC110676510		uncharacterized LOC110676510			2	NC_035108.1	243248753	243292461	plus	2
LOC5571520	67.2845	1.97376	0.373566	5.28356	1.27e-07	2e-06	LOC5571520	AaeL_AAEL009108, AAEL009108	aminopeptidase N	aminopeptidase N		1	NC_035107.1	234024434	234027512	plus	3
LOC5578506	124.505	6.41585	1.21431	5.28355	1.27e-07	2e-06	LOC5578506	AaeL_AAEL013707, AAEL013707	trypsin 5G1-like	trypsin 5G1-like		3	NC_035109.1	307774308	307775248	minus	1
LOC5570597	373.325	-0.938851	0.177828	-5.27955	1.3e-07	2.04e-06	LOC5570597	AaeL_AAEL008412, AAEL008412	mitochondrial import inner membrane translocase subunit TIM44	mitochondrial import inner membrane translocase subunit TIM44		Un	NW_018736312.1	37836	39758	plus	3
LOC5575778	6326.47	0.586918	0.111185	5.27874	1.3e-07	2.05e-06	LOC5575778	AaeL_AAEL002705, AAEL002705	TLD domain-containing protein 2	TLD domain-containing protein 2|oxidation resistance protein 1|uncharacterized protein LOC5575778		3	NC_035109.1	124918308	125554053	minus	29
LOC5568484	10340.6	-0.745373	0.141384	-5.27197	1.35e-07	2.12e-06	LOC5568484	AaeL_AAEL006897, AAEL005430, AAEL005439, AAEL006897	F-actin-methionine sulfoxide oxidase Mical	F-actin-methionine sulfoxide oxidase Mical		1	NC_035107.1	79041398	79252109	plus	25
LOC5574552	187.823	-1.28336	0.24348	-5.2709	1.36e-07	2.13e-06	LOC5574552	AaeL_AAEL011232, AAEL011232	uncharacterized LOC5574552	uncharacterized protein LOC5574552		3	NC_035109.1	239508388	239525959	minus	4
LOC5578455	191.733	2.47334	0.469336	5.26986	1.37e-07	2.14e-06	LOC5578455	AaeL_AAEL000500, AAEL000500	uncharacterized LOC5578455	uncharacterized protein LOC5578455		3	NC_035109.1	161694680	161695786	plus	3
LOC5565318	1433.37	-0.694644	0.131877	-5.26735	1.38e-07	2.17e-06	LOC5565318	AaeL_AAEL004733, AAEL004733	26S proteasome non-ATPase regulatory subunit 14	26S proteasome non-ATPase regulatory subunit 14|26S proteasome regulatory complex subunit RPN11		2	NC_035108.1	379310203	379314070	plus	4
LOC5564341	13951.6	-1.38105	0.262207	-5.267	1.39e-07	2.17e-06	LOC5564341	AaeL_AAEL004212, AAEL004212	leucine-rich repeat-containing protein 20	leucine-rich repeat-containing protein 20		3	NC_035109.1	116190907	116245169	minus	4
LOC5578480	124.111	-1.13801	0.216199	-5.26373	1.41e-07	2.21e-06	LOC5578480	AaeL_AAEL000519, AAEL000519	uncharacterized LOC5578480	uncharacterized protein LOC5578480		3	NC_035109.1	160957886	160971135	plus	3
LOC5571496	957.737	-1.08572	0.206278	-5.26336	1.41e-07	2.21e-06	LOC5571496	AaeL_AAEL001627, AAEL001627, UAP	UDP-N-acetylhexosamine pyrophosphorylase	UDP-N-acetylhexosamine pyrophosphorylase|UDP-N-acetylglucosamine pyrophosphorylase		1	NC_035107.1	138809374	138812076	plus	1
LOC5568536	704.764	-0.651975	0.12397	-5.25914	1.45e-07	2.26e-06	LOC5568536	AaeL_AAEL006949, AAEL006949	suppressor of cytokine signaling 7	suppressor of cytokine signaling 7|uncharacterized protein LOC5568536		1	NC_035107.1	157454353	157511430	plus	8
LOC5580175	1733.26	-1.22171	0.232462	-5.2555	1.48e-07	2.3e-06	LOC5580175	AaeL_AAEL002555, AAEL002555	sodium-coupled monocarboxylate transporter 1	sodium-coupled monocarboxylate transporter 1		1	NC_035107.1	227199405	227301003	plus	10
LOC5566951	721.999	-0.620775	0.118151	-5.25409	1.49e-07	2.32e-06	LOC5566951	AaeL_AAEL005715, AAEL005715, AAEL007172	nudix hydrolase 2	nudix hydrolase 2		3	NC_035109.1	191968639	192008000	plus	5
LOC5575879	3169.85	-1.22525	0.233305	-5.2517	1.51e-07	2.35e-06	LOC5575879		uncharacterized LOC5575879	uncharacterized protein LOC5575879		1	NC_035107.1	105525675	105584949	minus	7
LOC5566066	367.476	-0.783132	0.149155	-5.25047	1.52e-07	2.36e-06	LOC5566066		uncharacterized LOC5566066	uncharacterized protein LOC5566066		3	NC_035109.1	345467594	345482917	plus	3
LOC5575411	1327.74	0.528667	0.100701	5.24985	1.52e-07	2.37e-06	LOC5575411	AaeL_AAEL011817, AAEL011817	regulator of nonsense transcripts 1 homolog	regulator of nonsense transcripts 1 homolog		3	NC_035109.1	113291522	113318310	plus	4
LOC5573886	814.696	1.70122	0.324271	5.24627	1.55e-07	2.41e-06	LOC5573886	AaeL_AAEL010804, AAEL010804	calcium/calmodulin-dependent protein kinase kinase 1	calcium/calmodulin-dependent protein kinase kinase 1		3	NC_035109.1	156087691	156559561	plus	12
LOC5579115	688.53	-0.835225	0.159303	-5.243	1.58e-07	2.45e-06	LOC5579115	AaeL_AAEL003864, AAEL003864	uncharacterized LOC5579115	uncharacterized protein LOC5579115		3	NC_035109.1	342858078	342859960	minus	3
LOC5567698	1707.88	-0.590196	0.112709	-5.23646	1.64e-07	2.53e-06	LOC5567698	AaeL_AAEL006264, AAEL006264	solute carrier family 2, facilitated glucose transporter member 3	solute carrier family 2, facilitated glucose transporter member 3		2	NC_035108.1	221133369	221164799	minus	8
LOC5567773	56.5543	1.6301	0.311306	5.23634	1.64e-07	2.53e-06	LOC5567773	AaeL_AAEL000150, AAEL000150	omega-amidase NIT2	omega-amidase NIT2		1	NC_035107.1	197293688	197294955	minus	2
LOC5570428	827.249	0.980471	0.187273	5.23552	1.65e-07	2.54e-06	LOC5570428	AaeL_AAEL008331, AAEL008331	uncharacterized LOC5570428	uncharacterized protein LOC5570428		2	NC_035108.1	273030036	273237920	minus	6
LOC5571029	33.397	-2.37461	0.453641	-5.23456	1.65e-07	2.55e-06	LOC5571029	AaeL_AAEL008759, AAEL008759	bromodomain-containing protein 4B	bromodomain-containing protein 4B		3	NC_035109.1	326351202	326387376	plus	4
LOC5566796	133.258	1.29581	0.247716	5.23103	1.69e-07	2.6e-06	LOC5566796	AaeL_AAEL005647, AAEL005647, AAEL005654	uncharacterized LOC5566796	uncharacterized protein LOC5566796		2	NC_035108.1	381746063	381749947	plus	11
LOC110680265	366.908	-0.779637	0.149089	-5.22934	1.7e-07	2.62e-06	LOC110680265	AaeL_AAEL005140, AAEL005140	uncharacterized LOC110680265	uncharacterized protein LOC110680265		3	NW_018734557.1	114979	127399	plus	3
LOC5569906	279.922	-0.861488	0.164767	-5.22851	1.71e-07	2.63e-06	LOC5569906	AaeL_AAEL008001, AAEL008001	clavesin-1	clavesin-1		2	NC_035108.1	36835985	36883649	minus	4
LOC5565700	7496.27	0.765496	0.146536	5.22393	1.75e-07	2.69e-06	LOC5565700	AaeL_AAEL004930, AAEL004930	carbonic anhydrase	carbonic anhydrase		2	NC_035108.1	259725478	259780159	minus	4
LOC110679079	113.823	-1.55948	0.298606	-5.22252	1.77e-07	2.71e-06	LOC110679079		uncharacterized LOC110679079			3	NC_035109.1	233450088	233452444	minus	3
LOC5569118	3442.62	-0.464961	0.0890453	-5.22162	1.77e-07	2.72e-06	LOC5569118	AaeL_AAEL007375, AAEL007375	pyruvate dehydrogenase (acetyl-transferring) kinase, mitochondrial	pyruvate dehydrogenase (acetyl-transferring) kinase, mitochondrial		2	NC_035108.1	233362885	233408073	minus	9
LOC5569793	768.271	-0.667739	0.127981	-5.21746	1.81e-07	2.78e-06	LOC5569793	AaeL_AAEL001304, AAEL001304	nuclear hormone receptor FTZ-F1 beta	nuclear hormone receptor FTZ-F1 beta		2	NC_035108.1	449120683	449274623	plus	10
LOC5576873	4719.22	-1.41328	0.271075	-5.21359	1.85e-07	2.84e-06	LOC5576873	AaeL_AAEL003041, AAEL003041	pupal cuticle protein 27-like	DNA translocase FtsK|uncharacterized protein LOC5576873		1	NC_035107.1	131372437	131400400	plus	3
LOC5579498	370.969	0.745392	0.143037	5.21119	1.88e-07	2.87e-06	LOC5579498	AaeL_AAEL015251, AAEL015251	helicostatins	helicostatins|RVYDFGLamide|preproallatostatin		1	NC_035107.1	247665108	247818994	plus	4
LOC5571818	389.478	-0.900086	0.172739	-5.21069	1.88e-07	2.87e-06	LOC5571818	AaeL_AAEL001684, AAEL001684	protein boule	protein boule		2	NC_035108.1	86428164	86588969	plus	9
LOC5571080	12429.7	0.520194	0.0998489	5.20981	1.89e-07	2.88e-06	LOC5571080	AaeL_AAEL008787, AAEL008787, VATA_AEDAE, VhaA	V-type proton ATPase catalytic subunit A	V-type proton ATPase catalytic subunit A|V-ATPase 69 kDa subunit|V-ATPase A-subunit|V-ATPase subunit A|Vacuolar proton pump subunit alpha		3	NC_035109.1	132650975	132663676	minus	6
LOC5564200	1143.93	0.59317	0.11391	5.20734	1.92e-07	2.92e-06	LOC5564200	AaeL_AAEL014346, AAEL014346, AAEL014352	glycerophosphocholine phosphodiesterase GPCPD1	glycerophosphocholine phosphodiesterase GPCPD1		2	NC_035108.1	238594701	238714207	minus	10
LOC5571788	889.101	1.87156	0.359411	5.20728	1.92e-07	2.92e-06	LOC5571788		angiotensin-converting enzyme	angiotensin-converting enzyme		1	NC_035107.1	199507107	199551095	minus	8
LOC5577136	841.19	-1.09993	0.211421	-5.20259	1.97e-07	2.99e-06	LOC5577136	AaeL_AAEL003115, AAEL003115	leucine-rich repeat neuronal protein 2	leucine-rich repeat neuronal protein 2		3	NC_035109.1	277380727	277883392	minus	8
LOC110680627	32819.9	-1.36294	0.26205	-5.20108	1.98e-07	3.01e-06	LOC110680627		histidine-rich protein PFHRP-II-like	histidine-rich protein PFHRP-II-like		Un	NW_018735130.1	35381	36719	minus	2
LOC5580054	1551.17	-0.86656	0.166902	-5.19202	2.08e-07	3.16e-06	LOC5580054	AaeL_AAEL002171, AAEL002171	uncharacterized LOC5580054	uncharacterized protein LOC5580054		1	NC_035107.1	101796610	102057407	plus	10
LOC5570561	528.199	0.922039	0.177654	5.19009	2.1e-07	3.19e-06	LOC5570561	AaeL_AAEL008390, AAEL008390	receptor-type guanylate cyclase Gyc76C	receptor-type guanylate cyclase Gyc76C		3	NC_035109.1	225262867	225519555	plus	16
LOC5563945	1249.49	-0.55075	0.106123	-5.18972	2.11e-07	3.19e-06	LOC5563945	AaeL_AAEL014248, AAEL014248, AAEL801123	solute carrier family 52, riboflavin transporter, member 3-A	solute carrier family 52, riboflavin transporter, member 3-A		1	NC_035107.1	72368244	72414659	plus	6
LOC5573486	41.7169	-1.8255	0.351824	-5.18868	2.12e-07	3.2e-06	LOC5573486	AaeL_AAEL010518, AAEL008888, AAEL010518	myb-like protein AA	dendritic arbor reduction protein 1|myb-like protein AA|uncharacterized protein LOC5573486		2	NC_035108.1	126505351	126672224	plus	3
LOC5579820	4006.72	0.676227	0.130393	5.18608	2.15e-07	3.25e-06	LOC5579820	AaeL_AAEL005524, AAEL005524	putative adenosylhomocysteinase 3	putative adenosylhomocysteinase 3		1	NC_035107.1	8989285	9052055	plus	7
LOC5569178	10424.8	-0.699073	0.134846	-5.18424	2.17e-07	3.27e-06	LOC5569178	AaeL_AAEL007452, AAEL007452	uncharacterized LOC5569178	uncharacterized protein LOC5569178		2	NC_035108.1	291235239	291276612	plus	13
LOC5578877	309.672	0.864547	0.166915	5.17956	2.22e-07	3.35e-06	LOC5578877	AaeL_AAEL003729, AAEL003729, HOT, HOT_AEDAE	probable hydroxyacid-oxoacid transhydrogenase, mitochondrial	probable hydroxyacid-oxoacid transhydrogenase, mitochondrial		2	NC_035108.1	197476756	197493720	minus	5
LOC5567571	159.663	-1.09465	0.211403	-5.178	2.24e-07	3.38e-06	LOC5567571	AaeL_AAEL006165, AAEL006165, AAEL006170	putative uncharacterized protein DDB_G0282129	putative uncharacterized protein DDB_G0282129|putative uncharacterized protein DDB_G0291812|uncharacterized protein LOC5567571		1	NC_035107.1	125745893	126016939	plus	14
LOC110676173	2242.07	0.90729	0.175244	5.1773	2.25e-07	3.39e-06	LOC110676173		uncharacterized LOC110676173	uncharacterized protein LOC110676173|putative secreted protein		2	NC_035108.1	161719791	161720730	minus	1
LOC5576767	2630.24	-0.583582	0.112782	-5.17441	2.29e-07	3.44e-06	LOC5576767	AaeL_AAEL012751, AAEL012751, AAEL012753	protein phosphatase 1 regulatory subunit 12A	protein phosphatase 1 regulatory subunit 12A|protein phosphatase 1 regulatory subunit 12C		2	NC_035108.1	75671104	75932087	minus	21
LOC5575986	21961.9	-0.442111	0.0855338	-5.16884	2.36e-07	3.54e-06	LOC5575986	AaeL_AAEL002764, AAEL002764	dihydrolipoyllysine-residue succinyltransferase component of 2-oxoglutarate dehydrogenase complex, mitochondrial	dihydrolipoyllysine-residue succinyltransferase component of 2-oxoglutarate dehydrogenase complex, mitochondrial		1	NC_035107.1	231577094	231596424	plus	7
LOC110676905	142.312	-1.17749	0.227833	-5.16823	2.36e-07	3.55e-06	LOC110676905		hormone receptor 4-like	hormone receptor 4-like		2	NC_035108.1	367844115	367850589	plus	3
LOC5567996	1034.47	-0.566139	0.109554	-5.16769	2.37e-07	3.55e-06	LOC5567996	AaeL_AAEL006441, AAEL006441	proteasome subunit beta type-6	proteasome subunit beta type-6|proteasome subunit beta type 6 precursor-like protein		2	NC_035108.1	438674475	438675573	plus	3
LOC5563957	206.155	-1.308	0.25314	-5.16709	2.38e-07	3.56e-06	LOC5563957	AaeL_AAEL004002, AAEL004002	glucose dehydrogenase [FAD, quinone]	glucose dehydrogenase [FAD, quinone]		3	NC_035109.1	166573798	166655149	plus	4
LOC5575637	311.998	-1.30675	0.252995	-5.16512	2.4e-07	3.59e-06	LOC5575637	AaeL_AAEL011969, AAEL011969	protein-S-isoprenylcysteine O-methyltransferase	protein-S-isoprenylcysteine O-methyltransferase		3	NC_035109.1	45672347	45699552	plus	5
LOC5573442	244.57	-0.922879	0.178758	-5.16273	2.43e-07	3.64e-06	LOC5573442	AaeL_AAEL010478, AAEL010478	facilitated trehalose transporter Tret1-2 homolog	facilitated trehalose transporter Tret1-2 homolog		1	NC_035107.1	278916399	278918503	minus	2
LOC5574477	489.023	1.71728	0.332693	5.16175	2.45e-07	3.65e-06	LOC5574477	AaeL_AAEL002404, AAEL002404	tyrosine-protein kinase receptor torso	tyrosine-protein kinase receptor torso		2	NC_035108.1	214566733	214765147	minus	20
LOC5570205	10085.1	-0.451801	0.0875592	-5.15994	2.47e-07	3.68e-06	LOC5570205	AaeL_AAEL008167, AAEL008167	fumarate hydratase, mitochondrial	fumarate hydratase, mitochondrial		3	NC_035109.1	9298130	9329958	minus	6
LOC5570148	1741.74	0.922184	0.178742	5.15931	2.48e-07	3.69e-06	LOC5570148	AaeL_AAEL008134, AAEL008134	ATP-binding cassette sub-family B member 6, mitochondrial	ATP-binding cassette sub-family B member 6, mitochondrial		3	NC_035109.1	107404546	107431730	plus	5
LOC110681069	47.403	1.74298	0.337845	5.15911	2.48e-07	3.69e-06	LOC110681069		endothelin-converting enzyme 1-like	endothelin-converting enzyme 1-like		Un	NW_018736000.1	17195	18500	plus	6
LOC5568600	1752.39	-0.74981	0.145404	-5.15674	2.51e-07	3.73e-06	LOC5568600	AaeL_AAEL001102, AAEL001102	adenosine kinase	adenosine kinase		3	NC_035109.1	407099770	407114978	plus	4
LOC5573654	1465.5	0.955128	0.185228	5.15649	2.52e-07	3.74e-06	LOC5573654	AaeL_AAEL010640, AAEL010640	trifunctional purine biosynthetic protein adenosine-3	trifunctional purine biosynthetic protein adenosine-3		2	NC_035108.1	326796554	326831248	minus	7
LOC5564163	614.241	-0.643034	0.124752	-5.15452	2.54e-07	3.77e-06	LOC5564163	AaeL_AAEL004138, AAEL004138	signal peptide peptidase-like 3	signal peptide peptidase-like 3		3	NC_035109.1	153989317	154211116	plus	8
LOC5564166	241.947	1.03508	0.200841	5.15375	2.55e-07	3.78e-06	LOC5564166	AaeL_AAEL004126, AAEL004126, AAEL004135	fatty acid hydroxylase domain-containing protein 2	fatty acid hydroxylase domain-containing protein 2		3	NC_035109.1	154075524	154112210	minus	7
LOC5573180	303.296	-0.76059	0.147596	-5.15318	2.56e-07	3.79e-06	LOC5573180	AaeL_AAEL002002, AAEL002002	28S ribosomal protein S18b, mitochondrial	28S ribosomal protein S18b, mitochondrial		2	NC_035108.1	426587375	426588001	minus	1
LOC23687597	1592.5	-1.36132	0.26425	-5.15162	2.58e-07	3.82e-06	LOC23687597	AaeL_AAEL017177, AAEL017177	FK506-binding protein 5	FK506-binding protein 5		2	NC_035108.1	247959937	247998216	minus	4
LOC5567307	71.4712	-2.68758	0.521733	-5.15126	2.59e-07	3.82e-06	LOC5567307	AaeL_AAEL005960, AAEL005960	DNA-directed RNA polymerase II subunit RPB1	DNA-directed RNA polymerase II subunit RPB1		3	NC_035109.1	227712510	227726073	minus	2
LOC5567781	390.851	1.0649	0.206865	5.14779	2.64e-07	3.89e-06	LOC5567781	AaeL_AAEL000119, AAEL000119	4-coumarate--CoA ligase 1	4-coumarate--CoA ligase 1		1	NC_035107.1	195093307	195095524	plus	2
LOC5567734	1409.45	0.711052	0.138184	5.1457	2.67e-07	3.93e-06	LOC5567734	AaeL_AAEL006301, AAEL006301, fru	sex determination protein fruitless	broad-complex core protein|protein bric-a-brac 2|protein tramtrack, alpha isoform|sex determination protein fruitless		1	NC_035107.1	120839505	121621003	plus	24
LOC5568444	39854.3	-0.661848	0.12863	-5.14535	2.67e-07	3.93e-06	LOC5568444	AaeL_AAEL006866, AAEL006866	muscle LIM protein 1	muscle LIM protein 1|muscle LIM protein Mlp84B		3	NC_035109.1	369471621	369513706	plus	11
LOC5564382	112.981	1.34923	0.262227	5.14527	2.67e-07	3.93e-06	LOC5564382	AaeL_AAEL014411, AAEL014411, CYP304B3	probable cytochrome P450 304a1	probable cytochrome P450 304a1		1	NC_035107.1	286941356	286957486	plus	3
LOC5575671	1627.39	1.10552	0.214934	5.14354	2.7e-07	3.96e-06	LOC5575671	AaeL_AAEL002683, AAEL002683	xanthine dehydrogenase	xanthine dehydrogenase		2	NC_035108.1	464805900	464819668	plus	6
LOC110678819	122.617	-1.23052	0.239457	-5.13877	2.77e-07	4.06e-06	LOC110678819		neuropeptide-like protein 31	neuropeptide-like protein 31		3	NC_035109.1	178942416	178961290	plus	6
LOC5578768	847.883	0.89176	0.173667	5.13488	2.82e-07	4.14e-06	LOC5578768	AaeL_AAEL003688, AAEL003688	uncharacterized LOC5578768	uncharacterized protein LOC5578768		2	NC_035108.1	316953199	316968525	plus	5
LOC5565085	3414.19	-0.591269	0.115185	-5.13321	2.85e-07	4.17e-06	LOC5565085	AaeL_AAEL014723, AAEL014723	26S proteasome regulatory subunit 8	26S proteasome regulatory subunit 8		1	NC_035107.1	23573584	23575595	minus	3
LOC5577490	1512.55	0.656835	0.127967	5.13284	2.85e-07	4.18e-06	LOC5577490	AaeL_AAEL013233, AAEL013233, PIWI5	protein aubergine	protein aubergine		3	NC_035109.1	279943226	279965201	minus	5
LOC5577920	692.061	-0.905635	0.176469	-5.13197	2.87e-07	4.19e-06	LOC5577920	AaeL_AAEL003331, AAEL003331, AAEL801194	chaoptin	chaoptin		2	NC_035108.1	400107984	400159391	minus	8
LOC5567182	197.301	1.55248	0.302514	5.13192	2.87e-07	4.19e-06	LOC5567182	AaeL_AAEL000910, AAEL000910	fatty acyl-CoA reductase wat	fatty acyl-CoA reductase wat		3	NC_035109.1	335468356	335483125	minus	3
LOC110674861	33.1854	-1.96979	0.38387	-5.13141	2.88e-07	4.2e-06	LOC110674861		pupal cuticle protein-like	pupal cuticle protein-like		1	NC_035107.1	34924620	34926223	minus	2
LOC5563997	1419.21	-0.938053	0.182835	-5.1306	2.89e-07	4.21e-06	LOC5563997	AaeL_AAEL014255, AAEL014255	aquaporin-11	aquaporin-11|Aquaporin-6		3	NC_035109.1	295324396	295332474	minus	4
LOC5565274	196.628	4.62342	0.901513	5.12851	2.92e-07	4.25e-06	LOC5565274		argininosuccinate synthase	argininosuccinate synthase		1	NC_035107.1	118563830	118565192	minus	1
LOC5565618	885.77	0.669386	0.130531	5.12818	2.93e-07	4.26e-06	LOC5565618	AaeL_AAEL014901, AAEL014901	rho GTPase-activating protein conundrum	LOW QUALITY PROTEIN: rho GTPase-activating protein conundrum		2	NC_035108.1	257060734	257415027	plus	13
LOC110680502	32.0881	-2.08032	0.405783	-5.12668	2.95e-07	4.29e-06	LOC110680502		pupal cuticle protein-like	pupal cuticle protein-like		Un	NW_018734944.1	4837	6440	plus	2
LOC5573255	1182.74	-0.739731	0.144395	-5.12297	3.01e-07	4.37e-06	LOC5573255	AaeL_AAEL010344, AAEL010344	alpha-tocopherol transfer protein	alpha-tocopherol transfer protein		2	NC_035108.1	404354187	404419039	plus	4
LOC5564473	465.367	1.00041	0.19552	5.11668	3.11e-07	4.51e-06	LOC5564473	AaeL_AAEL014451, AAEL014451	uncharacterized LOC5564473	uncharacterized protein LOC5564473		2	NC_035108.1	118913325	118914820	plus	4
LOC5575843	2339.52	-0.558432	0.109281	-5.11007	3.22e-07	4.67e-06	LOC5575843	AaeL_AAEL012122, AAEL012122	probable 26S proteasome non-ATPase regulatory subunit 3	probable 26S proteasome non-ATPase regulatory subunit 3		2	NC_035108.1	405952687	405954461	minus	1
LOC23687901	11978.1	-0.463275	0.0906855	-5.10859	3.25e-07	4.7e-06	LOC23687901	AaeL_AAEL017481, AAEL017481	keratin, type I cytoskeletal 9	keratin, type I cytoskeletal 9		1	NC_035107.1	241962458	241972916	plus	3
LOC5571151	172448	-0.880494	0.172375	-5.10803	3.26e-07	4.71e-06	LOC5571151	AaeL_AAEL008844, AAEL008844	sarcoplasmic calcium-binding protein 1	sarcoplasmic calcium-binding protein 1		2	NC_035108.1	241191129	241251217	plus	6
LOC5574515	10174.6	0.683714	0.133936	5.10477	3.31e-07	4.78e-06	LOC5574515	AaeL_AAEL011195, AAEL010818, AAEL011195	phosphate carrier protein, mitochondrial	phosphate carrier protein, mitochondrial|mitochondrial phosphate carrier protein		3	NC_035109.1	51592106	51630214	minus	5
LOC110675736	40.8022	-1.96168	0.384556	-5.10115	3.38e-07	4.87e-06	LOC110675736		uncharacterized LOC110675736	uncharacterized protein LOC110675736		1	NC_035107.1	84321353	84363443	minus	3
LOC5567674	2874.88	-1.16474	0.228354	-5.10057	3.39e-07	4.88e-06	LOC5567674	AaeL_AAEL006250, AAEL006245, AAEL006250	zinc finger CCCH domain-containing protein 13	zinc finger CCCH domain-containing protein 13		3	NC_035109.1	63209649	63692979	plus	14
LOC5566885	571.364	0.803373	0.157609	5.09724	3.45e-07	4.96e-06	LOC5566885	AaeL_AAEL000816, AAEL000816	beta carbonic anhydrase 1	beta carbonic anhydrase 1		3	NC_035109.1	121343762	121353266	minus	5
LOC5577035	2028.69	-0.576281	0.113058	-5.09723	3.45e-07	4.96e-06	LOC5577035	AaeL_AAEL012943, AAEL012943	26S proteasome regulatory subunit 7	26S proteasome regulatory subunit 7		3	NC_035109.1	206206753	206214249	plus	5
LOC5572709	101.8	1.125	0.220777	5.09566	3.48e-07	4.99e-06	LOC5572709	AaeL_AAEL009978, AAEL009978	uncharacterized LOC5572709	uncharacterized protein LOC5572709		3	NC_035109.1	71838547	71841717	plus	4
LOC5566977	247.315	0.894497	0.175568	5.09487	3.49e-07	5.01e-06	LOC5566977	AaeL_AAEL005739, AAEL005739	chaoptin	chaoptin		2	NC_035108.1	437279085	437283393	minus	5
LOC5564809	2848.57	-0.559297	0.109818	-5.09296	3.53e-07	5.05e-06	LOC5564809	AaeL_AAEL014630, AAEL014630	cytochrome c-type heme lyase	cytochrome c-type heme lyase|holocytochrome c synthetase		1	NC_035107.1	242146044	242158230	minus	3
LOC5568510	227.563	1.55761	0.305847	5.09279	3.53e-07	5.05e-06	LOC5568510	AaeL_AAEL006920, AAEL006920	leucine-rich repeat-containing G-protein coupled receptor 6	leucine-rich repeat-containing G-protein coupled receptor 6		3	NC_035109.1	144049781	144051027	minus	2
LOC5572116	116.17	2.38115	0.467561	5.09271	3.53e-07	5.05e-06	LOC5572116	AaeL_AAEL009531, AAEL009531	Niemann-Pick type protein homolog 1B	Niemann-Pick type protein homolog 1B		1	NC_035107.1	39773076	39777604	minus	7
LOC5570857	2617.14	-0.498944	0.0980254	-5.08995	3.58e-07	5.12e-06	LOC5570857	AaeL_AAEL008634, AAEL008634, JNK-L, JNK-S	stress-activated protein kinase JNK	stress-activated protein kinase JNK		2	NC_035108.1	454879211	455130844	minus	13
LOC5567581	1237.24	-0.617702	0.121424	-5.08717	3.63e-07	5.19e-06	LOC5567581	AaeL_AAEL006174, AAEL006174	proteasome subunit beta type-3	proteasome subunit beta type-3|20S proteasome regulatory subunit beta type PSMB3/PUP3		3	NC_035109.1	141707507	141708486	plus	2
LOC5571079	391.5	-0.66574	0.131014	-5.08143	3.75e-07	5.35e-06	LOC5571079	AaeL_AAEL008800, AAEL008800	probable 28S ribosomal protein S26, mitochondrial	probable 28S ribosomal protein S26, mitochondrial		3	NC_035109.1	132671233	132672264	plus	3
LOC5572851	591.916	0.924144	0.181922	5.07988	3.78e-07	5.39e-06	LOC5572851	AaeL_AAEL010073, AAEL010073	nardilysin	nardilysin		3	NC_035109.1	209111296	209174077	plus	12
LOC5579021	5942.73	-0.505281	0.0994828	-5.07908	3.79e-07	5.4e-06	LOC5579021	AaeL_AAEL013960, AAEL013960	NADH dehydrogenase [ubiquinone] 1 beta subcomplex subunit 2, mitochondrial	NADH dehydrogenase [ubiquinone] 1 beta subcomplex subunit 2, mitochondrial|mitochondrial NADH-ubiquinone oxidoreductase AGGG subunit		3	NC_035109.1	57809851	57810628	minus	3
LOC5564549	557.263	1.05545	0.207813	5.07883	3.8e-07	5.4e-06	LOC5564549	AaeL_AAEL004317, AAEL004317	terminal uridylyltransferase Tailor	terminal uridylyltransferase Tailor		3	NC_035109.1	51114473	51139036	plus	3
LOC5566893	904.416	-0.824757	0.162399	-5.0786	3.8e-07	5.41e-06	LOC5566893	AaeL_AAEL000851, AAEL000851	uncharacterized LOC5566893	uncharacterized protein LOC5566893		3	NC_035109.1	362550224	362587729	plus	6
LOC5568730	383.12	1.29575	0.255345	5.07451	3.89e-07	5.52e-06	LOC5568730	AaeL_AAEL010836, AAEL010836	FGGY carbohydrate kinase domain-containing protein	FGGY carbohydrate kinase domain-containing protein		2	NC_035108.1	128122754	128130170	minus	5
LOC5564141	1077.21	0.930343	0.183344	5.07431	3.89e-07	5.52e-06	LOC5564141	AaeL_AAEL004120, AAEL004120	MD-2-related lipid-recognition protein	MD-2-related lipid-recognition protein		3	NC_035109.1	403503142	403504277	minus	3
LOC5570219	1490.05	-0.99785	0.196652	-5.07419	3.89e-07	5.52e-06	LOC5570219		uncharacterized LOC5570219			3	NC_035109.1	9502772	9503887	plus	3
LOC5568988	409.599	-1.45036	0.286009	-5.07103	3.96e-07	5.6e-06	LOC5568988	AaeL_AAEL007302, AAEL007302	nose resistant to fluoxetine protein 6	O-acyltransferase like protein|nose resistant to fluoxetine protein 6		3	NC_035109.1	197100702	197235048	minus	12
LOC5575228	377.593	-1.2159	0.239868	-5.06906	4e-07	5.66e-06	LOC5575228	AaeL_AAEL011699, AAEL011699	major royal jelly protein 1	major royal jelly protein 1		1	NC_035107.1	305999815	306066595	minus	5
LOC5576782	507.706	-1.03501	0.204261	-5.06711	4.04e-07	5.71e-06	LOC5576782	AaeL_AAEL012762, AAEL012762, CYP325N2	cytochrome P450 4C1	cytochrome P450 4C1		3	NC_035109.1	111700859	111707836	minus	5
LOC110681423	2539.65	1.28099	0.252843	5.06634	4.06e-07	5.73e-06	LOC110681423		37 kDa salivary gland allergen Aed a 2-like	LOW QUALITY PROTEIN: 37 kDa salivary gland allergen Aed a 2-like		Un	NW_018736546.1	5167	6519	plus	5
LOC5577385	366.694	-0.778215	0.153709	-5.06291	4.13e-07	5.82e-06	LOC5577385	AaeL_AAEL000467, AAEL000467	probable 39S ribosomal protein L49, mitochondrial	probable 39S ribosomal protein L49, mitochondrial|mitochondrial ribosomal protein L49		3	NC_035109.1	187741392	187742222	plus	2
LOC5572716	430.001	-0.838767	0.165839	-5.05771	4.24e-07	5.98e-06	LOC5572716	AaeL_AAEL009986, AAEL009986, AAEL013886, GPRFZ5, GPRFZ9	frizzled	frizzled		3	NC_035109.1	303681419	303806892	minus	5
LOC110679233	18.692	-2.83094	0.560106	-5.0543	4.32e-07	6.08e-06	LOC110679233		uncharacterized LOC110679233			3	NC_035109.1	29042552	29044390	minus	2
LOC5568456	820.993	-1.21386	0.240239	-5.05269	4.36e-07	6.13e-06	LOC5568456	AaeL_AAEL006867, AAEL006867	CCR4-NOT transcription complex subunit 9	CCR4-NOT transcription complex subunit 9		3	NC_035109.1	370293547	370306209	plus	4
LOC5564317	1560.6	-0.61328	0.121541	-5.04588	4.51e-07	6.34e-06	LOC5564317	AaeL_AAEL000568, AAEL000568	26S proteasome non-ATPase regulatory subunit 4	26S proteasome non-ATPase regulatory subunit 4		2	NC_035108.1	147593471	147595680	plus	2
LOC5564953	339.107	-0.840238	0.166618	-5.04291	4.59e-07	6.44e-06	LOC5564953	AaeL_AAEL014666, AAEL012363, AAEL014666	uncharacterized LOC5564953	uncharacterized protein LOC5564953		2	NC_035108.1	111822865	111915693	minus	8
LOC110676147	88.5206	1.98157	0.393236	5.03914	4.68e-07	6.56e-06	LOC110676147		uncharacterized LOC110676147	uncharacterized protein LOC110676147		2	NC_035108.1	155937473	155938165	plus	2
LOC110677202	138.073	-2.72187	0.540159	-5.03902	4.68e-07	6.56e-06	LOC110677202		uncharacterized LOC110677202			2	NC_035108.1	460922056	460924539	plus	2
LOC5573393	562.509	1.33979	0.265983	5.03715	4.73e-07	6.61e-06	LOC5573393	AaeL_AAEL002080, AAEL002080	uncharacterized LOC5573393	uncharacterized protein LOC5573393		2	NC_035108.1	356655410	356663631	minus	5
LOC5572813	464.01	1.81373	0.360095	5.03681	4.73e-07	6.62e-06	LOC5572813	AAEL001892	uncharacterized LOC5572813	uncharacterized protein LOC5572813		2	NC_035108.1	390851380	390852646	plus	2
LOC5578167	26774.4	-0.838032	0.166456	-5.03455	4.79e-07	6.69e-06	LOC5578167		obscurin	LOW QUALITY PROTEIN: obscurin		2	NC_035108.1	28959113	29165738	plus	28
LOC5571618	26.9796	-2.38678	0.47428	-5.03242	4.84e-07	6.76e-06	LOC5571618	AaeL_AAEL009204, AAEL009204	glucose dehydrogenase [FAD, quinone]	glucose dehydrogenase [FAD, quinone]		3	NC_035109.1	390896982	390899668	plus	2
LOC110677952	3047.27	1.08693	0.21607	5.03046	4.89e-07	6.81e-06	LOC110677952		isocitrate dehydrogenase [NADP], mitochondrial-like	isocitrate dehydrogenase [NADP], mitochondrial-like		1	NC_035107.1	146112659	146123017	plus	5
LOC5576561	3047.27	1.08693	0.21607	5.03046	4.89e-07	6.81e-06	LOC5576561		isocitrate dehydrogenase [NADP], mitochondrial	isocitrate dehydrogenase [NADP], mitochondrial		Un	NW_018734976.1	13651	24007	minus	5
LOC5576221	18844.7	1.43368	0.285093	5.02882	4.94e-07	6.87e-06	LOC5576221	AaeL_AAEL002833, AAEL002833, CAT-L1	cathepsin L	cathepsin L		3	NC_035109.1	234963033	235018220	plus	6
LOC5563631	97.4617	-1.46782	0.291976	-5.02718	4.98e-07	6.92e-06	LOC5563631	AaeL_AAEL000098, AAEL000098	extensin-1	extensin-1		3	NC_035109.1	103726063	103830545	plus	4
LOC5564784	563.947	-0.728499	0.145056	-5.02219	5.11e-07	7.09e-06	LOC5564784	AaeL_AAEL004430, AAEL004430	39S ribosomal protein L30, mitochondrial	39S ribosomal protein L30, mitochondrial		3	NC_035109.1	206448340	206477832	minus	3
LOC5564509	17084	1.00617	0.200395	5.02093	5.14e-07	7.13e-06	LOC5564509	AaeL_AAEL004297, AAEL004297	ATP-citrate synthase	ATP-citrate synthase		2	NC_035108.1	293501614	293579011	minus	17
LOC110680896	49.0764	-1.57716	0.314251	-5.01879	5.2e-07	7.21e-06	LOC110680896	AaeL_AAEL000154, AAEL000154	nucleolin-like	nucleolin-like		Un	NW_018735460.1	12429	22169	plus	4
LOC23687769	5150.73	-0.688036	0.137114	-5.01797	5.22e-07	7.23e-06	LOC23687769	AaeL_AAEL017349, AAEL017349	heat shock 70 kDa protein cognate 3	heat shock 70 kDa protein cognate 3		3	NC_035109.1	68614118	68629137	minus	3
LOC5574484	1343.93	-0.653742	0.130304	-5.01705	5.25e-07	7.26e-06	LOC5574484	AaeL_AAEL002401, AAEL002401	proteasome subunit beta type-2	proteasome subunit beta type-2		2	NC_035108.1	302264487	302266655	plus	3
LOC5565095	5792.33	0.587019	0.117044	5.01536	5.29e-07	7.32e-06	LOC5565095	AaeL_AAEL004589, AAEL004589	calcium-binding mitochondrial carrier protein SCaMC-2	calcium-binding mitochondrial carrier protein SCaMC-2		2	NC_035108.1	34223841	34341389	plus	8
LOC5579876	160.672	-1.16783	0.232944	-5.01334	5.35e-07	7.39e-06	LOC5579876	AaeL_AAEL005980, AAEL005980	lipoma HMGIC fusion partner-like 3 protein	lipoma HMGIC fusion partner-like 3 protein		2	NC_035108.1	8054721	8144219	plus	7
LOC5565096	1733.94	0.709583	0.141613	5.01073	5.42e-07	7.48e-06	LOC5565096	AaeL_AAEL004585, AAEL004585	uncharacterized LOC5565096	uncharacterized protein LOC5565096		2	NC_035108.1	34386700	34387191	plus	1
LOC5577763	218.713	3.669	0.732259	5.01052	5.43e-07	7.48e-06	LOC5577763	AaeL_AAEL003286, AAEL003286, AAEL003317	membrane-bound alkaline phosphatase	membrane-bound alkaline phosphatase		3	NC_035109.1	340511335	340513713	minus	3
LOC5566122	415.128	0.763169	0.152369	5.00868	5.48e-07	7.55e-06	LOC5566122	AaeL_AAEL005177, AAEL005177	adenylate cyclase type 2	adenylate cyclase type 2		2	NC_035108.1	331578	339168	plus	16
LOC5568997	209.849	-1.41176	0.281923	-5.00762	5.51e-07	7.58e-06	LOC5568997	AaeL_AAEL007287, AAEL007287	nose resistant to fluoxetine protein 6	nose resistant to fluoxetine protein 6		3	NC_035109.1	196637458	196671982	plus	12
LOC5568281	667.287	-0.88709	0.177155	-5.00742	5.52e-07	7.58e-06	LOC5568281	AaeL_AAEL006707, AAEL006707	leishmanolysin-like peptidase	LOW QUALITY PROTEIN: leishmanolysin-like peptidase		1	NC_035107.1	167415871	167585406	minus	8
LOC5568322	913.199	-0.603449	0.120518	-5.00711	5.53e-07	7.59e-06	LOC5568322	AaeL_AAEL006734, AAEL006734	mitochondrial inner membrane protein OXA1L	mitochondrial inner membrane protein OXA1L		2	NC_035108.1	83658876	83667272	minus	3
LOC5572942	117.548	1.44059	0.287822	5.00515	5.58e-07	7.66e-06	LOC5572942	AaeL_AAEL010154, AAEL010154, CYP4AR2	cytochrome P450 4d2	cytochrome P450 4d2		2	NC_035108.1	380179249	380180990	plus	3
LOC5576013	1126.25	-1.26676	0.253285	-5.00132	5.69e-07	7.8e-06	LOC5576013	AaeL_AAEL012245, AAEL012245	protein obstructor-E	protein obstructor-E		1	NC_035107.1	146979768	147016446	plus	5
LOC5578519	38.7753	-2.22345	0.444852	-4.99817	5.79e-07	7.92e-06	LOC5578519	AaeL_AAEL013722, AAEL013722	partner of bursicon	partner of bursicon		1	NC_035107.1	220028715	220030446	plus	2
LOC5579929	598.054	1.69788	0.339736	4.99766	5.8e-07	7.94e-06	LOC5579929	AaeL_AAEL006805, AAEL006805, CYP9J, CYP9J1, CYP9J2	probable cytochrome P450 9f2	probable cytochrome P450 9f2|cytochrome P450 CYP9J|cytochrome P450 CYP9J1|cytochrome P450 CYP9J2		3	NC_035109.1	368460018	368462540	minus	2
LOC110680966	59.7212	-1.73343	0.346945	-4.99627	5.85e-07	7.99e-06	LOC110680966		zinc finger protein ZXDC-like	zinc finger protein ZXDC-like		Un	NW_018735746.1	4443	23188	minus	3
LOC5570888	63.0075	-1.65585	0.331501	-4.99499	5.88e-07	8.03e-06	LOC5570888	AaeL_AAEL008654, AAEL008654	uncharacterized LOC5570888	uncharacterized protein LOC5570888		3	NC_035109.1	172958315	172971465	minus	3
LOC5569242	1503.44	0.727512	0.145714	4.99274	5.95e-07	8.12e-06	LOC5569242	AaeL_AAEL007489, AAEL007489	synaptic vesicle glycoprotein 2A	synaptic vesicle glycoprotein 2A		1	NC_035107.1	217146148	217304901	minus	11
LOC5577473	20.9522	5.86814	1.17537	4.99261	5.96e-07	8.12e-06	Or31	AaeL_AAEL013217, AAEL013217, GPROR31	odorant receptor 31	odorant receptor 31|odorant receptor 82a		2	NC_035108.1	199640033	199652647	plus	5
LOC5571253	597.821	0.74598	0.149442	4.99176	5.98e-07	8.14e-06	LOC5571253	AaeL_AAEL001566, AAEL001566	tolloid-like protein 1	tolloid-like protein 1		2	NC_035108.1	23378181	23382497	plus	2
LOC110677185	239.021	-0.839551	0.168394	-4.98562	6.18e-07	8.4e-06	LOC110677185		uncharacterized LOC110677185			2	NC_035108.1	453146426	453151796	minus	6
LOC5577894	430.84	-0.782587	0.156986	-4.98508	6.19e-07	8.41e-06	LOC5577894	AaeL_AAEL013410, AAEL013410	transmembrane protein 70 homolog, mitochondrial	transmembrane protein 70 homolog, mitochondrial		2	NC_035108.1	159244847	159245803	minus	2
LOC110680628	941.731	-1.5464	0.310268	-4.98406	6.23e-07	8.45e-06	LOC110680628	AaeL_AAEL015119, AAEL015119	uncharacterized LOC110680628	uncharacterized protein LOC110680628		Un	NW_018735130.1	78584	97274	plus	2
LOC5568557	3699.27	1.27825	0.256561	4.98224	6.29e-07	8.52e-06	LOC5568557	AaeL_AAEL001128, AAEL001128	probable 4-coumarate--CoA ligase 1	probable 4-coumarate--CoA ligase 1		3	NC_035109.1	1707809	1792537	minus	6
LOC5576797	115.789	1.73915	0.349086	4.98201	6.29e-07	8.52e-06	LOC5576797	AaeL_AAEL012782, AAEL012782	serine protease snake	serine protease snake		1	NC_035107.1	290749451	290756819	plus	6
LOC5567341	2760.99	1.26445	0.25384	4.98129	6.32e-07	8.55e-06	LOC5567341	AaeL_AAEL006011, AAEL006007, AAEL006011	serine protease inhibitor dipetalogastin	serine protease inhibitor dipetalogastin|Kazal domain-containing peptide		2	NC_035108.1	472622976	472624070	minus	2
LOC5577470	932.969	0.684087	0.137516	4.9746	6.54e-07	8.84e-06	LOC5577470	AaeL_AAEL013214, AAEL013214	cGMP-dependent protein kinase 1	cGMP-dependent protein kinase 1		2	NC_035108.1	313206966	313254789	plus	8
LOC5565351	738.771	-0.587066	0.118053	-4.97291	6.6e-07	8.91e-06	LOC5565351	AaeL_AAEL004773, AAEL004773	leucine carboxyl methyltransferase 1	leucine carboxyl methyltransferase 1		2	NC_035108.1	290411060	290421755	minus	5
LOC5580122	125.946	-1.3782	0.277206	-4.97175	6.64e-07	8.95e-06	LOC5580122	AaeL_AAEL002438, AAEL002438	protein quiver	protein quiver		1	NC_035107.1	99071539	99073440	minus	3
LOC110680427	799.153	-0.716044	0.144045	-4.97097	6.66e-07	8.98e-06	LOC110680427		serine/threonine-protein kinase 10-like	serine/threonine-protein kinase 10-like		Un	NW_018734799.1	4535	26130	plus	5
LOC5568917	2046.24	-0.742965	0.149532	-4.96861	6.74e-07	9.08e-06	LOC5568917	AaeL_AAEL007216, AAEL007216	elongation of very long chain fatty acids protein AAEL008004	elongation of very long chain fatty acids protein AAEL008004		1	NC_035107.1	267420400	267549682	minus	9
LOC5567052	89.9615	-1.61143	0.324604	-4.96428	6.9e-07	9.27e-06	LOC5567052	AaeL_AAEL005783, AAEL005783	uncharacterized LOC5567052	uncharacterized protein LOC5567052		1	NC_035107.1	121830841	121848667	plus	3
LOC5571393	145.717	6.16021	1.24091	4.96426	6.9e-07	9.27e-06	LOC5571393	AaeL_AAEL009036, AAEL009036	uncharacterized LOC5571393	uncharacterized protein LOC5571393		2	NC_035108.1	101617465	101629526	plus	3
LOC5575730	196.233	-0.936569	0.188767	-4.96151	6.99e-07	9.4e-06	LOC5575730	AaeL_AAEL012037, AAEL012037	sodium-independent sulfate anion transporter	sodium-independent sulfate anion transporter		1	NC_035107.1	209041580	209044025	minus	3
LOC110673980	495.292	1.71714	0.346116	4.96116	7.01e-07	9.4e-06	LOC110673980	AaeL_AAEL010764, AAEL010764	cytosolic 10-formyltetrahydrofolate dehydrogenase-like	cytosolic 10-formyltetrahydrofolate dehydrogenase-like		2	NC_035108.1	304938708	304951350	minus	3
LOC5572696	9643.6	-0.446407	0.0900082	-4.95962	7.06e-07	9.47e-06	LOC5572696	AaeL_AAEL009964, AAEL009964	ATP synthase subunit e, mitochondrial	ATP synthase subunit e, mitochondrial|ATP synthase E chain		2	NC_035108.1	93105548	93106408	plus	3
LOC5573460	5643.37	-0.784708	0.158276	-4.95786	7.13e-07	9.55e-06	LOC5573460	AaeL_AAEL010509, AAEL010509	amphiphysin	amphiphysin		2	NC_035108.1	90738172	90926999	plus	10
LOC5570648	205.6	1.79669	0.36268	4.95393	7.27e-07	9.73e-06	LOC5570648	AaeL_AAEL008468, AAEL008468	cystathionine beta-synthase	cystathionine beta-synthase		1	NC_035107.1	53209221	53239627	plus	5
LOC110677755	438.108	-0.677144	0.136782	-4.95054	7.4e-07	9.9e-06	LOC110677755		uncharacterized LOC110677755			3	NC_035109.1	108109766	108118878	plus	2
LOC5567854	19633.4	1.03255	0.208626	4.94927	7.45e-07	9.94e-06	LOC5567854	AaeL_AAEL006307, AAEL006307	acetyl-CoA carboxylase	acetyl-CoA carboxylase		2	NC_035108.1	141054858	141105830	plus	16
LOC5571598	654.739	0.784127	0.158434	4.94924	7.45e-07	9.94e-06	LOC5571598		mitochondrial inner membrane protein COX18	mitochondrial inner membrane protein COX18		2	NC_035108.1	97388103	97390105	plus	5
LOC5580025	1626.7	0.617614	0.124963	4.94238	7.72e-07	1.03e-05	LOC5580025	AaeL_AAEL009648, AAEL009648, U493_AEDAE	ectopic P granules protein 5 homolog	ectopic P granules protein 5 homolog		1	NC_035107.1	60518107	60594487	plus	10
LOC5572000	1304.5	0.681398	0.137875	4.94212	7.73e-07	1.03e-05	LOC5572000	AaeL_AAEL009486, AAEL009486	bis(5'-adenosyl)-triphosphatase ENPP4	bis(5'-adenosyl)-triphosphatase ENPP4		1	NC_035107.1	98094572	98121478	minus	4
LOC5566878	972.684	0.651034	0.131734	4.94204	7.73e-07	1.03e-05	LOC5566878	AaeL_AAEL000838, AAEL000838	uncharacterized LOC5566878	uncharacterized protein LOC5566878		3	NC_035109.1	120536093	120840788	plus	5
LOC5565621	1975.02	-0.57037	0.115493	-4.93858	7.87e-07	1.05e-05	LOC5565621	AaeL_AAEL010902, AAEL010902, AAEL014902	zinc transporter 1	zinc transporter 1		2	NC_035108.1	108618783	108722968	plus	11
LOC110678898	130.416	-1.47632	0.298954	-4.93829	7.88e-07	1.05e-05	LOC110678898		uncharacterized LOC110678898	uncharacterized protein LOC110678898		1	NC_035107.1	160318533	160535247	minus	4
LOC5570880	579.868	-0.634119	0.128498	-4.93485	8.02e-07	1.06e-05	LOC5570880	AaeL_AAEL008653, AAEL008653	ELMO domain-containing protein 2	ELMO domain-containing protein 2		3	NC_035109.1	172516805	172535739	minus	2
LOC5566081	597.079	-0.709559	0.143921	-4.93021	8.21e-07	1.09e-05	LOC5566081	AaeL_AAEL005162, AAEL005162	39S ribosomal protein L11, mitochondrial	39S ribosomal protein L11, mitochondrial		1	NC_035107.1	168241183	168242055	minus	2
LOC5579192	1532.5	1.69086	0.34332	4.92503	8.43e-07	1.12e-05	LOC5579192	AaeL_AAEL003889, AAEL003889, GNBPB1	beta-1,3-glucan-binding protein	beta-1,3-glucan-binding protein		3	NC_035109.1	85412482	85421308	plus	3
LOC110674786	91.6681	1.62957	0.331054	4.92238	8.55e-07	1.13e-05	LOC110674786		cartilage oligomeric matrix protein-like	cartilage oligomeric matrix protein-like		1	NC_035107.1	21508471	21530418	minus	3
LOC5567768	3883.16	-0.923419	0.187654	-4.92086	8.62e-07	1.14e-05	LOC5567768	AaeL_AAEL009385, AAEL000153, AAEL009385	protein Skeletor	protein Skeletor, isoforms B/C|protein Skeletor, isoforms D/E		1	NC_035107.1	197401924	197466010	plus	9
LOC110678894	809.044	0.923851	0.187774	4.92	8.65e-07	1.14e-05	LOC110678894		uncharacterized LOC110678894			3	NC_035109.1	51610122	51610480	plus	2
LOC5573818	2736.26	0.558186	0.113469	4.91928	8.69e-07	1.15e-05	LOC5573818	AaeL_AAEL010738, AAEL010738, NDAE-A, NDAE-A', NDAE-B, NDAE-C	sodium-driven chloride bicarbonate exchanger	electrogenic sodium bicarbonate cotransporter 1|electroneutral sodium bicarbonate exchanger 1|sodium bicarbonate cotransporter 3|sodium-driven chloride bicarbonate exchanger		2	NC_035108.1	406586616	406802157	minus	22
LOC5570412	676.209	-0.637861	0.129828	-4.9131	8.96e-07	1.18e-05	LOC5570412	AaeL_AAEL008314, AAEL008314, AAEL008318	cadherin-86C	cadherin-86C		1	NC_035107.1	96588231	97237337	minus	16
LOC110678413	43.4439	-1.8874	0.38419	-4.91269	8.98e-07	1.18e-05	LOC110678413		nucleolin-like	nucleolin-like		3	NC_035109.1	6466503	6480508	plus	4
LOC5574197	5923.8	0.979963	0.199584	4.91003	9.11e-07	1.2e-05	LOC5574197	AaeL_AAEL002296, AAEL002296	trifunctional enzyme subunit beta, mitochondrial	trifunctional enzyme subunit beta, mitochondrial		3	NC_035109.1	374095727	374112210	plus	4
LOC5565783	3477.09	-0.535252	0.10903	-4.90922	9.14e-07	1.2e-05	LOC5565783	AaeL_AAEL004985, AAEL004985	peroxisomal biogenesis factor 19	peroxisomal biogenesis factor 19		2	NC_035108.1	281781178	281786192	plus	3
LOC5580168	49686.6	-0.817654	0.166609	-4.90764	9.22e-07	1.21e-05	LOC5580168	AaeL_AAEL002565, AAEL002558, AAEL002565	twitchin	twitchin		1	NC_035107.1	227411157	227506309	plus	29
LOC5564310	79.6528	2.73756	0.557935	4.90659	9.27e-07	1.22e-05	LOC5564310	AaeL_AAEL000566, AAEL000566	uncharacterized LOC5564310	uncharacterized protein LOC5564310		3	NC_035109.1	12403183	12409069	minus	3
LOC5571108	70.9241	-1.54791	0.315526	-4.90581	9.3e-07	1.22e-05	LOC5571108	AaeL_AAEL001524, AAEL001524	ras-related protein Rab-23	ras-related protein Rab-23		3	NC_035109.1	261239102	261399099	plus	3
LOC110674641	17.9889	7.51103	1.53121	4.90528	9.33e-07	1.22e-05	LOC110674641		uncharacterized LOC110674641	uncharacterized protein LOC110674641		1	NC_035107.1	238524629	238525345	minus	2
LOC5568272	593.313	-1.14413	0.233283	-4.90445	9.37e-07	1.23e-05	LOC5568272	AaeL_AAEL006705, AAEL006705	uncharacterized LOC5568272	uncharacterized protein LOC5568272		3	NC_035109.1	352652598	352689793	plus	6
LOC5580189	995.466	-3.92742	0.800817	-4.90426	9.38e-07	1.23e-05	LOC5580189	AaeL_AAEL002564, AAEL002564	uncharacterized LOC5580189	uncharacterized protein LOC5580189		1	NC_035107.1	226652696	226653848	plus	2
LOC5577765	475.266	1.94648	0.397057	4.90226	9.47e-07	1.24e-05	LOC5577765	AaeL_AAEL003309, AAEL003309, AAEL003313	alkaline phosphatase	alkaline phosphatase|uncharacterized protein LOC5577765		3	NC_035109.1	340514382	340542206	plus	4
LOC110678094	22.6186	-2.36928	0.483433	-4.90094	9.54e-07	1.25e-05	LOC110678094		mediator of RNA polymerase II transcription subunit 15-like	mediator of RNA polymerase II transcription subunit 15-like		3	NC_035109.1	86931875	87006061	minus	6
LOC5575117	932.441	0.748786	0.152933	4.89618	9.77e-07	1.27e-05	LOC5575117	AaeL_AAEL000342, AAEL000342, AAEL000349, AAEL000376, HPX4	peroxidasin	peroxidasin		2	NC_035108.1	123291574	123811302	plus	13
LOC5568937	784.192	-0.766345	0.15657	-4.89457	9.85e-07	1.28e-05	LOC5568937	AaeL_AAEL007228, AAEL007228	cysteine protease ATG4B	cysteine protease ATG4B		2	NC_035108.1	421513478	421527848	plus	5
LOC5565229	1048.24	0.65892	0.134666	4.89298	9.93e-07	1.29e-05	LOC5565229	AaeL_AAEL004675, AAEL004675	transcriptional adapter 3	transcriptional adapter 3		3	NC_035109.1	246657945	246669242	plus	5
LOC5565411	886.333	0.594963	0.121601	4.89274	9.94e-07	1.29e-05	LOC5565411	AaeL_AAEL014851, AAEL010020, AAEL014851, MED14	mediator of RNA polymerase II transcription subunit 14	mediator of RNA polymerase II transcription subunit 14|MED14_AEDAE|Mediator complex subunit 14		2	NC_035108.1	110500423	110528688	plus	6
LOC5578934	2717.43	-0.598646	0.12237	-4.89208	9.98e-07	1.3e-05	LOC5578934	AaeL_AAEL003765, AAEL003765	calcium-activated potassium channel slowpoke	calcium-activated potassium channel slowpoke		1	NC_035107.1	248115799	248342783	minus	35
LOC5571053	303.115	5.12038	1.04762	4.88765	1.02e-06	1.32e-05	LOC5571053	AaeL_AAEL008769, AAEL001701, AAEL008769	serine protease SP24D	serine protease SP24D		2	NC_035108.1	87878222	87879212	minus	2
LOC5564146	1680.08	-0.631986	0.129308	-4.88743	1.02e-06	1.33e-05	LOC5564146	AaeL_AAEL014325, AAEL014325	26S proteasome non-ATPase regulatory subunit 12	26S proteasome non-ATPase regulatory subunit 12|26S proteasome regulatory complex subunit RPN5/PSMD12		2	NC_035108.1	120127114	120145174	minus	4
LOC5571549	114.583	1.03765	0.212319	4.8872	1.02e-06	1.33e-05	LOC5571549	AaeL_AAEL009121, AAEL009121, CYP6N9	probable cytochrome P450 6a14	probable cytochrome P450 6a14		2	NC_035108.1	419287877	419289644	plus	2
LOC5573774	2866.28	-0.646888	0.132425	-4.88495	1.03e-06	1.34e-05	LOC5573774	AaeL_AAEL000258, AAEL000258	7-methylguanosine phosphate-specific 5'-nucleotidase	7-methylguanosine phosphate-specific 5'-nucleotidase		3	NC_035109.1	265618282	265636320	plus	4
LOC5578638	33.7582	-2.92573	0.599034	-4.88407	1.04e-06	1.34e-05	LOC5578638	AaeL_AAEL013789, AAEL013789	cuticle protein 5	cuticle protein 5		3	NC_035109.1	311439946	311441446	minus	2
LOC5573843	525.008	0.672979	0.137821	4.88301	1.04e-06	1.35e-05	LOC5573843		uncharacterized LOC5573843	uncharacterized protein LOC5573843		3	NC_035109.1	293465252	293470245	plus	2
LOC5567767	35.6058	-1.96046	0.401538	-4.88239	1.05e-06	1.35e-05	LOC5567767	AaeL_AAEL009378, AAEL009378	putative ankyrin repeat protein RF_0580	uncharacterized protein LOC5567767		1	NC_035107.1	197465891	197467061	minus	2
LOC5578896	1142.95	-0.657202	0.134623	-4.88181	1.05e-06	1.36e-05	LOC5578896	AaeL_AAEL013896, AAEL013896	mothers against decapentaplegic homolog 4	mothers against decapentaplegic homolog 4		3	NC_035109.1	170433498	170463273	plus	9
LOC5569420	559.236	1.12033	0.229657	4.87826	1.07e-06	1.38e-05	LOC5569420	AaeL_AAEL007626, AAEL007626, GNBPA1	gram-negative bacteria-binding protein 1	gram-negative bacteria-binding protein 1		2	NC_035108.1	106723527	106751821	minus	7
LOC5570704	887.064	-0.94069	0.19287	-4.87734	1.08e-06	1.38e-05	LOC5570704	AaeL_AAEL001466, AAEL001466	O-acyltransferase like protein	O-acyltransferase like protein		1	NC_035107.1	111658445	111729101	plus	10
LOC5569335	1998.42	0.880878	0.180656	4.876	1.08e-06	1.39e-05	LOC5569335	AaeL_AAEL007542, AAEL007542	cysteine sulfinic acid decarboxylase	cysteine sulfinic acid decarboxylase		2	NC_035108.1	327117239	327157378	minus	4
LOC110680617	84.5569	1.38048	0.283237	4.87394	1.09e-06	1.41e-05	LOC110680617		uncharacterized LOC110680617			Un	NW_018735118.1	29287	29772	plus	2
LOC110678724	22.8562	3.23472	0.664341	4.86906	1.12e-06	1.44e-05	LOC110678724		uncharacterized LOC110678724			3	NC_035109.1	147276905	147277551	minus	2
LOC23687418	51.7156	-2.397	0.49241	-4.86789	1.13e-06	1.45e-05	LOC23687418	AaeL_AAEL016998, AAEL016998	A disintegrin and metalloproteinase with thrombospondin motifs 16	A disintegrin and metalloproteinase with thrombospondin motifs 16		2	NC_035108.1	259794649	259818811	minus	7
LOC5567650	56.9487	1.50417	0.309278	4.86347	1.15e-06	1.48e-05	LOC5567650	AaeL_AAEL006238, AAEL006238, AAEL006996	uncharacterized LOC5567650	uncharacterized protein LOC5567650		2	NC_035108.1	242324169	242334027	minus	4
LOC5579815	1364.38	-0.690653	0.142048	-4.86212	1.16e-06	1.49e-05	LOC5579815		selenoprotein	selenoprotein		1	NC_035107.1	8638634	8639617	plus	3
LOC5578528	378.484	-1.33236	0.274122	-4.86048	1.17e-06	1.5e-05	LOC5578528	AaeL_AAEL013732, AAEL013732	protein O-mannosyl-transferase 2	protein O-mannosyl-transferase 2		1	NC_035107.1	185710642	185772714	minus	9
LOC5576976	1987.78	-0.706425	0.145535	-4.85397	1.21e-06	1.55e-05	LOC5576976	AaeL_AAEL003063, AAEL003063	semaphorin-1A	semaphorin-1A		2	NC_035108.1	213039708	213370562	minus	11
LOC5575011	4177.36	0.545619	0.112443	4.8524	1.22e-06	1.56e-05	LOC5575011	AaeL_AAEL011564, AAEL011564, CCT	choline-phosphate cytidylyltransferase B	choline-phosphate cytidylyltransferase B|cholinephosphate cytidylyl transferase		3	NC_035109.1	106632007	106738018	minus	8
LOC5572258	989.132	-0.580869	0.119741	-4.85103	1.23e-06	1.57e-05	LOC5572258	AaeL_AAEL009685, AAEL009685	farnesol dehydrogenase-like	farnesol dehydrogenase-like		3	NC_035109.1	209639942	209658467	plus	4
LOC5564994	573.397	-0.707147	0.145781	-4.85074	1.23e-06	1.57e-05	LOC5564994	AaeL_AAEL004527, AAEL004527	28S ribosomal protein S7, mitochondrial	28S ribosomal protein S7, mitochondrial		2	NC_035108.1	310203607	310204537	minus	2
LOC23687865	131.426	1.29684	0.267631	4.84562	1.26e-06	1.61e-05	LOC23687865	AaeL_AAEL017445, AAEL017445, AAEL801209	protein nubbin	alpha-protein kinase 1|protein nubbin		2	NC_035108.1	469341556	469834980	minus	10
LOC5576682	523.569	-0.892112	0.184136	-4.84485	1.27e-06	1.61e-05	LOC5576682	AaeL_AAEL012709, AAEL012709	kelch-like protein 13	kelch-like protein 13		1	NC_035107.1	93054101	93082559	minus	4
LOC5567921	23.323	3.23338	0.667534	4.84377	1.27e-06	1.62e-05	LOC5567921	AaeL_AAEL006382, AAEL006382	trypsin-2	trypsin-2		1	NC_035107.1	101061722	101062760	minus	3
LOC5571097	1066.95	1.23365	0.254737	4.84285	1.28e-06	1.63e-05	LOC5571097	AaeL_AAEL001511, AAEL001511	uncharacterized LOC5571097	uncharacterized protein LOC5571097		3	NC_035109.1	260911384	260923936	plus	3
LOC5571117	743.537	1.04801	0.216873	4.8324	1.35e-06	1.71e-05	LOC5571117	AaeL_AAEL001508, AAEL001508	uncharacterized LOC5571117	uncharacterized protein LOC5571117		3	NC_035109.1	262063301	262064190	plus	3
LOC5574853	67.3133	-1.8691	0.387136	-4.82803	1.38e-06	1.75e-05	LOC5574853	AaeL_AAEL011444, AAEL011444	flexible cuticle protein 12	flexible cuticle protein 12		2	NC_035108.1	37431013	37432379	minus	2
LOC5576244	20540.1	-0.715926	0.14829	-4.82788	1.38e-06	1.75e-05	LOC5576244	AaeL_AAEL002851, AAEL002851, B1t, B4t	tubulin beta-1 chain	tubulin beta-1 chain|beta-1 tubulin|beta-4 tubulin		3	NC_035109.1	233420405	233438299	minus	2
LOC5564389	257.358	-1.38348	0.286736	-4.82491	1.4e-06	1.77e-05	LOC5564389		pupal cuticle protein 20	pupal cuticle protein 20		2	NC_035108.1	366286035	366324568	plus	4
LOC5567691	227.189	-0.805176	0.166895	-4.82445	1.4e-06	1.78e-05	LOC5567691	AaeL_AAEL006283, AAEL006283, GPRDMS	sex peptide receptor	sex peptide receptor		2	NC_035108.1	221829636	221942329	plus	5
LOC110675502	5673.45	0.640541	0.132854	4.82139	1.43e-06	1.8e-05	LOC110675502		shematrin-like protein 1	prisilkin-39-like|shematrin-like protein 1|probable GGY family antimicrobial peptide		2	NC_035108.1	45342897	45362417	minus	3
LOC5571295	367.277	-0.808995	0.167832	-4.82026	1.43e-06	1.81e-05	LOC5571295	AaeL_AAEL001556, AAEL001556	uncharacterized LOC5571295	uncharacterized protein LOC5571295		2	NC_035108.1	20929941	20983150	plus	6
LOC5568234	873.232	-0.567778	0.117819	-4.81909	1.44e-06	1.82e-05	LOC5568234	AaeL_AAEL006677, AAEL006677	phospholipase A-2-activating protein	phospholipase A-2-activating protein		2	NC_035108.1	326317892	326321289	plus	3
LOC5572564	541.943	-0.614195	0.127481	-4.81795	1.45e-06	1.83e-05	LOC5572564	AaeL_AAEL009882, AAEL009882	probable histone-binding protein Caf1	probable histone-binding protein Caf1		3	NC_035109.1	122234123	122236119	minus	3
LOC5577808	520.129	-0.74936	0.155552	-4.81742	1.45e-06	1.83e-05	LOC5577808	AaeL_AAEL013394, AAEL013394	dephospho-CoA kinase domain-containing protein	dephospho-CoA kinase domain-containing protein		3	NC_035109.1	173111771	173122238	minus	4
LOC110679368	21.3057	-2.75242	0.571462	-4.81645	1.46e-06	1.84e-05	LOC110679368		uncharacterized LOC110679368			3	NC_035109.1	136288424	136291558	plus	3
LOC5564164	2348.06	-0.901639	0.18727	-4.81464	1.47e-06	1.85e-05	LOC5564164	AaeL_AAEL004133, AAEL004133	hemicentin-1	hemicentin-1		2	NC_035108.1	255371768	255641251	minus	9
LOC5579359	1936.39	-1.14612	0.238127	-4.81306	1.49e-06	1.87e-05	LOC5579359	AaeL_AAEL015534, AAEL015534	PAX-interacting protein 1	PAX-interacting protein 1		1	NC_035107.1	95807661	95939630	minus	4
LOC5572908	46.2417	-1.6439	0.341575	-4.81271	1.49e-06	1.87e-05	LOC5572908	AaeL_AAEL010126, AAEL010126	Krueppel-like factor luna	Krueppel-like factor luna		2	NC_035108.1	161677689	161821194	minus	3
LOC5567814	778.01	1.56206	0.324608	4.81216	1.49e-06	1.87e-05	LOC5567814	AaeL_AAEL000992, AAEL000992, AAEL001002	sodium-coupled monocarboxylate transporter 1	sodium-coupled monocarboxylate transporter 1		2	NC_035108.1	9540820	9809846	minus	12
LOC5563711	191.793	-0.938534	0.195043	-4.81193	1.49e-06	1.87e-05	LOC5563711	AaeL_AAEL003917, AAEL003917	mitochondrial inner membrane protease subunit 1	mitochondrial inner membrane protease subunit 1		1	NC_035107.1	252522011	252523193	minus	4
LOC110680630	85.3243	-1.18004	0.245249	-4.81162	1.5e-06	1.87e-05	LOC110680630		probable cytochrome P450 301a1, mitochondrial	LOW QUALITY PROTEIN: probable cytochrome P450 301a1, mitochondrial		Un	NW_018735133.1	14418	15841	plus	3
LOC5579901	2054.65	-0.609383	0.126701	-4.8096	1.51e-06	1.89e-05	LOC5579901	AaeL_AAEL001052, AAEL001052	10 kDa heat shock protein, mitochondrial	10 kDa heat shock protein, mitochondrial		3	NC_035109.1	55218179	55219771	minus	2
LOC5574147	788.01	0.76025	0.158084	4.80916	1.52e-06	1.89e-05	LOC5574147	AaeL_AAEL003591, AAEL003591	probable Xaa-Pro aminopeptidase 3	probable Xaa-Pro aminopeptidase 3		1	NC_035107.1	69140478	69157754	plus	3
LOC5566372	102.525	-1.89321	0.393801	-4.80753	1.53e-06	1.91e-05	LOC5566372	AaeL_AAEL005349, AAEL005349	sugar transporter SWEET1	sugar transporter SWEET1		3	NC_035109.1	34711302	34720170	minus	4
LOC5564206	84.653	-1.33396	0.277567	-4.80591	1.54e-06	1.92e-05	LOC5564206	AaeL_AAEL014356, AAEL014356, CTLSE2	uncharacterized LOC5564206	uncharacterized protein LOC5564206		1	NC_035107.1	65875806	66125334	plus	9
LOC23687822	8539.03	-1.02449	0.21337	-4.80148	1.57e-06	1.96e-05	LOC23687822	AaeL_AAEL017402, AAEL017402	adult cuticle protein 1	adult cuticle protein 1		2	NC_035108.1	428865978	428867094	plus	2
LOC5564468	214.693	-0.834133	0.173774	-4.80011	1.59e-06	1.97e-05	LOC5564468	AaeL_AAEL014455, AAEL014455	uncharacterized LOC5564468	uncharacterized protein LOC5564468		2	NC_035108.1	118821822	118823257	plus	4
LOC5565795	4550.21	1.04621	0.217972	4.79976	1.59e-06	1.97e-05	LOC5565795	AaeL_AAEL014980, AAEL003686, AAEL014980, SRPN11	leukocyte elastase inhibitor	leukocyte elastase inhibitor		3	NC_035109.1	65148747	65155128	plus	4
LOC110679853	9.14106	-6.74224	1.40471	-4.79975	1.59e-06	1.97e-05	LOC110679853		uncharacterized LOC110679853			1	NC_035107.1	191131492	191132455	plus	2
LOC5580187	445.999	-1.32659	0.276387	-4.79974	1.59e-06	1.97e-05	LOC5580187	AaeL_AAEL002554, AAEL002554	anosmin-1	anosmin-1		1	NC_035107.1	226701822	226738056	plus	7
LOC5575777	659.646	-0.656976	0.136976	-4.7963	1.62e-06	2.01e-05	LOC5575777	AaeL_AAEL002701, AAEL002701	stromal cell-derived factor 2	stromal cell-derived factor 2|probable ER retained protein		3	NC_035109.1	125563310	125570115	minus	4
LOC5577040	209.438	2.06376	0.430414	4.79482	1.63e-06	2.02e-05	LOC5577040	AaeL_AAEL012956, AAEL012956	limulus clotting factor C	limulus clotting factor C|serine protease 55		1	NC_035107.1	239266375	239268653	plus	6
LOC5573865	128.694	-1.26108	0.26305	-4.79408	1.63e-06	2.02e-05	LOC5573865	AaeL_AAEL010785, AAEL010785	uncharacterized LOC5573865	uncharacterized protein LOC5573865		1	NC_035107.1	178725066	178746706	minus	3
LOC5564315	2052.37	1.13787	0.237357	4.79394	1.64e-06	2.02e-05	LOC5564315		facilitated trehalose transporter Tret1	LOW QUALITY PROTEIN: facilitated trehalose transporter Tret1		Un	NW_018734527.1	33484	47952	plus	5
LOC5574806	90.7	2.24134	0.467546	4.79384	1.64e-06	2.02e-05	LOC5574806	AaeL_AAEL002467, AAEL002467	probable chitinase 10	probable chitinase 10|peritrophin		2	NC_035108.1	78797991	78799643	plus	1
LOC5571268	141.641	-1.16112	0.242218	-4.79368	1.64e-06	2.02e-05	LOC5571268	AaeL_AAEL001584, AAEL001584	uncharacterized LOC5571268	uncharacterized protein LOC5571268		2	NC_035108.1	22685368	22799234	plus	8
LOC110678695	227.146	1.68533	0.351603	4.79328	1.64e-06	2.03e-05	LOC110678695		fibroleukin-like	fibroleukin-like		3	NC_035109.1	353355705	353356789	minus	2
LOC5576299	783.568	-0.628031	0.131052	-4.79223	1.65e-06	2.03e-05	LOC5576299	AaeL_AAEL012451, AAEL012451	BTB/POZ domain-containing protein KCTD5	BTB/POZ domain-containing protein KCTD5		1	NC_035107.1	123248650	123281321	minus	4
LOC5570373	245.063	1.13896	0.237792	4.78973	1.67e-06	2.06e-05	LOC5570373	AaeL_AAEL008259, AAEL008259	uncharacterized LOC5570373	uncharacterized protein LOC5570373		3	NC_035109.1	250476468	250477802	minus	5
LOC5566566	2158.87	0.701682	0.146588	4.78676	1.69e-06	2.09e-05	LOC5566566	AaeL_AAEL005481, AAEL005481	uncharacterized family 31 glucosidase KIAA1161	uncharacterized family 31 glucosidase KIAA1161		3	NC_035109.1	60195775	60264751	plus	11
LOC5576478	3177.39	-0.644223	0.134603	-4.78609	1.7e-06	2.09e-05	LOC5576478	AaeL_AAEL002906, AAEL002906	26S proteasome non-ATPase regulatory subunit 1	26S proteasome non-ATPase regulatory subunit 1		1	NC_035107.1	108399166	108409493	plus	3
LOC5578159	10822.6	0.598043	0.124967	4.78561	1.7e-06	2.1e-05	LOC5578159	AaeL_AAEL013535, AAEL013535	arrestin homolog	arrestin homolog		2	NC_035108.1	246369973	246378923	minus	4
LOC110677027	36.804	1.88317	0.393588	4.78461	1.71e-06	2.1e-05	LOC110677027		uncharacterized LOC110677027			2	NC_035108.1	71407232	71408094	minus	2
LOC5577552	244.298	0.922433	0.192911	4.78165	1.74e-06	2.13e-05	LOC5577552	AaeL_AAEL013262, AAEL013262	acidic endochitinase SP2	acidic endochitinase SP2		1	NC_035107.1	32344860	32345614	minus	1
LOC110681306	390.281	0.648708	0.135691	4.78078	1.75e-06	2.14e-05	LOC110681306		potential E3 ubiquitin-protein ligase ariadne-1-like	potential E3 ubiquitin-protein ligase ariadne-1-like		Un	NW_018736378.1	2532	10725	minus	5
LOC5565804	2822.57	0.767973	0.160647	4.78051	1.75e-06	2.14e-05	LOC5565804	AaeL_AAEL005008, AAEL005008	aquaporin	aquaporin|aquaporin 3		3	NC_035109.1	325331259	325377554	plus	5
LOC5570899	94.7068	-1.91327	0.400312	-4.77944	1.76e-06	2.15e-05	LOC5570899	AaeL_AAEL001494, AAEL001494	eukaryotic translation initiation factor 4 gamma	eukaryotic translation initiation factor 4 gamma		2	NC_035108.1	263212003	263453338	minus	6
LOC5572917	103.777	1.51675	0.31736	4.77926	1.76e-06	2.15e-05	LOC5572917	AaeL_AAEL010132, AAEL010132	leucine-rich repeat-containing protein 15	leucine-rich repeat-containing protein 15		2	NC_035108.1	161633919	161635695	minus	2
LOC5569427	1878.94	0.647336	0.135529	4.77637	1.78e-06	2.18e-05	LOC5569427	AaeL_AAEL007624, AAEL007624, AAEL010996, REL2	nuclear factor NF-kappa-B p110 subunit	nuclear factor NF-kappa-B p110 subunit		2	NC_035108.1	107002855	107084023	minus	10
LOC5574813	1044.28	-0.799255	0.167345	-4.77609	1.79e-06	2.18e-05	LOC5574813	AaeL_AAEL002474, AAEL002474	transcription factor Ken 2	transcription factor Ken 2|putative transcription factor ken 1		3	NC_035109.1	338431132	338606996	minus	9
LOC5572986	14553	-0.705694	0.147773	-4.77552	1.79e-06	2.19e-05	LOC5572986	AaeL_AAEL001928, AAEL001928, ACT-1, ACT1_AEDAE, Aaeact-1, actin	actin-1	actin-1		3	NC_035109.1	227526858	227530378	minus	2
LOC5569378	1049.82	-0.843971	0.176766	-4.7745	1.8e-06	2.2e-05	LOC5569378	AaeL_AAEL007563, AAEL007563, DUOX	dual oxidase	dual oxidase		2	NC_035108.1	248163088	248356521	plus	18
LOC5571703	684.098	-0.619256	0.12974	-4.77307	1.81e-06	2.21e-05	LOC5571703	AaeL_AAEL009217, AAEL009217	28S ribosomal protein S35, mitochondrial	28S ribosomal protein S35, mitochondrial		2	NC_035108.1	112608506	112610302	minus	3
LOC5566746	195.434	0.818182	0.171479	4.77133	1.83e-06	2.23e-05	LOC5566746	AaeL_AAEL005615, AAEL005615	uncharacterized LOC5566746	uncharacterized protein LOC5566746		1	NC_035107.1	73367197	73399843	minus	3
LOC5577732	4914.54	-1.1501	0.241134	-4.76954	1.85e-06	2.25e-05	LOC5577732	AaeL_AAEL013367, AAEL013367	mucin-2	mucin-2|mucin-5AC		2	NC_035108.1	323288657	323896767	plus	14
LOC5569206	107.583	1.42282	0.29834	4.76911	1.85e-06	2.25e-05	LOC5569206	AaeL_AAEL007455, AAEL007455	cartilage oligomeric matrix protein	cartilage oligomeric matrix protein		1	NC_035107.1	46020542	46022096	plus	4
LOC5565824	399.082	-0.69266	0.145325	-4.76628	1.88e-06	2.28e-05	LOC5565824	AaeL_AAEL012411, AAEL012411	uncharacterized LOC5565824	uncharacterized protein LOC5565824		3	NC_035109.1	290357527	290366790	plus	2
LOC5576254	399.082	-0.69266	0.145325	-4.76628	1.88e-06	2.28e-05	LOC5576254	AaeL_AAEL012408, AAEL012408	39S ribosomal protein L53, mitochondrial	39S ribosomal protein L53, mitochondrial		3	NC_035109.1	290357515	290366787	plus	2
LOC110677663	66.9556	-1.45514	0.305333	-4.76576	1.88e-06	2.28e-05	LOC110677663		uncharacterized LOC110677663	uncharacterized protein LOC110677663		3	NC_035109.1	44794534	44795465	minus	2
LOC5569397	748.584	-0.759815	0.159456	-4.76504	1.89e-06	2.29e-05	LOC5569397	AaeL_AAEL007603, AAEL007603	general odorant-binding protein 56d	general odorant-binding protein 56d|odorant-binding protein-related protein		3	NC_035109.1	18109419	18110685	plus	3
LOC5572723	810.893	0.749542	0.157315	4.76459	1.89e-06	2.29e-05	LOC5572723	AaeL_AAEL009991, AAEL009991	myosin-IIIb	myosin-IIIb		3	NC_035109.1	286966261	287362955	minus	20
LOC5566934	618.118	0.653266	0.137124	4.76406	1.9e-06	2.29e-05	LOC5566934	AaeL_AAEL005706, AAEL005706	hormone-sensitive lipase	hormone-sensitive lipase		3	NC_035109.1	115465516	115478449	plus	6
LOC5579424	99.7232	2.51875	0.528779	4.76334	1.9e-06	2.3e-05	LOC5579424	AaeL_AAEL015451, AAEL015451	uncharacterized LOC5579424	uncharacterized protein LOC5579424		1	NC_035107.1	107549742	107550499	plus	2
LOC5576917	1306.82	-0.750622	0.157607	-4.76262	1.91e-06	2.31e-05	LOC5576917	AaeL_AAEL012860, AAEL012860	uncharacterized LOC5576917	uncharacterized protein LOC5576917		1	NC_035107.1	222074056	222104245	minus	3
LOC5569090	301.512	-0.801333	0.168274	-4.76208	1.92e-06	2.31e-05	LOC5569090	AaeL_AAEL007351, AAEL007351	uncharacterized LOC5569090	uncharacterized protein LOC5569090		3	NC_035109.1	123149913	123150881	minus	2
LOC5565278	571.685	0.770857	0.16189	4.76161	1.92e-06	2.31e-05	LOC5565278	AaeL_AAEL014792, AAEL012182, AAEL012186, AAEL014792, AAEL015181	phosphatase and actin regulator 4	phosphatase and actin regulator 4		2	NC_035108.1	187400436	187957674	plus	18
LOC5574092	271.991	0.860714	0.18077	4.76138	1.92e-06	2.31e-05	LOC5574092	AaeL_AAEL002267, AAEL002267	uncharacterized LOC5574092	uncharacterized protein LOC5574092		2	NC_035108.1	31291598	31300021	plus	5
LOC5574407	1247.15	0.629019	0.132125	4.76079	1.93e-06	2.32e-05	LOC5574407	AaeL_AAEL011133, AAEL011133	protein app1	protein app1		3	NC_035109.1	38024898	38125599	plus	5
LOC5568002	5260.58	0.682299	0.143468	4.75575	1.98e-06	2.38e-05	LOC5568002	AaeL_AAEL006439, AAEL006439	dual specificity protein phosphatase 3	dual specificity protein phosphatase 3		2	NC_035108.1	439551890	439677921	minus	9
LOC5575012	2175.48	-0.741778	0.155999	-4.75503	1.98e-06	2.38e-05	LOC5575012	AaeL_AAEL011567, AAEL011567	probable protein phosphatase 2C T23F11.1	probable protein phosphatase 2C T23F11.1		3	NC_035109.1	106829739	106875793	plus	3
LOC110676886	26.4087	-2.06596	0.434821	-4.75129	2.02e-06	2.42e-05	LOC110676886		uncharacterized LOC110676886	uncharacterized protein LOC110676886		2	NC_035108.1	359708237	359709163	minus	3
LOC5572395	608.352	1.03281	0.217537	4.74773	2.06e-06	2.47e-05	LOC5572395	AaeL_AAEL009775, AAEL009775	rapamycin-insensitive companion of mTOR	rapamycin-insensitive companion of mTOR		1	NC_035107.1	66871202	66962271	minus	9
LOC5575865	368.139	0.684754	0.144233	4.74756	2.06e-06	2.47e-05	LOC5575865	AaeL_AAEL012135, AAEL012135, GALE2	32 kDa beta-galactoside-binding lectin lec-3	32 kDa beta-galactoside-binding lectin lec-3		1	NC_035107.1	142312479	142327812	minus	6
LOC5569031	819.108	-0.846578	0.178336	-4.7471	2.06e-06	2.47e-05	LOC5569031	AaeL_AAEL014165, AAEL014164, AAEL014165	PQ-loop repeat-containing protein 1	PQ-loop repeat-containing protein 1		2	NC_035108.1	345728216	345823316	minus	7
LOC5573776	1537.08	0.559708	0.117913	4.74681	2.07e-06	2.47e-05	LOC5573776	AaeL_AAEL000271, AAEL000271	gamma-glutamyl hydrolase	gamma-glutamyl hydrolase		2	NC_035108.1	75421101	75429020	plus	4
LOC5564750	1091.77	1.14006	0.240176	4.74676	2.07e-06	2.47e-05	LOC5564750	AaeL_AAEL006798, AAEL006798, CYP9J10	probable cytochrome P450 9f2	probable cytochrome P450 9f2|cytochrome P450 9J10		3	NC_035109.1	368502058	368504167	plus	3
LOC5578517	403.218	0.746406	0.157251	4.7466	2.07e-06	2.47e-05	LOC5578517	AaeL_AAEL013726, AAEL013724, AAEL013726	uncharacterized LOC5578517	uncharacterized protein LOC5578517		1	NC_035107.1	220037348	220103618	minus	6
LOC5568150	1136.41	0.667872	0.140779	4.7441	2.09e-06	2.5e-05	LOC5568150	AaeL_AAEL006577, AAEL006577	asparagine--tRNA ligase, cytoplasmic	asparagine--tRNA ligase, cytoplasmic		3	NC_035109.1	44737675	44757365	plus	3
LOC5565327	363.427	0.69127	0.14576	4.74251	2.11e-06	2.52e-05	LOC5565327	AaeL_AAEL004719, AAEL004719	uncharacterized LOC5565327	uncharacterized protein LOC5565327		2	NC_035108.1	377400862	377623279	minus	8
LOC5574799	6719.34	-0.786416	0.165878	-4.74094	2.13e-06	2.53e-05	LOC5574799	AaeL_AAEL002487, AAEL002487	sestrin homolog	sestrin homolog|PA26-T3 nuclear protein-like protein		2	NC_035108.1	78004127	78171048	plus	8
LOC110681545	142.541	-1.72859	0.364641	-4.74053	2.13e-06	2.53e-05	LOC110681545	AaeL_AAEL010886, AAEL010886	carbonic anhydrase 13-like	carbonic anhydrase 13-like		1	NC_035107.1	218145754	218164235	plus	2
LOC5574051	142.541	-1.72859	0.364641	-4.74053	2.13e-06	2.53e-05	LOC5574051		carbonic anhydrase 13	carbonic anhydrase 13		Un	NW_018735060.1	5820	24311	minus	2
LOC5571971	6251.34	5.84674	1.2335	4.73995	2.14e-06	2.54e-05	LOC5571971	AaeL_AAEL009451, AAEL009451	actin, muscle-type A2	actin, muscle-type A2|muscle-specific actin 3		3	NC_035109.1	321271085	321274464	plus	3
LOC5569563	289.484	-1.08539	0.229015	-4.7394	2.14e-06	2.54e-05	LOC5569563	AaeL_AAEL007750, AAEL007750	nucleoside diphosphate-linked moiety X motif 8	nucleoside diphosphate-linked moiety X motif 8		1	NC_035107.1	71677698	71678673	plus	2
LOC5570587	1194.22	0.604607	0.127627	4.73731	2.17e-06	2.57e-05	LOC5570587	AaeL_AAEL008397, AAEL008397, GPXH2, GPx	probable glutathione peroxidase 2	probable glutathione peroxidase 2|glutathione peroxidase		1	NC_035107.1	93505534	93531230	minus	4
LOC5579849	213.008	-1.3439	0.283766	-4.73594	2.18e-06	2.58e-05	LOC5579849	AaeL_AAEL005850, AAEL005850, hr4	hormone receptor 4	hormone receptor 4|hormone receptor-like in 4		3	NC_035109.1	218937266	219454745	minus	12
LOC5571832	27874.6	-0.652078	0.137692	-4.73577	2.18e-06	2.58e-05	LOC5571832	AaeL_AAEL001673, AAEL001673, act-6	actin, muscle	actin, muscle|actin 6|muscle-specific actin 2		2	NC_035108.1	87079769	87083856	minus	3
LOC5576909	555.09	1.5374	0.324681	4.73512	2.19e-06	2.59e-05	LOC5576909	AaeL_AAEL012856, AAEL012856	uncharacterized LOC5576909	uncharacterized protein LOC5576909		3	NC_035109.1	339240504	339241235	plus	1
LOC5576892	391.844	-1.53658	0.324584	-4.73398	2.2e-06	2.6e-05	LOC5576892		uncharacterized LOC5576892			1	NC_035107.1	129322036	129322574	minus	3
LOC5570005	365.075	-0.748243	0.158142	-4.73145	2.23e-06	2.63e-05	LOC5570005	AaeL_AAEL000188, AAEL000188	elongation of very long chain fatty acids protein 7	elongation of very long chain fatty acids protein 7		3	NC_035109.1	109426017	109448467	minus	5
LOC5575074	943.504	0.616904	0.130396	4.731	2.23e-06	2.64e-05	LOC5575074	AaeL_AAEL011639, AAEL011639	WAP, Kazal, immunoglobulin, Kunitz and NTR domain-containing protein 2	WAP, Kazal, immunoglobulin, Kunitz and NTR domain-containing protein 2		3	NC_035109.1	281478205	281479142	plus	4
LOC5573051	148.365	1.03193	0.21826	4.72797	2.27e-06	2.67e-05	LOC5573051	AaeL_AAEL010220, AAEL010220, AAEL010806	diamine acetyltransferase 2	diamine acetyltransferase 2		3	NC_035109.1	156846568	156881471	minus	4
LOC5573705	1058.51	-0.672054	0.142201	-4.72608	2.29e-06	2.7e-05	LOC5573705	AaeL_AAEL010691, AAEL010691, RNR2	ribonucleoside-diphosphate reductase subunit M2	ribonucleoside-diphosphate reductase subunit M2|ribonucleotide reductase 2		2	NC_035108.1	176242019	176262142	plus	6
LOC5579938	103.39	1.49589	0.316532	4.72586	2.29e-06	2.7e-05	LOC5579938	AaeL_AAEL006807, AAEL006807	atrial natriuretic peptide receptor 3	atrial natriuretic peptide receptor 3		3	NC_035109.1	169807548	169946091	minus	6
LOC5572434	137.085	4.27178	0.90412	4.72479	2.3e-06	2.71e-05	LOC5572434	AaeL_AAEL001820, AAEL001820	uncharacterized LOC5572434	uncharacterized protein LOC5572434		2	NC_035108.1	374460453	374461823	plus	3
LOC5576552	411.68	-0.717527	0.151873	-4.72451	2.31e-06	2.71e-05	LOC5576552	AaeL_AAEL012610, AAEL012610	uncharacterized LOC5576552	uncharacterized protein LOC5576552|hypothetical conserved protein		2	NC_035108.1	122033927	122035939	plus	3
LOC110680290	172.412	1.57242	0.332884	4.72361	2.32e-06	2.72e-05	LOC110680290		uncharacterized LOC110680290	uncharacterized protein LOC110680290		Un	NW_018734587.1	27577	34069	minus	7
LOC110675665	46.1406	1.94576	0.412042	4.72223	2.33e-06	2.74e-05	LOC110675665		differentially expressed in FDCP 8 homolog	differentially expressed in FDCP 8 homolog		2	NC_035108.1	75979586	75990992	minus	5
LOC5574180	754.956	-0.563589	0.119364	-4.72158	2.34e-06	2.74e-05	LOC5574180	AaeL_AAEL002304, AAEL002304	delta-aminolevulinic acid dehydratase	delta-aminolevulinic acid dehydratase|delta-aminolevulinate dehydratase		3	NC_035109.1	375635228	375648627	plus	4
LOC5575504	15475.5	-0.933305	0.197831	-4.71768	2.39e-06	2.79e-05	LOC5575504	AaeL_AAEL011890, AAEL011890	uncharacterized LOC5575504	uncharacterized protein LOC5575504		2	NC_035108.1	396104484	396153685	plus	5
LOC5565431	14.7185	-4.96214	1.05239	-4.71511	2.42e-06	2.83e-05	LOC5565431	AaeL_AAEL000665, AAEL000665	cuticle protein 19	cuticle protein 19		3	NC_035109.1	392307124	392307779	minus	2
LOC5578065	170.759	2.05742	0.436442	4.71407	2.43e-06	2.84e-05	LOC5578065	AaeL_AAEL013492, AAEL013492, PO5, PPO5	phenoloxidase 2	phenoloxidase 2|prophenoloxidase 5		2	NC_035108.1	199300303	199314209	minus	6
LOC5565728	283.602	0.878938	0.186457	4.71388	2.43e-06	2.84e-05	LOC5565728	AaeL_AAEL004941, AAEL004941, CYP6AK1	probable cytochrome P450 6g2	probable cytochrome P450 6g2		3	NC_035109.1	323189211	323207072	minus	7
LOC110677782	30.6624	-2.03248	0.431975	-4.70509	2.54e-06	2.96e-05	LOC110677782		uncharacterized LOC110677782	uncharacterized protein LOC110677782		3	NC_035109.1	143529362	143536804	minus	2
LOC5578909	193.19	1.60021	0.340385	4.70119	2.59e-06	3.02e-05	LOC5578909	AaeL_AAEL013911, AAEL005296, AAEL013911	fatty acyl-CoA reductase wat	fatty acyl-CoA reductase wat		3	NC_035109.1	309474251	309489769	minus	5
LOC5570678	1284.67	1.09448	0.232898	4.69938	2.61e-06	3.04e-05	LOC5570678	AaeL_AAEL008473, AAEL008473	Golgi-associated plant pathogenesis-related protein 1	Golgi-associated plant pathogenesis-related protein 1		2	NC_035108.1	19337484	19339403	plus	4
LOC5568233	728.316	0.601181	0.127981	4.69743	2.63e-06	3.07e-05	LOC5568233	AaeL_AAEL006667, AAEL006667	ethanolaminephosphotransferase 1	ethanolaminephosphotransferase 1		2	NC_035108.1	326545104	326625053	minus	10
LOC5578208	3964.81	1.30546	0.277936	4.69699	2.64e-06	3.07e-05	LOC5578208	AaeL_AAEL003467, AAEL003467	27 kDa hemolymph protein	27 kDa hemolymph protein		2	NC_035108.1	15086134	15087582	minus	5
LOC5574518	1172.28	0.771763	0.164338	4.69618	2.65e-06	3.08e-05	LOC5574518	AaeL_AAEL011187, AAEL011187	putative U5 small nuclear ribonucleoprotein 200 kDa helicase	putative U5 small nuclear ribonucleoprotein 200 kDa helicase		3	NC_035109.1	51327401	51372479	plus	6
LOC110675926	127.412	-1.09484	0.23332	-4.69246	2.7e-06	3.14e-05	LOC110675926		putative leucine-rich repeat-containing protein DDB_G0290503	putative leucine-rich repeat-containing protein DDB_G0290503		2	NC_035108.1	112551062	112567279	plus	10
LOC5576357	864.06	0.591933	0.126237	4.68906	2.74e-06	3.19e-05	LOC5576357	AaeL_AAEL002856, AAEL002856	protein C3orf33 homolog	protein C3orf33 homolog		1	NC_035107.1	255671159	255692920	minus	5
LOC110676948	79.7552	-1.68321	0.359213	-4.68582	2.79e-06	3.23e-05	LOC110676948		skin secretory protein xP2	skin secretory protein xP2		2	NC_035108.1	386731262	386733266	plus	2
LOC5566596	7971.4	-0.464344	0.0991286	-4.68426	2.81e-06	3.26e-05	LOC5566596	AaeL_AAEL000758, AAEL000758	ubiquitin-like modifier-activating enzyme 1	LOW QUALITY PROTEIN: ubiquitin-like modifier-activating enzyme 1		3	NC_035109.1	244988789	245009918	minus	6
LOC5572845	978.253	-0.499127	0.106589	-4.68271	2.83e-06	3.28e-05	LOC5572845	AaeL_AAEL010057, AAEL010057	hsp90 co-chaperone Cdc37	hsp90 co-chaperone Cdc37		3	NC_035109.1	11187509	11205606	plus	5
LOC5580229	857.365	-0.648958	0.138593	-4.68245	2.83e-06	3.28e-05	LOC5580229	AaeL_AAEL012208, AAEL012208	uncharacterized LOC5580229	uncharacterized protein LOC5580229		1	NC_035107.1	160650516	160691848	plus	3
LOC5564929	455.275	-0.749774	0.160126	-4.68239	2.84e-06	3.28e-05	LOC5564929	AaeL_AAEL004488, AAEL004488	uncharacterized LOC5564929	uncharacterized protein LOC5564929		2	NC_035108.1	452225387	452229277	minus	2
LOC110675810	693.676	0.583104	0.124593	4.68006	2.87e-06	3.31e-05	LOC110675810	AaeL_AAEL009183, AAEL009183	mitochondrial inner membrane protein COX18	mitochondrial inner membrane protein COX18		2	NC_035108.1	97366284	97368282	plus	5
LOC110676361	14.4546	-4.51598	0.965032	-4.67962	2.87e-06	3.32e-05	LOC110676361		uncharacterized LOC110676361			2	NC_035108.1	213063764	213070493	plus	2
LOC110678888	259.909	1.13874	0.243379	4.67889	2.88e-06	3.33e-05	LOC110678888		uncharacterized LOC110678888	uncharacterized protein LOC110678888		3	NC_035109.1	250492011	250493371	minus	5
LOC5578894	322.834	0.813554	0.173903	4.6782	2.89e-06	3.34e-05	LOC5578894	AaeL_AAEL013900, AAEL013900	probable 3',5'-cyclic phosphodiesterase pde-5	probable 3',5'-cyclic phosphodiesterase pde-5		2	NC_035108.1	232889576	232928677	plus	8
LOC5563952	675.385	0.883462	0.188883	4.6773	2.91e-06	3.35e-05	LOC5563952	AaeL_AAEL004022, AAEL004022	carboxylesterase 1F	carboxylesterase 1F|putative carboxylesterase		3	NC_035109.1	165968540	165970751	minus	2
LOC110674116	924.736	-0.951048	0.203553	-4.67223	2.98e-06	3.43e-05	LOC110674116		uncharacterized LOC110674116			1	NC_035107.1	270367684	270377117	plus	2
LOC5572993	1422.79	-0.735714	0.157496	-4.67132	2.99e-06	3.44e-05	LOC5572993	AaeL_AAEL001920, AAEL001920	protein msta	protein msta		3	NC_035109.1	226961390	226999308	plus	5
LOC5569684	425.301	1.11671	0.23924	4.66772	3.05e-06	3.5e-05	LOC5569684	AaeL_AAEL007830, AAEL007830, CYP4H29	probable cytochrome P450 4d14	cytochrome P450 4d1|probable cytochrome P450 4d14		1	NC_035107.1	103250085	103263310	plus	3
LOC5575715	11798.3	-0.399057	0.0855184	-4.66633	3.07e-06	3.52e-05	LOC5575715	AaeL_AAEL012026, AAEL012026	protein krasavietz	protein krasavietz|elongation initiation factor 5C		3	NC_035109.1	147316979	147342091	plus	11
LOC5569222	2555.22	0.592666	0.127024	4.66577	3.07e-06	3.53e-05	LOC5569222	AaeL_AAEL015549, AAEL007494, AAEL015549	calcineurin B homologous protein 1	calcineurin B homologous protein 1		1	NC_035107.1	216391481	216399735	plus	2
LOC5575718	9241.99	0.481589	0.103222	4.66555	3.08e-06	3.53e-05	LOC5575718	AaeL_AAEL012035, AAEL012035	V-type proton ATPase subunit E	V-type proton ATPase subunit E|vacuolar ATP synthase subunit E		3	NC_035109.1	147280362	147291459	plus	6
LOC5576033	316.559	0.862763	0.185236	4.65763	3.2e-06	3.66e-05	LOC5576033	AaeL_AAEL012261, AAEL012261, NARF_AEDAE	probable cytosolic Fe-S cluster assembly factor AAEL012261	probable cytosolic Fe-S cluster assembly factor AAEL012261		2	NC_035108.1	384431502	384433339	plus	5
LOC5570822	1250.35	0.728594	0.156467	4.65653	3.22e-06	3.68e-05	LOC5570822	AaeL_AAEL008610, AAEL008610	unconventional myosin-VIIa	myosin-VIIa-like|unconventional myosin-VIIa		2	NC_035108.1	362973565	362999379	plus	13
LOC5576988	6215.62	-0.787216	0.169123	-4.65469	3.24e-06	3.71e-05	LOC5576988	AaeL_AAEL003067, AAEL003067	merozoite surface antigen 2, allelic form 2	merozoite surface antigen 2, allelic form 2|uncharacterized protein LOC5576988		2	NC_035108.1	212558899	212593410	minus	7
LOC5575328	1690.37	0.830382	0.178399	4.65462	3.25e-06	3.71e-05	LOC5575328	AaeL_AAEL002629, AAEL002629	tryptase	tryptase		3	NC_035109.1	256697857	256713410	plus	5
LOC5565972	38.5458	2.30015	0.494558	4.65092	3.3e-06	3.77e-05	LOC5565972	AaeL_AAEL015020, AAEL015020	myrosinase 1	myrosinase 1		2	NC_035108.1	171274265	171276179	minus	4
LOC110674017	126.206	-0.951279	0.204552	-4.65056	3.31e-06	3.78e-05	LOC110674017		polyprenol reductase-like	LOW QUALITY PROTEIN: polyprenol reductase-like		2	NC_035108.1	16785978	16787866	minus	2
LOC5570918	131.297	1.20184	0.258476	4.64972	3.32e-06	3.79e-05	LOC5570918	AaeL_AAEL001498, AAEL001498	uncharacterized LOC5570918	uncharacterized protein LOC5570918		2	NC_035108.1	262226727	262228390	minus	2
LOC5567156	1244.6	-0.489853	0.105359	-4.64938	3.33e-06	3.79e-05	LOC5567156	AaeL_AAEL005902, AAEL005902	protein CLEC16A	protein CLEC16A		3	NC_035109.1	173951647	173970389	minus	11
LOC5575451	103.166	1.08215	0.232815	4.64812	3.35e-06	3.81e-05	LOC5575451	AaeL_AAEL002633, AAEL002633, CYP9J31	probable cytochrome P450 9f2	probable cytochrome P450 9f2		2	NC_035108.1	245508241	245510667	minus	3
LOC5575270	720.547	0.909344	0.195676	4.6472	3.36e-06	3.83e-05	LOC5575270	AaeL_AAEL011740, AAEL011740, AAEL014894	uncharacterized LOC5575270	uncharacterized protein LOC5575270		3	NC_035109.1	290922699	290964125	minus	4
LOC5572618	67.3723	1.47109	0.316699	4.64507	3.4e-06	3.86e-05	LOC5572618	AaeL_AAEL009945, AAEL009945	uncharacterized LOC5572618	uncharacterized protein LOC5572618		2	NC_035108.1	333910685	333914657	plus	2
LOC5565080	318.409	0.911526	0.196356	4.64221	3.45e-06	3.91e-05	LOC5565080	AaeL_AAEL009928, AAEL009928, AAEL014718	leucine-rich repeat protein soc-2 homolog	leucine-rich repeat protein soc-2 homolog		1	NC_035107.1	307494593	307531352	plus	5
LOC110677076	69.3333	1.80006	0.387811	4.6416	3.46e-06	3.92e-05	LOC110677076		uncharacterized LOC110677076	uncharacterized protein LOC110677076		2	NC_035108.1	429357978	429358655	plus	1
LOC110680435	193.582	-0.925124	0.199317	-4.64147	3.46e-06	3.92e-05	LOC110680435		uncharacterized LOC110680435			Un	NW_018734820.1	54021	55347	plus	2
LOC5574816	1190.47	0.621263	0.133944	4.63824	3.51e-06	3.98e-05	LOC5574816	AaeL_AAEL002464, AAEL002464	V-type proton ATPase subunit F	V-type proton ATPase subunit F|V-ATPase 14 kDa subunit|V-ATPase subunit F|Vacuolar proton pump subunit F|vacuolar ATP synthase subunit F		3	NC_035109.1	338190478	338191479	plus	5
LOC23687412	683.606	-1.21373	0.261698	-4.63791	3.52e-06	3.98e-05	LOC23687412	AaeL_AAEL016992, AAEL016992, lac1	laccase-1	laccase-1|laccase-4|laccase-like multicopper oxidase 1		2	NC_035108.1	133740815	134170366	plus	13
LOC5580013	376.753	-0.917616	0.19792	-4.6363	3.55e-06	4.01e-05	LOC5580013	AaeL_AAEL009640, AAEL009640	leucine zipper putative tumor suppressor 3	leucine zipper putative tumor suppressor 3		1	NC_035107.1	222273223	222556267	plus	10
LOC5571220	476.017	-0.982335	0.211913	-4.63557	3.56e-06	4.02e-05	LOC5571220	AaeL_AAEL008906, AAEL008906	protein ecdysoneless	protein ecdysoneless		2	NC_035108.1	12704649	12708064	plus	3
LOC5565696	114.352	1.20937	0.260899	4.63541	3.56e-06	4.02e-05	LOC5565696	AaeL_AAEL004935, AAEL004935	neuronal acetylcholine receptor subunit alpha-5	neuronal acetylcholine receptor subunit alpha-5		2	NC_035108.1	260847547	260852332	plus	8
LOC5566457	1634.72	0.993118	0.214266	4.63498	3.57e-06	4.03e-05	LOC5566457	AaeL_AAEL005428, AAEL005428	probable salivary secreted peptide	probable salivary secreted peptide		1	NC_035107.1	247774812	247776051	minus	2
LOC5565387	1734.05	-0.606476	0.13092	-4.63243	3.61e-06	4.07e-05	LOC5565387	AaeL_AAEL004743, AAEL004743	multidrug resistance-associated protein 1	multidrug resistance-associated protein 1		2	NC_035108.1	289194273	289251024	plus	22
LOC110676417	603.959	-0.653202	0.141125	-4.62855	3.68e-06	4.15e-05	LOC110676417		39S ribosomal protein L52, mitochondrial	39S ribosomal protein L52, mitochondrial|mitochondrial ribosomal protein L52		2	NC_035108.1	227824420	227857213	plus	3
LOC110677953	14.2498	4.72703	1.02155	4.62734	3.7e-06	4.17e-05	LOC110677953		uncharacterized LOC110677953			3	NC_035109.1	33204871	33205287	plus	2
LOC5571503	502.674	-0.900519	0.194638	-4.62663	3.72e-06	4.18e-05	LOC5571503	AaeL_AAEL001625, AAEL001625	mpv17-like protein	mpv17-like protein		1	NC_035107.1	138045731	138052574	minus	4
LOC5576100	1192.21	-0.592764	0.128208	-4.62345	3.77e-06	4.24e-05	LOC5576100	AaeL_AAEL002789, AAEL002789	26S proteasome non-ATPase regulatory subunit 8	26S proteasome non-ATPase regulatory subunit 8|26S proteasome regulatory complex subunit RPN12/PSMD8		3	NC_035109.1	129324813	129341615	plus	3
LOC5575049	1834.1	0.638104	0.13816	4.61858	3.86e-06	4.34e-05	LOC5575049	AaeL_AAEL011594, AAEL011594	uncharacterized LOC5575049	uncharacterized protein LOC5575049		3	NC_035109.1	192236673	192273347	minus	8
LOC5574170	2114.83	1.0302	0.223169	4.61623	3.91e-06	4.38e-05	LOC5574170	AaeL_AAEL002301, AAEL002301	tryptase	tryptase		3	NC_035109.1	375997195	376016979	minus	5
LOC5574855	65.7232	-1.98647	0.430397	-4.61543	3.92e-06	4.4e-05	LOC5574855	AaeL_AAEL011458, AAEL011458	cuticle protein 19.8	cuticle protein 19.8		2	NC_035108.1	187028726	187030014	minus	1
LOC5576419	2349.51	-0.615618	0.133389	-4.61519	3.93e-06	4.4e-05	LOC5576419	AaeL_AAEL012513, AAEL012513	calcium-binding protein E63-1	calcium-binding protein E63-1		2	NC_035108.1	76327624	76699912	minus	20
LOC5573345	13.4256	-4.38015	0.949705	-4.61212	3.99e-06	4.46e-05	LOC5573345	AaeL_AAEL010435, AAEL010435	protein G12	protein G12		2	NC_035108.1	337930658	337932024	minus	4
LOC5573098	277.391	0.759016	0.164687	4.60884	4.05e-06	4.53e-05	LOC5573098		microsomal triglyceride transfer protein large subunit	microsomal triglyceride transfer protein large subunit		2	NC_035108.1	340963717	340973868	minus	6
LOC110681080	335.522	1.00388	0.217965	4.60571	4.11e-06	4.59e-05	LOC110681080		coronin-1C-like	coronin-1C-like|putative tumor-specific antigen		Un	NW_018736042.1	6534	17598	plus	6
LOC5566558	1232.94	-1.41163	0.307133	-4.59615	4.3e-06	4.81e-05	LOC5566558	AaeL_AAEL005482, AAEL005482, CTL18	macrophage mannose receptor 1	macrophage mannose receptor 1|putative salivary C type lectin		3	NC_035109.1	59341003	59341748	minus	2
LOC5574469	352.593	3.12621	0.680855	4.5916	4.4e-06	4.91e-05	LOC5574469	AaeL_AAEL002378, AAEL002378	esterase B1	esterase B1		2	NC_035108.1	214063012	214070664	minus	5
LOC5580067	224.806	0.880661	0.191882	4.58961	4.44e-06	4.95e-05	LOC5580067	AaeL_AAEL002176, AAEL002176	uncharacterized protein C1683.06c	uncharacterized protein C1683.06c		1	NC_035107.1	25305342	25306453	plus	1
LOC5567081	542.245	0.772793	0.168391	4.58928	4.45e-06	4.96e-05	LOC5567081	AaeL_AAEL005805, AAEL005805, AAEL005808	aminopeptidase N	aminopeptidase N		1	NC_035107.1	201666263	201671984	minus	5
LOC5569135	885.147	0.819589	0.178613	4.58862	4.46e-06	4.97e-05	LOC5569135	AaeL_AAEL007397, AAEL007397, E75, e75A, e75B, e75C	ecdysone-inducible protein E75	ecdysone-inducible protein E75|ecdysone-induced protein 75A|ecdysone-induced protein 75B|ecdysone-induced protein 75C		3	NC_035109.1	407728613	407968714	plus	9
LOC110676961	14.8286	-4.98474	1.08706	-4.58554	4.53e-06	5.04e-05	LOC110676961		uncharacterized LOC110676961			2	NC_035108.1	395703297	395710004	plus	2
LOC5575453	884.228	1.02301	0.223435	4.57853	4.68e-06	5.21e-05	LOC5575453	AaeL_AAEL002638, AAEL002638, CYP9J6	probable cytochrome P450 9f2	probable cytochrome P450 9f2		2	NC_035108.1	245515491	245517353	plus	2
LOC5567857	3244.66	-0.54703	0.119514	-4.57713	4.71e-06	5.24e-05	LOC5567857	AaeL_AAEL006315, AAEL006315	26S proteasome non-ATPase regulatory subunit 2	26S proteasome non-ATPase regulatory subunit 2		3	NC_035109.1	2828074	2852829	plus	5
LOC110673989	1551.79	0.882949	0.192933	4.57646	4.73e-06	5.25e-05	LOC110673989	AaeL_AAEL008494, AAEL008494	mitochondrial basic amino acids transporter-like	mitochondrial basic amino acids transporter-like		2	NC_035108.1	395254274	395268319	minus	3
LOC5570256	74.2301	1.22781	0.268297	4.57631	4.73e-06	5.25e-05	LOC5570256	AaeL_AAEL008213, AAEL008213	solute carrier family 25 member 35	solute carrier family 25 member 35		2	NC_035108.1	6073214	6074191	minus	2
LOC5567715	721.308	-0.814496	0.178009	-4.57559	4.75e-06	5.26e-05	LOC5567715	AaeL_AAEL006300, AAEL006300	etoposide-induced protein 2.4 homolog	etoposide-induced protein 2.4 homolog		2	NC_035108.1	360146653	360156363	minus	4
LOC5568312	263.529	0.700693	0.153264	4.57181	4.84e-06	5.35e-05	LOC5568312	AaeL_AAEL006752, AAEL006752	UPF0489 protein C5orf22 homolog	UPF0489 protein C5orf22 homolog		2	NC_035108.1	83982068	83992092	minus	3
LOC5577482	2275.04	0.540201	0.118196	4.57037	4.87e-06	5.39e-05	LOC5577482	AaeL_AAEL013225, AAEL013225	NADH-cytochrome b5 reductase 3	NADH-cytochrome b5 reductase 3		3	NC_035109.1	340871130	340898941	minus	6
LOC110680553	3533.64	0.470538	0.102967	4.5698	4.88e-06	5.4e-05	LOC110680553		V-type proton ATPase subunit B-like	LOW QUALITY PROTEIN: V-type proton ATPase subunit B-like		Un	NW_018735015.1	14297	17086	minus	2
LOC5571667	4891.02	2.35584	0.515567	4.56941	4.89e-06	5.4e-05	LOC5571667	AaeL_AAEL001641, AAEL001641	uncharacterized LOC5571667	uncharacterized protein LOC5571667		2	NC_035108.1	299037657	299047293	plus	3
LOC5573661	73.0513	1.51086	0.330817	4.56704	4.95e-06	5.46e-05	LOC5573661	AaeL_AAEL010647, AAEL010647	nose resistant to fluoxetine protein 6	nose resistant to fluoxetine protein 6		2	NC_035108.1	98301748	98334010	minus	9
LOC5569381	72.8834	-1.19683	0.262182	-4.56487	5e-06	5.51e-05	LOC5569381	AaeL_AAEL007582, AAEL007582	trypsin 3A1-like	trypsin 3A1-like		2	NC_035108.1	344241005	344249908	minus	4
LOC110675740	1026.67	-0.554919	0.121565	-4.56477	5e-06	5.51e-05	LOC110675740		NECAP-like protein CG9132	NECAP-like protein CG9132		1	NC_035107.1	45550654	45578708	plus	4
LOC110680655	66.8369	2.37257	0.519855	4.56391	5.02e-06	5.53e-05	LOC110680655		limulus clotting factor C-like	limulus clotting factor C-like		Un	NW_018735178.1	18876	20028	minus	2
LOC5574712	545.445	-0.841934	0.184516	-4.56293	5.04e-06	5.55e-05	LOC5574712	AaeL_AAEL009967, AAEL009967	dnaJ homolog subfamily C member 22	dnaJ homolog subfamily C member 22|predicted membrane protein		2	NC_035108.1	93043300	93053946	minus	4
LOC5571084	10417.1	0.902557	0.197899	4.5607	5.1e-06	5.61e-05	LOC5571084	AaeL_AAEL008789, AAEL008789	apolipophorin-3	apolipophorin-3		3	NC_035109.1	132553740	132554769	minus	2
LOC5571215	1378.64	-0.600265	0.131637	-4.56001	5.12e-06	5.62e-05	LOC5571215	AaeL_AAEL007191, AAEL007191, AAEL008913	proton-coupled amino acid transporter-like protein CG1139	proton-coupled amino acid transporter-like protein CG1139|amino acid transporter PAT1		2	NC_035108.1	318184880	318273549	plus	7
LOC5568106	55.4391	-1.3548	0.297226	-4.55814	5.16e-06	5.67e-05	LOC5568106	AaeL_AAEL006561, AAEL006561	uncharacterized LOC5568106	uncharacterized protein LOC5568106		2	NC_035108.1	59044294	59151237	plus	4
LOC5566358	474.736	0.662998	0.145473	4.55755	5.18e-06	5.68e-05	LOC5566358	AaeL_AAEL005312, AAEL005312	leucine-rich melanocyte differentiation-associated protein	leucine-rich melanocyte differentiation-associated protein|U2-associated snRNP A' protein		2	NC_035108.1	64390708	64421059	minus	6
LOC5578379	206.069	1.11417	0.24447	4.55747	5.18e-06	5.68e-05	LOC5578379	AaeL_AAEL013662, AAEL013662	regucalcin	regucalcin		1	NC_035107.1	155098328	155138368	plus	7
LOC5576979	18585.3	-0.641509	0.140804	-4.55604	5.21e-06	5.71e-05	LOC5576979	AaeL_AAEL003078, AAEL003078, AAEL003082	trichohyalin	trichohyalin|uncharacterized protein LOC5576979		2	NC_035108.1	212810924	212934492	plus	12
LOC5570506	181.513	-0.777213	0.170598	-4.55582	5.22e-06	5.71e-05	LOC5570506	AaeL_AAEL001407, AAEL001407	cyclin-dependent kinase 4	cyclin-dependent kinase 4		2	NC_035108.1	45750050	45762145	plus	5
LOC110681032	5429.4	-0.472847	0.103888	-4.55151	5.33e-06	5.83e-05	LOC110681032		ATP synthase subunit delta, mitochondrial-like	LOW QUALITY PROTEIN: ATP synthase subunit delta, mitochondrial-like		Un	NW_018735910.1	73268	73851	minus	2
LOC5564337	115.777	1.11084	0.244137	4.55006	5.36e-06	5.86e-05	LOC5564337	AaeL_AAEL004219, AAEL004202, AAEL004219	GTPase-activating Rap/Ran-GAP domain-like protein 3	GTPase-activating Rap/Ran-GAP domain-like protein 3		3	NC_035109.1	115715195	116184486	plus	15
LOC5566931	97.2587	2.45066	0.538601	4.55006	5.36e-06	5.86e-05	LOC5566931	AaeL_AAEL005687, AAEL005687	ejaculatory bulb-specific protein 3	ejaculatory bulb-specific protein 3		3	NC_035109.1	115196953	115197984	plus	1
LOC5568508	1150	-0.611171	0.134327	-4.54986	5.37e-06	5.86e-05	LOC5568508	AaeL_AAEL006918, AAEL006918	UPF0528 protein CG10038	UPF0528 protein CG10038|conserved protein		3	NC_035109.1	143904090	143952272	plus	6
LOC5579887	594.759	-0.624522	0.137271	-4.54957	5.38e-06	5.86e-05	LOC5579887	AaeL_AAEL001024, AAEL001024	solute carrier family 25 member 51	solute carrier family 25 member 51		3	NC_035109.1	55897496	55916455	minus	4
LOC5567605	561.028	0.6592	0.144977	4.54693	5.44e-06	5.93e-05	LOC5567605		uncharacterized LOC5567605	uncharacterized protein LOC5567605		3	NC_035109.1	149652245	149659539	plus	5
LOC110675803	217.182	0.952364	0.20948	4.54631	5.46e-06	5.94e-05	LOC110675803		WD repeat, SAM and U-box domain-containing protein 1-like	WD repeat, SAM and U-box domain-containing protein 1-like		2	NC_035108.1	96392904	96450277	plus	9
LOC110677104	23.9928	3.14946	0.692962	4.54492	5.5e-06	5.98e-05	LOC110677104		uncharacterized LOC110677104			1	NC_035107.1	130660419	130685659	minus	3
LOC5571382	1552.01	3.31898	0.730266	4.5449	5.5e-06	5.98e-05	LOC5571382	AaeL_AAEL009018, AAEL009018, CYP6CB1	probable cytochrome P450 6a14	probable cytochrome P450 6a14|cytochrome P450 6CB1		1	NC_035107.1	58798630	58800576	minus	2
LOC5569794	469.664	-0.65447	0.14402	-4.5443	5.51e-06	5.99e-05	LOC5569794	AaeL_AAEL001299, AAEL001299	patched domain-containing protein 3	patched domain-containing protein 3		3	NC_035109.1	327151042	327475689	minus	9
LOC5570126	285.732	-0.688289	0.151614	-4.53975	5.63e-06	6.11e-05	LOC5570126	AaeL_AAEL008118, AAEL008118, mab-21	protein mab-21	protein mab-21|MAB21_AEDAE		1	NC_035107.1	24789063	24815980	plus	2
LOC5579966	2020.89	0.655362	0.144389	4.53888	5.66e-06	6.13e-05	LOC5579966	AaeL_AAEL013293, AAEL004394, AAEL007586, AAEL013293	nuclear pore complex protein Nup98-Nup96	nuclear pore complex protein Nup98-Nup96		1	NC_035107.1	302207999	302263387	minus	5
LOC23687599	120.49	-1.12885	0.248898	-4.5354	5.75e-06	6.23e-05	LOC23687599	AaeL_AAEL017179, AAEL017179	farnesol dehydrogenase-like	farnesol dehydrogenase-like		3	NC_035109.1	350829735	350830791	minus	2
LOC5574210	379.468	0.870249	0.191901	4.53488	5.76e-06	6.24e-05	LOC5574210	AaeL_AAEL002317, AAEL002317, INSR_AEDAE, InR, MIR	insulin-like receptor	insulin-like receptor|insulin receptor		3	NC_035109.1	373286401	373542069	minus	16
LOC5566024	424.967	0.917803	0.2024	4.5346	5.77e-06	6.25e-05	LOC5566024	AaeL_AAEL005112, AAEL005112, AAEL017389, CCEae3A	esterase B1	esterase B1|alpha-esterase CCEae3A		2	NC_035108.1	174400171	174416020	minus	3
LOC5563621	1821.16	0.999989	0.220656	4.53189	5.85e-06	6.32e-05	LOC5563621	AaeL_AAEL000064, AAEL000064, DCE, Dce1	L-dopachrome tautomerase yellow-f2	L-dopachrome tautomerase yellow-f2|dopachrome conversion enzyme		1	NC_035107.1	243039234	243055025	minus	5
LOC5567505	433.863	-0.717971	0.158457	-4.53102	5.87e-06	6.34e-05	LOC5567505	AaeL_AAEL006118, AAEL006118	39S ribosomal protein L55, mitochondrial	39S ribosomal protein L55, mitochondrial		1	NC_035107.1	265979826	265981439	plus	2
LOC5567882	380.277	-0.903033	0.19932	-4.53057	5.88e-06	6.35e-05	LOC5567882	AaeL_AAEL006341, AAEL006341	uncharacterized LOC5567882	uncharacterized protein LOC5567882		3	NC_035109.1	396848991	396891330	minus	6
LOC5570022	72.3687	1.65082	0.36443	4.52988	5.9e-06	6.37e-05	LOC5570022	AaeL_AAEL000206, AAEL000206	ninjurin-2	ninjurin-2		3	NC_035109.1	213099516	213100251	minus	3
LOC5579528	525.266	-0.832013	0.183704	-4.5291	5.92e-06	6.39e-05	LOC5579528	AaeL_AAEL014227, AAEL014227, shakB	innexin shaking-B	innexin shaking-B|SHAKB_AEDAE		3	NC_035109.1	197348027	197625204	minus	18
LOC5575983	2210.22	0.921275	0.203446	4.52835	5.94e-06	6.41e-05	LOC5575983	AaeL_AAEL017286, AAEL017286	myc protein	myc protein		1	NC_035107.1	1569995	1988248	plus	5
LOC5575776	2463.03	-1.09342	0.241566	-4.52638	6e-06	6.46e-05	LOC5575776	AaeL_AAEL002718, AAEL002718	uncharacterized LOC5575776	uncharacterized protein LOC5575776		3	NC_035109.1	125588140	125711451	plus	14
LOC5573491	126.327	1.01774	0.224893	4.52545	6.03e-06	6.48e-05	LOC5573491	AaeL_AAEL010536, AAEL010536	maltase 2	maltase 2		2	NC_035108.1	314846749	314875057	plus	7
LOC5569550	502.634	0.671187	0.148415	4.52236	6.12e-06	6.57e-05	LOC5569550	AaeL_AAEL007748, AAEL007748, SCRB10	protein peste	protein peste		1	NC_035107.1	70491121	70518895	minus	4
LOC23687765	2903.15	0.911372	0.201767	4.51696	6.27e-06	6.74e-05	LOC23687765	AaeL_AAEL017345, AAEL017345	hyphally-regulated protein	hyphally-regulated protein		3	NC_035109.1	14728190	14729443	plus	2
LOC110676605	24.3205	2.48449	0.550108	4.51637	6.29e-06	6.75e-05	LOC110676605		uncharacterized LOC110676605	uncharacterized protein LOC110676605		2	NC_035108.1	23759210	23760265	plus	2
LOC5574607	1395.38	-0.671921	0.148829	-4.51473	6.34e-06	6.8e-05	LOC5574607	AaeL_AAEL002412, AAEL002412	monocarboxylate transporter 12	monocarboxylate transporter 12		1	NC_035107.1	176590436	176642232	minus	3
LOC110679655	338.866	-0.758704	0.168107	-4.51322	6.38e-06	6.84e-05	LOC110679655		uncharacterized LOC110679655			3	NC_035109.1	88583226	88632883	plus	3
LOC5565416	76.8848	1.47649	0.327196	4.51256	6.4e-06	6.86e-05	LOC5565416		uncharacterized LOC5565416			3	NC_035109.1	395723843	395725682	plus	2
LOC5565332	264.464	-1.22508	0.271567	-4.51116	6.45e-06	6.9e-05	LOC5565332	AaeL_AAEL014823, AAEL014823	uncharacterized LOC5565332	uncharacterized protein LOC5565332		1	NC_035107.1	149348820	149402818	minus	5
LOC5577626	1656.98	0.618104	0.137143	4.50699	6.58e-06	7.03e-05	LOC5577626	AaeL_AAEL003210, AAEL003210	CD63 antigen	CD63 antigen|tetraspanin		2	NC_035108.1	367247420	367257129	minus	10
LOC5569861	273.502	-1.0467	0.232275	-4.50632	6.6e-06	7.05e-05	LOC5569861	AaeL_AAEL007952, AAEL007952	suppressor APC domain-containing protein 2	suppressor APC domain-containing protein 2		2	NC_035108.1	351738731	351765477	plus	4
LOC5565942	2481.65	0.791167	0.175603	4.50543	6.62e-06	7.07e-05	LOC5565942	AaeL_AAEL005077, AAEL005055, AAEL005077	segmentation protein cap'n'collar	segmentation protein cap'n'collar		1	NC_035107.1	295023038	295278987	minus	14
LOC5569390	236.627	-0.709894	0.157592	-4.50462	6.65e-06	7.09e-05	LOC5569390		small integral membrane protein 4	small integral membrane protein 4		2	NC_035108.1	343930844	343931533	minus	2
LOC5567651	662.892	-0.613234	0.136148	-4.50416	6.66e-06	7.11e-05	LOC5567651	AaeL_AAEL006235, AAEL006235	uncharacterized LOC5567651	uncharacterized protein LOC5567651		2	NC_035108.1	242350593	242447942	plus	7
LOC5567222	1795.92	0.491805	0.109227	4.50261	6.71e-06	7.15e-05	LOC5567222	AaeL_AAEL000888, AAEL000888	single-stranded DNA-binding protein 3	single-stranded DNA-binding protein 3		3	NC_035109.1	332663653	332840075	plus	15
LOC5576211	124.322	-0.973594	0.216333	-4.50045	6.78e-06	7.22e-05	LOC5576211	AaeL_AAEL002824, AAEL002824	uncharacterized LOC5576211	uncharacterized protein LOC5576211		3	NC_035109.1	235285120	235306251	minus	5
LOC5579485	947.709	-0.58214	0.129417	-4.49818	6.85e-06	7.29e-05	LOC5579485	AaeL_AAEL015296, AAEL011012, AAEL015296	septin-4	septin-4		1	NC_035107.1	73834293	73915892	minus	7
LOC5563809	279.956	0.86136	0.191676	4.49383	7e-06	7.44e-05	LOC5563809	AaeL_AAEL014140, AAEL014140, CLIPB24	melanization protease 1	melanization protease 1		2	NC_035108.1	305740516	305752630	plus	7
LOC5568007	11730.8	1.05035	0.233755	4.49339	7.01e-06	7.45e-05	LOC5568007	AaeL_AAEL006446, AAEL006446	alpha,alpha-trehalose-phosphate synthase [UDP-forming]	alpha,alpha-trehalose-phosphate synthase [UDP-forming]		2	NC_035108.1	439488100	439516576	minus	5
LOC5572918	2975.39	1.38727	0.308745	4.49327	7.01e-06	7.45e-05	LOC5572918	AaeL_AAEL010139, AAEL010139	putative defense protein 1	putative defense protein 1		2	NC_035108.1	264662071	264678075	plus	3
LOC5572136	107.404	-1.37541	0.306216	-4.49163	7.07e-06	7.5e-05	LOC5572136	AaeL_AAEL009549, AAEL009548, AAEL009549	potassium channel subfamily K member 18	potassium channel subfamily K member 18		3	NC_035109.1	211544887	211715020	plus	12
LOC5579797	1454.18	-0.498836	0.111141	-4.48831	7.18e-06	7.61e-05	LOC5579797	AaeL_AAEL003972, AAEL003972	desumoylating isopeptidase 2	desumoylating isopeptidase 2		3	NC_035109.1	268227316	268246050	minus	6
LOC5575931	2540.06	0.539916	0.120328	4.48704	7.22e-06	7.65e-05	LOC5575931	AaeL_AAEL012165, AAEL012161, AAEL012165	aldehyde dehydrogenase, dimeric NADP-preferring	aldehyde dehydrogenase, dimeric NADP-preferring|aldehyde dehydrogenase 3-1 varian D		2	NC_035108.1	203848448	203954174	minus	19
LOC5570020	4824.54	-0.437104	0.0974287	-4.4864	7.24e-06	7.66e-05	LOC5570020	AaeL_AAEL000182, AAEL000182	cytochrome b-c1 complex subunit 9	cytochrome b-c1 complex subunit 9|mitochondrial ubiquinol-cytochrome c reductase complex 7.2 kDa protein		3	NC_035109.1	213029278	213029697	minus	2
LOC5572121	956.744	-0.557975	0.124375	-4.48625	7.25e-06	7.66e-05	LOC5572121	AaeL_AAEL009526, AAEL009526	cytochrome c oxidase assembly factor 3, mitochondrial	cytochrome c oxidase assembly factor 3, mitochondrial		3	NC_035109.1	223847629	223863203	plus	2
LOC5572122	956.744	-0.557975	0.124375	-4.48625	7.25e-06	7.66e-05	LOC5572122	AaeL_AAEL009534, AAEL009534	dimethyladenosine transferase 1, mitochondrial	dimethyladenosine transferase 1, mitochondrial		3	NC_035109.1	223847590	223863203	plus	2
LOC5565233	2406.58	-0.569029	0.12685	-4.48585	7.26e-06	7.67e-05	LOC5565233	AaeL_AAEL004666, AAEL004666	focal adhesion kinase 1	focal adhesion kinase 1		3	NC_035109.1	246268876	246591250	plus	18
LOC5572744	1147.86	0.902175	0.201142	4.48526	7.28e-06	7.69e-05	LOC5572744	AaeL_AAEL010014, AAEL010014	uncharacterized LOC5572744	uncharacterized protein LOC5572744		2	NC_035108.1	92249057	92275200	plus	7
LOC5572582	1445.84	-0.659785	0.147217	-4.48173	7.4e-06	7.81e-05	LOC5572582	AaeL_AAEL009898, AAEL009898	proteasome subunit alpha type-6	proteasome subunit alpha type-6		1	NC_035107.1	207254858	207269412	plus	3
LOC110676526	47.3426	-1.46108	0.326159	-4.47965	7.48e-06	7.87e-05	LOC110676526		uncharacterized LOC110676526			2	NC_035108.1	248856334	248858452	minus	2
LOC5579047	61.0916	2.85819	0.638039	4.47965	7.48e-06	7.87e-05	LOC5579047	AaeL_AAEL013990, AAEL013990	hexamerin-1.1	hexamerin-1.1		3	NC_035109.1	230621605	230624001	plus	3
LOC5577252	1817.43	0.615064	0.137329	4.47877	7.51e-06	7.9e-05	LOC5577252	AaeL_AAEL013111, AAEL013111, EAAT	excitatory amino acid transporter 1	excitatory amino acid transporter 1		1	NC_035107.1	142683477	142750134	plus	7
LOC5568854	1222.27	0.545618	0.121841	4.47811	7.53e-06	7.92e-05	LOC5568854	AaeL_AAEL007151, AAEL007151, AAEL007165	cytospin-A	cytospin-A		3	NC_035109.1	190908317	191049555	minus	17
LOC5576416	1909.63	0.721607	0.161254	4.47496	7.64e-06	8.03e-05	LOC5576416	AaeL_AAEL012509, AAEL012509	venom carboxylesterase-6	venom carboxylesterase-6		2	NC_035108.1	76225555	76227586	plus	2
LOC5569634	259.443	1.00658	0.225026	4.47316	7.71e-06	8.09e-05	LOC5569634	AaeL_AAEL007784, AAEL007784	uncharacterized LOC5569634	uncharacterized protein LOC5569634		3	NC_035109.1	134049371	134050680	plus	2
LOC5570854	104.803	-1.01759	0.227489	-4.47312	7.71e-06	8.09e-05	LOC5570854	AaeL_AAEL008623, AAEL008623	eRF1 methyltransferase catalytic subunit MTQ2	eRF1 methyltransferase catalytic subunit MTQ2		2	NC_035108.1	454806349	454807901	minus	1
LOC5566119	3888.33	0.432352	0.0966803	4.47197	7.75e-06	8.13e-05	LOC5566119	AaeL_AAEL015594, AAEL005173, AAEL015594	V-type proton ATPase subunit C	V-type proton ATPase subunit C|V-ATPase C subunit		2	NC_035108.1	680658	705528	plus	11
LOC5572378	516.703	0.642594	0.143708	4.47153	7.77e-06	8.13e-05	LOC5572378	AaeL_AAEL009766, AAEL009766	lipoamide acyltransferase component of branched-chain alpha-keto acid dehydrogenase complex, mitochondrial	lipoamide acyltransferase component of branched-chain alpha-keto acid dehydrogenase complex, mitochondrial		1	NC_035107.1	4199682	4202105	minus	4
LOC5572080	294.735	-0.810381	0.181233	-4.4715	7.77e-06	8.13e-05	LOC5572080	AaeL_AAEL009497, AAEL009497	probable phosphomannomutase	probable phosphomannomutase		3	NC_035109.1	344953186	344954257	minus	1
LOC5577632	488.455	0.706355	0.15814	4.46664	7.95e-06	8.31e-05	LOC5577632	AaeL_AAEL003224, AAEL003224	growth/differentiation factor 8	growth/differentiation factor 8		1	NC_035107.1	292282258	292309951	plus	3
LOC5565051	2276.37	-0.494498	0.110739	-4.46545	7.99e-06	8.35e-05	LOC5565051	AaeL_AAEL004563, AAEL004563	26S proteasome regulatory subunit 10B	26S proteasome regulatory subunit 10B|26S proteasome regulatory complex ATPase RPT4		1	NC_035107.1	144860418	144887381	plus	3
LOC5574010	253.134	-1.01458	0.227212	-4.46534	7.99e-06	8.35e-05	LOC5574010		integral membrane protein GPR180	LOW QUALITY PROTEIN: integral membrane protein GPR180		Un	NW_018734961.1	23513	35899	minus	6
LOC5572425	244.639	0.790414	0.177144	4.46199	8.12e-06	8.48e-05	LOC5572425		microsomal triglyceride transfer protein large subunit	LOW QUALITY PROTEIN: microsomal triglyceride transfer protein large subunit		Un	NW_018734885.1	66185	76330	plus	6
LOC5572450	575.332	1.0089	0.226134	4.46149	8.14e-06	8.49e-05	LOC5572450	AaeL_AAEL001835, AAEL001835	sodium-coupled monocarboxylate transporter 1	sodium-coupled monocarboxylate transporter 1		2	NC_035108.1	375315859	375329969	minus	8
LOC5576079	1948.81	-0.444946	0.0997669	-4.45985	8.2e-06	8.55e-05	LOC5576079	AaeL_AAEL012317, AAEL012317	MICOS complex subunit MIC13 homolog QIL1	MICOS complex subunit MIC13 homolog QIL1		2	NC_035108.1	102906001	102908621	minus	3
LOC5577180	969.431	-0.610875	0.137033	-4.45787	8.28e-06	8.62e-05	LOC5577180	AaeL_AAEL013052, AAEL013052	ubiquitin carboxyl-terminal hydrolase	ubiquitin carboxyl-terminal hydrolase		3	NC_035109.1	310492268	310504566	plus	3
LOC5564187	17.2738	-2.9551	0.663136	-4.45625	8.34e-06	8.67e-05	LOC5564187		uncharacterized LOC5564187			1	NC_035107.1	250594985	250602136	plus	4
LOC5571046	564.757	-0.54214	0.121662	-4.45613	8.35e-06	8.67e-05	LOC5571046	AaeL_AAEL008783, AAEL008783	prostaglandin E synthase 2	prostaglandin E synthase 2		2	NC_035108.1	198820136	198822193	plus	3
LOC110677074	11.0175	-3.74425	0.84025	-4.45612	8.35e-06	8.67e-05	LOC110677074		uncharacterized LOC110677074	uncharacterized protein LOC110677074		2	NC_035108.1	429216597	429217221	minus	2
LOC110675609	2183.21	0.944134	0.21197	4.45409	8.42e-06	8.75e-05	LOC110675609		uncharacterized LOC110675609	uncharacterized protein LOC110675609		2	NC_035108.1	64822152	64823541	minus	1
LOC5566760	823.985	1.16871	0.262463	4.45286	8.47e-06	8.79e-05	LOC5566760	AaeL_AAEL005618, AAEL005618	uncharacterized LOC5566760	uncharacterized protein LOC5566760		3	NC_035109.1	20944240	21034676	plus	9
LOC5576633	23.4913	-2.02527	0.454941	-4.45172	8.52e-06	8.83e-05	LOC5576633	AaeL_AAEL012659, AAEL012659	serine/threonine-protein kinase Nek5	serine/threonine-protein kinase Nek5		2	NC_035108.1	18754857	18764491	minus	2
LOC5575514	331.713	1.14822	0.257941	4.45149	8.53e-06	8.83e-05	LOC5575514	AaeL_AAEL011892, AAEL011892	guanine nucleotide-binding protein subunit beta-like protein 1	guanine nucleotide-binding protein subunit beta-like protein 1		3	NC_035109.1	317151324	317153500	minus	2
LOC5572559	2283.28	0.516208	0.115963	4.45148	8.53e-06	8.83e-05	LOC5572559	AaeL_AAEL009895, AAEL009895	endothelin-converting enzyme homolog	endothelin-converting enzyme homolog		3	NC_035109.1	121965911	122095788	minus	12
LOC5564518	4284.52	-0.788617	0.177199	-4.45045	8.57e-06	8.87e-05	LOC5564518	AaeL_AAEL014490, AAEL014194, AAEL014490	microtubule-associated protein Jupiter	microtubule-associated protein Jupiter		3	NC_035109.1	64425951	64592823	minus	8
LOC5565637	1968.59	-0.485518	0.10922	-4.44533	8.78e-06	9.07e-05	LOC5565637	AaeL_AAEL014915, AAEL014915	26S proteasome non-ATPase regulatory subunit 13	26S proteasome non-ATPase regulatory subunit 13		1	NC_035107.1	303695265	303705044	plus	6
LOC5577775	1125.85	2.62324	0.590359	4.44346	8.85e-06	9.15e-05	LOC5577775	AaeL_AAEL003299, AAEL003299	uncharacterized LOC5577775	uncharacterized protein LOC5577775		3	NC_035109.1	330245556	330246486	minus	3
LOC5569408	1933.84	0.413601	0.0931117	4.44199	8.91e-06	9.2e-05	TOLL5A	AaeL_AAEL007619, AAEL007619	toll 5A	protein toll		1	NC_035107.1	42268258	42288972	plus	4
LOC23687973	28.5452	-1.86308	0.420084	-4.43501	9.21e-06	9.5e-05	LOC23687973	AaeL_AAEL017553, AAEL017553	esterase B1	esterase B1		2	NC_035108.1	214004933	214025611	plus	4
LOC5579146	993.26	0.59348	0.133887	4.43269	9.31e-06	9.6e-05	LOC5579146	AaeL_AAEL014022, AAEL014018, AAEL014022	transcriptional coactivator yorkie	transcriptional coactivator yorkie		2	NC_035108.1	58120999	58292079	minus	7
LOC5569591	1293.56	-0.556295	0.125554	-4.43073	9.39e-06	9.68e-05	LOC5569591	AaeL_AAEL001266, AAEL001266	NSFL1 cofactor p47	NSFL1 cofactor p47|potein tyrosine phosphatase SHP1		2	NC_035108.1	155129782	155154574	plus	6
LOC5566982	1797.13	0.791764	0.178712	4.43038	9.41e-06	9.68e-05	LOC5566982	AaeL_AAEL005731, AAEL005731, AAEL005741, FoxL	forkhead box protein E3	forkhead box protein E3|forkhead box subgroup L		2	NC_035108.1	437382675	437450590	minus	10
LOC110677993	123.99	1.37495	0.310377	4.42994	9.43e-06	9.7e-05	LOC110677993		uncharacterized LOC110677993			3	NC_035109.1	325307438	325328900	minus	3
LOC5579001	246.544	0.953456	0.21533	4.42789	9.52e-06	9.78e-05	LOC5579001	AaeL_AAEL003803, AAEL003803	uncharacterized LOC5579001	uncharacterized protein LOC5579001		1	NC_035107.1	45172178	45173241	minus	2
LOC5571838	97.0585	2.78774	0.629862	4.42596	9.6e-06	9.86e-05	LOC5571838	AaeL_AAEL001693, AAEL001693	serine protease SP24D	serine protease SP24D		2	NC_035108.1	87941517	87942516	minus	2
LOC5566384	279.179	-0.661231	0.149505	-4.42282	9.74e-06	0.0001	LOC5566384	AaeL_AAEL005345, AAEL005345, AAEL801207	uncharacterized LOC5566384	uncharacterized protein LOC5566384		2	NC_035108.1	370090899	370171307	plus	7
LOC5571347	116.907	-1.27923	0.28924	-4.42274	9.75e-06	0.0001	LOC5571347	AaeL_AAEL014975, AAEL009002, AAEL014975	cuticle protein 8	cuticle protein 8		2	NC_035108.1	178198351	178252785	plus	6
LOC5576125	224.808	-0.816421	0.184664	-4.42111	9.82e-06	0.000100668	LOC5576125	AaeL_AAEL002814, AAEL002814	uncharacterized LOC5576125	uncharacterized protein LOC5576125		1	NC_035107.1	305033664	305071013	plus	4
LOC5573033	2761.98	1.09984	0.248779	4.42094	9.83e-06	0.000100674	LOC5573033	AaeL_AAEL013821, AAEL010206, AAEL013821	xylulose kinase	xylulose kinase		1	NC_035107.1	35818006	35827892	plus	3
LOC5565401	699.602	-1.15092	0.260487	-4.41833	9.95e-06	0.000101826	LOC5565401	AaeL_AAEL014840, AAEL014840	17-beta-hydroxysteroid dehydrogenase 13	17-beta-hydroxysteroid dehydrogenase 13		2	NC_035108.1	139951591	139960777	plus	6
LOC5574969	1259.56	-0.806636	0.182605	-4.41738	9.99e-06	0.000102201	LOC5574969	AaeL_AAEL002499, AAEL002499	zinc finger and BTB domain-containing protein 49	zinc finger and BTB domain-containing protein 49		1	NC_035107.1	91121216	91246247	plus	6
LOC5578994	1958.38	-0.437037	0.0989578	-4.4164	1e-05	0.000102593	LOC5578994	AaeL_AAEL003801, AAEL003801	28S ribosomal protein S5, mitochondrial	28S ribosomal protein S5, mitochondrial		1	NC_035107.1	203194971	203200551	minus	2
LOC110673976	264.446	1.35992	0.308115	4.41367	1.02e-05	0.00010382	LOC110673976	AAEL001892	uncharacterized LOC110673976	uncharacterized protein LOC110673976		2	NC_035108.1	390836453	390837973	plus	2
LOC5572074	1671.02	0.457386	0.103636	4.41339	1.02e-05	0.000103881	LOC5572074	AaeL_AAEL001725, AAEL001725, AAEL801238	spermatogenesis-associated protein 20	spermatogenesis-associated protein 20		2	NC_035108.1	443223374	443260047	minus	6
LOC5577568	6710.19	-0.834728	0.189163	-4.41274	1.02e-05	0.000104122	LOC5577568	AaeL_AAEL013279, AAEL013279	peptidyl-prolyl cis-trans isomerase 5	peptidyl-prolyl cis-trans isomerase 5		2	NC_035108.1	94717711	94729781	plus	3
LOC5566335	12985.4	-0.653221	0.14806	-4.41187	1.02e-05	0.000104467	LOC5566335	AaeL_AAEL005317, AAEL005317, AAEL005323	titin	titin|titin homolog|uncharacterized protein LOC5566335|zormin		2	NC_035108.1	63657073	64103075	minus	28
LOC5579911	3395.37	0.779224	0.176756	4.40848	1.04e-05	0.000106041	LOC5579911	AaeL_AAEL001047, AAEL001047	proton-coupled folate transporter	proton-coupled folate transporter		3	NC_035109.1	54481583	54495163	minus	5
LOC110676684	65.3897	1.26926	0.287979	4.40747	1.05e-05	0.000106458	LOC110676684		uncharacterized LOC110676684	uncharacterized protein LOC110676684|salivary secreted proline-rich mucin		2	NC_035108.1	34347270	34347828	minus	1
LOC5573444	1327.97	-0.963859	0.218742	-4.40638	1.05e-05	0.00010692	LOC5573444	AaeL_AAEL010488, AAEL010488	ets DNA-binding protein pokkuri	ets DNA-binding protein pokkuri		2	NC_035108.1	446667026	446738997	minus	5
LOC5579448	12.4664	4.05994	0.922281	4.40207	1.07e-05	0.000108943	LOC5579448	AaeL_AAEL015424, AAEL015424	cuticle protein 19	cuticle protein 19		2	NC_035108.1	178482788	178483807	minus	2
LOC110680554	464.366	0.630889	0.143318	4.40201	1.07e-05	0.000108943	LOC110680554		phosphatidylinositol 4-kinase type 2-alpha	phosphatidylinositol 4-kinase type 2-alpha		Un	NW_018735022.1	12722	28899	plus	4
LOC5571034	1135.24	1.43151	0.325302	4.40056	1.08e-05	0.000109594	LOC5571034	AaeL_AAEL008757, AAEL008757	venom carboxylesterase-6	venom carboxylesterase-6		3	NC_035109.1	326023639	326025510	minus	3
LOC5578729	856.542	-0.519167	0.118029	-4.39866	1.09e-05	0.000110484	LOC5578729	AaeL_AAEL013844, AAEL013844	acyl-CoA-binding protein	acyl-CoA-binding protein		1	NC_035107.1	17886116	17888980	plus	2
LOC5574534	15.557	-3.52762	0.802823	-4.39402	1.11e-05	0.000112783	LOC5574534	AaeL_AAEL011210, AAEL011210	uncharacterized LOC5574534	uncharacterized protein LOC5574534		2	NC_035108.1	194657027	194658772	plus	5
[truncated: 17,841 more rows]

[truncated: 5 more sheets: Supplementary file 1k, Supplementary file 1l, Supplementary file 1m, Supplementary file 1n, Supplementary file 1o]
